# Supplementary material for: NHC-catalyzed enantioselective radical reactions of enal and pyridinium salt: mechanism and origin of regio- and stereoselectivities
Source: Royal Society of Chemistry journal article supplement (doi:10.1039/d3cy00791j), 2023-01-01
Supplement: d3cy00791j1.pdf [file d3cy00791j1.pdf]

## Supporting Information

### **NHC-Catalyzed Enantioselective Radical Reactions of Pyridinium**

#### **Salts: Mechanism and Origin of Regio- and Stereoselectivities**

Kuohong Chen, Jiaming Zhang, Qianqian Shi, Lili Han, Dongmin Fu, Donghui Wei\*, and Yanyan Zhu\*

College of Chemistry, and Institute of Green Catalysis, Zhengzhou University, 100  
Science Avenue, Zhengzhou, Henan 450001, China

E-mail: [donghuiwei@zzu.edu.cn](mailto:donghuiwei@zzu.edu.cn), [zhuyan@zzu.edu.cn](mailto:zhuyan@zzu.edu.cn)

#### **Table of Contents**

Part 1: Computational Details

Part 2: Energy Barriers Involved in Different [1,2]-Proton Transfer Pathways

Part 3: Gibbs Free Energy Changes of the Stepwise PT-SET and SET-PT Pathways

Part 4: Energy Gap Involved in Relayed-PCET Process of <sup>os</sup>**TS3**

Part 5: Possible Pathways of N–N Bond Cleavage

Part 6: Comparison of Different Configurations of <sup>2</sup>**TS5s**

Part 7: Energy Barriers Involved in Different [1,3]-Proton Transfer Pathways

Part 8: Energy Barriers of <sup>2</sup>**TS4** and <sup>2</sup>**TS6R**<sup>1</sup>

Part 9: Local Reactivity Index Analysis

Part 10: Three Dimensional Structures of the Transition States Involved in Case Study

Part 11: ELF Analysis for Transition State <sup>2</sup>**TS7R**

Part 12: The Colorbar Scale of NCI Plots

Part 13: Summary of Absolute SPE, GFEC, and GFE of the Optimized Structures

Part 14: The Energies, Cartesian Coordinates, and Frequencies of the Stationary Points

Part 15: References

## Part 1: Computational Details

All calculations were carried out by using the Gaussian16 program. All the structures were optimized at M06-2X functional with 6-31G(d, p) basis set in hexafluorobenzene (HFB) solvent using the IEF-PCM solvation model. All reactants, products, and intermediates have no imaginary frequency, and each transition state has only one imaginary frequency. The free energies used in discussion were obtained at the M06-2X/6-311++G(d, p)/IEF-PCM<sub>HFB</sub>//M06-2X/6-31G(d, p)/IEF-PCM<sub>HFB</sub> level (denoted as L1 level). The 3D-structures were rendered using the CYLView software.<sup>1</sup> Diagrams of FMO overlap/interaction changes were drawn by Chemcraft.<sup>2</sup> The Figures 2a and 8a of NCI analysis are generated by analyzing the wave function calculated by DFT by Multiwfn software, and the isovalue of equivalence is set to 0.008.

To ensure that the selected L1 level can be applied to obtain reliable results, we have additionally performed calculations for the relayed-PCET process involving stationary points **M3** and <sup>o</sup>**TS3** by employing other different methods and basis sets, i.e., M06-2X/6-311++G(d, p)/SMD<sup>3</sup><sub>HFB</sub>//M06-2X/6-31G(d, p)/IEF-PCM<sub>HFB</sub> (L2), M06-2X/def2-TZVP/IEF-PCM<sub>HFB</sub>//M06-2X/6-31G(d, p)/IEF-PCM<sub>HFB</sub> (L3), M06-2X/def2-TZVP/SMD<sub>HFB</sub>//M06-2X/6-31G(d, p)/IEF-PCM<sub>HFB</sub> (L4),  $\omega$ B97X-D<sup>4</sup>/6-311++G(d, p)/IEF-PCM<sub>HFB</sub>// $\omega$ B97X-D/6-31G(d, p)/IEF-PCM<sub>HFB</sub> (L5) and M06-2X/def2-QZVP/IEF-PCM<sub>HFB</sub>//M06-2X/6-31G(d, p)/IEF-PCM<sub>HFB</sub> (L6). As summarized in **Tables S1 and S2**, there are small differences between the relative Gibbs free energies for the selected stationary points, so it can be concluded that the computed results and computational level L1 are reliable.

The calculation of  $\Delta G_{\text{gas}}$  uses a reference state of 1 atm and the calculations of  $\Delta G_{\text{s}}$  use a reference state of 1M. Based on the  $\Delta G_{\text{gas}}$  reference state (24.46 L at 298.15 K) from 1 atm to 1M, the Gibbs free energy can be computed by using equation  $\Delta G_{\text{gas}}(1\text{M}) = \Delta G_{\text{gas}}(1\text{ atm}) + RT\ln(24.46) = \Delta G_{\text{gas}}(1\text{ atm}) + 1.89\text{ kcal/mol}$ .<sup>5</sup>

Since the transition state <sup>o</sup>**TS3** is an open-shell singlet state, spin contamination is inevitable and small in this system, and the calculated spin contamination information is  $\langle S^{*2} \rangle = 0.2259$  before annihilation, and  $\langle S^{*2} \rangle = 0.0046$  after annihilation by

using M06-2X method, whereas the S\*\*2 value changes from 0.1387 before annihilation to 0.0024 after annihilation by using  $\omega$ B97X-D method.

**Table S1.** Comparisons of relative Gibbs free energies (GFE) for selected stationary points at the different levels L1~L5 (unit: kcal/mol).

|                         | L1  | L2  | L3  | L4  | L5  |
|-------------------------|-----|-----|-----|-----|-----|
| <b>M3</b>               | 0.0 | 0.0 | 0.0 | 0.0 | 0.0 |
| <b><sup>os</sup>TS3</b> | 2.3 | 1.4 | 2.0 | 1.1 | 3.9 |

**Table S2.** Comparisons of relative Gibbs free energies (GFE) for selected stationary points at the different levels L1 and L6 (unit: kcal/mol).

|                         | L1   | L6   |
|-------------------------|------|------|
| <b><sup>2</sup>M6R</b>  | 0.0  | 0.0  |
| <b><sup>2</sup>TS7R</b> | 13.4 | 12.9 |

In addition, the extent of enantioselectivity, in terms of enantiomeric ratio (er), was calculated by using the Boltzmann distribution of diastereomeric transition states with the following equation:

$$\frac{[R]}{[S]} = \frac{\exp\left(\frac{-\Delta G_{[R]}^\ddagger}{RT}\right)}{\exp\left(\frac{-\Delta G_{[S]}^\ddagger}{RT}\right)} = \exp\left(\frac{\Delta\Delta G_{[S]-[R]}^\ddagger}{RT}\right) \quad (1)$$

$$ee = \frac{[R] - [S]}{[R] + [S]} \times 100\% = \frac{\frac{[R]}{[S]} - 1}{\frac{[R]}{[S]} + 1} \times 100\% \quad (2)$$

Where  $\Delta G^\ddagger$  is the GFE barrier of the competing diastereomeric transition state and  $\Delta\Delta G^\ddagger$  is the GFE barrier difference between the two diastereomeric transition states.

## Part 2: Energy Barriers Involved in Different [1,2]-Proton Transfer Pathways

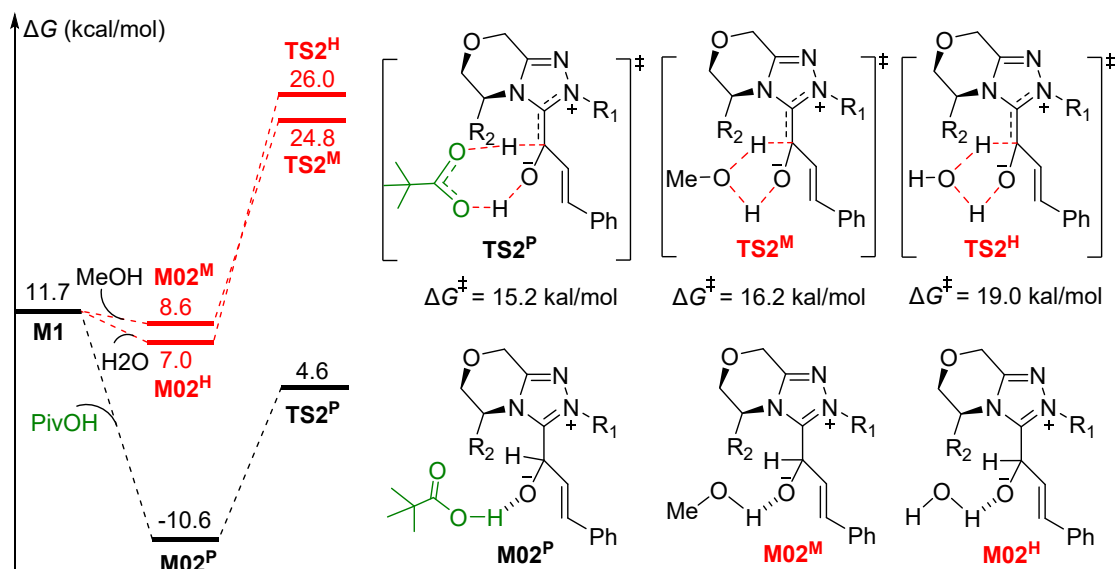

**Figure S1** Energy barriers of MeOH- and H<sub>2</sub>O-assisted proton transfer.

### Part 3: Gibbs Free Energy Changes of the Stepwise PT-SET and SET-PT Pathways

As shown in Figure S2, the Gibbs free energy changes for PT and SET in the PT-SET pathway are 11.7 and 13.0 kcal/mol ( $\Delta G_1$  and  $\Delta G_2$ ), respectively, which is an endothermic process. It is worth noting that we have attempted but failed to find the transition state for the PT process, as the proton always automatically returns to the hydroxy oxygen of intermediate **M2**, and the scan curve shown in Figure S3 displays an increasing energy (>8.3 kcal/mol). For the SET-PT pathway, the Gibbs free energy changes for SET and PT are 14.0 and -9.8 kcal/mol ( $\Delta G_3$  and  $\Delta G_4$ ), respectively. The Gibbs free energy changes for PT in the PT-SET pathway and SET in the SET-PT pathway are both much higher than the energy barrier of <sup>os</sup>**TS3** in the relayed-PCET pathway ( $\Delta G^\ddagger = 2.3$  kcal/mol). Therefore, the relayed proton-coupled electron transfer (relayed-PCET) process is the most energetically favored route for the generation of intermediate <sup>2</sup>**M4**.

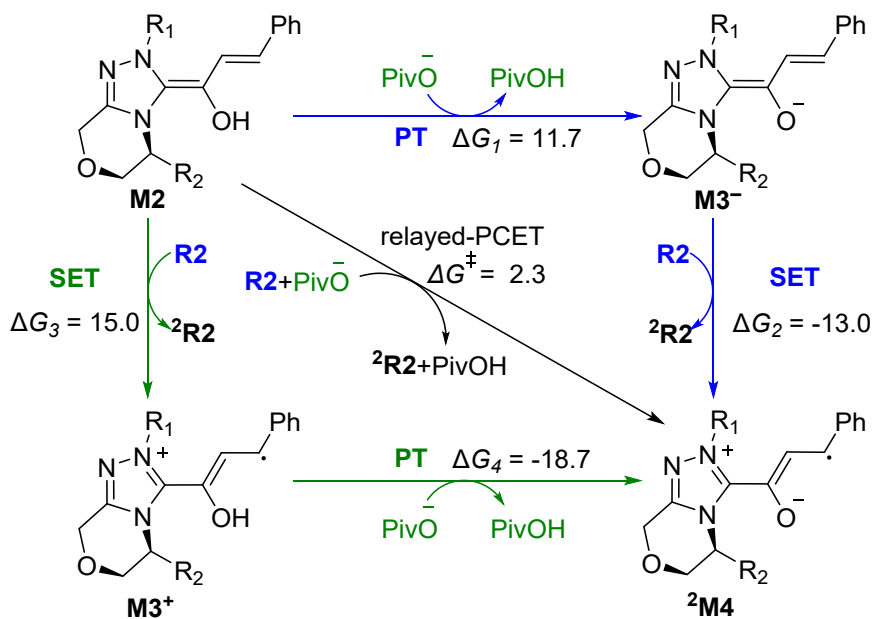

**Figure S2.** The energy barrier and Gibbs energy changes of the possible pathways (unit: kcal/mol).

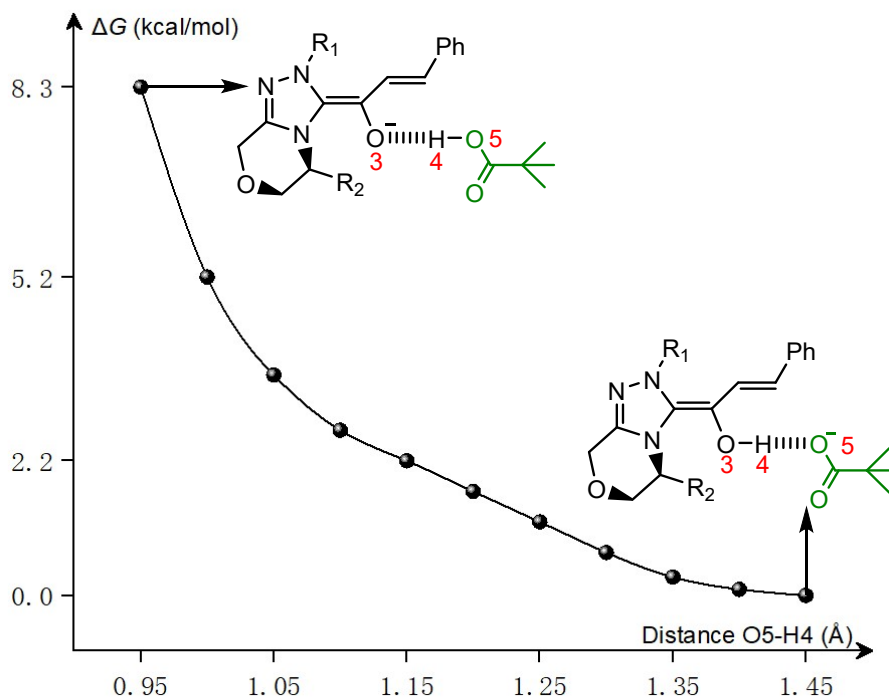

**Figure S3.** The Gibbs free energy changes by reducing the O5-H4 distance in the first proton transfer process of the stepwise PT-SET pathway.

## Part 4: Energy Gap Involved in Relayed-PCET Process of <sup>os</sup>TS3

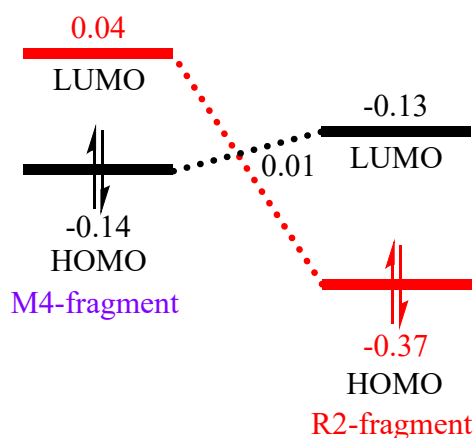

**Scheme S1.** The energy gap between LUMO (R2-fragment) and HOMO (M4-fragment) involved in the relayed-PCET of <sup>os</sup>TS3 (unit: eV).

## Part 5: Possible Pathways of N–N Bond Cleavage

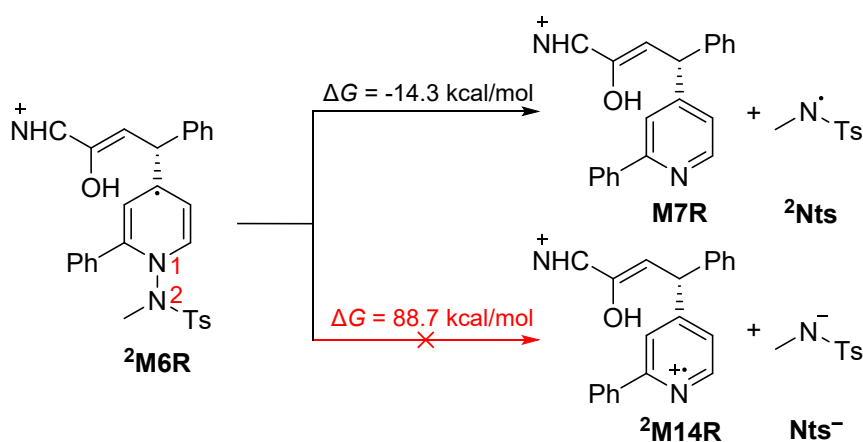

**Scheme S2.** The Gibbs free energy changes of possible pathways of N–N bond cleavage.

## Part 6: Comparison of Different Configurations of <sup>2</sup>TS5s

For the stereoselectivity-determining step, the nucleophilic addition of <sup>2</sup>M4 to pyridinium salt **R2** first undergoes C–C bond formation via four diastereoselective transition states <sup>2</sup>TS5RR/RS/SR/SS(<sup>2</sup>TS5s) to generate intermediates <sup>2</sup>M5Rs. Inspired

by the previous studies, conformational searches of  $^2\text{TS5s}$  have been performed to ensure the configurations of the optimized diastereoselective transition states associated with the lowest energies, separately.

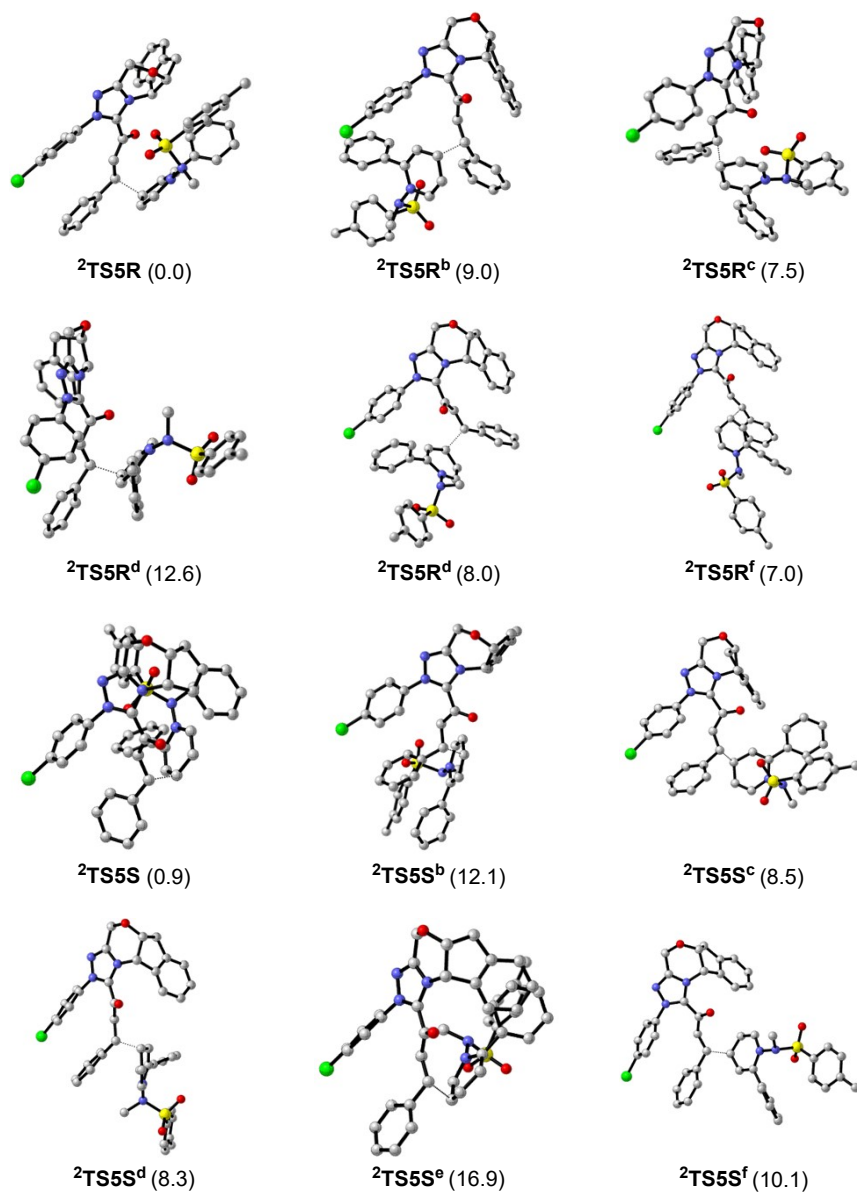

**Figure S4.** Comparison of relative Gibbs free energies ( $\Delta\Delta G^\ddagger$ ) at L1 level of different configurations of  $^2\text{TS5s}$  (unit: kcal/mol).

## Part 7: Energy Barriers Involved in Different [1,3]-Proton Transfer

### Pathways

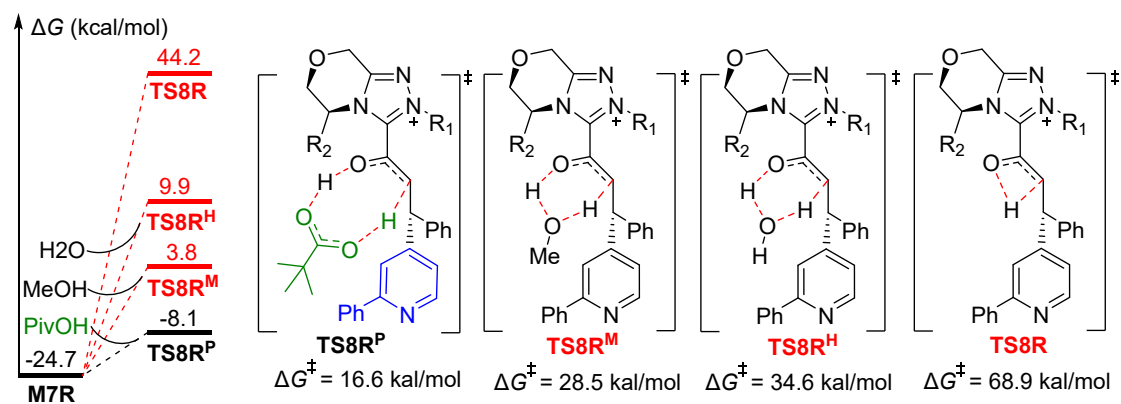

**Figure S5.** Energy barriers of direct proton transfer and MeOH- and H<sub>2</sub>O-assisted proton transfer.

## Part 8: Energy Barriers of <sup>2</sup>TS4 and <sup>2</sup>TS6R<sup>1</sup>

The transition state <sup>2</sup>TS6R<sup>1</sup> of the intermediate <sup>2</sup>M5R through [1,3]-HAT is considered, the energy barrier of this pathway is up to 30.8 kcal/mol, so it can be safely excluded.

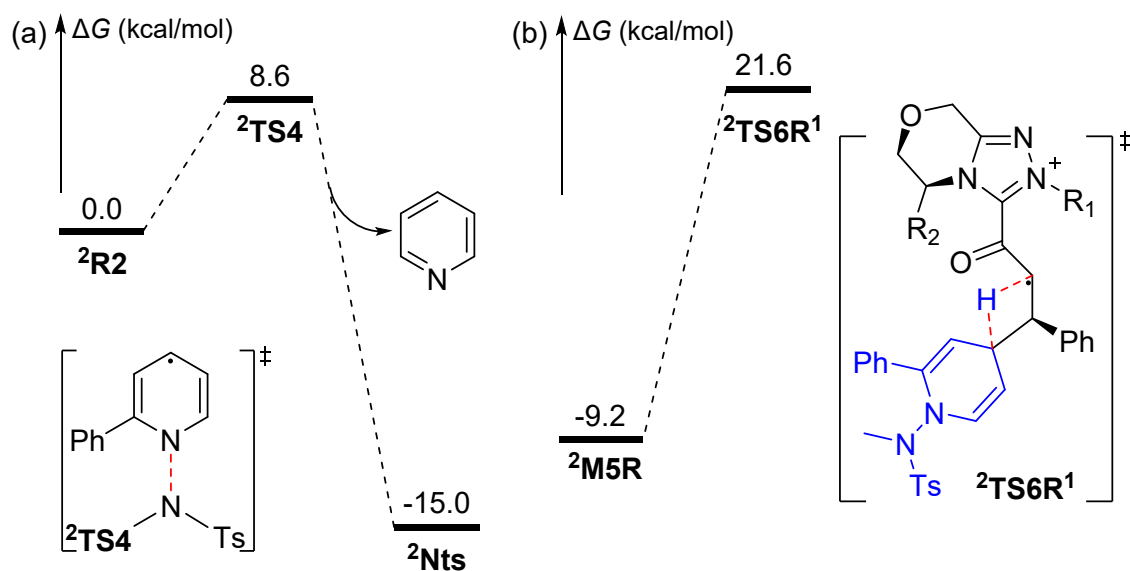

**Figure S6.** Energy barriers of <sup>2</sup>TS4 and <sup>2</sup>TS6R<sup>1</sup>.





## Part 9: Local Reactivity Index Analysis

For disclosing the origin of regioselectivity, we have also performed the local reactivity analysis pioneered by Domingo and coworkers.<sup>6,7</sup> The nucleophilic ( $P_k^-$ ) and electrophilic ( $P_k^+$ ) Parr functions, which allow for the characterization of the nucleophilic and electrophilic sites of a molecule, can be obtained through the analysis of Mulliken atomic spin density (ASD) of the corresponding radical cations (RC) or anions (RA) of the studied molecules, separately. According to Domingo's definition, the Parr functions can be expressed by the following equations:

$$P_k^- = \rho_S^{\text{rc}}(r) \text{ for the electrophilic attacks (3)}$$

$$P_k^+ = \rho_S^{\text{ra}}(r) \text{ for the nucleophilic attacks (4)}$$

where  $\rho_S^{\text{rc}}(r)$  is the ASD of the radical cation and  $\rho_S^{\text{ra}}(r)$  is the ASD of the radical anion. Each ASD condensed at the different atoms of the radical cation and radical anion provides the local nucleophilic  $P_k^-$  and electrophilic  $P_k^+$  Parr functions of the neutral system, respectively.

## Part 10: Three Dimensional Structures of the Transition States

### Involved in Case Study

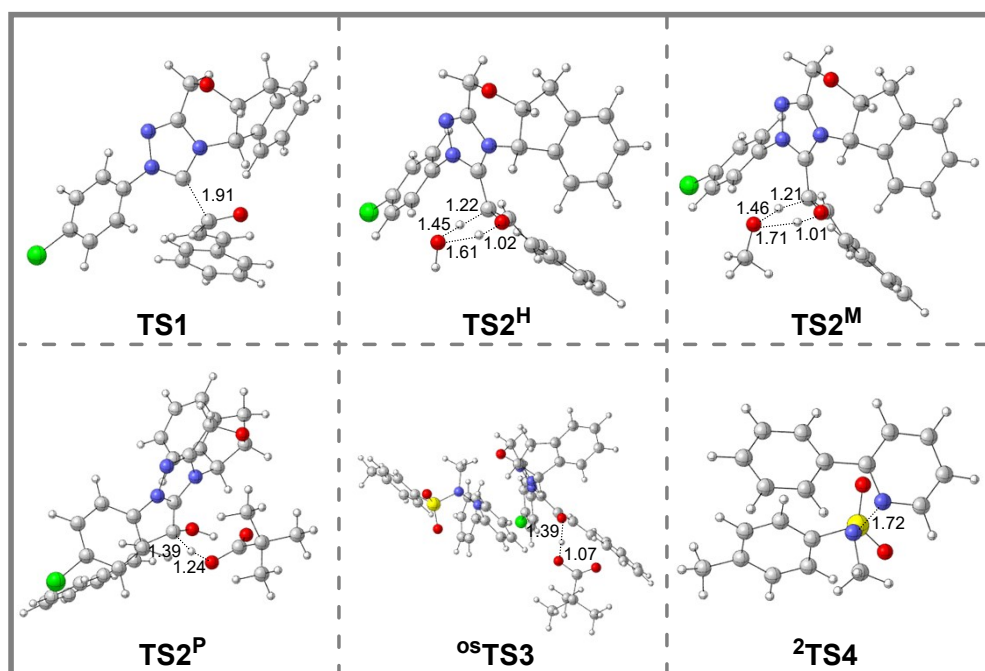

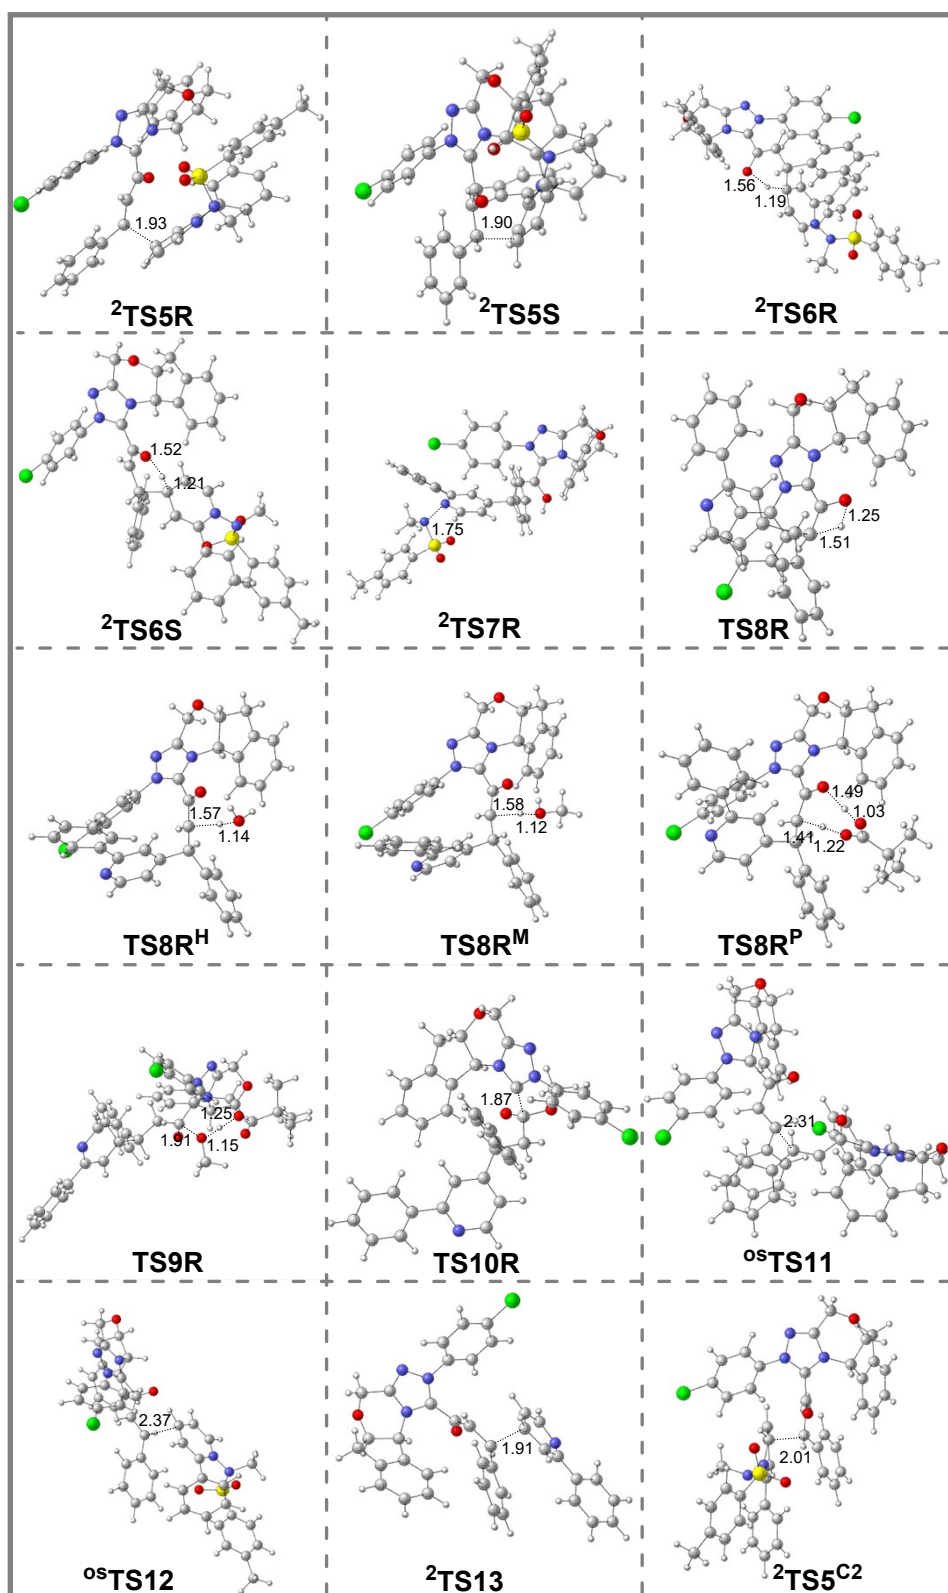

**Figure S7.** Three dimensional structures of the transition states involved in case study (unit: Å).

## Part 11: ELF Analysis for Transition State <sup>2</sup>TS7R

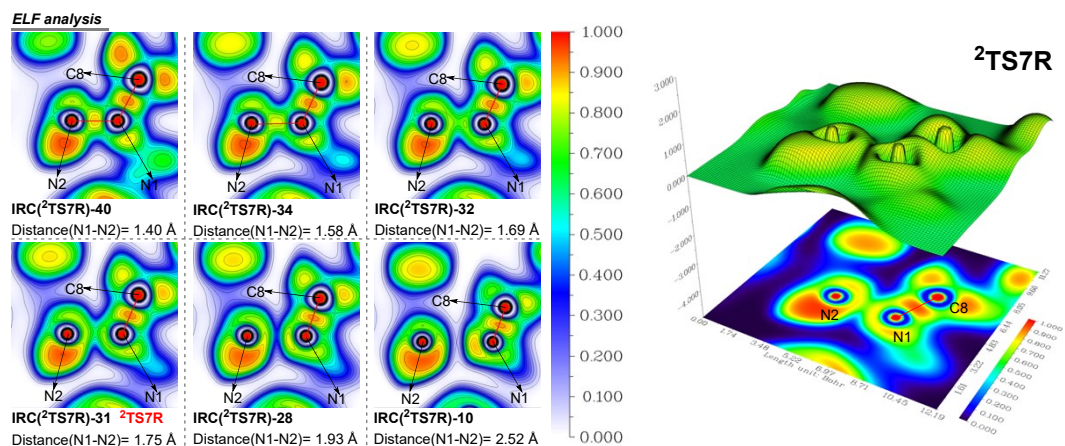

**Figure S8.** ELF analysis graphs in a selected plane along the IRC results of transition state <sup>2</sup>TS7R.

## Part 12: The Colorbar Scale of NCI Plots

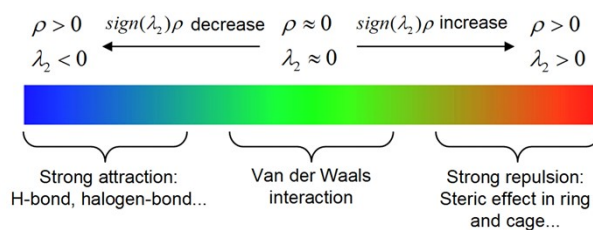

**Figure S9.** The colorbar scale for the NCI analysis of Figures 2a and 8a. (The symbol  $\rho$ ,  $\lambda_2$  and  $\text{sign}(\lambda_2)\rho$  represent electron density, the second largest eigenvalue of the electron density Hessian matrix and  $\text{sign}(\lambda_2)$  is multiplied by  $\rho$ .<sup>8)</sup>

It is worth mentioning that the program for mapping non-covalent interactions also has NCIPLOT,<sup>9-10</sup> which is also very good software. According to the application of Multiwfn and NCIPLOT in NCI analysis by our research group in the past few years, the results obtained by the two methods are almost the same.<sup>11-12</sup> Herein, we just used the Multiwfn software to examine the interactions between molecular fragments.

## Part 13: Summary of Absolute SPE, GFEC, and GFE of the

## Optimized Structures

**Table S3.** The single-point energies (SPE) at M06-2X/6-311++G(d,p)/IEF-PCM<sub>HFB</sub> level, Gibbs free energy corrections (GFEC) at M06-2X/6-31G(d,p)/IEF-PCM<sub>HFB</sub> level, and Gibbs free energies (GFE = SPE + GFEC) of the stationary points involved in the reaction models.

|                              | SPE (a.u.)   | GFEC (a.u.) | GFE (a.u.)   |
|------------------------------|--------------|-------------|--------------|
| Pre-NHC                      | -1394.277857 | 0.259122    | -1394.018735 |
| PivO <sup>-</sup>            | -346.468105  | 0.102946    | -346.365159  |
| NHC                          | -1393.841079 | 0.245152    | -1393.595927 |
| <b>R1</b>                    | -422.902429  | 0.110316    | -422.792113  |
| <b>R2</b>                    | -1393.154859 | 0.298728    | -1392.856131 |
| PivOH                        | -346.982608  | 0.116408    | -346.866200  |
| <b>TS1</b>                   | -1816.739803 | 0.377056    | -1816.362747 |
| <b>M1</b>                    | -1816.745827 | 0.379492    | -1816.366335 |
| H <sub>2</sub> O             | -76.424142   | 0.004034    | -76.420108   |
| MeOH                         | -115.70664   | 0.029539    | -115.677101  |
| <b>M02<sup>H</sup></b>       | -1893.194118 | 0.403192    | -1892.790926 |
| <b>M02<sup>M</sup></b>       | -1932.475516 | 0.430184    | -1932.045332 |
| <b>M02<sup>P</sup></b>       | -2163.784426 | 0.519327    | -2163.265099 |
| <b>TS2<sup>H</sup></b>       | -1893.160687 | 0.40009     | -1892.760597 |
| <b>TS2<sup>M</sup></b>       | -1932.445308 | 0.425770    | -1932.019538 |
| <b>TS2<sup>P</sup></b>       | -2163.757446 | 0.516542    | -2163.240904 |
| <b>M2</b>                    | -1816.769159 | 0.379668    | -1816.389491 |
| <b>M3<sup>+</sup></b>        | -1816.58523  | 0.380612    | -1816.204618 |
| <b>M3<sup>-</sup></b>        | -1816.253747 | 0.366432    | -1815.887315 |
| <b>R2 + PivO<sup>-</sup></b> | -1739.698496 | 0.421211    | -1739.277285 |
| <b>M3</b>                    | -3556.508242 | 0.830684    | -3555.677558 |
| <sup>os</sup> <b>TS3</b>     | -3556.500964 | 0.827084    | -3555.673880 |
| <sup>2</sup> <b>R2</b>       | -1393.310169 | 0.293109    | -1393.017060 |
| <sup>2</sup> <b>TS4</b>      | -1393.293537 | 0.290231    | -1393.003306 |
| <sup>2</sup> <b>Nts</b>      | -914.05147   | 0.130555    | -913.920915  |
| <b>Pyd</b>                   | -479.260191  | 0.137066    | -479.123125  |
| <sup>2</sup> <b>M4</b>       | -1816.167570 | 0.369056    | -1815.798514 |
| <sup>2</sup> <b>TS5R</b>     | -3209.339624 | 0.69198     | -3208.647644 |
| <sup>2</sup> <b>TS5S</b>     | -3209.343458 | 0.697269    | -3208.646189 |
| <sup>2</sup> <b>M5R</b>      | -3209.347807 | 0.694887    | -3208.65292  |
| <sup>2</sup> <b>M5S</b>      | -3209.35095  | 0.69918     | -3208.65177  |
| <sup>2</sup> <b>TS6R</b>     | -3209.318914 | 0.691592    | -3208.627322 |
| <sup>2</sup> <b>TS6S</b>     | -3209.309715 | 0.686876    | -3208.622839 |
| <sup>2</sup> <b>M6R</b>      | -3209.348783 | 0.693388    | -3208.655395 |
| <sup>2</sup> <b>M6S</b>      | -3209.345923 | 0.691545    | -3208.654378 |

|                                     |              |          |              |
|-------------------------------------|--------------|----------|--------------|
| <b><sup>2</sup>TS7R</b>             | -3209.324535 | 0.690477 | -3208.634058 |
| <b>M7R</b>                          | -2295.291802 | 0.535133 | -2294.756669 |
| <b>TS8R</b>                         | -2295.179588 | 0.532719 | -2294.646869 |
| <b>TS8R<sup>H</sup></b>             | -2371.674113 | 0.555526 | -2371.118587 |
| <b>TS8R<sup>M</sup></b>             | -2410.965646 | 0.580366 | -2410.385280 |
| <b>TS8R<sup>P</sup></b>             | -2642.262077 | 0.668773 | -2641.593304 |
| <b>M8R</b>                          | -2295.291591 | 0.532263 | -2294.759328 |
| MeOH + PivO <sup>-</sup>            | -462.197708  | 0.150463 | -462.047245  |
| <b>M09R</b>                         | -2757.583440 | 0.711834 | -2756.871606 |
| <b>TS9R</b>                         | -2757.578414 | 0.710202 | -2756.868212 |
| <b>M9R</b>                          | -2410.580600 | 0.577283 | -2410.003317 |
| <b>TS10R</b>                        | -2410.578037 | 0.575293 | -2410.002744 |
| <b>PR</b>                           | -1016.746557 | 0.302189 | -1016.444368 |
| <b><sup>2</sup>M10</b>              | -478.984794  | 0.135747 | -478.849047  |
| <b><sup>2</sup>M14R</b>             | -2294.983562 | 0.537001 | -2294.446561 |
| Nts <sup>-</sup>                    | -914.200777  | 0.133965 | -914.066812  |
| <b><sup>0s</sup>TS11</b>            | -3632.330441 | 0.765226 | -3631.565215 |
| <b>M11</b>                          | -3632.382087 | 0.771478 | -3631.610609 |
| <b><sup>0s</sup>TS12</b>            | -3209.47981  | 0.688998 | -3208.790812 |
| <b>M12</b>                          | -3209.523865 | 0.694584 | -3208.829281 |
| <b><sup>2</sup>TS13</b>             | -2295.384792 | 0.528167 | -2294.856625 |
| <b><sup>2</sup>M13</b>              | -2295.392729 | 0.530547 | -2294.862182 |
| <b><sup>2</sup>TS5<sup>C2</sup></b> | -3209.323658 | 0.692565 | -3208.631093 |
| <b><sup>2</sup>M5<sup>C2</sup></b>  | -3209.331672 | 0.694327 | -3208.637345 |
| <b><sup>2</sup>M5<sup>C3</sup></b>  | -3209.304816 | 0.692287 | -3208.612529 |
| <b><sup>2</sup>M5<sup>C3</sup></b>  | -3209.305456 | 0.694615 | -3208.610841 |

## Part 14: The Cartesian Coordinates, and Frequencies of the

### Stationary Points

Pre-NHC

Zero-point correction=0.304941

Thermal correction to Energy=0.321763

Thermal correction to Enthalpy=0.322707

Thermal correction to Gibbs Free Energy=0.259122

Sum of electronic and zero-point Energies=-1393.726910

Sum of electronic and thermal Energies=-1393.710088

Sum of electronic and thermal Enthalpies=-1393.709143

Sum of electronic and thermal Free Energies=-1393.772728

Cartesian coordinate

|    |             |             |             |
|----|-------------|-------------|-------------|
| C  | 3.74316600  | 0.67364600  | 0.61147500  |
| C  | 3.02387000  | 0.84520900  | -0.57544400 |
| C  | 2.85548700  | 2.09755100  | -1.15483100 |
| C  | 3.40850400  | 3.20196800  | -0.50911400 |
| C  | 4.11841000  | 3.03974700  | 0.68162100  |
| C  | 4.29770100  | 1.77734900  | 1.24762000  |
| C  | 3.80537900  | -0.78390000 | 1.00206900  |
| C  | 3.46345600  | -1.48302600 | -0.33247800 |
| C  | 2.53205000  | -0.48827900 | -1.06583800 |
| H  | 2.33320300  | 2.21514200  | -2.10080800 |
| H  | 3.30107400  | 4.19036100  | -0.94220200 |
| H  | 4.55141600  | 3.90829100  | 1.16657800  |
| H  | 4.86798700  | 1.66156000  | 2.16388500  |
| H  | 3.06415100  | -1.00315100 | 1.78069400  |
| H  | 4.37257200  | -1.56197600 | -0.93246800 |
| H  | 4.77962600  | -1.09447400 | 1.38379700  |
| H  | 2.52450500  | -0.62089900 | -2.14923300 |
| N  | 1.14775900  | -0.76344800 | -0.58363700 |
| O  | 2.93947200  | -2.79028100 | -0.27852300 |
| C  | 0.05123300  | -0.01287300 | -0.72347400 |
| C  | 0.76408900  | -1.88916100 | 0.09450200  |
| N  | -0.93772600 | -0.67322600 | -0.13962900 |
| N  | -0.51091800 | -1.85217500 | 0.37510800  |
| C  | 1.76215500  | -2.94067100 | 0.47667800  |
| H  | 1.95051900  | -2.87992900 | 1.55608700  |
| H  | 1.35509200  | -3.92886300 | 0.25683300  |
| C  | -2.31155000 | -0.28049700 | -0.03515600 |
| C  | -2.62305200 | 1.06223400  | 0.14453100  |
| C  | -3.29003800 | -1.26373700 | -0.12469700 |
| C  | -3.95900800 | 1.43651100  | 0.21149300  |
| C  | -4.62332300 | -0.88622500 | -0.04545300 |
| C  | -4.94687300 | 0.45968700  | 0.11370400  |
| H  | -4.23315300 | 2.47491800  | 0.35510600  |
| H  | -5.40949700 | -1.62856900 | -0.11600000 |
| H  | -3.01009300 | -2.30245000 | -0.25626200 |
| H  | -1.84246100 | 1.80700300  | 0.26065300  |
| Cl | -6.61314700 | 0.92789200  | 0.19777200  |
| H  | -0.02096200 | 0.93986400  | -1.22673200 |

#### Variable frequencies

|          |          |          |
|----------|----------|----------|
| 30.9930  | 46.5084  | 52.0525  |
| 76.4534  | 91.1057  | 148.3426 |
| 156.4714 | 175.8098 | 229.7464 |
| 248.3480 | 266.4864 | 279.4223 |

|           |           |           |
|-----------|-----------|-----------|
| 301.6760  | 321.4962  | 355.4895  |
| 394.3203  | 415.9579  | 424.6826  |
| 446.8729  | 459.0259  | 495.7594  |
| 497.3166  | 533.7432  | 544.5879  |
| 580.0315  | 605.3866  | 613.4431  |
| 635.6596  | 646.5850  | 682.0718  |
| 702.8042  | 722.1904  | 729.9271  |
| 764.8851  | 787.1066  | 800.1209  |
| 817.1990  | 844.8450  | 847.4373  |
| 858.1408  | 885.0873  | 895.0612  |
| 898.8640  | 919.2387  | 981.3256  |
| 982.2819  | 995.5994  | 1004.0969 |
| 1006.0465 | 1033.1077 | 1038.2087 |
| 1045.4499 | 1052.7970 | 1063.0725 |
| 1095.3798 | 1120.0210 | 1134.4434 |
| 1141.0807 | 1150.4552 | 1166.2764 |
| 1183.4185 | 1187.9032 | 1203.9952 |
| 1214.2300 | 1230.9798 | 1239.4306 |
| 1255.0409 | 1268.8044 | 1277.2470 |
| 1306.5628 | 1317.6404 | 1326.3559 |
| 1332.9397 | 1342.6638 | 1356.9267 |
| 1360.2926 | 1375.5328 | 1383.7085 |
| 1420.7604 | 1443.9965 | 1468.4461 |
| 1493.1119 | 1499.4575 | 1508.0616 |
| 1522.7255 | 1536.9859 | 1553.2386 |
| 1611.4237 | 1663.6391 | 1681.7838 |
| 1685.4098 | 1690.2725 | 1704.5051 |
| 3076.0221 | 3086.4798 | 3150.4659 |
| 3153.8656 | 3162.3976 | 3173.4418 |
| 3199.8199 | 3210.3339 | 3224.2180 |
| 3231.0152 | 3236.8994 | 3242.6325 |
| 3246.8194 | 3251.8137 | 3321.4419 |

PivO<sup>-</sup>

Zero-point correction=0.134599

Thermal correction to Energy=0.142515

Thermal correction to Enthalpy=0.143459

Thermal correction to Gibbs Free Energy=0.102946

Sum of electronic and zero-point Energies=-346.216578

Sum of electronic and thermal Energies=-346.208662

Sum of electronic and thermal Enthalpies=-346.207718

Sum of electronic and thermal Free Energies=-346.248231



#### Cartesian coordinate

|   |             |             |             |
|---|-------------|-------------|-------------|
| C | -0.52298600 | 0.01396700  | -0.00751200 |
| C | -0.98613200 | -0.73266000 | -1.26027500 |
| H | -2.07765600 | -0.85990400 | -1.27212300 |
| H | -0.70053300 | -0.18494200 | -2.16608600 |
| H | -0.50752300 | -1.71380200 | -1.29386000 |
| C | -1.09755200 | 1.42640000  | 0.00686800  |
| H | -2.19617800 | 1.40492400  | 0.02820300  |
| H | -0.73517200 | 1.97563800  | 0.87932500  |
| H | -0.77750700 | 1.98297500  | -0.87909700 |
| C | -0.98867000 | -0.75507700 | 1.23249800  |
| H | -0.52459900 | -1.74454900 | 1.24027600  |
| H | -0.68774300 | -0.23005900 | 2.14676200  |
| H | -2.08139900 | -0.86902500 | 1.25028600  |
| C | 1.05180600  | 0.02723900  | 0.01453600  |
| O | 1.58467600  | -1.10478700 | -0.07783900 |
| O | 1.60720800  | 1.14192800  | 0.13805300  |

#### Variable frequencies

|           |           |           |
|-----------|-----------|-----------|
| 74.2984   | 219.0092  | 241.8251  |
| 245.5994  | 275.1748  | 300.9180  |
| 342.6178  | 365.2737  | 389.2476  |
| 530.8478  | 590.5331  | 805.2332  |
| 810.0972  | 887.4802  | 941.4321  |
| 953.2214  | 959.1641  | 1043.0815 |
| 1046.8718 | 1254.3486 | 1259.6832 |
| 1285.0764 | 1376.6702 | 1385.9654 |
| 1397.5850 | 1449.4796 | 1479.4705 |
| 1493.1140 | 1497.3831 | 1504.0573 |
| 1511.3774 | 1535.0612 | 1771.5749 |
| 3026.2107 | 3028.3620 | 3035.0041 |
| 3100.8206 | 3103.6226 | 3119.5843 |
| 3140.8736 | 3148.5860 | 3156.4574 |

#### **NHC**

Zero-point correction=0.291615

Thermal correction to Energy=0.308438

Thermal correction to Enthalpy=0.309382

Thermal correction to Gibbs Free Energy=0.245152

Sum of electronic and zero-point Energies=-1393.294363

Sum of electronic and thermal Energies=-1393.277540

Sum of electronic and thermal Enthalpies=-1393.276596

Sum of electronic and thermal Free Energies=-1393.340827

Cartesian coordinate

|    |             |             |             |
|----|-------------|-------------|-------------|
| C  | 3.86447000  | 0.60313700  | 0.58249200  |
| C  | 3.01229800  | 0.88374800  | -0.48761400 |
| C  | 2.75593700  | 2.19029100  | -0.88380200 |
| C  | 3.38139700  | 3.22780400  | -0.19538800 |
| C  | 4.24346200  | 2.95288400  | 0.86784500  |
| C  | 4.49027100  | 1.64003200  | 1.26604900  |
| C  | 3.94224900  | -0.88297100 | 0.83095700  |
| C  | 3.43376700  | -1.46103400 | -0.50839600 |
| C  | 2.46309900  | -0.39264700 | -1.07511000 |
| H  | 2.07434000  | 2.39163200  | -1.70388300 |
| H  | 3.19955100  | 4.25675000  | -0.48810900 |
| H  | 4.72797000  | 3.77188400  | 1.39000800  |
| H  | 5.16049900  | 1.43211600  | 2.09487000  |
| H  | 3.28426800  | -1.16009000 | 1.66356900  |
| H  | 4.27871600  | -1.52570600 | -1.19864900 |
| H  | 4.94555700  | -1.24004800 | 1.07415000  |
| H  | 2.44262600  | -0.39384600 | -2.16763300 |
| N  | 1.10423300  | -0.67759900 | -0.60379000 |
| O  | 2.89054500  | -2.76335200 | -0.47294200 |
| C  | 0.02221900  | 0.13787300  | -0.78207700 |
| C  | 0.74532100  | -1.84030500 | 0.03020500  |
| N  | -0.93578500 | -0.62400900 | -0.20149900 |
| N  | -0.52183500 | -1.83955500 | 0.29977400  |
| C  | 1.74785600  | -2.90603700 | 0.34533300  |
| H  | 2.00913800  | -2.87239500 | 1.41134600  |
| H  | 1.32372100  | -3.88922900 | 0.13456200  |
| C  | -2.30676700 | -0.26951100 | -0.08755000 |
| C  | -2.72681300 | 0.98394500  | -0.53179500 |
| C  | -3.21637200 | -1.16859800 | 0.46368600  |
| C  | -4.06477100 | 1.33791800  | -0.42522800 |
| C  | -4.55635400 | -0.81249500 | 0.57137300  |
| C  | -4.96982900 | 0.43658000  | 0.12616600  |
| H  | -4.40573400 | 2.30814400  | -0.76769900 |
| H  | -5.27510700 | -1.50306100 | 0.99741300  |
| H  | -2.87173700 | -2.13640200 | 0.80460100  |
| H  | -1.99747500 | 1.66347600  | -0.95504300 |
| Cl | -6.65386100 | 0.88400300  | 0.25822100  |

Variable frequencies

|          |          |          |
|----------|----------|----------|
| 25.7704  | 31.3975  | 56.3246  |
| 60.5252  | 90.2629  | 136.0009 |
| 155.7083 | 174.9749 | 230.3635 |

|           |           |           |
|-----------|-----------|-----------|
| 243.6445  | 266.7787  | 278.6435  |
| 308.8710  | 335.5817  | 363.0101  |
| 383.7320  | 409.4048  | 423.8249  |
| 446.0971  | 465.7603  | 495.0992  |
| 527.7833  | 535.7677  | 540.6044  |
| 579.7609  | 609.0355  | 621.2720  |
| 642.5454  | 645.6855  | 663.0510  |
| 691.8784  | 722.2687  | 729.9871  |
| 759.2128  | 778.1467  | 804.8559  |
| 826.6590  | 851.1220  | 863.5339  |
| 871.8260  | 889.7738  | 901.5136  |
| 913.9998  | 972.9194  | 992.0877  |
| 993.4662  | 1006.2658 | 1009.0199 |
| 1020.3680 | 1027.9058 | 1033.4273 |
| 1056.1537 | 1067.1721 | 1095.3693 |
| 1109.2814 | 1131.0245 | 1134.7757 |
| 1138.3669 | 1164.1249 | 1182.3005 |
| 1192.7365 | 1196.9672 | 1201.0453 |
| 1235.7387 | 1246.0870 | 1262.5196 |
| 1273.5825 | 1280.1234 | 1308.9565 |
| 1322.3209 | 1323.3412 | 1343.7899 |
| 1345.9681 | 1352.9726 | 1371.4157 |
| 1373.5408 | 1386.1693 | 1422.8612 |
| 1432.5877 | 1474.1504 | 1482.4395 |
| 1493.9239 | 1513.5504 | 1522.5892 |
| 1541.8309 | 1560.5856 | 1677.9797 |
| 1682.6515 | 1695.0748 | 1703.3545 |
| 1707.6525 | 3066.2202 | 3078.0850 |
| 3119.7872 | 3128.7027 | 3141.5156 |
| 3161.2849 | 3203.4363 | 3210.0319 |
| 3224.2186 | 3235.7538 | 3241.4494 |
| 3248.7558 | 3264.9741 | 3265.5408 |

## R1

Zero-point correction=0.144883

Thermal correction to Energy=0.153491

Thermal correction to Enthalpy=0.154435

Thermal correction to Gibbs Free Energy=0.110316

Sum of electronic and zero-point Energies=-422.650967

Sum of electronic and thermal Energies=-422.642360

Sum of electronic and thermal Enthalpies=-422.641416

Sum of electronic and thermal Free Energies=-422.685535

Cartesian coordinate

|   |             |             |             |
|---|-------------|-------------|-------------|
| C | -1.05324700 | -0.25667900 | -0.00002300 |
| C | -1.97311200 | 0.72128900  | -0.00001300 |
| H | -1.43440900 | -1.27793800 | -0.00005300 |
| C | -3.41010300 | 0.38276700  | -0.00004400 |
| O | -3.84579100 | -0.75013800 | -0.00005400 |
| C | 0.40412500  | -0.11137600 | 0.00000100  |
| C | 1.19374300  | -1.26866600 | -0.00002500 |
| C | 1.04224400  | 1.13794900  | 0.00004900  |
| C | 2.58188900  | -1.18533400 | -0.00000400 |
| H | 0.70729700  | -2.24025700 | -0.00006200 |
| C | 2.42713700  | 1.22184400  | 0.00006900  |
| H | 0.45216900  | 2.04881300  | 0.00007000  |
| C | 3.20158800  | 0.06069300  | 0.00004300  |
| H | 3.17839200  | -2.09160200 | -0.00002400 |
| H | 2.90810300  | 2.19461200  | 0.00010800  |
| H | 4.28450700  | 0.13048300  | 0.00006000  |
| H | -4.10315000 | 1.24658700  | -0.00000600 |
| H | -1.71216600 | 1.77548400  | 0.00001500  |

Variable frequencies

|           |           |           |
|-----------|-----------|-----------|
| 46.4376   | 87.0999   | 127.4388  |
| 218.8028  | 243.7587  | 286.0069  |
| 412.1627  | 412.6165  | 501.9407  |
| 563.5553  | 629.1688  | 704.5747  |
| 733.1459  | 766.4182  | 859.9312  |
| 877.5717  | 894.7766  | 949.7843  |
| 998.5671  | 1014.8813 | 1018.7575 |
| 1025.0643 | 1041.2423 | 1055.3911 |
| 1072.9839 | 1120.6407 | 1182.7342 |
| 1206.8738 | 1238.1352 | 1321.8617 |
| 1329.3066 | 1360.5989 | 1370.7084 |
| 1446.8002 | 1504.8303 | 1554.0341 |
| 1670.6309 | 1698.9806 | 1712.6017 |
| 1843.0074 | 3002.4833 | 3181.4869 |
| 3194.7207 | 3201.7932 | 3218.1193 |
| 3221.3983 | 3234.0065 | 3238.6373 |

**R2**

Zero-point correction=0.349430

Thermal correction to Energy=0.370516

Thermal correction to Enthalpy=0.371460

Thermal correction to Gibbs Free Energy=0.298728

Sum of electronic and zero-point Energies=-1392.542902  
Sum of electronic and thermal Energies=-1392.521816  
Sum of electronic and thermal Enthalpies=-1392.520872  
Sum of electronic and thermal Free Energies=-1392.593604

Cartesian coordinate

|   |             |             |             |
|---|-------------|-------------|-------------|
| S | -0.05312800 | -1.52734200 | -0.67309200 |
| O | 0.02206300  | -2.97837200 | -0.61751800 |
| O | 0.58143200  | -0.78185700 | -1.74421300 |
| N | 0.72060100  | -0.89937200 | 0.76381200  |
| N | 2.07726500  | -0.65686000 | 0.49303300  |
| C | -2.67822000 | -1.92788900 | -0.08840200 |
| H | -2.42403800 | -2.98102300 | -0.03139500 |
| C | -3.97665700 | -1.47952600 | 0.12520400  |
| H | -4.75717900 | -2.19695000 | 0.35799100  |
| C | -1.69975800 | -0.98656700 | -0.39157400 |
| C | -1.97541600 | 0.37790600  | -0.48715900 |
| H | -1.18942100 | 1.08652300  | -0.73420300 |
| C | -4.29292900 | -0.12030400 | 0.03919500  |
| C | -3.27714500 | 0.79774600  | -0.26490900 |
| H | -3.51418300 | 1.85554700  | -0.33108300 |
| C | -5.70576600 | 0.35452700  | 0.24073700  |
| H | -5.72897700 | 1.30108400  | 0.78528700  |
| H | -6.29825800 | -0.37941400 | 0.78942700  |
| H | -6.18842000 | 0.51956500  | -0.72773400 |
| C | 2.94543000  | -1.69771700 | 0.43879000  |
| H | 2.53118600  | -2.67236100 | 0.66735300  |
| C | 2.42546100  | 0.61667400  | 0.16051700  |
| C | 3.74739300  | 0.84229500  | -0.21650700 |
| H | 4.03549900  | 1.85595700  | -0.46728900 |
| C | 4.25651600  | -1.49141400 | 0.08272000  |
| H | 4.93643500  | -2.33298600 | 0.05128700  |
| C | 4.66299300  | -0.19844200 | -0.25247300 |
| H | 5.69057400  | -0.00770300 | -0.54194800 |
| C | 0.46095900  | -1.66024200 | 1.99138800  |
| H | -0.61704600 | -1.62275500 | 2.15828000  |
| H | 0.77278700  | -2.70740400 | 1.93178200  |
| H | 0.96081200  | -1.15503700 | 2.81882300  |
| C | 1.41895300  | 1.69873500  | 0.17305300  |
| C | 0.67296400  | 2.00105800  | 1.31757100  |
| C | 1.24853800  | 2.44339400  | -0.99683200 |
| C | -0.23891700 | 3.04785000  | 1.28547700  |
| H | 0.81494800  | 1.42897900  | 2.22902900  |
| C | 0.32048700  | 3.48101100  | -1.02581900 |

|   |             |            |             |
|---|-------------|------------|-------------|
| H | 1.81420600  | 2.18724500 | -1.88733000 |
| C | -0.42025300 | 3.78374300 | 0.11384400  |
| H | -0.80969000 | 3.29096000 | 2.17491000  |
| H | 0.17761000  | 4.04822400 | -1.93888700 |
| H | -1.13761900 | 4.59744400 | 0.09215900  |

Variable frequencies

|           |           |           |
|-----------|-----------|-----------|
| 32.0687   | 37.4839   | 55.0545   |
| 60.9695   | 63.4359   | 74.9506   |
| 80.3561   | 92.7415   | 110.9930  |
| 146.9896  | 175.8362  | 191.2499  |
| 205.6215  | 240.8499  | 260.1061  |
| 275.9332  | 290.3793  | 307.0332  |
| 323.6611  | 331.5994  | 349.2013  |
| 379.9564  | 412.7072  | 413.1150  |
| 430.8420  | 456.8223  | 486.2176  |
| 509.7985  | 519.1793  | 554.4775  |
| 568.0797  | 581.6865  | 591.3926  |
| 623.4423  | 640.4338  | 641.8811  |
| 673.1901  | 700.7210  | 714.4024  |
| 718.2552  | 757.8334  | 765.0753  |
| 797.0502  | 802.4005  | 828.4032  |
| 836.7398  | 852.3540  | 862.6725  |
| 885.7930  | 907.9486  | 968.4932  |
| 984.4582  | 992.6215  | 1002.1772 |
| 1014.4725 | 1016.2473 | 1017.4331 |
| 1033.4139 | 1038.9712 | 1052.4786 |
| 1056.0796 | 1064.9794 | 1080.1368 |
| 1085.0437 | 1110.2481 | 1118.8041 |
| 1125.6066 | 1145.3298 | 1150.8648 |
| 1168.9933 | 1183.1924 | 1188.8475 |
| 1192.4378 | 1213.1706 | 1213.8023 |
| 1218.7740 | 1255.7075 | 1270.3581 |
| 1312.1775 | 1319.4897 | 1334.6482 |
| 1344.3997 | 1350.7194 | 1362.2801 |
| 1363.1916 | 1388.8712 | 1424.1774 |
| 1458.2724 | 1461.8269 | 1481.7256 |
| 1497.3040 | 1498.8579 | 1502.7451 |
| 1508.8863 | 1521.2747 | 1538.5780 |
| 1548.0926 | 1570.4295 | 1653.6374 |
| 1667.2024 | 1671.5910 | 1686.8551 |
| 1692.7341 | 1707.5237 | 3077.2115 |
| 3083.0440 | 3150.6177 | 3171.4344 |
| 3172.5230 | 3201.7487 | 3210.2919 |

|           |           |           |
|-----------|-----------|-----------|
| 3211.5244 | 3215.4756 | 3217.0230 |
| 3223.4431 | 3226.7747 | 3239.0748 |
| 3241.7492 | 3246.5025 | 3247.0313 |
| 3260.2346 | 3264.9380 | 3271.5789 |

PivOH

Zero-point correction=0.148507  
 Thermal correction to Energy=0.156633  
 Thermal correction to Enthalpy=0.157577  
 Thermal correction to Gibbs Free Energy=0.116408  
 Sum of electronic and zero-point Energies=-346.735308  
 Sum of electronic and thermal Energies=-346.727183  
 Sum of electronic and thermal Enthalpies=-346.726239  
 Sum of electronic and thermal Free Energies=-346.767408

Cartesian coordinate

|   |             |             |             |
|---|-------------|-------------|-------------|
| C | -0.93702200 | 0.18477000  | 0.00015200  |
| O | -1.51386800 | 1.24555200  | 0.00002500  |
| O | -1.60211000 | -0.98777800 | 0.00005000  |
| H | -2.54780900 | -0.77341100 | -0.00011600 |
| C | 0.57131300  | -0.00982300 | 0.00000200  |
| C | 0.96247400  | -0.80247600 | -1.25675000 |
| H | 2.04744500  | -0.94261200 | -1.27300000 |
| H | 0.48403000  | -1.78443000 | -1.26647600 |
| H | 0.67538000  | -0.26534500 | -2.16580700 |
| C | 1.24360000  | 1.36129100  | 0.00014700  |
| H | 0.95638700  | 1.93720300  | 0.88323900  |
| H | 2.33033000  | 1.23705400  | 0.00004200  |
| H | 0.95625300  | 1.93746300  | -0.88273200 |
| C | 0.96266900  | -0.80282900 | 1.25646000  |
| H | 2.04763400  | -0.94304600 | 1.27243800  |
| H | 0.67580400  | -0.26591500 | 2.16571600  |
| H | 0.48416300  | -1.78475700 | 1.26603100  |

Variable frequencies

|           |           |           |
|-----------|-----------|-----------|
| 45.7239   | 208.5320  | 257.8120  |
| 267.9859  | 283.2363  | 301.3971  |
| 348.2690  | 367.0916  | 378.9746  |
| 518.6999  | 582.0651  | 603.7414  |
| 746.4557  | 793.4403  | 890.8875  |
| 962.6364  | 968.2105  | 970.1887  |
| 1056.4194 | 1056.7937 | 1182.5233 |
| 1256.8835 | 1262.9183 | 1292.9393 |

|           |           |           |
|-----------|-----------|-----------|
| 1393.3261 | 1403.6970 | 1423.5717 |
| 1445.3876 | 1490.3021 | 1498.0399 |
| 1499.1481 | 1513.6195 | 1515.9769 |
| 1535.3544 | 1881.4491 | 3064.5755 |
| 3066.5731 | 3077.8904 | 3145.6687 |
| 3146.6994 | 3159.6586 | 3159.6763 |
| 3162.2802 | 3171.6079 | 3828.7872 |

## TS1

Zero-point correction=0.437375

Thermal correction to Energy=0.463363

Thermal correction to Enthalpy=0.464308

Thermal correction to Gibbs Free Energy=0.377056

Sum of electronic and zero-point Energies=-1815.943961

Sum of electronic and thermal Energies=-1815.917972

Sum of electronic and thermal Enthalpies=-1815.917028

Sum of electronic and thermal Free Energies=-1816.004279

### Cartesian coordinate

|   |             |             |             |
|---|-------------|-------------|-------------|
| C | -4.74020000 | 0.29390700  | -0.30386100 |
| C | -3.41239500 | 0.42067100  | 0.09269000  |
| C | -2.64329300 | 1.52124100  | -0.26584700 |
| C | -3.23158500 | 2.50460300  | -1.05714900 |
| C | -4.56222100 | 2.38355900  | -1.46622600 |
| C | -5.32782800 | 1.28154900  | -1.08975600 |
| C | -5.34505700 | -0.97503600 | 0.24420500  |
| C | -4.14318200 | -1.80188900 | 0.75788500  |
| C | -2.97471100 | -0.76453800 | 0.92146100  |
| H | -1.61676700 | 1.59932000  | 0.08070100  |
| H | -2.65334500 | 3.37317400  | -1.35554800 |
| H | -5.00532800 | 3.15783700  | -2.08479000 |
| H | -6.36189800 | 1.19337200  | -1.41000700 |
| H | -5.90506600 | -1.55384300 | -0.49670900 |
| H | -4.35846000 | -2.28325300 | 1.71267200  |
| H | -6.03072300 | -0.75157200 | 1.06875100  |
| H | -2.80170500 | -0.48149100 | 1.96003600  |
| N | -1.71555100 | -1.32445800 | 0.41406000  |
| O | -3.83574400 | -2.88356600 | -0.11440100 |
| C | -0.43965300 | -1.13617600 | 0.81379700  |
| C | -1.72255900 | -2.11523300 | -0.70571300 |
| N | 0.25535500  | -1.85238000 | -0.08850900 |
| N | -0.52079800 | -2.46828400 | -1.04113400 |
| C | -3.05031900 | -2.53761400 | -1.24008500 |



|    |             |             |             |
|----|-------------|-------------|-------------|
| H  | -3.51101900 | -1.73275900 | -1.82927700 |
| H  | -2.94554200 | -3.42587300 | -1.86311300 |
| C  | 1.66681700  | -2.02469900 | -0.13411300 |
| C  | 2.38850700  | -2.10239300 | 1.05342300  |
| C  | 2.29975800  | -2.11162800 | -1.36994200 |
| C  | 3.77100900  | -2.23730900 | 1.00537700  |
| C  | 3.68010800  | -2.26306400 | -1.41877100 |
| C  | 4.40324300  | -2.31589600 | -0.23114700 |
| H  | 4.35171800  | -2.29187600 | 1.91875500  |
| H  | 4.19374900  | -2.33264700 | -2.37058000 |
| H  | 1.71130800  | -2.06178900 | -2.27850500 |
| H  | 1.87111200  | -2.05738300 | 2.00628000  |
| Cl | 6.13561000  | -2.49279700 | -0.29396400 |
| C  | 0.78359300  | 2.28734200  | 1.14536300  |
| C  | 0.96390600  | 0.98172300  | 1.36181900  |
| H  | -0.12305700 | 2.72740400  | 1.56047900  |
| C  | -0.06298900 | 0.18928600  | 2.14111700  |
| O  | -1.14689400 | 0.73767400  | 2.46946900  |
| C  | 1.70072100  | 3.18873700  | 0.43002300  |
| C  | 1.52464700  | 4.57300900  | 0.54609600  |
| C  | 2.74726700  | 2.71713200  | -0.37569800 |
| C  | 2.37608400  | 5.46160100  | -0.10280300 |
| H  | 0.71189800  | 4.94989900  | 1.16130400  |
| C  | 3.59843600  | 3.60273500  | -1.02398900 |
| H  | 2.88492100  | 1.64735800  | -0.50784000 |
| C  | 3.41853200  | 4.97921900  | -0.88883800 |
| H  | 2.22436100  | 6.53104400  | 0.00522100  |
| H  | 4.40226700  | 3.21952200  | -1.64491300 |
| H  | 4.08362100  | 5.66889000  | -1.39864800 |
| H  | 0.43270200  | -0.50722700 | 2.85352800  |
| H  | 1.86812500  | 0.46740700  | 1.04221100  |

Variable frequencies

|           |          |          |
|-----------|----------|----------|
| -194.4583 | 10.7331  | 16.8574  |
| 21.6464   | 28.4854  | 45.1320  |
| 46.2716   | 51.8831  | 80.5437  |
| 82.8615   | 97.3781  | 108.0374 |
| 135.4257  | 138.9004 | 162.9000 |
| 196.0353  | 215.3400 | 225.7035 |
| 234.7009  | 248.6713 | 260.6125 |
| 290.1527  | 297.2927 | 317.7662 |
| 348.1060  | 373.4523 | 400.0551 |
| 414.5978  | 416.3099 | 422.4957 |
| 429.5629  | 443.0764 | 472.1689 |

|           |           |           |
|-----------|-----------|-----------|
| 487.8287  | 501.7771  | 515.4401  |
| 519.4772  | 527.3750  | 558.7891  |
| 573.5807  | 598.0428  | 606.9581  |
| 627.5210  | 630.1149  | 638.8699  |
| 696.3908  | 708.4700  | 709.4173  |
| 723.6529  | 726.4574  | 732.9006  |
| 733.5922  | 761.6805  | 777.8449  |
| 781.4641  | 807.5585  | 836.4864  |
| 850.6343  | 854.3936  | 862.1437  |
| 866.3391  | 872.0355  | 877.8609  |
| 888.8646  | 894.3145  | 910.5739  |
| 945.6961  | 949.6811  | 969.0406  |
| 979.2595  | 979.4647  | 993.8730  |
| 996.9190  | 1005.1040 | 1014.6427 |
| 1016.3974 | 1017.5731 | 1025.5994 |
| 1033.7025 | 1036.6942 | 1048.7683 |
| 1053.6415 | 1066.2793 | 1071.3347 |
| 1114.0159 | 1115.9111 | 1118.2690 |
| 1131.0281 | 1136.2529 | 1150.2590 |
| 1153.5990 | 1178.3357 | 1180.2243 |
| 1196.4231 | 1198.1845 | 1201.2300 |
| 1217.0810 | 1224.6000 | 1225.2033 |
| 1246.9087 | 1266.1373 | 1276.8537 |
| 1294.5892 | 1301.0267 | 1306.3033 |
| 1310.7434 | 1320.6125 | 1323.9699 |
| 1335.8884 | 1347.3080 | 1347.6549 |
| 1356.0912 | 1363.4845 | 1370.2253 |
| 1375.2057 | 1380.2587 | 1419.8556 |
| 1440.8836 | 1458.9269 | 1480.8414 |
| 1486.3148 | 1493.4339 | 1497.4213 |
| 1502.0765 | 1519.7572 | 1541.1604 |
| 1552.3101 | 1564.7747 | 1584.5160 |
| 1670.3188 | 1681.2339 | 1686.7004 |
| 1692.9978 | 1699.8028 | 1701.6878 |
| 1707.8738 | 1747.9558 | 2906.0331 |
| 3071.9993 | 3079.5594 | 3127.7372 |
| 3152.1119 | 3170.0259 | 3176.9569 |
| 3180.3301 | 3188.9286 | 3191.7256 |
| 3196.0513 | 3197.0154 | 3205.2090 |
| 3211.0750 | 3213.2142 | 3214.6318 |
| 3219.8711 | 3223.0910 | 3234.9385 |
| 3235.0699 | 3245.7327 | 3253.8077 |

**M1**

Zero-point correction=0.438847  
 Thermal correction to Energy=0.464842  
 Thermal correction to Enthalpy=0.465787  
 Thermal correction to Gibbs Free Energy=0.379492  
 Sum of electronic and zero-point Energies=-1815.947028  
 Sum of electronic and thermal Energies=-1815.921033  
 Sum of electronic and thermal Enthalpies=-1815.920089  
 Sum of electronic and thermal Free Energies=-1816.006383

Cartesian coordinate

|   |             |             |             |
|---|-------------|-------------|-------------|
| C | -4.66249500 | 0.32332800  | -0.43760800 |
| C | -3.37411100 | 0.47349500  | 0.06538300  |
| C | -2.59313300 | 1.58394700  | -0.23704300 |
| C | -3.12370000 | 2.54512300  | -1.09288100 |
| C | -4.41131200 | 2.39646800  | -1.61705100 |
| C | -5.19250800 | 1.29108700  | -1.28784400 |
| C | -5.31239100 | -0.93057200 | 0.08897400  |
| C | -4.19006700 | -1.69383900 | 0.83741600  |
| C | -2.98592700 | -0.68469400 | 0.95029500  |
| H | -1.60987400 | 1.68374800  | 0.21473000  |
| H | -2.53567200 | 3.42047600  | -1.35001700 |
| H | -4.80976600 | 3.15452600  | -2.28416000 |
| H | -6.19629200 | 1.18616900  | -1.68920400 |
| H | -5.73496100 | -1.56715500 | -0.69583200 |
| H | -4.50676200 | -1.99329800 | 1.83659000  |
| H | -6.12989100 | -0.68821800 | 0.77527000  |
| H | -2.76208300 | -0.36107700 | 1.96714700  |
| N | -1.74003500 | -1.31358600 | 0.46288100  |
| O | -3.86453500 | -2.92145300 | 0.19859700  |
| C | -0.45220600 | -1.07039400 | 0.76683700  |
| C | -1.76484000 | -2.25448500 | -0.53144600 |
| N | 0.23655400  | -1.89675300 | -0.03578000 |
| N | -0.56893300 | -2.64119100 | -0.85520200 |
| C | -3.09584200 | -2.76166800 | -0.97483200 |
| H | -3.56446500 | -2.06252800 | -1.68209600 |
| H | -2.98879300 | -3.73600100 | -1.45152700 |
| C | 1.65210000  | -2.06765000 | -0.12597300 |
| C | 2.39876300  | -2.31334400 | 1.02058700  |
| C | 2.24727400  | -1.99760200 | -1.38098400 |
| C | 3.77629000  | -2.46606000 | 0.91306700  |
| C | 3.62167600  | -2.16292300 | -1.49100900 |
| C | 4.37298500  | -2.38957800 | -0.34134400 |
| H | 4.38002600  | -2.65554800 | 1.79276600  |

|    |             |             |             |
|----|-------------|-------------|-------------|
| H  | 4.10912200  | -2.10906500 | -2.45727200 |
| H  | 1.63572200  | -1.81222800 | -2.25682100 |
| H  | 1.91164300  | -2.38998900 | 1.98632000  |
| Cl | 6.09666900  | -2.58915700 | -0.47900100 |
| C  | 0.85933800  | 2.22726500  | 1.13680200  |
| C  | 1.01890600  | 0.90487400  | 1.07522900  |
| H  | -0.00802500 | 2.56711900  | 1.70316300  |
| C  | 0.02245700  | -0.00162000 | 1.82295600  |
| O  | -1.00674200 | 0.60131400  | 2.36940400  |
| C  | 1.71164600  | 3.25701500  | 0.52031200  |
| C  | 1.26154700  | 4.58319200  | 0.50663600  |
| C  | 2.95665000  | 2.97542500  | -0.06062200 |
| C  | 2.01778300  | 5.59442300  | -0.07743100 |
| H  | 0.30191700  | 4.81523900  | 0.96120500  |
| C  | 3.71411300  | 3.98341600  | -0.64361100 |
| H  | 3.34033700  | 1.95930100  | -0.04507700 |
| C  | 3.24766800  | 5.29788900  | -0.65743900 |
| H  | 1.64712600  | 6.61477000  | -0.07727900 |
| H  | 4.67694900  | 3.74571700  | -1.08563900 |
| H  | 3.84246800  | 6.08365300  | -1.11209700 |
| H  | 0.65550300  | -0.62281200 | 2.51542900  |
| H  | 1.85553800  | 0.44958000  | 0.54585300  |

#### Variable frequencies

|          |          |          |
|----------|----------|----------|
| 17.3042  | 22.5113  | 24.9977  |
| 26.3991  | 35.9389  | 48.6113  |
| 54.8180  | 83.7041  | 95.4244  |
| 110.6188 | 120.1234 | 121.5129 |
| 151.4361 | 179.0140 | 202.1907 |
| 214.4545 | 224.5543 | 246.5157 |
| 254.9349 | 271.7233 | 294.4336 |
| 302.0194 | 323.2418 | 335.5323 |
| 362.7427 | 380.3634 | 412.6707 |
| 414.4383 | 420.6078 | 433.2037 |
| 442.1949 | 452.3316 | 476.9359 |
| 486.3603 | 511.3728 | 517.6419 |
| 529.0181 | 549.2476 | 562.1010 |
| 593.9595 | 611.3118 | 612.7014 |
| 630.4311 | 644.2898 | 664.5080 |
| 696.8746 | 709.8582 | 718.9105 |
| 723.2357 | 730.3109 | 734.3842 |
| 746.1542 | 770.6413 | 789.8328 |
| 794.9081 | 815.3964 | 836.0972 |
| 846.4788 | 858.2155 | 859.8452 |

|           |           |           |
|-----------|-----------|-----------|
| 869.6595  | 874.2910  | 876.3480  |
| 884.3253  | 900.4642  | 918.7808  |
| 934.7614  | 948.8905  | 956.0941  |
| 977.9043  | 991.6087  | 992.0555  |
| 993.3772  | 1015.6061 | 1017.6558 |
| 1021.5697 | 1024.8241 | 1031.9483 |
| 1048.6475 | 1054.6443 | 1059.5137 |
| 1066.6491 | 1071.2075 | 1071.7171 |
| 1115.7427 | 1124.0927 | 1130.7261 |
| 1137.3369 | 1142.3140 | 1154.5179 |
| 1176.8863 | 1183.4109 | 1196.4078 |
| 1197.9317 | 1200.4792 | 1201.3636 |
| 1222.1943 | 1224.1160 | 1229.7160 |
| 1246.4045 | 1259.3600 | 1280.5032 |
| 1286.7052 | 1296.0848 | 1306.7402 |
| 1313.8653 | 1321.9872 | 1325.5456 |
| 1332.2974 | 1338.9947 | 1347.0218 |
| 1351.8348 | 1358.7814 | 1363.2920 |
| 1373.3498 | 1377.9263 | 1389.0881 |
| 1418.6552 | 1460.6325 | 1467.5848 |
| 1488.7980 | 1500.9953 | 1501.3425 |
| 1508.8973 | 1520.6737 | 1522.0135 |
| 1545.8949 | 1551.6507 | 1571.3376 |
| 1671.5053 | 1681.0578 | 1686.1840 |
| 1692.2031 | 1698.3282 | 1701.5645 |
| 1703.7622 | 1751.4065 | 2753.5026 |
| 3066.7693 | 3077.8232 | 3120.0394 |
| 3152.3029 | 3172.2799 | 3180.0495 |
| 3181.6439 | 3186.5941 | 3191.5929 |
| 3195.0204 | 3205.4352 | 3206.0355 |
| 3211.7003 | 3219.9483 | 3223.0905 |
| 3232.3450 | 3232.7398 | 3234.5814 |
| 3243.1113 | 3243.8498 | 3245.5493 |

H<sub>2</sub>O

Zero-point correction=0.021681

Thermal correction to Energy=0.024516

Thermal correction to Enthalpy=0.025460

Thermal correction to Gibbs Free Energy=0.004034

Sum of electronic and zero-point Energies=-76.365252

Sum of electronic and thermal Energies=-76.362417

Sum of electronic and thermal Enthalpies=-76.361473

Sum of electronic and thermal Free Energies=-76.382899

Cartesian coordinate

|   |             |             |             |
|---|-------------|-------------|-------------|
| O | 0.00000000  | 0.00000000  | 0.11824500  |
| H | -0.00000000 | 0.75920700  | -0.47298200 |
| H | -0.00000000 | -0.75920700 | -0.47298200 |

Variable frequencies

1645.2745      3880.8201      3990.7307

MeOH

Zero-point correction=0.052205

Thermal correction to Energy=0.055443

Thermal correction to Enthalpy=0.056387

Thermal correction to Gibbs Free Energy=0.029539

Sum of electronic and zero-point Energies=-115.613194

Sum of electronic and thermal Energies=-115.609956

Sum of electronic and thermal Enthalpies=-115.609012

Sum of electronic and thermal Free Energies=-115.635860

Cartesian coordinate

|   |             |             |             |
|---|-------------|-------------|-------------|
| C | 0.65975400  | -0.01964700 | 0.00000200  |
| H | 1.08420200  | 0.98619400  | -0.00101200 |
| H | 1.02737000  | -0.54414500 | 0.89137000  |
| H | 1.02721200  | -0.54585500 | -0.89041400 |
| O | -0.74561600 | 0.12259400  | 0.00000400  |
| H | -1.13238000 | -0.75906700 | 0.00001100  |

Variable frequencies

392.4070      1081.8704      1131.3074  
1186.0351      1392.4293      1500.4623  
1510.2404      1530.9443      3037.8864  
3096.8737      3153.0584      3901.8767

**M02<sup>H</sup>**

Zero-point correction=0.464974

Thermal correction to Energy=0.493391

Thermal correction to Enthalpy=0.494336

Thermal correction to Gibbs Free Energy=0.403192

Sum of electronic and zero-point Energies=-1892.337680

Sum of electronic and thermal Energies=-1892.309262

Sum of electronic and thermal Enthalpies=-1892.308318

Sum of electronic and thermal Free Energies=-1892.399462

Cartesian coordinate

|    |             |             |             |
|----|-------------|-------------|-------------|
| C  | -3.43984800 | -1.99486000 | -0.76257300 |
| C  | -2.69583400 | -1.46883800 | 0.29847000  |
| C  | -3.08460700 | -0.30068200 | 0.94036500  |
| C  | -4.20811300 | 0.37277000  | 0.46315100  |
| C  | -4.93625300 | -0.13095400 | -0.61485700 |
| C  | -4.56565600 | -1.32736800 | -1.22870600 |
| C  | -2.86671200 | -3.31188900 | -1.21497400 |
| C  | -2.03132400 | -3.72159400 | 0.01690300  |
| C  | -1.54902200 | -2.38816900 | 0.64982000  |
| H  | -2.49147100 | 0.05138700  | 1.77687500  |
| H  | -4.52121700 | 1.29817700  | 0.93696600  |
| H  | -5.81127500 | 0.40514900  | -0.96950000 |
| H  | -5.15190000 | -1.73421900 | -2.04743200 |
| H  | -2.23859100 | -3.17386900 | -2.10354200 |
| H  | -2.69787700 | -4.18168700 | 0.75043700  |
| H  | -3.62254400 | -4.06119000 | -1.46138600 |
| H  | -1.32991800 | -2.45077800 | 1.71585500  |
| N  | -0.25447500 | -2.02428600 | 0.00911500  |
| O  | -1.01430900 | -4.67142500 | -0.20802400 |
| C  | 0.53368300  | -0.95393200 | 0.23091500  |
| C  | 0.47146600  | -2.89918300 | -0.76171600 |
| N  | 1.65520100  | -1.20369600 | -0.44495600 |
| N  | 1.63824800  | -2.41758900 | -1.06654400 |
| C  | -0.04347600 | -4.25362400 | -1.13600900 |
| H  | -0.43245400 | -4.24338800 | -2.16238000 |
| H  | 0.78216500  | -4.96539700 | -1.09174800 |
| C  | 2.88147900  | -0.46323100 | -0.39417800 |
| C  | 3.32399000  | 0.21295200  | -1.52171900 |
| C  | 3.61001200  | -0.48928400 | 0.79172400  |
| C  | 4.53256400  | 0.89912200  | -1.46398100 |
| C  | 4.81210600  | 0.20422200  | 0.85142200  |
| C  | 5.25798700  | 0.88878800  | -0.27682900 |
| H  | 4.90702900  | 1.43870100  | -2.32595700 |
| H  | 5.40315100  | 0.21321400  | 1.75959300  |
| H  | 3.20680300  | -1.03995500 | 1.64030000  |
| H  | 2.73298000  | 0.19934000  | -2.43103300 |
| Cl | 6.76665900  | 1.75736100  | -0.19835400 |
| C  | -1.13448800 | 2.24707400  | 0.95549500  |
| C  | -0.24684700 | 1.41280800  | 0.41585600  |
| H  | -1.49395300 | 1.99464800  | 1.95198900  |
| C  | 0.30013000  | 0.22611100  | 1.20051400  |
| O  | -0.40035600 | -0.18023200 | 2.27038400  |

|   |             |             |             |
|---|-------------|-------------|-------------|
| C | -1.70438300 | 3.45215800  | 0.33225500  |
| C | -2.82906600 | 4.05033100  | 0.91399800  |
| C | -1.17274000 | 4.03213900  | -0.82805500 |
| C | -3.41819900 | 5.17698700  | 0.34809300  |
| H | -3.24201400 | 3.62116400  | 1.82353900  |
| C | -1.75807600 | 5.15702300  | -1.39444000 |
| H | -0.28380400 | 3.60590100  | -1.28318900 |
| C | -2.88593600 | 5.73382000  | -0.81108100 |
| H | -4.29105700 | 5.62218300  | 0.81530600  |
| H | -1.32942100 | 5.59214000  | -2.29194100 |
| H | -3.33990300 | 6.61445600  | -1.25383900 |
| H | 1.34929800  | 0.51917500  | 1.43996700  |
| H | 0.17289800  | 1.58496300  | -0.57625800 |
| O | 1.22237600  | -2.11751900 | 2.58023500  |
| H | 0.54632200  | -1.35871800 | 2.65768900  |
| H | 1.49200800  | -2.33031900 | 3.47845200  |

Variable frequencies

|          |           |           |
|----------|-----------|-----------|
| 9.0049   | 24.2849   | 24.8625   |
| 38.4778  | 44.8738   | 52.3954   |
| 58.2835  | 74.9579   | 78.6088   |
| 96.7137  | 106.2846  | 117.6434  |
| 138.3406 | 156.7161  | 173.0232  |
| 179.7772 | 189.8268  | 204.6806  |
| 213.8218 | 229.1159  | 244.9255  |
| 248.5823 | 257.0811  | 290.6659  |
| 293.3097 | 317.3295  | 335.4678  |
| 345.0626 | 367.2080  | 377.6293  |
| 407.0730 | 416.7192  | 427.3872  |
| 431.2075 | 451.0379  | 463.0285  |
| 469.5307 | 497.8042  | 500.3770  |
| 524.4838 | 534.9366  | 551.4760  |
| 565.7292 | 590.5623  | 605.2847  |
| 613.4482 | 622.9114  | 635.5274  |
| 642.2437 | 647.9490  | 684.6437  |
| 705.0667 | 715.1312  | 727.4568  |
| 736.8628 | 743.3718  | 751.5089  |
| 767.8884 | 786.1837  | 788.6624  |
| 815.8159 | 842.2960  | 851.0228  |
| 853.8313 | 865.2371  | 873.1084  |
| 880.2619 | 888.6529  | 896.4725  |
| 915.3500 | 919.2662  | 939.4290  |
| 982.2459 | 987.1209  | 993.2523  |
| 993.4996 | 1009.2502 | 1013.8984 |



|           |           |           |
|-----------|-----------|-----------|
| 1017.6124 | 1028.1553 | 1031.4865 |
| 1036.0616 | 1039.3814 | 1043.7316 |
| 1055.5192 | 1066.8747 | 1075.1660 |
| 1078.1751 | 1088.3872 | 1100.8129 |
| 1124.5635 | 1126.4276 | 1128.5074 |
| 1135.6355 | 1154.1114 | 1160.3565 |
| 1171.3256 | 1191.2749 | 1194.6286 |
| 1199.3018 | 1202.0352 | 1210.4489 |
| 1226.0355 | 1235.9178 | 1247.1431 |
| 1250.0601 | 1260.9172 | 1277.0283 |
| 1294.7900 | 1303.5435 | 1307.1691 |
| 1322.9019 | 1324.4027 | 1328.3036 |
| 1339.4889 | 1342.9791 | 1349.1839 |
| 1354.6184 | 1357.0727 | 1373.3422 |
| 1376.9200 | 1378.2607 | 1384.7041 |
| 1421.4543 | 1456.2281 | 1465.8433 |
| 1488.6259 | 1506.9877 | 1510.2120 |
| 1513.7639 | 1520.0015 | 1532.8763 |
| 1539.7057 | 1561.7936 | 1584.4197 |
| 1676.9246 | 1677.9346 | 1678.9991 |
| 1688.1089 | 1696.6156 | 1705.9817 |
| 1706.1962 | 1728.2410 | 1764.5003 |
| 2802.1553 | 2889.6635 | 3064.2255 |
| 3077.4364 | 3134.2551 | 3145.1857 |
| 3164.4161 | 3167.7498 | 3180.8305 |
| 3182.0396 | 3192.0678 | 3194.9276 |
| 3196.5399 | 3197.7599 | 3204.7908 |
| 3205.8258 | 3213.2870 | 3219.1135 |
| 3222.9735 | 3231.7906 | 3239.5532 |
| 3246.8190 | 3254.4263 | 3937.4106 |

## M02<sup>M</sup>

Zero-point correction=0.494105

Thermal correction to Energy=0.524002

Thermal correction to Enthalpy=0.524946

Thermal correction to Gibbs Free Energy=0.430184

Sum of electronic and zero-point Energies=-1931.587359

Sum of electronic and thermal Energies=-1931.557462

Sum of electronic and thermal Enthalpies=-1931.556518

Sum of electronic and thermal Free Energies=-1931.651280

Cartesian coordinate

|   |             |             |             |
|---|-------------|-------------|-------------|
| C | -3.53011300 | -1.98160400 | -0.75377800 |
|---|-------------|-------------|-------------|

|    |             |             |             |
|----|-------------|-------------|-------------|
| C  | -2.75505800 | -1.48416200 | 0.29859700  |
| C  | -3.12372700 | -0.33736600 | 0.98830200  |
| C  | -4.25947400 | 0.35044400  | 0.56444200  |
| C  | -5.01627200 | -0.11946600 | -0.50904200 |
| C  | -4.66620900 | -1.29774400 | -1.16893600 |
| C  | -2.98224200 | -3.29809400 | -1.24078400 |
| C  | -2.13847500 | -3.74247600 | -0.02565300 |
| C  | -1.61865900 | -2.42692600 | 0.61387700  |
| H  | -2.50769900 | -0.01009300 | 1.81841400  |
| H  | -4.56108000 | 1.25859300  | 1.07697100  |
| H  | -5.90021500 | 0.42747300  | -0.82223200 |
| H  | -5.27872000 | -1.67994800 | -1.98004400 |
| H  | -2.36369700 | -3.15338200 | -2.13500800 |
| H  | -2.80543400 | -4.19576700 | 0.71153900  |
| H  | -3.75252900 | -4.03138700 | -1.48988000 |
| H  | -1.39666800 | -2.49767800 | 1.67835500  |
| N  | -0.32067300 | -2.08902600 | -0.04346300 |
| O  | -1.14366500 | -4.71065200 | -0.27171600 |
| C  | 0.48354400  | -1.02121400 | 0.14251100  |
| C  | 0.36350000  | -2.96579400 | -0.85127800 |
| N  | 1.58391600  | -1.28800900 | -0.56306200 |
| N  | 1.52603700  | -2.49620300 | -1.19221300 |
| C  | -0.18379200 | -4.31031200 | -1.21809700 |
| H  | -0.59257900 | -4.28780500 | -2.23643200 |
| H  | 0.62814500  | -5.03880400 | -1.19289500 |
| C  | 2.80471400  | -0.53416900 | -0.60803200 |
| C  | 3.23112300  | -0.01346600 | -1.82208200 |
| C  | 3.54303100  | -0.39542500 | 0.56357300  |
| C  | 4.43323000  | 0.68364100  | -1.86947100 |
| C  | 4.73871600  | 0.31245900  | 0.51458700  |
| C  | 5.16874900  | 0.84234900  | -0.69910200 |
| H  | 4.79602100  | 1.10195800  | -2.80075000 |
| H  | 5.33508100  | 0.44702600  | 1.40975600  |
| H  | 3.16489500  | -0.82515600 | 1.49333100  |
| H  | 2.63444400  | -0.15769100 | -2.71640200 |
| Cl | 6.66766100  | 1.72850600  | -0.75775500 |
| C  | -1.22860000 | 2.17467600  | 0.81967600  |
| C  | -0.36699000 | 1.32240900  | 0.26648000  |
| H  | -1.52654600 | 1.97198500  | 1.84746800  |
| C  | 0.25686400  | 0.18632500  | 1.06720500  |
| O  | -0.37224800 | -0.21273200 | 2.18715900  |
| C  | -1.84733900 | 3.34016900  | 0.16793300  |
| C  | -2.95681900 | 3.94790600  | 0.76861600  |
| C  | -1.37427700 | 3.87276900  | -1.03970900 |

|   |             |             |             |
|---|-------------|-------------|-------------|
| C | -3.58869200 | 5.03687000  | 0.17546800  |
| H | -3.32326900 | 3.55757400  | 1.71487100  |
| C | -2.00238400 | 4.95986000  | -1.63324300 |
| H | -0.49592400 | 3.44116900  | -1.50995100 |
| C | -3.11545700 | 5.54550000  | -1.03067000 |
| H | -4.44869200 | 5.49069600  | 0.65791000  |
| H | -1.61836700 | 5.35885700  | -2.56699600 |
| H | -3.60319800 | 6.39645900  | -1.49496100 |
| H | 1.30066900  | 0.53089500  | 1.24963200  |
| H | -0.01661100 | 1.45076000  | -0.75862500 |
| C | 2.25034500  | 0.17021800  | 3.81790500  |
| H | 2.88098900  | 0.78442300  | 3.14975200  |
| H | 1.40707900  | 0.79848800  | 4.13199800  |
| H | 2.84920400  | -0.06939600 | 4.70473200  |
| O | 1.80905700  | -1.00708400 | 3.19171000  |
| H | 0.85893300  | -0.80169200 | 2.87945000  |

Variable frequencies

|          |          |           |
|----------|----------|-----------|
| 15.9091  | 24.4524  | 26.4451   |
| 29.2573  | 32.8364  | 46.1817   |
| 56.1373  | 59.9117  | 79.8523   |
| 97.4935  | 100.9035 | 103.2738  |
| 109.9907 | 117.1266 | 138.1037  |
| 141.6852 | 172.8493 | 181.8495  |
| 187.4845 | 200.5880 | 213.4977  |
| 221.6989 | 242.2084 | 247.2732  |
| 257.9712 | 291.7424 | 292.8530  |
| 316.5506 | 341.5540 | 353.5208  |
| 365.9934 | 367.6424 | 405.6446  |
| 416.2667 | 426.9833 | 431.7699  |
| 451.8392 | 463.5512 | 469.8064  |
| 498.1770 | 502.1446 | 526.6721  |
| 534.9323 | 549.0221 | 563.9827  |
| 591.0601 | 606.8901 | 622.7765  |
| 634.9438 | 642.6989 | 648.9527  |
| 685.9562 | 705.3874 | 717.5793  |
| 726.2881 | 734.7757 | 742.4775  |
| 755.2090 | 767.4342 | 780.9807  |
| 790.2786 | 813.6183 | 841.0592  |
| 848.3282 | 851.5276 | 866.9127  |
| 874.1038 | 878.8542 | 880.3378  |
| 896.3349 | 910.1908 | 915.4508  |
| 942.9954 | 977.4841 | 990.7524  |
| 992.6030 | 997.2638 | 1008.3070 |

|           |           |           |
|-----------|-----------|-----------|
| 1016.3899 | 1017.8657 | 1026.0157 |
| 1027.6687 | 1037.4028 | 1044.8926 |
| 1053.6113 | 1060.4874 | 1069.7087 |
| 1074.9018 | 1078.3160 | 1098.6611 |
| 1122.4523 | 1123.6422 | 1128.4693 |
| 1138.0892 | 1140.4951 | 1156.9670 |
| 1161.7902 | 1167.2856 | 1175.4807 |
| 1185.3815 | 1190.3140 | 1195.1006 |
| 1201.8349 | 1205.4846 | 1210.3435 |
| 1224.5201 | 1234.3754 | 1235.9565 |
| 1247.9770 | 1253.4666 | 1262.1924 |
| 1277.4870 | 1294.9496 | 1304.8567 |
| 1306.8566 | 1324.0611 | 1329.8424 |
| 1330.5584 | 1338.6380 | 1343.5701 |
| 1352.3364 | 1353.3410 | 1356.9102 |
| 1371.9251 | 1377.7108 | 1382.8163 |
| 1388.4670 | 1422.3332 | 1452.1810 |
| 1468.1608 | 1487.6697 | 1490.2582 |
| 1502.6994 | 1508.2628 | 1511.9774 |
| 1518.7492 | 1521.2557 | 1523.7027 |
| 1537.1652 | 1540.7124 | 1560.1732 |
| 1580.9979 | 1582.6542 | 1673.8056 |
| 1679.1832 | 1680.1939 | 1684.5387 |
| 1693.2279 | 1703.7409 | 1705.9124 |
| 1765.2181 | 2751.9918 | 2918.1336 |
| 2984.5723 | 3067.9405 | 3069.6164 |
| 3079.6077 | 3112.1829 | 3136.5255 |
| 3147.2132 | 3155.7960 | 3166.6578 |
| 3168.5955 | 3178.9857 | 3184.0395 |
| 3198.9229 | 3200.2900 | 3203.5794 |
| 3208.6198 | 3213.5376 | 3220.3843 |
| 3221.9079 | 3225.8420 | 3228.7741 |
| 3234.5685 | 3241.7472 | 3254.7428 |

## **M02<sup>P</sup>**

Zero-point correction=0.590112

Thermal correction to Energy=0.625322

Thermal correction to Enthalpy=0.626266

Thermal correction to Gibbs Free Energy=0.519327

Sum of electronic and zero-point Energies=-2162.743183

Sum of electronic and thermal Energies=-2162.707972

Sum of electronic and thermal Enthalpies=-2162.707028

Sum of electronic and thermal Free Energies=-2162.813968

Cartesian coordinate

|    |             |             |             |
|----|-------------|-------------|-------------|
| C  | 3.09710200  | 2.89310200  | -0.95995800 |
| C  | 2.50255900  | 1.68639800  | -0.59413100 |
| C  | 3.10834800  | 0.46688900  | -0.87665900 |
| C  | 4.34019300  | 0.47111200  | -1.52861400 |
| C  | 4.94375200  | 1.67630600  | -1.89157600 |
| C  | 4.32639700  | 2.89435900  | -1.61161000 |
| C  | 2.24045900  | 4.06378500  | -0.54340300 |
| C  | 0.87602100  | 3.44367200  | -0.17841400 |
| C  | 1.19540500  | 1.94433500  | 0.12787400  |
| H  | 2.63449700  | -0.46942100 | -0.59559100 |
| H  | 4.83143100  | -0.47070800 | -1.75126100 |
| H  | 5.90109000  | 1.66428900  | -2.40284900 |
| H  | 4.79480100  | 3.82936200  | -1.90455700 |
| H  | 2.11603600  | 4.81800200  | -1.32550200 |
| H  | 0.40679900  | 3.89628500  | 0.69472700  |
| H  | 2.67056800  | 4.56509400  | 0.33072400  |
| H  | 1.27043400  | 1.77705600  | 1.20128300  |
| N  | 0.11629200  | 1.09041200  | -0.37554800 |
| O  | -0.07716400 | 3.60977300  | -1.22625000 |
| C  | -0.47377500 | -0.01365700 | 0.10072500  |
| C  | -0.42544100 | 1.33836900  | -1.60892200 |
| N  | -1.28256300 | -0.42635600 | -0.87371700 |
| N  | -1.28559600 | 0.42469700  | -1.94399800 |
| C  | -0.05389500 | 2.63538500  | -2.25286300 |
| H  | 0.92943000  | 2.56853800  | -2.73704400 |
| H  | -0.80454500 | 2.91216500  | -2.99375300 |
| C  | -2.14870300 | -1.57036900 | -0.86018800 |
| C  | -3.30439500 | -1.54206700 | -0.08687800 |
| C  | -1.81112100 | -2.66369500 | -1.65047600 |
| C  | -4.13689800 | -2.65673400 | -0.09760300 |
| C  | -2.64906100 | -3.77205900 | -1.66485100 |
| C  | -3.80147000 | -3.75496800 | -0.88365900 |
| H  | -5.04393900 | -2.67118200 | 0.49516900  |
| H  | -2.41333100 | -4.63922900 | -2.27022200 |
| H  | -0.90699900 | -2.64197600 | -2.24976800 |
| H  | -3.52289800 | -0.65529000 | 0.50178900  |
| Cl | -4.85022400 | -5.14498200 | -0.89464600 |
| C  | 2.06730900  | -1.64959500 | 1.66699600  |
| C  | 0.82332800  | -1.74900800 | 1.19600800  |
| H  | 2.31401400  | -0.77128300 | 2.26033200  |
| C  | -0.22170200 | -0.68314000 | 1.44167800  |
| O  | 0.20799800  | 0.23875600  | 2.37501900  |

|   |             |             |             |
|---|-------------|-------------|-------------|
| C | 3.15672600  | -2.60130300 | 1.38888800  |
| C | 4.47764900  | -2.13620400 | 1.39198100  |
| C | 2.91910000  | -3.94940900 | 1.09221900  |
| C | 5.53231300  | -2.98874300 | 1.08125400  |
| H | 4.67156500  | -1.09285000 | 1.62720700  |
| C | 3.97315500  | -4.80232300 | 0.78653200  |
| H | 1.90374800  | -4.33367300 | 1.12610200  |
| C | 5.28284700  | -4.32433300 | 0.77582100  |
| H | 6.54980100  | -2.61091400 | 1.08241500  |
| H | 3.77418000  | -5.84641500 | 0.56646900  |
| H | 6.10474800  | -4.99275700 | 0.54065100  |
| H | -1.18096900 | -1.14806500 | 1.71424600  |
| H | 0.51722900  | -2.58081500 | 0.56219700  |
| C | -2.16945100 | 2.16477600  | 1.51454800  |
| O | -2.58702800 | 1.00382000  | 1.30249300  |
| O | -1.03882700 | 2.42665400  | 2.03296000  |
| H | -0.38379400 | 1.08235100  | 2.33768200  |
| C | -3.09489900 | 3.33397500  | 1.12246600  |
| C | -4.32874800 | 3.25588800  | 2.03228500  |
| H | -5.05341900 | 4.03012000  | 1.75726200  |
| H | -4.80472000 | 2.27678500  | 1.93799600  |
| H | -4.05056700 | 3.40588500  | 3.08072200  |
| C | -2.40385400 | 4.68558100  | 1.28316000  |
| H | -1.58257600 | 4.78481300  | 0.56677700  |
| H | -3.11628600 | 5.49634100  | 1.09351100  |
| H | -1.99841600 | 4.80020600  | 2.29100500  |
| C | -3.52012100 | 3.13236000  | -0.33691400 |
| H | -4.23554500 | 3.90597300  | -0.63744200 |
| H | -2.64894500 | 3.20010100  | -0.99844000 |
| H | -3.98115500 | 2.15050000  | -0.46808400 |

Variable frequencies

|          |          |          |
|----------|----------|----------|
| 9.6963   | 11.8378  | 21.2421  |
| 27.3382  | 32.3233  | 37.1562  |
| 45.2150  | 55.1559  | 60.3778  |
| 75.2716  | 80.6210  | 88.3700  |
| 91.8358  | 105.7652 | 113.3467 |
| 117.1936 | 128.1800 | 130.1222 |
| 142.2985 | 156.4025 | 178.9478 |
| 201.9701 | 216.3172 | 224.8858 |
| 229.1458 | 254.4866 | 261.1928 |
| 265.8290 | 273.2168 | 291.6961 |
| 295.2246 | 300.0872 | 313.2841 |
| 321.0710 | 335.1760 | 356.6243 |

|           |           |           |
|-----------|-----------|-----------|
| 368.9921  | 376.6669  | 386.2138  |
| 389.0646  | 401.6892  | 415.8390  |
| 418.0475  | 421.6112  | 425.2202  |
| 443.7140  | 458.1494  | 471.1806  |
| 490.4374  | 511.6091  | 517.7976  |
| 535.9104  | 542.7347  | 551.7844  |
| 557.0045  | 596.8113  | 607.1044  |
| 608.6786  | 625.2421  | 628.4654  |
| 645.6993  | 689.8699  | 697.6960  |
| 714.3826  | 723.4395  | 733.9127  |
| 738.2043  | 743.4467  | 754.2072  |
| 764.2175  | 788.9245  | 792.4447  |
| 804.8895  | 817.8083  | 821.2724  |
| 842.5853  | 854.8408  | 857.0876  |
| 874.3470  | 877.2024  | 877.7323  |
| 891.2373  | 894.8579  | 910.7002  |
| 913.2419  | 928.7777  | 949.2957  |
| 950.5806  | 957.7883  | 960.2318  |
| 965.5347  | 983.4866  | 986.0069  |
| 986.7740  | 1000.1114 | 1017.3605 |
| 1018.7533 | 1020.0446 | 1022.9336 |
| 1031.2472 | 1032.9313 | 1044.2208 |
| 1049.9922 | 1052.6530 | 1053.2338 |
| 1056.0551 | 1067.1066 | 1068.7033 |
| 1070.2123 | 1097.5595 | 1116.1857 |
| 1116.6018 | 1131.3790 | 1138.8918 |
| 1146.2875 | 1154.1149 | 1176.7258 |
| 1179.7614 | 1192.5201 | 1206.2432 |
| 1207.7576 | 1213.1488 | 1220.8163 |
| 1230.9654 | 1236.0282 | 1247.9978 |
| 1256.2701 | 1264.0181 | 1269.6445 |
| 1277.1411 | 1283.7193 | 1287.2610 |
| 1297.7715 | 1303.4829 | 1306.7168 |
| 1325.6628 | 1329.2254 | 1332.4536 |
| 1338.0754 | 1340.8174 | 1354.8688 |
| 1362.8024 | 1367.0809 | 1374.6897 |
| 1381.8022 | 1385.1317 | 1391.3384 |
| 1399.6712 | 1421.2302 | 1433.7248 |
| 1464.7917 | 1475.2958 | 1480.8450 |
| 1486.4278 | 1487.7006 | 1496.6036 |
| 1499.3819 | 1501.0088 | 1501.1952 |
| 1511.9317 | 1512.2679 | 1516.1198 |
| 1537.9663 | 1539.7536 | 1547.8057 |
| 1552.8920 | 1558.8134 | 1580.4409 |

|           |           |           |
|-----------|-----------|-----------|
| 1607.6210 | 1670.3286 | 1674.6960 |
| 1684.2960 | 1687.8466 | 1693.4344 |
| 1699.1208 | 1703.6235 | 1704.7210 |
| 1762.5526 | 2624.8661 | 3051.7898 |
| 3055.3898 | 3062.9443 | 3072.0372 |
| 3079.8671 | 3082.2031 | 3126.6579 |
| 3128.8599 | 3138.4704 | 3141.6607 |
| 3159.2767 | 3163.1583 | 3164.8347 |
| 3177.6965 | 3180.1629 | 3182.5869 |
| 3193.1906 | 3198.1613 | 3199.8321 |
| 3203.0402 | 3208.3996 | 3210.7905 |
| 3213.8623 | 3214.6927 | 3220.6736 |
| 3224.4727 | 3231.0941 | 3236.2137 |
| 3238.8712 | 3252.9760 | 3256.1360 |

## TS2<sup>H</sup>

Zero-point correction=0.461719

Thermal correction to Energy=0.489438

Thermal correction to Enthalpy=0.490382

Thermal correction to Gibbs Free Energy=0.400090

Sum of electronic and zero-point Energies=-1892.306800

Sum of electronic and thermal Energies=-1892.279081

Sum of electronic and thermal Enthalpies=-1892.278136

Sum of electronic and thermal Free Energies=-1892.368429

### Cartesian coordinate

|   |             |             |             |
|---|-------------|-------------|-------------|
| C | -4.10933800 | 0.06815600  | -0.98575500 |
| C | -3.24647000 | 0.25133000  | 0.09875100  |
| C | -2.80835800 | 1.52115800  | 0.45902400  |
| C | -3.21636100 | 2.60785500  | -0.31258300 |
| C | -4.06624500 | 2.42738700  | -1.40387800 |
| C | -4.52769300 | 1.15632600  | -1.74246400 |
| C | -4.47436500 | -1.38287000 | -1.15442200 |
| C | -4.08141100 | -1.98184700 | 0.21289000  |
| C | -2.94794900 | -1.07397000 | 0.76750800  |
| H | -2.16215200 | 1.64730300  | 1.31916700  |
| H | -2.87002000 | 3.60411700  | -0.05630000 |
| H | -4.37919000 | 3.28619600  | -1.98939400 |
| H | -5.20615100 | 1.01911300  | -2.57921600 |
| H | -3.89973700 | -1.82753000 | -1.97523400 |
| H | -4.92524400 | -1.87816600 | 0.89849600  |
| H | -5.53154500 | -1.54588500 | -1.37606500 |
| H | -2.91609400 | -1.02170800 | 1.85471000  |



|    |             |             |             |
|----|-------------|-------------|-------------|
| N  | -1.65049700 | -1.65341800 | 0.33325100  |
| O  | -3.76596700 | -3.35770000 | 0.21959600  |
| C  | -0.40557500 | -1.14552300 | 0.47890100  |
| C  | -1.52964200 | -2.81779100 | -0.38316500 |
| N  | 0.39200400  | -2.00026500 | -0.17534300 |
| N  | -0.29711300 | -3.04280700 | -0.72424000 |
| C  | -2.70694600 | -3.70894000 | -0.63851500 |
| H  | -2.99625000 | -3.66712300 | -1.69564300 |
| H  | -2.42889200 | -4.73796800 | -0.40466400 |
| C  | 1.82202800  | -1.96307800 | -0.28542500 |
| C  | 2.37763700  | -1.93713300 | -1.55967200 |
| C  | 2.60604700  | -1.99850100 | 0.86524500  |
| C  | 3.76001000  | -1.93736200 | -1.69776600 |
| C  | 3.98956900  | -1.98494900 | 0.72028100  |
| C  | 4.55026700  | -1.95688500 | -0.55258300 |
| H  | 4.22034300  | -1.91892000 | -2.67852900 |
| H  | 4.63019700  | -2.00545400 | 1.59422000  |
| H  | 2.14596400  | -2.01201200 | 1.85659000  |
| H  | 1.73223300  | -1.92462400 | -2.43124100 |
| Cl | 6.28527500  | -1.95009500 | -0.72079700 |
| C  | 0.47867000  | 2.40855600  | 1.04452000  |
| C  | 0.57123800  | 1.15508600  | 0.58640300  |
| H  | -0.07230700 | 2.56562100  | 1.97035900  |
| C  | 0.04706600  | -0.01979900 | 1.32763300  |
| O  | -0.87834500 | 0.24133000  | 2.34981100  |
| C  | 1.02181100  | 3.61016800  | 0.39446200  |
| C  | 0.55951900  | 4.86988500  | 0.79842100  |
| C  | 1.99106700  | 3.55785000  | -0.61812600 |
| C  | 1.02919800  | 6.03516600  | 0.20119800  |
| H  | -0.18207900 | 4.92903300  | 1.59120500  |
| C  | 2.45939000  | 4.72036700  | -1.21724600 |
| H  | 2.39606700  | 2.59853700  | -0.92674100 |
| C  | 1.97984800  | 5.96599000  | -0.81330100 |
| H  | 0.65388200  | 6.99872200  | 0.53185800  |
| H  | 3.21218700  | 4.65528900  | -1.99695500 |
| H  | 2.35203100  | 6.87299000  | -1.27850700 |
| H  | 0.87486300  | -0.53540300 | 2.06559900  |
| H  | 1.09276900  | 0.93850100  | -0.34626000 |
| O  | 0.94086600  | -1.11685000 | 3.39582800  |
| H  | -0.37572200 | -0.24210200 | 3.10109900  |
| H  | 1.56389600  | -0.58551400 | 3.90544700  |

Variable frequencies

-899.4819      10.8925      15.9631

|           |           |           |
|-----------|-----------|-----------|
| 19.8630   | 26.6948   | 41.7116   |
| 53.3308   | 59.9063   | 67.0736   |
| 87.0258   | 98.8724   | 112.0570  |
| 126.6970  | 140.0226  | 146.0780  |
| 169.4124  | 207.6988  | 220.2196  |
| 233.4538  | 236.1518  | 254.2941  |
| 266.0032  | 278.6576  | 293.8737  |
| 322.0363  | 346.4694  | 351.6982  |
| 360.3273  | 376.5682  | 397.4113  |
| 414.0248  | 417.1858  | 433.7383  |
| 443.3387  | 453.4919  | 467.6095  |
| 476.0873  | 494.4471  | 497.2849  |
| 514.5336  | 525.2741  | 527.6775  |
| 537.2753  | 561.4322  | 578.2374  |
| 595.6804  | 607.5461  | 630.1339  |
| 633.2024  | 650.7216  | 655.9427  |
| 697.4606  | 711.8200  | 725.3046  |
| 731.4754  | 741.1284  | 752.6032  |
| 761.1145  | 768.5052  | 785.0218  |
| 807.4392  | 820.6617  | 846.5893  |
| 850.0161  | 857.4404  | 864.8646  |
| 872.6804  | 884.8673  | 894.7544  |
| 901.6195  | 911.0313  | 917.0559  |
| 940.3015  | 982.2882  | 986.6909  |
| 994.8386  | 1002.1301 | 1006.7392 |
| 1012.5871 | 1015.5087 | 1020.5264 |
| 1030.1473 | 1033.9750 | 1034.6622 |
| 1056.0271 | 1068.8144 | 1071.4241 |
| 1077.4211 | 1082.8149 | 1097.3076 |
| 1115.2083 | 1121.7253 | 1131.7358 |
| 1133.2205 | 1146.8635 | 1163.1729 |
| 1174.2805 | 1178.0183 | 1182.4681 |
| 1202.0067 | 1203.4828 | 1207.2273 |
| 1222.8926 | 1227.1960 | 1242.0558 |
| 1250.7234 | 1262.1551 | 1271.9572 |
| 1277.6428 | 1303.3283 | 1316.0679 |
| 1327.5994 | 1331.5280 | 1336.2638 |
| 1342.6788 | 1342.8190 | 1350.4882 |
| 1351.8837 | 1363.3257 | 1365.7560 |
| 1375.7966 | 1384.1068 | 1418.9487 |
| 1461.7975 | 1465.7908 | 1483.0817 |
| 1492.8967 | 1501.5276 | 1507.7843 |
| 1517.1853 | 1522.7263 | 1537.9307 |
| 1551.8799 | 1555.3141 | 1569.8739 |

|           |           |           |
|-----------|-----------|-----------|
| 1588.4818 | 1668.0786 | 1676.0267 |
| 1682.7022 | 1685.3723 | 1693.7967 |
| 1699.3009 | 1703.6615 | 1749.3516 |
| 1981.7525 | 2826.0886 | 3077.2429 |
| 3090.6768 | 3134.9529 | 3144.6951 |
| 3146.9312 | 3168.0690 | 3172.2070 |
| 3179.6644 | 3188.8480 | 3192.1643 |
| 3198.7712 | 3199.8178 | 3208.7556 |
| 3210.4706 | 3217.8918 | 3228.1710 |
| 3228.4291 | 3231.7608 | 3247.0367 |
| 3253.3397 | 3254.3572 | 3896.9863 |

## TS2<sup>M</sup>

Zero-point correction=0.490025

Thermal correction to Energy=0.519661

Thermal correction to Enthalpy=0.520605

Thermal correction to Gibbs Free Energy=0.425770

Sum of electronic and zero-point Energies=-1931.561309

Sum of electronic and thermal Energies=-1931.531674

Sum of electronic and thermal Enthalpies=-1931.530730

Sum of electronic and thermal Free Energies=-1931.625565

### Cartesian coordinate

|   |             |             |             |
|---|-------------|-------------|-------------|
| C | -4.21242700 | 0.03427400  | -0.94690300 |
| C | -3.31622100 | 0.21153900  | 0.11131300  |
| C | -2.88060100 | 1.48087100  | 0.47604900  |
| C | -3.32431900 | 2.57392600  | -0.26593100 |
| C | -4.20647400 | 2.39944800  | -1.33234000 |
| C | -4.66605400 | 1.12844200  | -1.67380400 |
| C | -4.56978900 | -1.41778000 | -1.12293400 |
| C | -4.12389600 | -2.03180500 | 0.22143900  |
| C | -2.98067100 | -1.12006400 | 0.74905600  |
| H | -2.20953600 | 1.60392600  | 1.31707000  |
| H | -2.98009800 | 3.57008700  | -0.00658200 |
| H | -4.54651700 | 3.26291400  | -1.89545900 |
| H | -5.37034300 | 0.99590600  | -2.48960200 |
| H | -4.02169000 | -1.84621600 | -1.97003600 |
| H | -4.94413500 | -1.94578800 | 0.93742700  |
| H | -5.63281800 | -1.58713800 | -1.30883800 |
| H | -2.91203200 | -1.08509300 | 1.83537800  |
| N | -1.69399200 | -1.68006800 | 0.25966500  |
| O | -3.79403100 | -3.40390900 | 0.19868100  |
| C | -0.44991000 | -1.16313000 | 0.36850400  |

|    |             |             |             |
|----|-------------|-------------|-------------|
| C  | -1.58680700 | -2.83363100 | -0.47704800 |
| N  | 0.33352400  | -2.00020600 | -0.32371700 |
| N  | -0.36428000 | -3.04136700 | -0.86306900 |
| C  | -2.76385400 | -3.73345900 | -0.70202800 |
| H  | -3.09174100 | -3.68099000 | -1.74725900 |
| H  | -2.46738500 | -4.76245400 | -0.49159100 |
| C  | 1.75888400  | -1.93982900 | -0.48634100 |
| C  | 2.26512500  | -1.86870900 | -1.77931900 |
| C  | 2.58674600  | -1.99164800 | 0.63272900  |
| C  | 3.64122700  | -1.83806100 | -1.96817400 |
| C  | 3.96358100  | -1.94647500 | 0.43759000  |
| C  | 4.47471000  | -1.87261500 | -0.85427200 |
| H  | 4.06392300  | -1.78369600 | -2.96440100 |
| H  | 4.63569200  | -1.97710400 | 1.28724400  |
| H  | 2.16546200  | -2.03832000 | 1.64006100  |
| H  | 1.58730800  | -1.84415300 | -2.62570700 |
| Cl | 6.20121700  | -1.82711300 | -1.08851700 |
| C  | 0.40751100  | 2.39672700  | 0.91830000  |
| C  | 0.50599300  | 1.14617100  | 0.45458400  |
| H  | -0.10466700 | 2.54348000  | 1.86791800  |
| C  | 0.03139600  | -0.04289900 | 1.21011800  |
| O  | -0.85357700 | 0.20665400  | 2.27357100  |
| C  | 0.89889100  | 3.60768100  | 0.24462900  |
| C  | 0.41270100  | 4.85724900  | 0.65150300  |
| C  | 1.84089700  | 3.57233200  | -0.79381500 |
| C  | 0.83243700  | 6.02955300  | 0.03132800  |
| H  | -0.30656200 | 4.90257100  | 1.46549400  |
| C  | 2.25962900  | 4.74194900  | -1.41539300 |
| H  | 2.26532200  | 2.62178600  | -1.10349400 |
| C  | 1.75607400  | 5.97713600  | -1.00883200 |
| H  | 0.44009100  | 6.98545800  | 0.36434000  |
| H  | 2.99263000  | 4.69126700  | -2.21476700 |
| H  | 2.08950600  | 6.88968100  | -1.49231000 |
| H  | 0.89891300  | -0.55184100 | 1.88568900  |
| H  | 0.99134600  | 0.94108700  | -0.49985500 |
| C  | 2.13068300  | -0.25832300 | 3.78023100  |
| H  | 3.12747300  | -0.41346600 | 3.31968600  |
| H  | 1.91704400  | 0.82360000  | 3.67482700  |
| H  | 2.26023600  | -0.44443300 | 4.86099500  |
| O  | 1.15031300  | -1.06783300 | 3.22467700  |
| H  | -0.32927300 | -0.23118000 | 3.01155200  |

Variable frequencies

-732.4755      12.6514      21.7226

|           |           |           |
|-----------|-----------|-----------|
| 22.6427   | 30.2790   | 33.9581   |
| 46.5820   | 51.3950   | 60.6668   |
| 72.8037   | 81.0758   | 91.4755   |
| 97.9680   | 118.1792  | 122.0769  |
| 131.9033  | 143.4810  | 164.2412  |
| 170.7373  | 206.6391  | 219.2493  |
| 233.5702  | 237.3002  | 254.2020  |
| 265.8786  | 281.1464  | 294.2095  |
| 310.2193  | 325.4328  | 347.2868  |
| 357.8609  | 366.8839  | 392.9799  |
| 414.5323  | 417.0755  | 431.1699  |
| 450.6021  | 455.4804  | 468.0357  |
| 480.0024  | 495.1514  | 525.3667  |
| 528.1609  | 534.6370  | 557.9429  |
| 580.9374  | 595.4060  | 607.1826  |
| 629.7095  | 632.2491  | 650.0164  |
| 655.6935  | 697.0172  | 711.9076  |
| 725.8200  | 730.9218  | 739.4891  |
| 749.3460  | 760.5275  | 768.1539  |
| 783.0628  | 808.6290  | 820.4209  |
| 846.8421  | 851.4377  | 856.9767  |
| 864.8145  | 871.9350  | 884.6699  |
| 894.3472  | 894.6322  | 911.9655  |
| 917.8883  | 940.5339  | 966.9345  |
| 981.1732  | 987.9916  | 994.5534  |
| 1006.4298 | 1007.3950 | 1012.0733 |
| 1015.8576 | 1020.0743 | 1032.9681 |
| 1035.5141 | 1037.0099 | 1055.9234 |
| 1070.6573 | 1071.4492 | 1075.9586 |
| 1093.7973 | 1110.7023 | 1118.6119 |
| 1129.2631 | 1132.4138 | 1145.4541 |
| 1156.9107 | 1163.2147 | 1174.1168 |
| 1178.4067 | 1182.6430 | 1188.1318 |
| 1200.3746 | 1201.2622 | 1204.2989 |
| 1207.6769 | 1219.2349 | 1228.4627 |
| 1240.8770 | 1250.7323 | 1261.5190 |
| 1268.2651 | 1275.9901 | 1303.9533 |
| 1317.3117 | 1328.4960 | 1332.0359 |
| 1336.5465 | 1340.3749 | 1343.8812 |
| 1352.0260 | 1352.7337 | 1363.5466 |
| 1365.8513 | 1376.6612 | 1383.7796 |
| 1419.8918 | 1448.0299 | 1462.8503 |
| 1468.0956 | 1491.9290 | 1494.9494 |
| 1503.0611 | 1511.4130 | 1512.8823 |

|           |           |           |
|-----------|-----------|-----------|
| 1514.6467 | 1519.1381 | 1523.7314 |
| 1539.7377 | 1552.4318 | 1554.8661 |
| 1566.2016 | 1584.5513 | 1669.1092 |
| 1674.8342 | 1682.7991 | 1684.2941 |
| 1691.1704 | 1699.2726 | 1705.1881 |
| 1749.6301 | 2014.1784 | 2929.4867 |
| 2962.7181 | 2998.1155 | 3074.3096 |
| 3087.9996 | 3104.3000 | 3134.8082 |
| 3145.2036 | 3146.9495 | 3169.8557 |
| 3171.8616 | 3183.4420 | 3188.3136 |
| 3190.1864 | 3196.6656 | 3202.7418 |
| 3207.2466 | 3211.1262 | 3216.3442 |
| 3226.1866 | 3227.2851 | 3228.6250 |
| 3242.2696 | 3243.7933 | 3258.7029 |

## TS2<sup>‡</sup>

Zero-point correction=0.585901

Thermal correction to Energy=0.620922

Thermal correction to Enthalpy=0.621866

Thermal correction to Gibbs Free Energy=0.516542

Sum of electronic and zero-point Energies=-2162.720603

Sum of electronic and thermal Energies=-2162.685582

Sum of electronic and thermal Enthalpies=-2162.684638

Sum of electronic and thermal Free Energies=-2162.789962

### Cartesian coordinate

|   |             |             |             |
|---|-------------|-------------|-------------|
| C | -4.21237600 | -2.50333200 | 0.89085300  |
| C | -2.94802300 | -2.19730600 | 0.39610600  |
| C | -1.90995700 | -3.12455800 | 0.41976300  |
| C | -2.15989500 | -4.37797800 | 0.97112100  |
| C | -3.42437800 | -4.69146300 | 1.47708700  |
| C | -4.45950800 | -3.76089200 | 1.43644200  |
| C | -5.16692800 | -1.34886600 | 0.71885500  |
| C | -4.30843800 | -0.17505100 | 0.18276700  |
| C | -2.89527700 | -0.78828500 | -0.13997400 |
| H | -0.93835100 | -2.87556100 | -0.00016200 |
| H | -1.36874000 | -5.11993700 | 1.00398400  |
| H | -3.60142800 | -5.67349000 | 1.90423400  |
| H | -5.44206500 | -4.01179600 | 1.82538700  |
| H | -5.66006000 | -1.05530600 | 1.65192700  |
| H | -4.72320700 | 0.24267000  | -0.73493400 |
| H | -5.96047700 | -1.59610100 | 0.00706100  |
| H | -2.71805400 | -0.74951200 | -1.20879100 |

|    |             |             |             |
|----|-------------|-------------|-------------|
| N  | -1.82355700 | -0.01264000 | 0.50604100  |
| O  | -4.27955000 | 0.92603800  | 1.07823500  |
| C  | -0.49108800 | 0.06475600  | 0.24472500  |
| C  | -2.04825900 | 0.64026500  | 1.69275000  |
| N  | -0.00112100 | 0.81046300  | 1.26422400  |
| N  | -0.96951100 | 1.16287800  | 2.17395500  |
| C  | -3.44883800 | 0.71575800  | 2.19915500  |
| H  | -3.71549400 | -0.20735300 | 2.73492100  |
| H  | -3.55852500 | 1.56473200  | 2.87401800  |
| C  | 1.32052300  | 1.32421500  | 1.44904800  |
| C  | 1.86507300  | 2.18131300  | 0.49746800  |
| C  | 2.02084300  | 0.96583100  | 2.59581000  |
| C  | 3.15477300  | 2.66516900  | 0.68692600  |
| C  | 3.30440800  | 1.46112200  | 2.79176500  |
| C  | 3.85957400  | 2.30053900  | 1.83016800  |
| H  | 3.60604800  | 3.32814800  | -0.04199500 |
| H  | 3.87265200  | 1.19497700  | 3.67518800  |
| H  | 1.56355900  | 0.30230000  | 3.32149400  |
| H  | 1.29092500  | 2.45493200  | -0.38348200 |
| Cl | 5.47311100  | 2.91354200  | 2.06747900  |
| C  | 2.08568400  | -1.88157000 | -1.54661100 |
| C  | 1.57379600  | -0.91336800 | -0.77382200 |
| H  | 1.44618900  | -2.32421800 | -2.30582700 |
| C  | 0.20875900  | -0.37540300 | -0.95377300 |
| O  | -0.58279400 | -1.18604300 | -1.78458600 |
| C  | 3.44921300  | -2.41943300 | -1.43164200 |
| C  | 3.74767500  | -3.65072600 | -2.03044700 |
| C  | 4.47834500  | -1.75185300 | -0.74948500 |
| C  | 5.01745600  | -4.21023600 | -1.93384500 |
| H  | 2.96454100  | -4.17431300 | -2.57239600 |
| C  | 5.74629000  | -2.31110600 | -0.64954600 |
| H  | 4.29142500  | -0.77472600 | -0.31194300 |
| C  | 6.02301100  | -3.54458000 | -1.23809200 |
| H  | 5.22123700  | -5.16738800 | -2.40401600 |
| H  | 6.52827000  | -1.77576800 | -0.11966200 |
| H  | 7.01575400  | -3.97626500 | -1.16188300 |
| H  | 0.21613900  | 0.86139400  | -1.57779300 |
| H  | 2.18039300  | -0.48541800 | 0.01862200  |
| C  | -1.34940700 | 2.00996000  | -2.24796800 |
| O  | -0.07679300 | 1.98935600  | -2.01295700 |
| O  | -2.01469700 | 0.99599300  | -2.50666100 |
| H  | -1.06076000 | -0.56581100 | -2.37309200 |
| C  | -2.03167300 | 3.36728600  | -2.06946800 |
| C  | -3.38080600 | 3.38073400  | -2.78526100 |

|   |             |            |             |
|---|-------------|------------|-------------|
| H | -3.88465200 | 4.33724800 | -2.61394000 |
| H | -3.25264800 | 3.24656900 | -3.86343200 |
| H | -4.02044800 | 2.57433000 | -2.42056700 |
| C | -2.24015100 | 3.51307600 | -0.55013200 |
| H | -1.28417400 | 3.44571400 | -0.01793700 |
| H | -2.68877500 | 4.48636000 | -0.32562200 |
| H | -2.91081400 | 2.73296300 | -0.17112900 |
| C | -1.13422700 | 4.49555500 | -2.58346700 |
| H | -1.62355300 | 5.46143000 | -2.42234700 |
| H | -0.17418200 | 4.49788200 | -2.06352500 |
| H | -0.94078200 | 4.38599100 | -3.65492800 |

Variable frequencies

|            |          |          |
|------------|----------|----------|
| -1262.0383 | 16.1746  | 20.5469  |
| 25.1169    | 35.5138  | 36.1017  |
| 39.9017    | 41.1800  | 50.8565  |
| 55.1485    | 56.4328  | 76.7188  |
| 84.9173    | 90.8388  | 101.6976 |
| 115.1929   | 127.0458 | 143.2129 |
| 146.6358   | 157.8166 | 195.7448 |
| 200.8941   | 208.9657 | 212.3964 |
| 218.0688   | 233.1155 | 245.6317 |
| 255.3327   | 262.9094 | 280.7346 |
| 289.6121   | 294.5756 | 301.9920 |
| 317.6169   | 328.4778 | 337.0203 |
| 350.6414   | 364.8025 | 376.8616 |
| 387.2602   | 394.3353 | 398.3731 |
| 417.4390   | 424.1780 | 429.8872 |
| 440.9351   | 448.8903 | 463.3026 |
| 481.0151   | 487.4751 | 514.2630 |
| 517.3342   | 528.7897 | 541.5231 |
| 557.4994   | 575.6497 | 597.3811 |
| 604.3766   | 611.7896 | 631.5836 |
| 632.8664   | 648.1932 | 665.8150 |
| 692.8752   | 710.3340 | 715.0349 |
| 725.4019   | 737.3328 | 750.0907 |
| 754.6358   | 759.7308 | 771.5424 |
| 784.1861   | 791.6684 | 808.9837 |
| 820.3354   | 828.6469 | 837.9649 |
| 857.1753   | 869.2799 | 873.0672 |
| 875.6395   | 880.9680 | 882.0620 |
| 892.8394   | 902.6629 | 912.2226 |
| 918.3795   | 946.7618 | 958.2183 |
| 964.5782   | 966.8064 | 973.7346 |



|           |           |           |
|-----------|-----------|-----------|
| 986.1942  | 989.1193  | 999.6371  |
| 1004.2189 | 1010.1629 | 1016.0139 |
| 1021.6024 | 1022.1271 | 1032.9187 |
| 1035.9545 | 1042.6533 | 1050.9160 |
| 1054.2639 | 1061.0297 | 1064.3069 |
| 1065.4502 | 1074.0768 | 1118.1917 |
| 1122.7933 | 1124.2105 | 1134.6419 |
| 1144.9049 | 1156.3884 | 1160.1368 |
| 1177.0019 | 1182.8453 | 1197.4021 |
| 1209.1880 | 1212.0707 | 1213.1862 |
| 1228.7797 | 1234.3242 | 1246.9309 |
| 1249.7741 | 1255.9990 | 1266.1761 |
| 1269.8926 | 1282.3339 | 1283.1223 |
| 1310.7176 | 1314.2861 | 1317.2700 |
| 1327.4652 | 1333.3442 | 1340.0157 |
| 1342.6445 | 1352.4477 | 1355.1468 |
| 1370.6892 | 1371.5246 | 1377.6483 |
| 1388.9513 | 1398.5548 | 1406.6062 |
| 1412.5413 | 1426.8761 | 1430.0487 |
| 1456.3267 | 1465.2373 | 1469.3971 |
| 1481.3545 | 1487.3824 | 1489.0070 |
| 1495.9809 | 1496.6778 | 1502.1997 |
| 1503.5173 | 1506.5819 | 1510.3081 |
| 1516.2371 | 1518.9740 | 1539.4105 |
| 1540.2436 | 1555.6015 | 1562.6488 |
| 1573.2832 | 1583.5851 | 1668.9593 |
| 1678.8699 | 1685.3771 | 1691.3719 |
| 1698.4990 | 1699.5031 | 1721.2918 |
| 1737.1625 | 1751.1787 | 3047.9073 |
| 3051.4692 | 3064.7714 | 3069.0703 |
| 3080.9922 | 3122.6514 | 3131.3297 |
| 3136.6728 | 3142.0878 | 3147.3264 |
| 3159.7847 | 3161.4561 | 3162.4868 |
| 3177.1849 | 3199.3268 | 3199.4040 |
| 3202.2976 | 3203.0107 | 3204.0411 |
| 3213.3390 | 3215.4017 | 3215.4809 |
| 3221.9933 | 3230.2592 | 3231.0073 |
| 3232.9913 | 3236.4753 | 3238.3361 |
| 3247.1701 | 3259.5234 | 3551.8134 |

## M2

Zero-point correction=0.439339

Thermal correction to Energy=0.465753

Thermal correction to Enthalpy=0.466697  
 Thermal correction to Gibbs Free Energy=0.379668  
 Sum of electronic and zero-point Energies=-1815.970908  
 Sum of electronic and thermal Energies=-1815.944494  
 Sum of electronic and thermal Enthalpies=-1815.943550  
 Sum of electronic and thermal Free Energies=-1816.030579

Cartesian coordinate

|   |             |             |             |
|---|-------------|-------------|-------------|
| C | -1.67058900 | 2.24233400  | -0.95156600 |
| C | -1.03046600 | 1.12654700  | -0.53878300 |
| C | 0.24102600  | 0.69368100  | -1.03754600 |
| O | 0.92419900  | 1.53928300  | -1.91599700 |
| H | -1.17880400 | 2.87913800  | -1.68366200 |
| C | -2.98345100 | 2.69001800  | -0.48413100 |
| C | -3.42145900 | 3.98401700  | -0.80471900 |
| C | -3.85261800 | 1.86944300  | 0.25542200  |
| C | -4.66447900 | 4.44950300  | -0.39073000 |
| H | -2.76854200 | 4.63016200  | -1.38596400 |
| C | -5.09145400 | 2.33621700  | 0.67431200  |
| H | -3.56576400 | 0.84668400  | 0.48503600  |
| C | -5.50624100 | 3.62943600  | 0.35611900  |
| H | -4.97615200 | 5.45605600  | -0.65273800 |
| H | -5.74454800 | 1.68218400  | 1.24420200  |
| H | -6.47731600 | 3.98861900  | 0.68070500  |
| H | -1.47915000 | 0.51013000  | 0.23487300  |
| C | 4.38222200  | 0.90431400  | 1.04295200  |
| C | 3.37079200  | 1.26157200  | 0.14604000  |
| C | 2.59217500  | 2.39430400  | 0.37927700  |
| C | 2.82879400  | 3.14422500  | 1.53050600  |
| C | 3.83240500  | 2.78035400  | 2.42806100  |
| C | 4.62171200  | 1.65935300  | 2.18505600  |
| C | 5.10993700  | -0.33258400 | 0.59323100  |
| C | 4.68767100  | -0.45716600 | -0.88536900 |
| C | 3.32404800  | 0.28486500  | -1.01889900 |
| H | 1.82778200  | 2.69674700  | -0.32665000 |
| H | 2.22750200  | 4.02628500  | 1.72587500  |
| H | 4.00608700  | 3.38025800  | 3.31603500  |
| H | 5.41551500  | 1.38130900  | 2.87233500  |
| H | 4.78951500  | -1.19808200 | 1.18372800  |
| H | 5.40778900  | 0.08164700  | -1.50526400 |
| H | 6.19538800  | -0.25870600 | 0.69639100  |
| H | 3.21412800  | 0.78151400  | -1.98203100 |
| N | 2.24649700  | -0.71848000 | -0.90106200 |
| O | 4.66451200  | -1.77111400 | -1.40160800 |

|    |             |             |             |
|----|-------------|-------------|-------------|
| C  | 0.89570900  | -0.45875800 | -0.67918600 |
| C  | 2.48351100  | -1.99994900 | -0.45666700 |
| N  | 0.43519700  | -1.61157900 | -0.05903200 |
| N  | 1.44628300  | -2.56549100 | 0.04943500  |
| C  | 3.81839000  | -2.64613000 | -0.69061100 |
| H  | 4.25827700  | -2.97397900 | 0.25874800  |
| H  | 3.68183100  | -3.52965800 | -1.31830600 |
| C  | -0.89134100 | -2.07922600 | 0.09664900  |
| C  | -1.17716700 | -2.88953800 | 1.19590200  |
| C  | -1.88483800 | -1.79590500 | -0.84254200 |
| C  | -2.45580600 | -3.40348300 | 1.36896900  |
| C  | -3.16968300 | -2.29402800 | -0.66223300 |
| C  | -3.44503300 | -3.09270800 | 0.44268200  |
| H  | -2.68792800 | -4.03145100 | 2.22153700  |
| H  | -3.94943500 | -2.07569500 | -1.38307200 |
| H  | -1.65668300 | -1.18087800 | -1.70521700 |
| H  | -0.38876000 | -3.11578300 | 1.90473800  |
| Cl | -5.05878100 | -3.72004700 | 0.66625300  |
| H  | 0.58041600  | 1.38354000  | -2.80531500 |

#### Variable frequencies

|          |          |          |
|----------|----------|----------|
| 15.1685  | 17.2725  | 21.0860  |
| 28.5078  | 39.6132  | 47.7360  |
| 63.0995  | 73.2287  | 93.3204  |
| 119.9712 | 135.8903 | 148.0079 |
| 176.1728 | 188.0775 | 208.1013 |
| 223.6397 | 230.4236 | 251.7304 |
| 254.7003 | 262.7075 | 276.2380 |
| 293.1490 | 303.1278 | 315.3786 |
| 348.2621 | 356.4729 | 370.9168 |
| 400.6517 | 414.7017 | 417.8564 |
| 424.3141 | 433.8675 | 455.0508 |
| 471.9439 | 483.2810 | 493.7789 |
| 517.0750 | 531.2300 | 539.0699 |
| 562.6642 | 585.4182 | 599.3652 |
| 607.3471 | 626.7800 | 632.6778 |
| 638.6680 | 648.7583 | 668.8927 |
| 693.3027 | 712.2080 | 726.4703 |
| 728.6345 | 754.4745 | 763.2784 |
| 772.3400 | 779.6984 | 825.1428 |
| 846.3757 | 846.6797 | 849.8339 |
| 858.0505 | 862.4755 | 875.0235 |
| 880.3417 | 887.4309 | 903.9506 |
| 915.3486 | 938.1746 | 975.1253 |

|           |           |           |
|-----------|-----------|-----------|
| 978.8689  | 991.0667  | 993.4854  |
| 994.9855  | 1003.5144 | 1005.9104 |
| 1014.0676 | 1015.7180 | 1022.1144 |
| 1032.6234 | 1038.0367 | 1047.2193 |
| 1072.6215 | 1073.8710 | 1091.3797 |
| 1106.4935 | 1121.3805 | 1129.0814 |
| 1134.1754 | 1142.3504 | 1164.1763 |
| 1176.6917 | 1183.8666 | 1184.6978 |
| 1190.8166 | 1200.5542 | 1204.8632 |
| 1211.3360 | 1228.0352 | 1235.9742 |
| 1241.6762 | 1249.7772 | 1257.2044 |
| 1271.5231 | 1302.3941 | 1308.4715 |
| 1324.9106 | 1325.9301 | 1330.4819 |
| 1334.0522 | 1341.5695 | 1344.0298 |
| 1348.2891 | 1352.5850 | 1368.2829 |
| 1370.0440 | 1378.6487 | 1382.0676 |
| 1417.4714 | 1451.8812 | 1471.8929 |
| 1483.2166 | 1495.2188 | 1506.0454 |
| 1515.0477 | 1516.8230 | 1536.5517 |
| 1554.4680 | 1556.6877 | 1661.5253 |
| 1667.4551 | 1676.1166 | 1679.7842 |
| 1692.0659 | 1701.0194 | 1707.7837 |
| 1709.5562 | 1738.3631 | 3080.9202 |
| 3094.3548 | 3131.2960 | 3144.4771 |
| 3150.6711 | 3174.0500 | 3184.4198 |
| 3193.3834 | 3195.5411 | 3197.9394 |
| 3207.1580 | 3207.7983 | 3211.3855 |
| 3215.6451 | 3220.2465 | 3229.3276 |
| 3231.2555 | 3232.9037 | 3238.5770 |
| 3246.4895 | 3252.0623 | 3837.0728 |

### M3<sup>+</sup>

Zero-point correction=0.440804

Thermal correction to Energy=0.466927

Thermal correction to Enthalpy=0.467871

Thermal correction to Gibbs Free Energy=0.380612

Sum of electronic and zero-point Energies=-1815.794269

Sum of electronic and thermal Energies=-1815.768145

Sum of electronic and thermal Enthalpies=-1815.767201

Sum of electronic and thermal Free Energies=-1815.854461

Cartesian coordinate

|   |             |            |             |
|---|-------------|------------|-------------|
| C | -1.71510800 | 1.96420200 | -1.08588300 |
|---|-------------|------------|-------------|

|   |             |             |             |
|---|-------------|-------------|-------------|
| C | -0.93179300 | 0.94987300  | -0.58886700 |
| C | 0.28104400  | 0.53206400  | -1.14384200 |
| O | 0.91006800  | 1.12477400  | -2.18463500 |
| H | -1.40264600 | 2.49971000  | -1.98229900 |
| C | -2.97936700 | 2.40052200  | -0.53155400 |
| C | -3.58199700 | 3.55316100  | -1.06559700 |
| C | -3.64070300 | 1.71277700  | 0.50482400  |
| C | -4.79148800 | 4.01899800  | -0.57027700 |
| H | -3.08477000 | 4.08436100  | -1.87216100 |
| C | -4.85065100 | 2.17899000  | 0.99423200  |
| H | -3.22016300 | 0.79941200  | 0.91523500  |
| C | -5.42801200 | 3.33461200  | 0.46339200  |
| H | -5.23941300 | 4.91327000  | -0.98956100 |
| H | -5.35337600 | 1.63862100  | 1.78911900  |
| H | -6.37478100 | 3.69465600  | 0.85145800  |
| H | -1.24973000 | 0.42003800  | 0.30206800  |
| C | 4.31287900  | 1.06200500  | 1.06521600  |
| C | 3.38293800  | 1.30177500  | 0.04878800  |
| C | 2.61949700  | 2.46653600  | 0.04998100  |
| C | 2.77458200  | 3.37269600  | 1.09567200  |
| C | 3.69053500  | 3.12436700  | 2.11811500  |
| C | 4.47223200  | 1.97167500  | 2.10441700  |
| C | 5.05603200  | -0.22711600 | 0.83986200  |
| C | 4.76907200  | -0.52073700 | -0.64742800 |
| C | 3.41459300  | 0.17662900  | -0.96563800 |
| H | 1.93116300  | 2.68333700  | -0.75659100 |
| H | 2.18804200  | 4.28496100  | 1.10672600  |
| H | 3.80668700  | 3.84423200  | 2.92143500  |
| H | 5.20249500  | 1.79077400  | 2.88674400  |
| H | 4.66576800  | -1.01201000 | 1.49719200  |
| H | 5.52505400  | -0.02537300 | -1.26029200 |
| H | 6.12784400  | -0.14992300 | 1.03318000  |
| H | 3.33315800  | 0.49569400  | -2.00440800 |
| N | 2.33344000  | -0.82516700 | -0.72984600 |
| O | 4.80191900  | -1.87520700 | -1.03611900 |
| C | 0.99230500  | -0.62785800 | -0.68276900 |
| C | 2.55623000  | -2.10502900 | -0.29613200 |
| N | 0.47834800  | -1.77715000 | -0.20407700 |
| N | 1.44785000  | -2.69625700 | 0.04561000  |
| C | 3.92973100  | -2.70683600 | -0.31131000 |
| H | 4.27405600  | -2.89004600 | 0.71325300  |
| H | 3.88880600  | -3.66561100 | -0.83168400 |
| C | -0.89706800 | -2.12429900 | 0.00353900  |
| C | -1.28631500 | -2.54028800 | 1.27104000  |

|    |             |             |             |
|----|-------------|-------------|-------------|
| C  | -1.80015200 | -2.03063700 | -1.05083400 |
| C  | -2.62215800 | -2.85143900 | 1.49725000  |
| C  | -3.13659400 | -2.32769100 | -0.81980400 |
| C  | -3.53572700 | -2.73002800 | 0.45357100  |
| H  | -2.95456300 | -3.18021900 | 2.47473900  |
| H  | -3.86411000 | -2.25555900 | -1.61953800 |
| H  | -1.46691600 | -1.72131000 | -2.03562800 |
| H  | -0.55290300 | -2.61936000 | 2.06609700  |
| Cl | -5.20821700 | -3.08808000 | 0.74459200  |
| H  | 0.51941500  | 1.98764300  | -2.37870400 |

Variable frequencies

|           |           |           |
|-----------|-----------|-----------|
| 11.4605   | 18.0257   | 23.3439   |
| 31.4889   | 36.0605   | 49.4606   |
| 62.4595   | 72.6162   | 88.8021   |
| 117.4518  | 134.2845  | 157.1591  |
| 173.3848  | 192.0611  | 196.3679  |
| 214.2283  | 235.3918  | 248.4368  |
| 260.2215  | 264.7828  | 281.9068  |
| 297.7404  | 327.9495  | 349.6078  |
| 361.9358  | 373.2510  | 401.1836  |
| 409.5765  | 421.7554  | 435.9613  |
| 449.9215  | 461.2770  | 465.6706  |
| 475.3328  | 491.3771  | 496.8896  |
| 520.4810  | 536.1364  | 539.6433  |
| 566.0006  | 586.5688  | 596.3033  |
| 607.1405  | 629.1748  | 633.7468  |
| 652.6096  | 658.0831  | 695.8683  |
| 702.6971  | 725.1448  | 727.2113  |
| 737.7483  | 759.5388  | 765.1494  |
| 776.0818  | 782.2626  | 813.6148  |
| 844.0859  | 848.6544  | 853.2822  |
| 857.6102  | 863.6510  | 874.4267  |
| 884.3895  | 893.1865  | 902.2233  |
| 912.6065  | 954.0821  | 971.2926  |
| 975.7482  | 985.1625  | 998.9050  |
| 1004.0423 | 1005.0271 | 1012.7257 |
| 1019.3672 | 1029.7481 | 1034.9903 |
| 1035.6926 | 1046.9167 | 1055.1811 |
| 1072.1604 | 1076.6326 | 1096.0144 |
| 1121.2423 | 1132.3724 | 1134.5200 |
| 1135.5877 | 1138.2038 | 1160.8679 |
| 1173.1668 | 1191.4432 | 1193.5846 |
| 1198.3689 | 1201.7990 | 1205.9012 |

|           |           |           |
|-----------|-----------|-----------|
| 1216.7883 | 1234.7561 | 1241.1587 |
| 1250.9766 | 1258.4360 | 1272.6802 |
| 1275.2726 | 1296.0682 | 1301.1232 |
| 1322.3739 | 1329.8073 | 1333.8884 |
| 1343.7696 | 1349.8518 | 1355.6885 |
| 1358.7956 | 1368.3201 | 1375.8963 |
| 1379.5945 | 1394.0978 | 1415.3692 |
| 1435.5130 | 1462.3340 | 1469.3749 |
| 1493.1184 | 1500.1653 | 1510.2209 |
| 1524.0340 | 1526.6580 | 1542.6618 |
| 1549.3694 | 1558.3744 | 1569.0001 |
| 1586.4676 | 1663.6834 | 1664.8399 |
| 1680.9241 | 1682.1513 | 1682.4483 |
| 1686.7439 | 1705.4507 | 3078.1198 |
| 3095.4715 | 3139.6102 | 3152.7613 |
| 3164.9840 | 3169.5687 | 3175.8015 |
| 3211.4885 | 3217.8766 | 3218.7730 |
| 3227.2968 | 3229.5508 | 3232.4010 |
| 3237.3949 | 3238.0869 | 3238.5855 |
| 3239.1293 | 3248.2161 | 3249.5855 |
| 3250.3990 | 3256.4253 | 3855.8376 |

### M3-

Zero-point correction=0.425587

Thermal correction to Energy=0.451546

Thermal correction to Enthalpy=0.452490

Thermal correction to Gibbs Free Energy=0.366432

Sum of electronic and zero-point Energies=-1815.456647

Sum of electronic and thermal Energies=-1815.430688

Sum of electronic and thermal Enthalpies=-1815.429743

Sum of electronic and thermal Free Energies=-1815.515802

#### Cartesian coordinate

|   |             |            |             |
|---|-------------|------------|-------------|
| C | -1.61393800 | 2.51144900 | -0.78608900 |
| C | -1.08871600 | 1.34791300 | -0.36232700 |
| C | 0.18376800  | 0.83452100 | -0.90284700 |
| O | 0.86998100  | 1.53106700 | -1.73991700 |
| H | -1.05487100 | 3.04547300 | -1.55188900 |
| C | -2.84838200 | 3.12577200 | -0.29418800 |
| C | -3.10996500 | 4.47856100 | -0.56500600 |
| C | -3.81263500 | 2.41080000 | 0.43819000  |
| C | -4.26610900 | 5.09920800 | -0.10450300 |
| H | -2.38217900 | 5.04492500 | -1.14061400 |

|    |             |             |             |
|----|-------------|-------------|-------------|
| C  | -4.96583000 | 3.03067700  | 0.90123600  |
| H  | -3.66026800 | 1.35120000  | 0.62386400  |
| C  | -5.20072300 | 4.38049800  | 0.63703100  |
| H  | -4.43836300 | 6.14885000  | -0.32557800 |
| H  | -5.69437500 | 2.45365400  | 1.46364600  |
| H  | -6.10544500 | 4.86087000  | 0.99658600  |
| H  | -1.56802200 | 0.77800300  | 0.43202600  |
| C  | 5.01835000  | 0.59807500  | 0.06898600  |
| C  | 3.66120100  | 0.81922500  | -0.16349000 |
| C  | 3.01354400  | 1.92743400  | 0.38024000  |
| C  | 3.74242500  | 2.77528200  | 1.21367400  |
| C  | 5.09255300  | 2.53611900  | 1.47828500  |
| C  | 5.74459000  | 1.45207600  | 0.89395900  |
| C  | 5.51642200  | -0.58839600 | -0.71764300 |
| C  | 4.24070300  | -1.29072300 | -1.23519700 |
| C  | 3.07448300  | -0.25046000 | -1.07054300 |
| H  | 1.98577000  | 2.13676500  | 0.10181100  |
| H  | 3.25606800  | 3.64031400  | 1.65459800  |
| H  | 5.64276300  | 3.20807000  | 2.13080400  |
| H  | 6.80228600  | 1.27915800  | 1.07562000  |
| H  | 6.11610300  | -1.29076000 | -0.12897200 |
| H  | 4.33896100  | -1.58900200 | -2.28044600 |
| H  | 6.13910800  | -0.25635600 | -1.55628500 |
| H  | 2.77196000  | 0.19528200  | -2.01915300 |
| N  | 1.90306800  | -0.92918600 | -0.53941800 |
| O  | 4.01514900  | -2.51582300 | -0.54503000 |
| C  | 0.59210400  | -0.38779900 | -0.41107700 |
| C  | 2.04743200  | -1.79125900 | 0.50724200  |
| N  | -0.03454600 | -1.28062600 | 0.52022700  |
| N  | 0.97536200  | -2.05993700 | 1.16566600  |
| C  | 3.41456200  | -2.35558400 | 0.72598400  |
| H  | 4.00991300  | -1.69289400 | 1.37221700  |
| H  | 3.35058900  | -3.33958200 | 1.19280100  |
| C  | -1.24361800 | -1.94169200 | 0.32232800  |
| C  | -1.63074500 | -2.97369900 | 1.20012400  |
| C  | -2.12476700 | -1.58486800 | -0.71498900 |
| C  | -2.85686700 | -3.60568600 | 1.05557300  |
| C  | -3.34803200 | -2.22485900 | -0.85914100 |
| C  | -3.71604200 | -3.22696700 | 0.02972100  |
| H  | -3.14580100 | -4.39822800 | 1.73812000  |
| H  | -4.01264700 | -1.94451500 | -1.66956700 |
| H  | -1.83643400 | -0.81056700 | -1.41466500 |
| H  | -0.95015600 | -3.27526300 | 1.98561900  |
| Cl | -5.27340000 | -4.02428200 | -0.14232200 |



### Variable frequencies

|           |           |           |
|-----------|-----------|-----------|
| 11.7690   | 15.0182   | 29.1398   |
| 37.9239   | 46.3307   | 54.2958   |
| 73.1188   | 78.5769   | 94.2321   |
| 96.0362   | 124.9636  | 138.6604  |
| 158.9230  | 182.5462  | 199.7910  |
| 211.4089  | 237.2342  | 254.0877  |
| 265.5278  | 277.6673  | 293.6748  |
| 303.5008  | 308.3303  | 347.4125  |
| 362.0216  | 386.2095  | 396.6567  |
| 416.9097  | 429.0603  | 430.6918  |
| 441.6276  | 455.1140  | 478.6546  |
| 494.7658  | 504.1269  | 519.5090  |
| 526.0441  | 535.7847  | 561.3266  |
| 581.4952  | 597.6757  | 604.3294  |
| 628.5009  | 638.9083  | 647.3703  |
| 662.6591  | 674.4458  | 707.8291  |
| 713.6587  | 718.8892  | 727.8673  |
| 747.0735  | 763.4034  | 774.3037  |
| 781.8727  | 809.8272  | 833.1344  |
| 838.3394  | 841.3067  | 852.4774  |
| 869.0743  | 875.8416  | 886.0870  |
| 889.1081  | 895.6872  | 908.1388  |
| 938.9318  | 941.3988  | 962.2118  |
| 972.7268  | 977.1889  | 989.9305  |
| 992.8367  | 1005.8536 | 1007.5912 |
| 1013.5017 | 1013.8386 | 1023.5418 |
| 1026.2483 | 1038.2527 | 1049.6552 |
| 1061.1676 | 1070.0288 | 1073.1037 |
| 1112.4838 | 1115.0296 | 1130.5430 |
| 1138.7961 | 1147.5523 | 1150.2470 |
| 1170.0098 | 1170.8319 | 1177.2721 |
| 1195.9202 | 1199.8225 | 1202.5114 |
| 1209.5927 | 1227.5750 | 1236.6249 |
| 1247.6891 | 1280.5316 | 1284.5002 |
| 1304.5546 | 1315.1345 | 1316.1136 |
| 1321.8756 | 1332.2407 | 1337.4989 |
| 1344.3348 | 1348.3087 | 1362.9362 |
| 1364.2251 | 1374.6797 | 1376.5102 |
| 1390.2429 | 1414.2207 | 1457.7340 |
| 1473.6700 | 1488.2627 | 1498.5979 |
| 1504.8428 | 1507.8886 | 1515.3192 |
| 1537.8538 | 1549.3610 | 1551.7995 |

|           |           |           |
|-----------|-----------|-----------|
| 1647.2395 | 1658.8270 | 1668.1226 |
| 1678.9675 | 1679.1517 | 1696.6988 |
| 1698.1001 | 1712.1552 | 1737.3622 |
| 3044.6584 | 3069.9669 | 3115.5456 |
| 3136.1153 | 3161.1008 | 3163.8729 |
| 3183.6882 | 3185.5850 | 3186.0916 |
| 3189.9709 | 3195.2656 | 3197.9288 |
| 3200.6738 | 3209.2994 | 3210.6033 |
| 3210.7474 | 3215.1277 | 3216.8811 |
| 3241.1525 | 3249.2156 | 3259.2177 |

**R2 + PivO<sup>-</sup>**

Zero-point correction=0.485371

Thermal correction to Energy=0.516098

Thermal correction to Enthalpy=0.517042

Thermal correction to Gibbs Free Energy=0.421211

Sum of electronic and zero-point Energies=-1738.844939

Sum of electronic and thermal Energies=-1738.814212

Sum of electronic and thermal Enthalpies=-1738.813267

Sum of electronic and thermal Free Energies=-1738.909098

Cartesian coordinate

|   |             |             |             |
|---|-------------|-------------|-------------|
| S | -0.75287500 | -0.63670900 | -1.20167100 |
| O | 0.28593300  | -1.54911600 | -1.64217900 |
| O | -1.17333800 | 0.48219300  | -2.02943500 |
| N | -0.29938300 | 0.10110200  | 0.30191300  |
| N | 0.34089000  | 1.33219200  | 0.06617100  |
| C | -2.03897600 | -2.94583500 | -0.52433400 |
| H | -1.10225700 | -3.43867100 | -0.76391600 |
| C | -3.14779000 | -3.66051300 | -0.08488000 |
| H | -3.07907400 | -4.73856800 | 0.02535000  |
| C | -2.15177200 | -1.56564900 | -0.65610700 |
| C | -3.33338200 | -0.88699800 | -0.36775300 |
| H | -3.39348900 | 0.19056900  | -0.49010100 |
| C | -4.34959500 | -3.01277800 | 0.21619800  |
| C | -4.42551800 | -1.62190600 | 0.07084100  |
| H | -5.35394600 | -1.10802600 | 0.30340100  |
| C | -5.55280800 | -3.80106600 | 0.65981900  |
| H | -6.19739300 | -3.20618500 | 1.31036400  |
| H | -5.25814500 | -4.70636200 | 1.19459200  |
| H | -6.14731900 | -4.10602900 | -0.20739400 |
| C | 1.66635300  | 1.36008400  | -0.20517900 |
| H | 2.25051200  | 0.40932800  | -0.14955000 |

|   |             |             |             |
|---|-------------|-------------|-------------|
| C | -0.45700400 | 2.44193300  | 0.05534500  |
| C | 0.13194800  | 3.65061100  | -0.27437700 |
| H | -0.49283800 | 4.53547400  | -0.27862900 |
| C | 2.27068500  | 2.57053000  | -0.50173600 |
| H | 3.34126100  | 2.52813200  | -0.67213100 |
| C | 1.49551800  | 3.72008400  | -0.55678600 |
| H | 1.94494200  | 4.67631600  | -0.80388300 |
| C | 0.40672300  | -0.78937300 | 1.24220200  |
| H | -0.25748900 | -1.63895500 | 1.41316900  |
| H | 1.38234300  | -1.12602300 | 0.87855900  |
| H | 0.51662500  | -0.24380500 | 2.18152300  |
| C | -1.89514500 | 2.34318400  | 0.39713900  |
| C | -2.31684300 | 1.81126800  | 1.61990900  |
| C | -2.83416700 | 2.84689900  | -0.50552800 |
| C | -3.67034700 | 1.78307600  | 1.93218500  |
| H | -1.58519300 | 1.42335000  | 2.32167500  |
| C | -4.19075300 | 2.80874400  | -0.19116000 |
| H | -2.50017500 | 3.23384200  | -1.46320100 |
| C | -4.60901800 | 2.27861100  | 1.02666400  |
| H | -3.99442400 | 1.37321000  | 2.88282800  |
| H | -4.91744400 | 3.18972500  | -0.90056600 |
| H | -5.66564600 | 2.25211900  | 1.27261900  |
| C | 5.75528200  | -1.14107800 | 0.43161200  |
| C | 6.60981600  | -1.15669600 | -0.84144000 |
| H | 7.55733700  | -1.67971700 | -0.66596000 |
| H | 6.08556200  | -1.66691600 | -1.65661600 |
| H | 6.82222700  | -0.13304800 | -1.15854600 |
| C | 5.41349200  | -2.56701200 | 0.85476300  |
| H | 6.32887000  | -3.13348800 | 1.06457800  |
| H | 4.78997300  | -2.56611500 | 1.75301100  |
| H | 4.85451500  | -3.08073700 | 0.06854800  |
| C | 6.52712600  | -0.42484200 | 1.54521500  |
| H | 6.72357900  | 0.60909900  | 1.25237900  |
| H | 5.94965400  | -0.41366200 | 2.47654800  |
| H | 7.48014000  | -0.92926300 | 1.74412200  |
| C | 4.47656900  | -0.31454700 | 0.12943200  |
| O | 4.64918100  | 0.88366000  | -0.19121000 |
| O | 3.36201900  | -0.90570000 | 0.22346300  |

#### Variable frequencies

|         |         |         |
|---------|---------|---------|
| 17.0472 | 22.1813 | 28.0471 |
| 36.6103 | 45.7012 | 49.3294 |
| 60.1974 | 64.7113 | 71.4978 |
| 79.9130 | 80.0718 | 93.0648 |

|           |           |           |
|-----------|-----------|-----------|
| 99.2884   | 113.6105  | 119.8189  |
| 136.8504  | 147.9954  | 162.4340  |
| 175.2704  | 213.6176  | 217.7754  |
| 231.1947  | 248.8107  | 254.1880  |
| 279.5076  | 287.7161  | 291.1683  |
| 296.9356  | 305.2529  | 311.1374  |
| 324.1971  | 334.1872  | 352.0665  |
| 366.8145  | 376.7584  | 380.8921  |
| 383.1406  | 412.6141  | 417.9953  |
| 438.1484  | 459.5709  | 489.6347  |
| 511.4163  | 520.9156  | 540.9522  |
| 564.1004  | 570.9044  | 580.1197  |
| 593.4629  | 601.3982  | 626.7376  |
| 637.2083  | 642.8859  | 672.7547  |
| 704.5132  | 719.5592  | 720.7272  |
| 758.2539  | 774.8546  | 800.2430  |
| 804.0405  | 814.4943  | 830.7414  |
| 840.0816  | 843.7589  | 859.7988  |
| 870.9716  | 885.6884  | 907.8927  |
| 958.4701  | 960.6327  | 963.1120  |
| 966.7045  | 975.9818  | 988.2878  |
| 1005.5995 | 1011.2829 | 1015.3751 |
| 1016.7423 | 1033.6739 | 1034.4584 |
| 1044.6356 | 1053.0585 | 1055.9861 |
| 1056.1980 | 1068.2591 | 1073.2171 |
| 1082.6633 | 1103.9244 | 1120.6243 |
| 1124.2521 | 1127.1897 | 1144.8997 |
| 1149.8735 | 1165.7360 | 1184.6142 |
| 1187.2713 | 1192.7046 | 1211.6277 |
| 1213.3581 | 1229.3803 | 1253.7884 |
| 1257.2165 | 1264.6281 | 1265.4498 |
| 1285.1016 | 1318.4995 | 1330.6761 |
| 1334.3721 | 1340.8098 | 1357.2730 |
| 1361.1680 | 1366.8061 | 1390.7752 |
| 1393.8575 | 1400.4200 | 1418.1046 |
| 1426.1849 | 1455.6058 | 1462.6444 |
| 1472.5879 | 1477.5673 | 1486.1582 |
| 1494.7156 | 1500.4679 | 1501.8726 |
| 1502.1843 | 1505.1468 | 1508.7442 |
| 1510.1617 | 1514.8110 | 1526.1262 |
| 1537.5551 | 1546.4861 | 1551.0149 |
| 1582.2224 | 1651.3898 | 1669.4109 |
| 1669.9820 | 1690.7995 | 1692.7362 |
| 1702.8923 | 1713.0127 | 2717.2610 |

|           |           |           |
|-----------|-----------|-----------|
| 3047.2243 | 3051.6235 | 3057.4549 |
| 3074.9707 | 3079.6591 | 3118.9941 |
| 3127.4236 | 3136.8096 | 3151.9145 |
| 3156.8189 | 3160.4624 | 3161.2445 |
| 3174.2563 | 3174.4813 | 3179.8900 |
| 3203.8047 | 3216.5002 | 3218.2251 |
| 3227.0768 | 3227.1793 | 3230.9015 |
| 3232.6986 | 3236.8920 | 3239.7716 |
| 3246.7596 | 3248.5053 | 3267.7079 |

### M3

Zero-point correction=0.927188

Thermal correction to Energy=0.984850

Thermal correction to Enthalpy=0.985794

Thermal correction to Gibbs Free Energy=0.830684

Sum of electronic and zero-point Energies=-3554.855818

Sum of electronic and thermal Energies=-3554.798156

Sum of electronic and thermal Enthalpies=-3554.797211

Sum of electronic and thermal Free Energies=-3554.952322

#### Cartesian coordinate

|   |            |             |             |
|---|------------|-------------|-------------|
| C | 4.66194000 | -0.51056600 | -0.28233200 |
| C | 3.45123300 | -0.19075700 | -0.77762800 |
| C | 2.62265900 | 0.84458800  | -0.18878900 |
| O | 3.11668200 | 1.58477900  | 0.84198800  |
| H | 5.01252400 | -0.00060100 | 0.61121600  |
| C | 5.55129000 | -1.55566800 | -0.79830900 |
| C | 6.57978600 | -2.01631700 | 0.03959100  |
| C | 5.41299700 | -2.13571700 | -2.06856400 |
| C | 7.43070900 | -3.03567900 | -0.37534600 |
| H | 6.67668000 | -1.57163900 | 1.02811300  |
| C | 6.26586100 | -3.15225200 | -2.48037100 |
| H | 4.64068500 | -1.77855500 | -2.74403400 |
| C | 7.27781600 | -3.60900500 | -1.63600700 |
| H | 8.21592000 | -3.38388200 | 0.28913500  |
| H | 6.14559900 | -3.58792100 | -3.46781600 |
| H | 7.94294600 | -4.40262800 | -1.96173300 |
| H | 3.06754300 | -0.69602200 | -1.65966300 |
| C | 1.77997400 | 5.76610600  | -0.72679700 |
| C | 2.19870000 | 4.44027300  | -0.63660100 |
| C | 3.36207600 | 4.00567300  | -1.26779600 |
| C | 4.08196900 | 4.92410500  | -2.02838500 |
| C | 3.65444700 | 6.24911500  | -2.13991500 |

|    |             |             |             |
|----|-------------|-------------|-------------|
| C  | 2.50580800  | 6.68266900  | -1.48232200 |
| C  | 0.54036200  | 6.00635300  | 0.09886600  |
| C  | 0.06054900  | 4.60097800  | 0.52793200  |
| C  | 1.25156600  | 3.62227300  | 0.21551000  |
| H  | 3.70594900  | 2.98285400  | -1.15075300 |
| H  | 4.98968500  | 4.60858700  | -2.53240700 |
| H  | 4.22965700  | 6.94983800  | -2.73690600 |
| H  | 2.18361200  | 7.71739400  | -1.55659000 |
| H  | -0.25748500 | 6.52418000  | -0.44384000 |
| H  | -0.18921800 | 4.57186400  | 1.59098100  |
| H  | 0.77357500  | 6.61321700  | 0.97985500  |
| H  | 1.74735000  | 3.28852200  | 1.12618800  |
| N  | 0.74326000  | 2.42742700  | -0.45915700 |
| O  | -1.15600100 | 4.23351900  | -0.12377900 |
| C  | 1.42475900  | 1.22010300  | -0.72348900 |
| C  | -0.19242500 | 2.56795900  | -1.44834200 |
| N  | 0.65759600  | 0.64108400  | -1.76283800 |
| N  | -0.32300000 | 1.54326000  | -2.21371500 |
| C  | -0.95613300 | 3.85132400  | -1.47377400 |
| H  | -0.39778800 | 4.62005200  | -2.02627700 |
| H  | -1.93008200 | 3.72368100  | -1.94819400 |
| C  | 0.41237100  | -0.71622800 | -2.02481000 |
| C  | -0.27735800 | -1.05670200 | -3.19803100 |
| C  | 0.80973000  | -1.73386800 | -1.14816600 |
| C  | -0.58821300 | -2.38147200 | -3.47026400 |
| C  | 0.48653900  | -3.05842200 | -1.41697800 |
| C  | -0.21657300 | -3.37650300 | -2.57234400 |
| H  | -1.12358200 | -2.64220000 | -4.37689100 |
| H  | 0.78586600  | -3.83990900 | -0.72614300 |
| H  | 1.37797500  | -1.48902500 | -0.25924700 |
| H  | -0.57573700 | -0.27153600 | -3.88178600 |
| Cl | -0.64433400 | -5.03880200 | -2.89976700 |
| S  | -4.52659400 | 0.81034000  | 1.79344900  |
| O  | -4.83367300 | 2.19095900  | 2.13353300  |
| O  | -4.00720000 | -0.11051200 | 2.78812600  |
| N  | -3.32796400 | 0.79643400  | 0.54586000  |
| N  | -2.04576200 | 0.61909500  | 1.07864700  |
| C  | -6.97015200 | 0.89942600  | 0.58766500  |
| H  | -6.98236100 | 1.94551600  | 0.87536700  |
| C  | -8.02976100 | 0.32050300  | -0.10470700 |
| H  | -8.89070000 | 0.92669100  | -0.36813500 |
| C  | -5.88217000 | 0.09995100  | 0.91782400  |
| C  | -5.82280500 | -1.25346800 | 0.58229900  |
| H  | -4.96377000 | -1.85696200 | 0.86196300  |

|   |             |             |             |
|---|-------------|-------------|-------------|
| C | -8.00285200 | -1.02901400 | -0.46342300 |
| C | -6.88826900 | -1.80436500 | -0.11122200 |
| H | -6.85758000 | -2.85533200 | -0.38494800 |
| C | -1.42339500 | 1.65899700  | 1.69051600  |
| H | -1.93653900 | 2.61244500  | 1.63793100  |
| C | -1.54246600 | -0.65161200 | 1.08709900  |
| C | -0.33124800 | -0.85497200 | 1.72987700  |
| H | 0.08047400  | -1.85778700 | 1.72598400  |
| C | -0.20869300 | 1.47134300  | 2.30438000  |
| H | 0.28468200  | 2.31322800  | 2.77424800  |
| C | 0.36778300  | 0.19846800  | 2.30986000  |
| H | 1.35969200  | 0.02640500  | 2.73591300  |
| C | -3.44815600 | 1.84364700  | -0.47112400 |
| H | -2.74228200 | 1.60717400  | -1.27112800 |
| H | -4.46524400 | 1.78827400  | -0.86448200 |
| H | -3.26112600 | 2.84967100  | -0.08035100 |
| C | -2.26835600 | -1.74910400 | 0.42102800  |
| C | -2.70726300 | -1.63141700 | -0.90119200 |
| C | -2.45481500 | -2.94642000 | 1.11720300  |
| C | -3.33531100 | -2.70557400 | -1.51717800 |
| H | -2.52442600 | -0.71507900 | -1.45349800 |
| C | -3.09454600 | -4.01636700 | 0.49682800  |
| H | -2.12195400 | -3.02769800 | 2.14759500  |
| C | -3.53438800 | -3.89625500 | -0.81924100 |
| H | -3.65587900 | -2.61847600 | -2.55013900 |
| H | -3.24549200 | -4.94213000 | 1.04121300  |
| H | -4.01886300 | -4.73514200 | -1.30792000 |
| C | 4.28605500  | -0.83679800 | 2.90284300  |
| O | 5.46752800  | -0.49724300 | 2.79779600  |
| O | 3.26895900  | -0.08516100 | 2.66642100  |
| H | 3.30602700  | 0.94032800  | 1.64325100  |
| C | 3.92456100  | -2.28813700 | 3.29695300  |
| C | 3.21092600  | -2.91429300 | 2.09009800  |
| H | 2.88763100  | -3.93701800 | 2.31755300  |
| H | 2.33550600  | -2.31149700 | 1.82421700  |
| H | 3.87322500  | -2.94474000 | 1.21783200  |
| C | 5.18463600  | -3.08344900 | 3.62767900  |
| H | 5.73507700  | -2.61171000 | 4.44589800  |
| H | 4.92453900  | -4.10710500 | 3.92042900  |
| H | 5.84985800  | -3.12577800 | 2.76129500  |
| C | 2.97659100  | -2.27067500 | 4.50074400  |
| H | 2.69536000  | -3.29262600 | 4.77991700  |
| H | 3.45172500  | -1.80112500 | 5.36825800  |
| H | 2.06612900  | -1.71063700 | 4.26909300  |

|   |             |             |             |
|---|-------------|-------------|-------------|
| C | -9.14653200 | -1.65463500 | -1.21528500 |
| H | -8.80514900 | -2.05239000 | -2.17528600 |
| H | -9.57076100 | -2.48830700 | -0.64863500 |
| H | -9.94044400 | -0.93092100 | -1.40643300 |

Variable frequencies

|          |          |          |
|----------|----------|----------|
| 11.8299  | 16.1373  | 19.8415  |
| 22.1160  | 24.3542  | 27.7838  |
| 31.3637  | 31.9702  | 37.4827  |
| 37.7865  | 41.3268  | 44.6995  |
| 53.3980  | 55.3277  | 60.0303  |
| 63.2255  | 67.6412  | 69.9720  |
| 75.6507  | 78.2043  | 85.2328  |
| 86.7467  | 91.1439  | 99.4394  |
| 103.7302 | 112.5740 | 118.2101 |
| 128.5106 | 134.5235 | 139.7984 |
| 145.3281 | 151.4611 | 154.6318 |
| 160.3827 | 170.8096 | 181.8938 |
| 189.8188 | 202.4790 | 206.8547 |
| 214.1595 | 218.5276 | 230.4119 |
| 232.3652 | 237.6992 | 249.4499 |
| 263.1676 | 268.1358 | 269.3954 |
| 271.7096 | 272.6245 | 275.9902 |
| 282.0439 | 296.0595 | 298.5675 |
| 299.6027 | 304.1367 | 312.6193 |
| 315.8176 | 323.7909 | 335.3313 |
| 340.4922 | 352.4701 | 356.5445 |
| 360.9835 | 366.0111 | 379.3551 |
| 384.8726 | 389.5728 | 400.6779 |
| 416.6147 | 418.4413 | 419.0226 |
| 420.9440 | 430.9901 | 433.4459 |
| 436.8210 | 446.4289 | 457.3338 |
| 465.0198 | 484.2775 | 487.7692 |
| 491.7825 | 504.8630 | 507.1590 |
| 517.7819 | 521.7022 | 532.3917 |
| 542.8318 | 554.0283 | 557.6997 |
| 559.2509 | 564.1700 | 584.7240 |
| 585.7833 | 587.8049 | 597.8453 |
| 602.0203 | 607.0423 | 626.1074 |
| 626.8840 | 632.1783 | 637.3594 |
| 643.1500 | 643.2629 | 661.7785 |
| 674.1255 | 681.4726 | 703.0603 |
| 711.7142 | 715.9024 | 717.5910 |
| 720.4486 | 721.6331 | 725.9569 |



|           |           |           |
|-----------|-----------|-----------|
| 743.2303  | 752.5879  | 763.9479  |
| 770.5954  | 774.0134  | 781.0114  |
| 788.9291  | 802.9997  | 804.6088  |
| 814.8419  | 818.5535  | 833.8159  |
| 837.7690  | 844.7223  | 847.2666  |
| 860.3773  | 862.4706  | 866.8618  |
| 869.6283  | 875.5313  | 876.0277  |
| 880.9783  | 887.1303  | 892.2929  |
| 898.5989  | 902.0067  | 910.2249  |
| 912.8985  | 949.5771  | 952.5099  |
| 954.0141  | 954.7567  | 956.2916  |
| 963.1773  | 973.5663  | 980.3250  |
| 993.6237  | 994.4440  | 996.2008  |
| 999.7825  | 1004.4283 | 1005.6143 |
| 1012.8856 | 1015.2867 | 1015.6069 |
| 1015.9528 | 1017.8961 | 1023.9713 |
| 1027.5739 | 1029.0165 | 1032.4952 |
| 1035.7322 | 1045.8697 | 1049.3585 |
| 1052.0330 | 1053.3472 | 1053.8464 |
| 1058.0816 | 1068.0561 | 1069.4690 |
| 1076.1853 | 1079.1900 | 1085.0691 |
| 1086.9791 | 1095.2662 | 1114.7437 |
| 1118.3082 | 1121.6173 | 1122.9880 |
| 1126.6212 | 1133.9271 | 1143.7858 |
| 1150.1082 | 1151.6142 | 1159.4797 |
| 1166.6831 | 1169.4658 | 1176.5438 |
| 1178.7790 | 1181.6027 | 1185.9471 |
| 1186.1463 | 1189.1169 | 1200.8696 |
| 1204.6122 | 1213.5003 | 1217.6419 |
| 1218.4118 | 1219.6684 | 1226.5493 |
| 1234.4915 | 1241.9737 | 1252.7587 |
| 1254.2380 | 1255.6987 | 1261.3369 |
| 1261.9771 | 1277.3284 | 1277.4529 |
| 1287.4443 | 1291.3698 | 1309.4398 |
| 1315.4615 | 1320.9179 | 1321.7759 |
| 1327.1560 | 1334.6242 | 1336.4212 |
| 1337.7048 | 1341.6866 | 1347.1380 |
| 1349.4603 | 1356.2137 | 1358.6280 |
| 1360.2190 | 1363.0801 | 1369.2911 |
| 1372.1070 | 1375.1217 | 1376.4103 |
| 1380.2281 | 1388.7997 | 1390.0690 |
| 1395.9103 | 1416.8627 | 1421.3508 |
| 1423.1644 | 1431.9853 | 1447.2766 |
| 1458.6567 | 1468.1258 | 1469.7917 |

|           |           |           |
|-----------|-----------|-----------|
| 1483.0964 | 1484.5725 | 1486.0560 |
| 1492.5397 | 1495.0848 | 1495.7494 |
| 1497.5641 | 1502.9593 | 1503.9365 |
| 1504.7227 | 1505.1323 | 1507.1069 |
| 1510.5794 | 1512.3036 | 1513.6669 |
| 1518.1710 | 1528.9896 | 1530.3510 |
| 1538.6932 | 1542.5423 | 1551.2247 |
| 1552.5517 | 1558.2251 | 1579.2025 |
| 1642.9675 | 1659.2702 | 1665.2754 |
| 1667.3414 | 1674.8767 | 1681.8879 |
| 1683.5550 | 1689.5800 | 1689.9385 |
| 1694.1804 | 1698.3012 | 1699.6259 |
| 1712.8922 | 1719.9457 | 1741.7835 |
| 1755.5601 | 2386.6269 | 3047.8084 |
| 3054.6253 | 3062.6737 | 3071.1809 |
| 3071.9341 | 3076.0737 | 3087.9218 |
| 3127.1876 | 3129.2214 | 3129.9816 |
| 3136.5929 | 3138.9992 | 3142.6903 |
| 3144.2552 | 3147.5492 | 3147.8241 |
| 3162.7025 | 3165.0155 | 3165.7145 |
| 3174.4893 | 3177.4845 | 3180.6228 |
| 3193.1012 | 3195.9767 | 3197.8693 |
| 3203.6640 | 3208.1926 | 3208.6303 |
| 3209.3830 | 3211.6185 | 3214.6930 |
| 3217.0330 | 3217.3997 | 3217.8840 |
| 3221.9844 | 3222.4028 | 3224.5611 |
| 3226.7322 | 3227.6657 | 3233.1838 |
| 3234.4119 | 3235.8731 | 3240.4024 |
| 3243.1793 | 3243.2294 | 3252.0415 |
| 3255.0535 | 3258.5511 | 3266.3713 |

### **<sup>os</sup>TS3**

Zero-point correction=0.923437

Thermal correction to Energy=0.980861

Thermal correction to Enthalpy=0.981805

Thermal correction to Gibbs Free Energy=0.827084

Sum of electronic and zero-point Energies=-3554.854888

Sum of electronic and thermal Energies=-3554.797463

Sum of electronic and thermal Enthalpies=-3554.796519

Sum of electronic and thermal Free Energies=-3554.951241

Cartesian coordinate

|   |             |            |             |
|---|-------------|------------|-------------|
| C | -4.54497300 | 0.32683600 | -0.28067400 |
|---|-------------|------------|-------------|

|   |             |             |             |
|---|-------------|-------------|-------------|
| C | -3.27228300 | 0.22338200  | -0.71678000 |
| C | -2.39664300 | -0.80942300 | -0.17882700 |
| O | -2.84267500 | -1.62888500 | 0.73966100  |
| H | -4.88339100 | -0.39403000 | 0.45831100  |
| C | -5.53797700 | 1.32568600  | -0.67307200 |
| C | -6.76805400 | 1.31907200  | 0.00556800  |
| C | -5.32201200 | 2.30825300  | -1.65310100 |
| C | -7.74969000 | 2.25950300  | -0.28550500 |
| H | -6.92715100 | 0.57149600  | 0.77968600  |
| C | -6.30617700 | 3.24356200  | -1.94518200 |
| H | -4.37651600 | 2.34277200  | -2.18768700 |
| C | -7.52419300 | 3.22477200  | -1.26430200 |
| H | -8.69167700 | 2.23959500  | 0.25401500  |
| H | -6.12426600 | 3.99533900  | -2.70718300 |
| H | -8.28851700 | 3.96051500  | -1.49362200 |
| H | -2.90254400 | 0.86982400  | -1.50451200 |
| C | -1.41685900 | -5.65960200 | -1.04434400 |
| C | -1.86184800 | -4.34550100 | -0.92180300 |
| C | -3.00868900 | -3.90484800 | -1.57664800 |
| C | -3.68758600 | -4.80538500 | -2.39407100 |
| C | -3.23492000 | -6.11918200 | -2.53688700 |
| C | -2.10182300 | -6.55894100 | -1.85649000 |
| C | -0.20344600 | -5.90680400 | -0.18247900 |
| C | 0.24094700  | -4.50787700 | 0.30381200  |
| C | -0.96827800 | -3.54955300 | 0.00417500  |
| H | -3.37248500 | -2.89207600 | -1.43272100 |
| H | -4.58281200 | -4.48642800 | -2.91792100 |
| H | -3.77836300 | -6.80672000 | -3.17742200 |
| H | -1.76015100 | -7.58509900 | -1.95721000 |
| H | 0.62043200  | -6.39712900 | -0.71119600 |
| H | 0.46808100  | -4.50510100 | 1.37186600  |
| H | -0.45965300 | -6.54174100 | 0.67208700  |
| H | -1.50410800 | -3.27944700 | 0.91167400  |
| N | -0.48777300 | -2.30281400 | -0.59590100 |
| O | 1.46123300  | -4.09898200 | -0.31121200 |
| C | -1.14406200 | -1.07575900 | -0.74752300 |
| C | 0.50996000  | -2.34496100 | -1.52111200 |
| N | -0.32680900 | -0.39964400 | -1.67091500 |
| N | 0.67164900  | -1.23686800 | -2.16106000 |
| C | 1.28267100  | -3.61747200 | -1.62998100 |
| H | 0.73728600  | -4.34296900 | -2.25057400 |
| H | 2.26372900  | -3.44815200 | -2.07443100 |
| C | -0.26495800 | 0.94610300  | -2.07385300 |
| C | 0.39613200  | 1.25316300  | -3.27090600 |

|    |             |             |             |
|----|-------------|-------------|-------------|
| C  | -0.78067200 | 1.98759700  | -1.29327000 |
| C  | 0.58477900  | 2.57538400  | -3.64925800 |
| C  | -0.58320200 | 3.30890800  | -1.66807800 |
| C  | 0.10921700  | 3.59858200  | -2.83948100 |
| H  | 1.10763700  | 2.81025200  | -4.56979300 |
| H  | -0.96229200 | 4.11254100  | -1.04636300 |
| H  | -1.31692100 | 1.76247600  | -0.38137400 |
| H  | 0.78300900  | 0.44971500  | -3.88438300 |
| Cl | 0.38167600  | 5.26241200  | -3.29589400 |
| S  | 4.53681400  | -0.56192900 | 1.89590700  |
| O  | 4.84665100  | -1.90379100 | 2.37276500  |
| O  | 3.90091000  | 0.41050800  | 2.76807100  |
| N  | 3.48862400  | -0.65781600 | 0.53276900  |
| N  | 2.15116800  | -0.49005200 | 0.88083000  |
| C  | 7.12282700  | -0.64743600 | 1.02166600  |
| H  | 7.13279200  | -1.65999800 | 1.41138600  |
| C  | 8.24284800  | -0.08854000 | 0.41227900  |
| H  | 9.15142800  | -0.67613700 | 0.32242900  |
| C  | 5.97352900  | 0.12558400  | 1.13037500  |
| C  | 5.91175400  | 1.43427700  | 0.65045600  |
| H  | 5.00153100  | 2.01845400  | 0.75348100  |
| C  | 8.21583900  | 1.21671500  | -0.08323800 |
| C  | 7.03788300  | 1.96644900  | 0.04267000  |
| H  | 7.00363200  | 2.98175600  | -0.34244000 |
| C  | 1.49441700  | -1.49029800 | 1.55974200  |
| H  | 2.02739500  | -2.43203500 | 1.62393600  |
| C  | 1.63608300  | 0.79808700  | 0.81962200  |
| C  | 0.41391200  | 1.03059700  | 1.40820900  |
| H  | 0.02023600  | 2.03832600  | 1.35821800  |
| C  | 0.25467900  | -1.27304900 | 2.08924200  |
| H  | -0.25697600 | -2.08331500 | 2.59449100  |
| C  | -0.34609900 | -0.00392500 | 1.96141100  |
| H  | -1.33296200 | 0.18155600  | 2.37155500  |
| C  | 3.76798500  | -1.73889200 | -0.41086900 |
| H  | 3.22106900  | -1.51456000 | -1.32890400 |
| H  | 4.83934900  | -1.72228400 | -0.62118000 |
| H  | 3.48408000  | -2.72655400 | -0.03096000 |
| C  | 2.37936400  | 1.85517700  | 0.11557700  |
| C  | 2.89679800  | 1.64525300  | -1.16789900 |
| C  | 2.51610800  | 3.11056300  | 0.71867200  |
| C  | 3.54225900  | 2.67898700  | -1.83495100 |
| H  | 2.75708500  | 0.68230800  | -1.65136800 |
| C  | 3.17022100  | 4.14066000  | 0.04913500  |
| H  | 2.13431600  | 3.26338500  | 1.72363000  |

|   |             |             |             |
|---|-------------|-------------|-------------|
| C | 3.68492300  | 3.92638200  | -1.22774100 |
| H | 3.92554000  | 2.51453100  | -2.83696000 |
| H | 3.28035200  | 5.10867100  | 0.52641100  |
| H | 4.18831300  | 4.73172100  | -1.75272700 |
| C | -4.69047700 | 0.00473900  | 2.96546400  |
| O | -5.62879300 | -0.67270500 | 2.57939300  |
| O | -3.43280400 | -0.23071000 | 2.65571900  |
| H | -3.29238700 | -0.92544300 | 1.84776600  |
| C | -4.86616800 | 1.25529700  | 3.83011600  |
| C | -4.37843800 | 2.45427200  | 3.00190300  |
| H | -4.50715400 | 3.37917000  | 3.57411300  |
| H | -3.32125700 | 2.34231400  | 2.74645800  |
| H | -4.95033900 | 2.54237600  | 2.07145800  |
| C | -6.34075200 | 1.42888400  | 4.18472200  |
| H | -6.71938200 | 0.55419000  | 4.71971000  |
| H | -6.47092500 | 2.31289600  | 4.81743400  |
| H | -6.94316700 | 1.55444900  | 3.28069900  |
| C | -4.01719900 | 1.12052100  | 5.10025500  |
| H | -4.11016400 | 2.02669300  | 5.70797200  |
| H | -4.34691100 | 0.27015200  | 5.70567400  |
| H | -2.96379900 | 0.97537700  | 4.84880500  |
| C | 9.43035100  | 1.82509300  | -0.73208000 |
| H | 9.17828000  | 2.25540600  | -1.70513100 |
| H | 9.83197100  | 2.63216000  | -0.11192300 |
| H | 10.21824100 | 1.08383000  | -0.87607000 |

Variable frequencies

|           |          |          |
|-----------|----------|----------|
| -697.2700 | 11.7503  | 15.1448  |
| 20.2047   | 23.1894  | 25.5231  |
| 27.3659   | 31.1147  | 33.9275  |
| 34.6026   | 41.2256  | 42.6492  |
| 47.6685   | 48.0491  | 51.5191  |
| 55.6801   | 61.7728  | 66.9713  |
| 72.0805   | 73.9836  | 78.7678  |
| 83.9261   | 87.6703  | 94.5810  |
| 102.0867  | 103.7626 | 117.3321 |
| 119.3807  | 129.1616 | 130.5772 |
| 135.5288  | 146.0169 | 151.2276 |
| 154.7352  | 163.1834 | 180.5367 |
| 185.6163  | 190.8430 | 200.5800 |
| 205.6767  | 208.5102 | 219.7917 |
| 226.9943  | 235.6766 | 242.0873 |
| 250.7482  | 263.6837 | 263.9615 |
| 269.5605  | 273.6302 | 275.5952 |

|           |           |           |
|-----------|-----------|-----------|
| 282.3700  | 288.0418  | 295.5848  |
| 303.8655  | 304.4830  | 310.9254  |
| 319.1500  | 323.5037  | 329.7752  |
| 338.4523  | 345.4626  | 354.7656  |
| 360.6128  | 364.0730  | 375.9597  |
| 380.4755  | 386.3347  | 387.4956  |
| 401.2273  | 415.3553  | 419.6101  |
| 421.2225  | 426.8576  | 440.4067  |
| 445.5295  | 448.1517  | 448.5134  |
| 465.2541  | 477.9903  | 484.3668  |
| 492.7567  | 498.8963  | 507.1423  |
| 513.3307  | 520.3320  | 525.2148  |
| 531.7602  | 542.6812  | 552.8699  |
| 561.1404  | 566.2983  | 577.3085  |
| 582.3064  | 587.9065  | 590.8193  |
| 600.3478  | 608.4767  | 618.0972  |
| 627.7735  | 630.6753  | 634.4944  |
| 642.3725  | 643.6216  | 644.5592  |
| 667.6429  | 674.2296  | 692.3747  |
| 708.7613  | 712.2473  | 715.4861  |
| 718.8368  | 722.0897  | 725.6968  |
| 726.7088  | 737.6094  | 755.2606  |
| 767.8087  | 775.3127  | 779.1426  |
| 785.0077  | 791.9821  | 795.7635  |
| 797.7117  | 809.2915  | 817.7722  |
| 830.0482  | 838.9782  | 840.5032  |
| 842.1318  | 855.3007  | 862.5394  |
| 871.8702  | 872.6701  | 875.0086  |
| 876.1625  | 878.8393  | 892.5719  |
| 894.9410  | 901.9965  | 904.7385  |
| 910.7592  | 939.3066  | 946.9607  |
| 952.2090  | 955.1349  | 958.3959  |
| 961.7874  | 968.8709  | 971.9359  |
| 976.3727  | 981.7194  | 991.2198  |
| 1001.8433 | 1004.4088 | 1004.9547 |
| 1008.5119 | 1011.5322 | 1014.3216 |
| 1016.0578 | 1016.1777 | 1016.6169 |
| 1022.0615 | 1025.2485 | 1027.0752 |
| 1031.3716 | 1034.1443 | 1043.4381 |
| 1050.5050 | 1053.3473 | 1054.9361 |
| 1055.0611 | 1057.8593 | 1064.6664 |
| 1068.8254 | 1070.6873 | 1072.6185 |
| 1074.7316 | 1083.5752 | 1104.4756 |
| 1106.7068 | 1118.8945 | 1120.3517 |

|           |           |           |
|-----------|-----------|-----------|
| 1122.2763 | 1124.2991 | 1138.3368 |
| 1141.3480 | 1146.3099 | 1148.3770 |
| 1151.9671 | 1172.8683 | 1176.7066 |
| 1179.1080 | 1183.0331 | 1184.4887 |
| 1185.1949 | 1186.5418 | 1188.7181 |
| 1200.9473 | 1205.0084 | 1209.5074 |
| 1211.8950 | 1216.0440 | 1223.6600 |
| 1235.1803 | 1240.2670 | 1249.2229 |
| 1253.9513 | 1254.0242 | 1256.6611 |
| 1256.9936 | 1269.2343 | 1277.6185 |
| 1278.4864 | 1290.6415 | 1295.2958 |
| 1310.0481 | 1313.0918 | 1320.0608 |
| 1321.4991 | 1325.2182 | 1327.8872 |
| 1332.2954 | 1336.5726 | 1341.5433 |
| 1350.6581 | 1351.8090 | 1359.3797 |
| 1360.2696 | 1363.2446 | 1371.2113 |
| 1373.4533 | 1374.7628 | 1376.9404 |
| 1380.5926 | 1382.2187 | 1394.2180 |
| 1398.7393 | 1401.0999 | 1419.8109 |
| 1420.3571 | 1422.2250 | 1436.6594 |
| 1454.4799 | 1457.0171 | 1461.2943 |
| 1472.2293 | 1482.3792 | 1484.3070 |
| 1486.4170 | 1494.0071 | 1495.3882 |
| 1498.6065 | 1499.6639 | 1501.7510 |
| 1503.0668 | 1504.7320 | 1505.4564 |
| 1506.3851 | 1509.4547 | 1513.6038 |
| 1516.6883 | 1518.7319 | 1529.6797 |
| 1534.3985 | 1535.7583 | 1539.3983 |
| 1548.3849 | 1553.9202 | 1556.3918 |
| 1561.1204 | 1578.1167 | 1661.4848 |
| 1661.6128 | 1668.0513 | 1669.0546 |
| 1683.2270 | 1685.8603 | 1687.4927 |
| 1691.1645 | 1692.6792 | 1696.9635 |
| 1699.6726 | 1701.1840 | 1733.2671 |
| 1777.2296 | 2051.7270 | 3051.1781 |
| 3058.0680 | 3062.8758 | 3066.7919 |
| 3072.0740 | 3073.3380 | 3086.2736 |
| 3129.1956 | 3131.4292 | 3136.2299 |
| 3140.7394 | 3142.4754 | 3143.3415 |
| 3146.2163 | 3154.1218 | 3156.7083 |
| 3163.2274 | 3176.4860 | 3178.4636 |
| 3183.5609 | 3186.7681 | 3191.2548 |
| 3195.8166 | 3196.6766 | 3203.1119 |
| 3208.3075 | 3209.1985 | 3210.5471 |

|           |           |           |
|-----------|-----------|-----------|
| 3211.6410 | 3215.8321 | 3215.9147 |
| 3221.6486 | 3222.7647 | 3224.2089 |
| 3225.4488 | 3225.9394 | 3226.2895 |
| 3226.7216 | 3230.7423 | 3231.0553 |
| 3232.2690 | 3237.3330 | 3239.6118 |
| 3245.7822 | 3248.0479 | 3248.4826 |
| 3253.7899 | 3262.1995 | 3270.4965 |

## **<sup>2</sup>R2**

Zero-point correction=0.345326

Thermal correction to Energy=0.366841

Thermal correction to Enthalpy=0.367785

Thermal correction to Gibbs Free Energy=0.293109

Sum of electronic and zero-point Energies=-1392.692544

Sum of electronic and thermal Energies=-1392.671029

Sum of electronic and thermal Enthalpies=-1392.670085

Sum of electronic and thermal Free Energies=-1392.744761

### Cartesian coordinate

|   |             |             |             |
|---|-------------|-------------|-------------|
| S | 0.06899600  | -1.63964300 | -0.51007400 |
| O | 0.08349500  | -3.08879000 | -0.32703200 |
| O | 0.70961200  | -1.03504500 | -1.66655500 |
| N | 0.76384700  | -0.85359300 | 0.85095100  |
| N | 2.10724900  | -0.51001100 | 0.69230100  |
| C | -2.61511400 | -2.00028200 | -0.12405800 |
| H | -2.36951300 | -3.05276000 | -0.02856100 |
| C | -3.92487100 | -1.54290000 | -0.00883600 |
| H | -4.72494500 | -2.25262800 | 0.17959300  |
| C | -1.60599900 | -1.07694400 | -0.36767900 |
| C | -1.87046000 | 0.28670800  | -0.49647000 |
| H | -1.06482700 | 0.99069100  | -0.68546700 |
| C | -4.22462700 | -0.18433600 | -0.13003700 |
| C | -3.18179200 | 0.72007800  | -0.37151900 |
| H | -3.40049900 | 1.78072800  | -0.46095800 |
| C | -5.64344900 | 0.30873500  | -0.02371200 |
| H | -5.69761200 | 1.22040700  | 0.57668300  |
| H | -6.29370700 | -0.44279300 | 0.42809700  |
| H | -6.04198800 | 0.54529000  | -1.01545400 |
| C | 3.03850000  | -1.55700000 | 0.56733400  |
| H | 2.74064300  | -2.49078100 | 1.02725500  |
| C | 2.37431500  | 0.72911200  | 0.06059400  |
| C | 3.57644100  | 0.89136000  | -0.58831500 |
| H | 3.77599100  | 1.86689500  | -1.02005200 |



|   |             |             |             |
|---|-------------|-------------|-------------|
| C | 4.22242900  | -1.37324400 | -0.07040500 |
| H | 4.91805200  | -2.20391800 | -0.11291800 |
| C | 4.53498600  | -0.12772100 | -0.66781800 |
| H | 5.47737700  | 0.02989600  | -1.17468600 |
| C | 0.44017700  | -1.47608100 | 2.13276700  |
| H | 0.79935800  | -0.81466100 | 2.92209500  |
| H | -0.64646400 | -1.56022500 | 2.20592300  |
| H | 0.87968600  | -2.47226500 | 2.25272100  |
| C | 1.35804000  | 1.78488400  | 0.15266100  |
| C | 0.63407700  | 2.01172700  | 1.33347700  |
| C | 1.07793000  | 2.57958900  | -0.96748800 |
| C | -0.34055500 | 2.99849900  | 1.38905500  |
| H | 0.84876100  | 1.40957500  | 2.21067400  |
| C | 0.10341600  | 3.57217900  | -0.90822300 |
| H | 1.59949700  | 2.38205500  | -1.89897400 |
| C | -0.61468300 | 3.78176800  | 0.26677000  |
| H | -0.88915600 | 3.16001500  | 2.31169700  |
| H | -0.10836000 | 4.16909100  | -1.78969900 |
| H | -1.38133000 | 4.54878700  | 0.31056400  |

Variable frequencies

|           |           |           |
|-----------|-----------|-----------|
| 25.1953   | 29.0650   | 38.7133   |
| 62.2502   | 65.5521   | 72.4397   |
| 90.1869   | 101.3316  | 107.2561  |
| 140.7328  | 174.2607  | 186.7797  |
| 193.9908  | 229.2096  | 253.2115  |
| 267.9310  | 283.6621  | 307.1943  |
| 313.0881  | 328.5680  | 350.9527  |
| 376.8329  | 402.2375  | 417.1889  |
| 419.1100  | 439.9711  | 486.0333  |
| 493.8667  | 509.1563  | 536.3824  |
| 557.6261  | 569.2689  | 576.0181  |
| 623.8449  | 629.1659  | 643.0322  |
| 653.5342  | 662.9341  | 691.5953  |
| 703.3783  | 717.3502  | 721.9111  |
| 746.2817  | 758.3574  | 783.1406  |
| 820.1249  | 836.5743  | 841.4874  |
| 872.6628  | 876.9864  | 934.2456  |
| 948.4429  | 953.6573  | 989.9742  |
| 999.4185  | 1003.9137 | 1012.2898 |
| 1013.6368 | 1017.6089 | 1032.6911 |
| 1034.8181 | 1042.5017 | 1067.0244 |
| 1068.6655 | 1086.6533 | 1110.3743 |
| 1113.5192 | 1119.5271 | 1130.7731 |

|           |           |           |
|-----------|-----------|-----------|
| 1143.4409 | 1152.5257 | 1171.2882 |
| 1177.1222 | 1199.8000 | 1211.0672 |
| 1217.0567 | 1254.0374 | 1268.9653 |
| 1273.9546 | 1316.2909 | 1329.3950 |
| 1334.9860 | 1349.3503 | 1354.5738 |
| 1356.0293 | 1369.6875 | 1396.7440 |
| 1423.3015 | 1448.8254 | 1450.9946 |
| 1454.7511 | 1494.7580 | 1497.0460 |
| 1499.6130 | 1504.0088 | 1515.7823 |
| 1540.2645 | 1550.6798 | 1566.8357 |
| 1658.9701 | 1668.8290 | 1680.2098 |
| 1693.0034 | 1694.3893 | 3071.3791 |
| 3075.0294 | 3143.7153 | 3157.7488 |
| 3166.8848 | 3184.8889 | 3198.6330 |
| 3200.7198 | 3208.1789 | 3208.8099 |
| 3214.2222 | 3220.2339 | 3222.4431 |
| 3224.4998 | 3228.8776 | 3231.2735 |
| 3232.1787 | 3249.0865 | 3255.7047 |

## <sup>2</sup>TS4

Zero-point correction=0.343433

Thermal correction to Energy=0.364986

Thermal correction to Enthalpy=0.365930

Thermal correction to Gibbs Free Energy=0.290231

Sum of electronic and zero-point Energies=-1392.678076

Sum of electronic and thermal Energies=-1392.656523

Sum of electronic and thermal Enthalpies=-1392.655579

Sum of electronic and thermal Free Energies=-1392.731278

### Cartesian coordinate

|   |             |             |             |
|---|-------------|-------------|-------------|
| S | -0.04820600 | -1.61767300 | -0.27061100 |
| O | -0.07750000 | -3.05673000 | -0.00395500 |
| O | 0.62457300  | -1.12991100 | -1.46923400 |
| N | 0.58558600  | -0.74952900 | 1.01089700  |
| N | 2.26845200  | -0.43533900 | 0.81449900  |
| C | -2.77264600 | -1.92218600 | -0.17253500 |
| H | -2.56207100 | -2.98488400 | -0.11389400 |
| C | -4.07696200 | -1.43329900 | -0.17167600 |
| H | -4.90948300 | -2.12855800 | -0.11322900 |
| C | -1.72135400 | -1.01843400 | -0.24827400 |
| C | -1.94106700 | 0.35839900  | -0.31127200 |
| H | -1.09891800 | 1.04506200  | -0.34690200 |
| C | -4.33120700 | -0.06248600 | -0.24127000 |

|   |             |             |             |
|---|-------------|-------------|-------------|
| C | -3.24719400 | 0.82378000  | -0.30611000 |
| H | -3.43273700 | 1.89370200  | -0.34811800 |
| C | 3.01986000  | -1.57283800 | 0.69498200  |
| H | 2.84001200  | -2.33408100 | 1.44688900  |
| C | 2.46095500  | 0.58420800  | -0.08588900 |
| C | 3.40983400  | 0.46067900  | -1.09155000 |
| H | 3.57544500  | 1.30366300  | -1.75360500 |
| C | 3.94368300  | -1.73995200 | -0.30918600 |
| H | 4.51429900  | -2.66055300 | -0.35460600 |
| C | 4.15337100  | -0.70640100 | -1.22914800 |
| H | 4.88505700  | -0.80740000 | -2.02169300 |
| C | 0.38279600  | -1.35292400 | 2.31926700  |
| H | 0.87430100  | -0.71152400 | 3.05327900  |
| H | -0.69027000 | -1.37387600 | 2.53735100  |
| H | 0.76773700  | -2.37653500 | 2.39649300  |
| C | 1.60212200  | 1.77388400  | 0.06361700  |
| C | 1.14708500  | 2.17207900  | 1.32674000  |
| C | 1.18123100  | 2.48619900  | -1.06464800 |
| C | 0.29658700  | 3.26141800  | 1.45841700  |
| H | 1.46471300  | 1.61042100  | 2.19988800  |
| C | 0.32935700  | 3.57943300  | -0.93126800 |
| H | 1.48476300  | 2.15247300  | -2.05201000 |
| C | -0.11691900 | 3.96888600  | 0.32902400  |
| H | -0.04874900 | 3.56004400  | 2.44302100  |
| H | 0.00189500  | 4.11642300  | -1.81572600 |
| H | -0.78689300 | 4.81652500  | 0.43208100  |
| C | -5.74258500 | 0.46292400  | -0.26518300 |
| H | -5.83488800 | 1.36998400  | 0.33748400  |
| H | -6.04016000 | 0.71665300  | -1.28777900 |
| H | -6.44926800 | -0.27777800 | 0.11438300  |

Variable frequencies

|           |          |          |
|-----------|----------|----------|
| -651.7624 | 18.9938  | 22.2593  |
| 35.6681   | 58.9717  | 65.6415  |
| 72.4722   | 82.0251  | 83.7194  |
| 117.8436  | 130.1788 | 163.2851 |
| 176.9670  | 183.9507 | 213.2020 |
| 239.9095  | 264.8683 | 268.6531 |
| 300.8155  | 311.5049 | 325.2316 |
| 354.1570  | 381.9524 | 411.7990 |
| 417.8932  | 418.5795 | 440.9791 |
| 486.6035  | 488.5927 | 500.5619 |
| 545.0591  | 558.7314 | 567.1727 |
| 585.7956  | 627.1161 | 637.0306 |

|           |           |           |
|-----------|-----------|-----------|
| 642.4648  | 659.6305  | 695.3932  |
| 715.0877  | 721.1094  | 738.0474  |
| 761.9283  | 767.8648  | 799.6425  |
| 831.2175  | 837.8878  | 870.1075  |
| 874.8040  | 877.2935  | 937.7651  |
| 949.3899  | 959.9268  | 984.8292  |
| 989.4317  | 1001.3901 | 1002.0932 |
| 1014.4002 | 1014.6712 | 1022.1864 |
| 1034.2214 | 1042.9476 | 1065.2938 |
| 1073.4575 | 1088.8170 | 1108.6682 |
| 1116.8145 | 1118.4528 | 1135.7567 |
| 1139.5486 | 1147.5479 | 1165.4426 |
| 1173.0164 | 1177.6058 | 1185.0097 |
| 1206.6447 | 1208.0952 | 1252.6924 |
| 1279.6011 | 1299.1779 | 1326.5087 |
| 1335.3440 | 1343.6521 | 1345.6651 |
| 1358.8174 | 1361.6768 | 1423.5120 |
| 1435.4577 | 1452.9255 | 1453.3221 |
| 1482.3425 | 1498.6725 | 1501.1668 |
| 1503.0648 | 1505.0363 | 1513.0152 |
| 1549.6469 | 1553.9167 | 1594.0220 |
| 1655.1057 | 1669.4228 | 1672.3132 |
| 1693.0950 | 1697.6063 | 3050.6244 |
| 3072.9243 | 3123.3940 | 3142.7899 |
| 3162.6928 | 3169.6282 | 3196.1170 |
| 3200.2746 | 3203.2645 | 3209.5922 |
| 3213.6626 | 3215.0825 | 3218.6056 |
| 3224.8818 | 3225.9499 | 3229.7786 |
| 3231.3187 | 3238.5385 | 3249.4785 |

## Pyd

Zero-point correction=0.171616

Thermal correction to Energy=0.180303

Thermal correction to Enthalpy=0.181247

Thermal correction to Gibbs Free Energy=0.137066

Sum of electronic and zero-point Energies=-478.978417

Sum of electronic and thermal Energies=-478.969730

Sum of electronic and thermal Enthalpies=-478.968786

Sum of electronic and thermal Free Energies=-479.012968

Cartesian coordinate

|   |            |             |             |
|---|------------|-------------|-------------|
| N | 1.36333200 | -1.14935800 | -0.25238800 |
| C | 2.69447500 | -1.18972800 | -0.26038500 |

|   |             |             |             |
|---|-------------|-------------|-------------|
| H | 3.14015500  | -2.16048000 | -0.46716700 |
| C | 0.76338100  | 0.02351800  | -0.00207600 |
| C | 1.49590600  | 1.18619500  | 0.26793800  |
| H | 0.98656400  | 2.11147900  | 0.51148200  |
| C | 3.50470600  | -0.08260600 | -0.02545500 |
| H | 4.58434400  | -0.17599900 | -0.04940500 |
| C | 2.88315500  | 1.13005500  | 0.25071000  |
| H | 3.46932800  | 2.01910600  | 0.46093800  |
| C | -0.72458800 | 0.02214200  | -0.00535200 |
| C | -1.41408100 | -1.17170800 | 0.23262100  |
| C | -1.45761200 | 1.18832800  | -0.24809300 |
| C | -2.80362100 | -1.19406800 | 0.24484400  |
| H | -0.84082100 | -2.07550200 | 0.40711200  |
| C | -2.84873500 | 1.16431500  | -0.23963800 |
| H | -0.94326800 | 2.11756300  | -0.47304100 |
| C | -3.52632200 | -0.02580800 | 0.01126700  |
| H | -3.32498400 | -2.12624000 | 0.43824300  |
| H | -3.40320600 | 2.07583200  | -0.43867600 |
| H | -4.61142300 | -0.04407200 | 0.01894500  |

#### Variable frequencies

|           |           |           |
|-----------|-----------|-----------|
| 55.3954   | 97.7107   | 152.2187  |
| 254.3991  | 330.6363  | 397.1953  |
| 417.5807  | 419.9412  | 482.8059  |
| 567.2655  | 620.7928  | 632.6677  |
| 649.8538  | 715.4530  | 764.3670  |
| 773.1995  | 777.2685  | 829.5707  |
| 877.4674  | 921.1929  | 956.4216  |
| 1000.5241 | 1003.8063 | 1014.2327 |
| 1020.7493 | 1025.7219 | 1029.8435 |
| 1058.1949 | 1083.2166 | 1102.7896 |
| 1124.0947 | 1134.6121 | 1178.2690 |
| 1183.6279 | 1214.7370 | 1304.5668 |
| 1317.8893 | 1341.8974 | 1354.4744 |
| 1367.7303 | 1477.2105 | 1507.4395 |
| 1530.8374 | 1565.2573 | 1661.1741 |
| 1683.1164 | 1689.7305 | 1703.2953 |
| 3193.5111 | 3198.1916 | 3205.1156 |
| 3213.5114 | 3216.9477 | 3223.7350 |
| 3232.6686 | 3234.5246 | 3240.1810 |

#### <sup>2</sup>M4

Zero-point correction=0.428418

Thermal correction to Energy=0.454158  
 Thermal correction to Enthalpy=0.455102  
 Thermal correction to Gibbs Free Energy=0.369056  
 Sum of electronic and zero-point Energies=-1815.381817  
 Sum of electronic and thermal Energies=-1815.356078  
 Sum of electronic and thermal Enthalpies=-1815.355133  
 Sum of electronic and thermal Free Energies=-1815.441179

Cartesian coordinate

|   |             |             |             |
|---|-------------|-------------|-------------|
| C | -1.68554900 | 2.13742800  | -0.94048900 |
| C | -1.00298100 | 1.08241600  | -0.45817200 |
| C | 0.28768900  | 0.69095000  | -1.02541300 |
| O | 0.90982500  | 1.39384600  | -1.87088000 |
| H | -1.22603900 | 2.69330500  | -1.75578100 |
| C | -2.99185000 | 2.60164000  | -0.46839900 |
| C | -3.45992000 | 3.86019200  | -0.87161400 |
| C | -3.81641600 | 1.82094400  | 0.35861600  |
| C | -4.69601900 | 4.33542500  | -0.44744400 |
| H | -2.83810800 | 4.46931100  | -1.52218100 |
| C | -5.05039800 | 2.29540000  | 0.78257000  |
| H | -3.49836700 | 0.82413800  | 0.65195200  |
| C | -5.49543900 | 3.55636800  | 0.38515700  |
| H | -5.03681700 | 5.31428800  | -0.76976800 |
| H | -5.67482000 | 1.67466300  | 1.41760600  |
| H | -6.46185400 | 3.92296300  | 0.71560400  |
| H | -1.38746200 | 0.51034100  | 0.38130500  |
| C | 4.63899000  | 0.90404100  | 0.85118800  |
| C | 3.53582300  | 1.19209600  | 0.04332700  |
| C | 2.80958100  | 2.36716700  | 0.23238800  |
| C | 3.19175800  | 3.22992700  | 1.25830700  |
| C | 4.28550800  | 2.93484000  | 2.07286500  |
| C | 5.02159200  | 1.77116000  | 1.86841500  |
| C | 5.29447900  | -0.39112100 | 0.45933500  |
| C | 4.68518100  | -0.68387300 | -0.92794700 |
| C | 3.34183600  | 0.10790300  | -1.00495500 |
| H | 1.97706400  | 2.60543400  | -0.41951700 |
| H | 2.63618000  | 4.14845800  | 1.41781200  |
| H | 4.57157900  | 3.62244700  | 2.86269600  |
| H | 5.88501100  | 1.54551500  | 2.48759200  |
| H | 5.05683800  | -1.17624500 | 1.18534900  |
| H | 5.34022300  | -0.26958300 | -1.69710200 |
| H | 6.38408400  | -0.32468200 | 0.40909400  |
| H | 3.13680800  | 0.51438800  | -1.99444400 |
| N | 2.23709100  | -0.82014000 | -0.69005500 |

|    |             |             |             |
|----|-------------|-------------|-------------|
| O  | 4.56198200  | -2.05419200 | -1.25328100 |
| C  | 0.89681900  | -0.52651300 | -0.57109900 |
| C  | 2.40939000  | -2.10232300 | -0.25203900 |
| N  | 0.35443200  | -1.66542900 | -0.03156000 |
| N  | 1.30678600  | -2.64427300 | 0.15775500  |
| C  | 3.74116100  | -2.77901000 | -0.36764300 |
| H  | 4.19995600  | -2.90505300 | 0.62020100  |
| H  | 3.59737400  | -3.77061400 | -0.80006900 |
| C  | -1.00957200 | -2.03707800 | 0.10054100  |
| C  | -1.40899800 | -2.69077500 | 1.26320700  |
| C  | -1.91884800 | -1.78407200 | -0.92655300 |
| C  | -2.73454700 | -3.08031600 | 1.41330000  |
| C  | -3.24710100 | -2.15846400 | -0.77196300 |
| C  | -3.64290800 | -2.80106100 | 0.39816000  |
| H  | -3.06323200 | -3.58724000 | 2.31316100  |
| H  | -3.96928600 | -1.96392500 | -1.55639000 |
| H  | -1.59071100 | -1.28964200 | -1.83434000 |
| H  | -0.67945500 | -2.88901200 | 2.04034000  |
| Cl | -5.31159600 | -3.27043000 | 0.59207700  |

#### Variable frequencies

|          |          |          |
|----------|----------|----------|
| 14.7689  | 18.9252  | 25.6271  |
| 39.3537  | 43.0760  | 51.4413  |
| 60.4459  | 71.9658  | 91.9293  |
| 116.9891 | 132.3672 | 150.7559 |
| 175.1881 | 185.8431 | 204.4395 |
| 218.8535 | 226.4439 | 255.4715 |
| 260.5994 | 269.4046 | 290.0460 |
| 298.5226 | 334.5299 | 356.5729 |
| 357.4811 | 382.3202 | 410.0971 |
| 415.9311 | 424.1503 | 427.0368 |
| 453.6797 | 463.8988 | 478.5900 |
| 496.3378 | 501.7010 | 519.1102 |
| 534.6202 | 550.4934 | 576.5679 |
| 587.8541 | 604.4022 | 609.2784 |
| 632.4584 | 635.9283 | 648.8329 |
| 649.0853 | 676.7807 | 691.0340 |
| 713.1028 | 727.8509 | 730.4313 |
| 758.3990 | 772.8716 | 778.7104 |
| 787.0681 | 821.2466 | 844.6481 |
| 847.5852 | 852.2836 | 859.2270 |
| 870.0496 | 882.0993 | 891.1854 |
| 899.5511 | 908.0602 | 921.3210 |
| 946.2515 | 977.5076 | 987.0544 |

|           |           |           |
|-----------|-----------|-----------|
| 992.0817  | 998.2099  | 1008.5430 |
| 1012.4216 | 1014.9436 | 1018.2067 |
| 1024.3394 | 1033.9158 | 1037.3684 |
| 1044.6871 | 1056.0784 | 1073.4677 |
| 1075.3682 | 1095.2182 | 1122.8435 |
| 1123.9130 | 1131.0439 | 1135.2389 |
| 1140.0609 | 1157.3162 | 1174.9278 |
| 1183.4570 | 1187.7248 | 1196.9958 |
| 1200.0947 | 1204.0484 | 1213.6381 |
| 1233.6280 | 1238.6485 | 1242.6063 |
| 1258.8433 | 1284.9827 | 1302.1169 |
| 1312.2473 | 1320.7762 | 1327.5713 |
| 1333.6326 | 1341.2911 | 1342.7118 |
| 1346.3491 | 1353.5521 | 1364.3127 |
| 1371.1254 | 1375.8031 | 1386.9374 |
| 1421.1865 | 1445.8328 | 1470.0947 |
| 1490.5003 | 1491.9419 | 1499.2190 |
| 1505.3115 | 1519.9250 | 1524.1704 |
| 1538.2659 | 1555.3517 | 1559.2403 |
| 1627.0009 | 1664.1188 | 1674.3467 |
| 1680.1303 | 1685.3650 | 1694.4974 |
| 1697.8657 | 1702.5747 | 1703.9408 |
| 3080.0586 | 3095.6234 | 3132.3063 |
| 3144.6954 | 3171.0494 | 3183.4737 |
| 3193.0515 | 3196.6399 | 3197.3172 |
| 3204.0138 | 3205.6373 | 3210.9777 |
| 3218.7011 | 3220.1621 | 3225.7582 |
| 3229.3691 | 3232.6245 | 3238.4417 |
| 3241.0217 | 3244.7118 | 3246.1752 |

## **<sup>2</sup>TS5R**

Zero-point correction=0.778664

Thermal correction to Energy=0.826393

Thermal correction to Enthalpy=0.827337

Thermal correction to Gibbs Free Energy=0.691980

Sum of electronic and zero-point Energies=-3207.941420

Sum of electronic and thermal Energies=-3207.893691

Sum of electronic and thermal Enthalpies=-3207.892747

Sum of electronic and thermal Free Energies=-3208.028104

Cartesian coordinate

|   |            |             |             |
|---|------------|-------------|-------------|
| N | 0.16065300 | -2.88888900 | -0.81176900 |
| N | 1.21617800 | -3.05730400 | 0.07608200  |



|   |             |             |             |
|---|-------------|-------------|-------------|
| C | 1.42868400  | -4.42779300 | 0.55740800  |
| C | -1.10630900 | -3.34290200 | -0.47959400 |
| C | -2.17017700 | -3.08469700 | -1.26439800 |
| C | -2.04541700 | -2.16621500 | -2.38315700 |
| C | -0.68278500 | -1.87663300 | -2.77742500 |
| C | 0.38412800  | -2.18753900 | -1.99227700 |
| C | -2.90488900 | -0.51833100 | -1.86464000 |
| C | -2.22316500 | 0.03281600  | -0.75434600 |
| C | -1.16341500 | 0.93655500  | -0.93102900 |
| O | -0.60073100 | 1.23436000  | -2.00408300 |
| S | 1.22476500  | -1.85308200 | 1.30070400  |
| O | 0.91961100  | -0.61463500 | 0.59075500  |
| C | 2.92633300  | -1.89855200 | 1.75584000  |
| O | 0.39524600  | -2.25537100 | 2.42927200  |
| C | 3.27616200  | -2.19177400 | 3.06720300  |
| C | 4.62770200  | -2.20944400 | 3.40180500  |
| C | 5.61116000  | -1.94594400 | 2.44590300  |
| C | 5.21929700  | -1.65858700 | 1.12925300  |
| C | 3.88070000  | -1.63051800 | 0.77258700  |
| H | 1.42925700  | -5.08539100 | -0.31254900 |
| H | 2.41060700  | -4.46713600 | 1.03229200  |
| H | 0.67107300  | -4.75612900 | 1.27587400  |
| H | -3.13564200 | -3.50298600 | -1.00560500 |
| H | -2.74876100 | -2.31817200 | -3.20058900 |
| H | -0.48901000 | -1.37609700 | -3.71902900 |
| H | -2.69644400 | 0.00891600  | -2.79707200 |
| H | 2.50568600  | -2.40137400 | 3.80170700  |
| H | 4.92093700  | -2.43575300 | 4.42203900  |
| H | 5.97674100  | -1.46124300 | 0.37557500  |
| H | 3.57328300  | -1.41535300 | -0.24810900 |
| C | -4.33212000 | -0.92462900 | -1.70987900 |
| C | -4.89636000 | -1.25237900 | -0.47054300 |
| C | -5.14184500 | -0.98946000 | -2.84992500 |
| C | -6.23439700 | -1.62250400 | -0.37654300 |
| H | -4.29921500 | -1.21417300 | 0.43638300  |
| C | -6.47930800 | -1.35979000 | -2.75706300 |
| H | -4.71797900 | -0.73210600 | -3.81812700 |
| C | -7.03107600 | -1.67683400 | -1.51844700 |
| H | -6.65648500 | -1.86308100 | 0.59408200  |
| H | -7.09171700 | -1.39404500 | -3.65212400 |
| H | -8.07505900 | -1.96168900 | -1.44238400 |
| H | -2.50249200 | -0.24396800 | 0.25441000  |
| C | 3.26601600  | 3.79337300  | -0.97687500 |
| C | 1.97684200  | 3.30209400  | -1.16921600 |

|    |             |             |             |
|----|-------------|-------------|-------------|
| C  | 1.07813800  | 3.93114500  | -2.02622900 |
| C  | 1.49333000  | 5.08345100  | -2.68705800 |
| C  | 2.78389600  | 5.58448600  | -2.49707400 |
| C  | 3.67964700  | 4.94234000  | -1.64625300 |
| C  | 4.05090200  | 2.92780000  | -0.02531800 |
| C  | 3.03306500  | 1.91311400  | 0.54637300  |
| C  | 1.74889000  | 2.04994400  | -0.35506000 |
| H  | 0.08748700  | 3.51529300  | -2.17952400 |
| H  | 0.81216900  | 5.59453100  | -3.35926200 |
| H  | 3.09128500  | 6.48399500  | -3.02059200 |
| H  | 4.68168700  | 5.33522500  | -1.50332800 |
| H  | 4.51466200  | 3.49091500  | 0.79098200  |
| H  | 3.39993900  | 0.88907300  | 0.48363200  |
| H  | 4.85667200  | 2.40173500  | -0.54787000 |
| H  | 1.61802300  | 1.15896700  | -0.96685000 |
| N  | 0.54776500  | 2.15265600  | 0.48205400  |
| O  | 2.79414300  | 2.10784800  | 1.93121700  |
| C  | -0.68870200 | 1.67115900  | 0.29788000  |
| C  | 0.57998700  | 2.73337900  | 1.71591500  |
| N  | -1.36590700 | 2.01485000  | 1.40087900  |
| N  | -0.57865700 | 2.66033600  | 2.30542000  |
| C  | 1.91135000  | 3.17258200  | 2.22666100  |
| H  | 2.22365800  | 4.11388000  | 1.75395200  |
| H  | 1.87845000  | 3.30256700  | 3.30784000  |
| C  | -2.74261300 | 1.76541200  | 1.71992500  |
| C  | -3.74235700 | 2.20044100  | 0.85651100  |
| C  | -3.02708400 | 1.05398500  | 2.87841900  |
| C  | -5.06381400 | 1.88606000  | 1.14513600  |
| C  | -4.35231800 | 0.75390600  | 3.17544200  |
| C  | -5.35444900 | 1.16262300  | 2.30010300  |
| H  | -5.86290200 | 2.19555800  | 0.48197500  |
| H  | -4.60517600 | 0.19780800  | 4.07039800  |
| H  | -2.22053900 | 0.73135800  | 3.52766600  |
| H  | -3.49106700 | 2.76070000  | -0.03738800 |
| Cl | -7.00592200 | 0.75507600  | 2.64998900  |
| H  | -1.15950600 | -3.94407400 | 0.41953100  |
| C  | 1.77572600  | -1.84864600 | -2.37269900 |
| C  | 2.79438200  | -2.80833600 | -2.37782400 |
| C  | 2.06261700  | -0.53864100 | -2.76658600 |
| C  | 4.08698000  | -2.45322800 | -2.74550000 |
| H  | 2.57283500  | -3.83421000 | -2.10085700 |
| C  | 3.36491400  | -0.18004300 | -3.11153100 |
| H  | 1.25877200  | 0.19366200  | -2.78756100 |
| C  | 4.37905300  | -1.13430900 | -3.09628300 |

|   |            |             |             |
|---|------------|-------------|-------------|
| H | 4.86909000 | -3.20529700 | -2.75594400 |
| H | 3.57948800 | 0.84475000  | -3.39960800 |
| H | 5.39166000 | -0.85817700 | -3.37200300 |
| C | 7.07126000 | -1.96608200 | 2.80815400  |
| H | 7.61953500 | -2.66461500 | 2.17003500  |
| H | 7.51564600 | -0.97674100 | 2.66637200  |
| H | 7.22002900 | -2.26038000 | 3.84811400  |

Variable frequencies

|           |          |          |
|-----------|----------|----------|
| -250.6379 | 11.2310  | 15.3080  |
| 16.9308   | 20.8077  | 24.6332  |
| 27.9683   | 33.0296  | 37.0383  |
| 40.4422   | 45.5013  | 49.4374  |
| 57.3830   | 59.8282  | 64.9450  |
| 70.1664   | 73.9618  | 78.8108  |
| 82.8093   | 86.5703  | 95.6228  |
| 107.6475  | 114.9635 | 119.5292 |
| 136.3088  | 139.7770 | 146.3601 |
| 153.5604  | 169.3436 | 178.9685 |
| 184.7843  | 198.2233 | 199.0363 |
| 213.0339  | 220.1155 | 223.1746 |
| 232.4133  | 247.2286 | 256.1250 |
| 263.6447  | 271.9691 | 276.0684 |
| 289.1996  | 307.3347 | 310.8436 |
| 315.3852  | 331.5285 | 345.1417 |
| 356.5636  | 358.4385 | 364.7210 |
| 371.8740  | 388.8088 | 404.1412 |
| 412.3669  | 417.5191 | 418.4428 |
| 421.6785  | 423.9160 | 426.2728 |
| 441.9723  | 448.3664 | 453.6439 |
| 477.5866  | 486.2986 | 488.4664 |
| 498.1780  | 500.1669 | 518.0422 |
| 526.8618  | 529.3399 | 533.9653 |
| 554.9871  | 566.4765 | 574.9392 |
| 583.4168  | 593.6550 | 598.3803 |
| 601.2658  | 604.9560 | 623.9306 |
| 625.5107  | 631.3035 | 633.7363 |
| 641.2107  | 649.7799 | 664.1891 |
| 672.5246  | 683.0942 | 710.5050 |
| 712.8765  | 719.8402 | 720.8872 |
| 722.3842  | 725.4407 | 730.6007 |
| 732.3198  | 755.6291 | 762.7827 |
| 769.0444  | 774.6567 | 780.2519 |
| 785.0375  | 793.2673 | 798.5863 |

|           |           |           |
|-----------|-----------|-----------|
| 820.7399  | 824.8523  | 828.6671  |
| 837.1933  | 844.6025  | 849.8141  |
| 854.8469  | 866.5798  | 871.4978  |
| 874.7139  | 877.4304  | 878.1183  |
| 881.0322  | 886.1063  | 897.2040  |
| 911.2235  | 921.3542  | 948.3550  |
| 952.2166  | 959.3530  | 972.3646  |
| 974.1303  | 984.3917  | 995.2618  |
| 996.1678  | 1002.3184 | 1004.5412 |
| 1010.5671 | 1013.4371 | 1013.7596 |
| 1015.9139 | 1016.5861 | 1025.1770 |
| 1027.9615 | 1028.3111 | 1033.2489 |
| 1034.9918 | 1039.4236 | 1043.7659 |
| 1059.1905 | 1061.4327 | 1063.2853 |
| 1068.2914 | 1068.6575 | 1071.9766 |
| 1078.4329 | 1083.2291 | 1100.7617 |
| 1115.9666 | 1119.1307 | 1121.1464 |
| 1121.9881 | 1122.9128 | 1131.7901 |
| 1140.1241 | 1146.3456 | 1147.7584 |
| 1151.4551 | 1158.3997 | 1162.6711 |
| 1171.9670 | 1177.7568 | 1179.3330 |
| 1180.8910 | 1181.8410 | 1187.4648 |
| 1198.1051 | 1200.3858 | 1206.1209 |
| 1209.6278 | 1213.2710 | 1214.2876 |
| 1216.5787 | 1232.8380 | 1238.7212 |
| 1250.4670 | 1252.5999 | 1271.3898 |
| 1277.6403 | 1282.6018 | 1290.9775 |
| 1297.5283 | 1307.6774 | 1310.5883 |
| 1319.2923 | 1323.3656 | 1324.8776 |
| 1331.9947 | 1333.1646 | 1339.6952 |
| 1342.1974 | 1344.8262 | 1349.9500 |
| 1358.5439 | 1360.3444 | 1362.7943 |
| 1368.6961 | 1370.2615 | 1373.4059 |
| 1381.8146 | 1383.1481 | 1418.4633 |
| 1426.1462 | 1451.9325 | 1454.5125 |
| 1456.0538 | 1462.5473 | 1473.9984 |
| 1489.1978 | 1489.7738 | 1494.9811 |
| 1498.9896 | 1501.4761 | 1503.3559 |
| 1506.2087 | 1506.5255 | 1517.4921 |
| 1527.9509 | 1534.9423 | 1538.8055 |
| 1542.0573 | 1546.9739 | 1549.8075 |
| 1550.3727 | 1577.7383 | 1584.9945 |
| 1624.6164 | 1643.1718 | 1666.2921 |
| 1668.5374 | 1673.8045 | 1679.5635 |

|           |           |           |
|-----------|-----------|-----------|
| 1683.0346 | 1683.4699 | 1686.7726 |
| 1693.0908 | 1694.4882 | 1695.7973 |
| 1701.7691 | 1720.7783 | 3077.1399 |
| 3077.2113 | 3080.3347 | 3090.5945 |
| 3132.9028 | 3149.2111 | 3151.1554 |
| 3162.0764 | 3166.5946 | 3170.8801 |
| 3170.9258 | 3182.7283 | 3189.4089 |
| 3192.8350 | 3195.2325 | 3202.9400 |
| 3203.3847 | 3207.9584 | 3208.1541 |
| 3210.5407 | 3217.1699 | 3217.7384 |
| 3218.8874 | 3221.6508 | 3223.0353 |
| 3224.3303 | 3227.1380 | 3228.7924 |
| 3232.4423 | 3234.1493 | 3234.9371 |
| 3237.1599 | 3237.3622 | 3238.2913 |
| 3241.0849 | 3242.5758 | 3249.2347 |
| 3253.3163 | 3255.8924 | 3274.7930 |

## **<sup>2</sup>TS5R<sup>b</sup>**

Zero-point correction=0.778512

Thermal correction to Energy=0.825968

Thermal correction to Enthalpy=0.826913

Thermal correction to Gibbs Free Energy=0.694871

Sum of electronic and zero-point Energies=-3207.928667

Sum of electronic and thermal Energies=-3207.881211

Sum of electronic and thermal Enthalpies=-3207.880267

Sum of electronic and thermal Free Energies=-3208.012309

### Cartesian coordinate

|   |             |             |             |
|---|-------------|-------------|-------------|
| C | -5.39325700 | -1.99696600 | 1.92128300  |
| C | -5.28476400 | -1.64255600 | 0.57295200  |
| C | -4.63636300 | -2.46349400 | -0.34469700 |
| C | -4.04827000 | -3.63816400 | 0.12083300  |
| C | -4.13418500 | -3.98448500 | 1.47025400  |
| C | -4.81701100 | -3.17589900 | 2.37839100  |
| C | -6.18635600 | -0.96814500 | 2.68971400  |
| C | -6.92636800 | -0.22716900 | 1.55469600  |
| C | -5.97364100 | -0.32185400 | 0.33820200  |
| H | -4.58653400 | -2.19254100 | -1.39563500 |
| H | -3.51831600 | -4.28637800 | -0.56923200 |
| H | -3.67362400 | -4.90477900 | 1.81440000  |
| H | -4.90085600 | -3.46665100 | 3.42088100  |
| H | -5.51457700 | -0.29850000 | 3.24101500  |
| H | -7.82659500 | -0.78753200 | 1.29401900  |

|    |             |             |             |
|----|-------------|-------------|-------------|
| H  | -6.88103700 | -1.39948400 | 3.41280900  |
| H  | -6.47691800 | -0.22132000 | -0.62520600 |
| N  | -5.02893700 | 0.82726700  | 0.45081000  |
| O  | -7.36913400 | 1.08595100  | 1.81759500  |
| C  | -3.88986600 | 1.03122800  | -0.22405200 |
| C  | -5.19417000 | 1.90500300  | 1.28403700  |
| N  | -3.41977800 | 2.20002400  | 0.19995800  |
| N  | -4.21768500 | 2.75915100  | 1.14946500  |
| C  | -6.36713300 | 1.99133600  | 2.21382900  |
| H  | -6.03032600 | 1.81215000  | 3.24285300  |
| H  | -6.79608800 | 2.99355400  | 2.16541700  |
| C  | -1.44787700 | -1.39070200 | -1.85239600 |
| C  | -2.16059900 | -0.59244800 | -0.90982400 |
| C  | -3.27934700 | 0.15986400  | -1.30080200 |
| O  | -3.84653800 | 0.18622100  | -2.40763900 |
| H  | -1.81447600 | -0.51883400 | 0.11879500  |
| C  | -2.27268800 | 2.88168800  | -0.32526400 |
| C  | -2.20193100 | 3.08326600  | -1.70162200 |
| C  | -1.26531700 | 3.29882000  | 0.53642400  |
| C  | -1.07933400 | 3.70666000  | -2.23075900 |
| H  | -3.00726800 | 2.74554400  | -2.34660500 |
| C  | -0.14130600 | 3.92153600  | 0.00315400  |
| H  | -1.34798900 | 3.12329400  | 1.60363200  |
| C  | -0.06043200 | 4.11663600  | -1.37340500 |
| H  | -0.99390500 | 3.87484500  | -3.29785700 |
| H  | 0.67700600  | 4.22926000  | 0.64624700  |
| Cl | 1.34807100  | 4.88057900  | -2.04198200 |
| S  | 3.97064300  | -1.68858100 | 0.04285900  |
| O  | 4.30643600  | -2.95510700 | -0.59504800 |
| O  | 2.75418600  | -1.55395800 | 0.82962200  |
| N  | 3.85478500  | -0.44106100 | -1.14190900 |
| N  | 2.57254000  | -0.33647900 | -1.66714400 |
| C  | 6.54488600  | -1.82352900 | 0.94290800  |
| H  | 6.61224100  | -2.73922300 | 0.36458600  |
| C  | 7.62230500  | -1.34548000 | 1.68239300  |
| H  | 8.55615400  | -1.89893100 | 1.68489700  |
| C  | 5.35716000  | -1.10236900 | 0.96383100  |
| C  | 5.21416400  | 0.07552600  | 1.69739500  |
| H  | 4.26862500  | 0.61195100  | 1.70042200  |
| C  | 7.51887700  | -0.16590300 | 2.42364600  |
| C  | 6.30390900  | 0.53430300  | 2.42107200  |
| H  | 6.21434100  | 1.44972500  | 2.99938800  |
| C  | 8.69284900  | 0.36203800  | 3.20317000  |
| H  | 8.37863100  | 0.72525400  | 4.18456600  |

|   |             |             |             |
|---|-------------|-------------|-------------|
| H | 9.15608900  | 1.20146100  | 2.67495600  |
| H | 9.45436500  | -0.40661000 | 3.34524100  |
| C | 2.13604100  | -1.16961000 | -2.67845900 |
| H | 2.88169400  | -1.84708400 | -3.07604800 |
| C | 1.68979200  | 0.55486300  | -1.07233500 |
| C | 0.40909900  | 0.60936200  | -1.50596500 |
| H | -0.24190500 | 1.32912700  | -1.02431300 |
| C | 0.87920600  | -1.09804500 | -3.17083200 |
| H | 0.61512800  | -1.74169100 | -4.00210900 |
| C | -0.13797900 | -0.25930200 | -2.54579700 |
| C | 4.93982500  | -0.41880700 | -2.12712000 |
| H | 5.87966300  | -0.31135700 | -1.58273800 |
| H | 4.98615800  | -1.32445400 | -2.74017300 |
| H | 4.79462900  | 0.45828500  | -2.75914600 |
| C | 2.17873700  | 1.44139200  | 0.01468200  |
| C | 3.16282400  | 2.40559900  | -0.21736500 |
| C | 1.59599500  | 1.34013900  | 1.28023200  |
| C | 3.55145200  | 3.26598300  | 0.80548300  |
| H | 3.61367600  | 2.48842500  | -1.20184200 |
| C | 1.99403300  | 2.19265700  | 2.30706400  |
| H | 0.84652600  | 0.57403200  | 1.45699900  |
| C | 2.97088500  | 3.15908600  | 2.06978100  |
| H | 4.30825400  | 4.02008100  | 0.61664400  |
| H | 1.54841400  | 2.09732600  | 3.29193400  |
| H | 3.28154600  | 3.82566100  | 2.86786800  |
| C | -0.77675800 | -2.63365000 | -1.37436100 |
| C | 0.09849300  | -2.63213500 | -0.28647900 |
| C | -0.99357600 | -3.82632800 | -2.07089500 |
| C | 0.73607600  | -3.80518800 | 0.10449200  |
| H | 0.31959900  | -1.70762400 | 0.24047600  |
| C | -0.37044200 | -5.00470000 | -1.66856800 |
| H | -1.65896600 | -3.82987900 | -2.93097900 |
| C | 0.49647600  | -4.99567700 | -0.57909700 |
| H | 1.43444700  | -3.77658900 | 0.93356600  |
| H | -0.55437300 | -5.92534900 | -2.21320600 |
| H | 0.99497400  | -5.90903400 | -0.27159800 |
| H | -2.02583900 | -1.55402200 | -2.76447300 |
| H | -0.83082300 | 0.24188700  | -3.22593900 |

Variable frequencies

|           |         |         |
|-----------|---------|---------|
| -232.9392 | 14.3372 | 21.8776 |
| 23.3678   | 28.9183 | 32.6072 |
| 36.7811   | 43.1355 | 45.1868 |
| 51.4144   | 52.8108 | 57.4893 |

|           |           |           |
|-----------|-----------|-----------|
| 64.2496   | 68.6342   | 74.6481   |
| 75.4582   | 84.5756   | 90.2816   |
| 91.2254   | 96.3379   | 100.1583  |
| 104.2460  | 110.9278  | 117.3150  |
| 131.2446  | 145.0401  | 149.4943  |
| 154.8340  | 171.2658  | 180.8512  |
| 186.0076  | 189.9419  | 209.6195  |
| 212.7835  | 219.0772  | 230.2425  |
| 239.1504  | 251.5899  | 254.7879  |
| 261.1442  | 271.9129  | 280.8223  |
| 287.3914  | 309.2020  | 311.6389  |
| 314.9592  | 328.3401  | 338.6017  |
| 343.1985  | 351.0690  | 354.0152  |
| 366.3975  | 382.9072  | 385.3191  |
| 405.7395  | 415.9140  | 416.8350  |
| 422.0137  | 425.9280  | 427.4821  |
| 444.5211  | 451.0562  | 460.8445  |
| 468.1492  | 484.3632  | 487.6114  |
| 496.0746  | 497.7158  | 524.7820  |
| 534.7491  | 538.7338  | 539.8968  |
| 555.0197  | 563.2591  | 569.7195  |
| 573.0160  | 583.1767  | 589.3913  |
| 604.4143  | 614.3692  | 620.0646  |
| 628.2113  | 637.8647  | 640.2714  |
| 641.8889  | 644.4217  | 653.1794  |
| 665.5825  | 685.5791  | 691.2714  |
| 708.4556  | 713.9442  | 720.5670  |
| 721.9088  | 723.7241  | 727.5449  |
| 731.5944  | 751.7429  | 760.3911  |
| 768.2109  | 777.6455  | 782.4520  |
| 788.1833  | 795.1831  | 803.9394  |
| 809.3344  | 820.9634  | 828.7454  |
| 835.9685  | 844.2098  | 846.4715  |
| 851.4913  | 854.7991  | 870.6393  |
| 870.8120  | 881.8417  | 885.4244  |
| 886.8073  | 893.1759  | 900.5273  |
| 911.4288  | 917.3672  | 947.7917  |
| 951.0352  | 960.0052  | 971.8326  |
| 984.6882  | 985.5480  | 987.9669  |
| 1006.2011 | 1006.5149 | 1007.4615 |
| 1007.8442 | 1008.6747 | 1016.6944 |
| 1017.2821 | 1021.2970 | 1026.3700 |
| 1027.9522 | 1031.7780 | 1032.1311 |
| 1034.4993 | 1035.2051 | 1044.0901 |



|           |           |           |
|-----------|-----------|-----------|
| 1054.5862 | 1065.0283 | 1066.3025 |
| 1068.8598 | 1071.4694 | 1075.1367 |
| 1085.3348 | 1098.8749 | 1103.1464 |
| 1114.3797 | 1119.1053 | 1122.1158 |
| 1129.3589 | 1134.3120 | 1135.4379 |
| 1139.3224 | 1143.3673 | 1145.8512 |
| 1153.9416 | 1163.1009 | 1169.0332 |
| 1179.7132 | 1180.9355 | 1182.1672 |
| 1183.3219 | 1186.3314 | 1187.7265 |
| 1201.1153 | 1201.9732 | 1205.3360 |
| 1209.1172 | 1209.9753 | 1211.4643 |
| 1218.7100 | 1230.1594 | 1243.5985 |
| 1250.1934 | 1254.9791 | 1255.6103 |
| 1267.1072 | 1279.6831 | 1297.4816 |
| 1305.5644 | 1310.5336 | 1314.1139 |
| 1319.3285 | 1322.2179 | 1325.9097 |
| 1328.5912 | 1338.4609 | 1344.1549 |
| 1346.7495 | 1356.0344 | 1358.1269 |
| 1358.7634 | 1360.2392 | 1361.8308 |
| 1370.4554 | 1373.9421 | 1376.6374 |
| 1377.9540 | 1385.3153 | 1422.5098 |
| 1428.5530 | 1448.5208 | 1449.1365 |
| 1454.6587 | 1459.4310 | 1464.9671 |
| 1484.1719 | 1493.7911 | 1494.2937 |
| 1497.8295 | 1498.3063 | 1500.7736 |
| 1505.6558 | 1508.4477 | 1520.1765 |
| 1522.1790 | 1524.9454 | 1535.8018 |
| 1539.9606 | 1547.7360 | 1548.5399 |
| 1550.4735 | 1567.7116 | 1593.0002 |
| 1643.6873 | 1644.4906 | 1665.1534 |
| 1667.2152 | 1669.8332 | 1678.5490 |
| 1678.9505 | 1681.0994 | 1686.6965 |
| 1690.6603 | 1695.2077 | 1696.8286 |
| 1703.3348 | 1728.7948 | 3073.0476 |
| 3077.2376 | 3078.3160 | 3086.4396 |
| 3113.6646 | 3138.7437 | 3147.0447 |
| 3147.2946 | 3157.8000 | 3161.6576 |
| 3164.8359 | 3169.8514 | 3181.8805 |
| 3188.3816 | 3193.8701 | 3196.5611 |
| 3204.7245 | 3205.6502 | 3206.7936 |
| 3209.1997 | 3209.7363 | 3212.2084 |
| 3214.5398 | 3217.0915 | 3221.3179 |
| 3221.5077 | 3221.7071 | 3222.3142 |
| 3223.6012 | 3225.4579 | 3230.3512 |

|           |           |           |
|-----------|-----------|-----------|
| 3234.3465 | 3235.0391 | 3235.5260 |
| 3236.5152 | 3236.5912 | 3240.0774 |
| 3245.4449 | 3252.2262 | 3266.7356 |

**<sup>2</sup>TS5R<sup>c</sup>**

Zero-point correction=0.779158  
 Thermal correction to Energy=0.826612  
 Thermal correction to Enthalpy=0.827556  
 Thermal correction to Gibbs Free Energy=0.693779  
 Sum of electronic and zero-point Energies=-3207.931682  
 Sum of electronic and thermal Energies=-3207.884228  
 Sum of electronic and thermal Enthalpies=-3207.883284  
 Sum of electronic and thermal Free Energies=-3208.017061

Cartesian coordinate

|   |             |             |             |
|---|-------------|-------------|-------------|
| N | 2.10668700  | 1.38046200  | -1.73997700 |
| N | 3.14838000  | 0.47866700  | -1.91926500 |
| C | 3.55610500  | 0.22932900  | -3.30381400 |
| C | 0.90222000  | 1.20121900  | -2.39496800 |
| C | -0.21915700 | 1.80756000  | -1.95675200 |
| C | -0.21352100 | 2.46526500  | -0.65528000 |
| C | 1.11481600  | 2.93713200  | -0.26428200 |
| C | 2.23789600  | 2.33550900  | -0.73073700 |
| C | -0.62978600 | 1.16527400  | 0.58888900  |
| C | -1.92653500 | 0.62118800  | 0.33333600  |
| C | -2.09974300 | -0.39022200 | -0.62243300 |
| O | -1.26345000 | -0.84731800 | -1.42685500 |
| S | 2.94648000  | -0.94458400 | -0.96606200 |
| O | 2.32206700  | -0.47481500 | 0.26639800  |
| C | 4.63654000  | -1.36382800 | -0.68016300 |
| O | 2.30837300  | -1.99414100 | -1.74982800 |
| C | 5.13432100  | -2.55402700 | -1.19678100 |
| C | 6.46919500  | -2.87064800 | -0.96228100 |
| C | 7.29484900  | -2.01210200 | -0.23271300 |
| C | 6.75717200  | -0.81903700 | 0.27176400  |
| C | 5.42983900  | -0.48314600 | 0.05677700  |
| C | 8.74452000  | -2.34341800 | -0.00147300 |
| H | 3.69899300  | 1.19672900  | -3.78701700 |
| H | 4.51192200  | -0.29789000 | -3.27723200 |
| H | 2.83454700  | -0.37197700 | -3.86574700 |
| H | -1.13837400 | 1.67930600  | -2.51376000 |
| H | -1.02111000 | 3.17297900  | -0.47617400 |
| H | 1.21611800  | 3.72055400  | 0.47733600  |

|   |             |             |             |
|---|-------------|-------------|-------------|
| H | 0.17331400  | 0.47219500  | 0.32544200  |
| H | 4.48456700  | -3.21153400 | -1.76463500 |
| H | 6.87416000  | -3.79898200 | -1.35289600 |
| H | 7.38995700  | -0.14533000 | 0.84265500  |
| H | 5.01588700  | 0.44074800  | 0.45193500  |
| H | 8.95724400  | -3.38736600 | -0.23729100 |
| H | 9.38423400  | -1.71743200 | -0.63129200 |
| H | 9.02639700  | -2.15776500 | 1.03792900  |
| C | -0.42682700 | 1.81547300  | 1.91827400  |
| C | -1.31820900 | 2.77201700  | 2.41289100  |
| C | 0.70729400  | 1.48928800  | 2.66697000  |
| C | -1.08442800 | 3.38588600  | 3.63947300  |
| H | -2.19658700 | 3.04626300  | 1.83200400  |
| C | 0.93855300  | 2.10117300  | 3.89696400  |
| H | 1.40559600  | 0.75440800  | 2.27258700  |
| C | 0.04487000  | 3.05140400  | 4.38502200  |
| H | -1.78172800 | 4.12858500  | 4.01325500  |
| H | 1.81862500  | 1.83466500  | 4.47417300  |
| H | 0.22600500  | 3.53036700  | 5.34150300  |
| H | -2.78583300 | 0.95155000  | 0.91082000  |
| C | -2.02015800 | -3.95192400 | 1.86508500  |
| C | -1.53037100 | -3.23163900 | 0.76966700  |
| C | -0.34481700 | -2.50547000 | 0.85764900  |
| C | 0.31345700  | -2.46123600 | 2.08483000  |
| C | -0.19506600 | -3.14446500 | 3.19028900  |
| C | -1.35740800 | -3.90732200 | 3.08563300  |
| C | -3.24528800 | -4.74691500 | 1.48630900  |
| C | -3.11140800 | -4.80270900 | -0.05107500 |
| C | -2.41905100 | -3.47031200 | -0.43060100 |
| H | 0.06776700  | -1.99348400 | -0.00572900 |
| H | 1.23928200  | -1.90040100 | 2.16273500  |
| H | 0.33286800  | -3.10128400 | 4.13761300  |
| H | -1.72817200 | -4.46886300 | 3.93768700  |
| H | -4.15765100 | -4.22199100 | 1.79636600  |
| H | -2.41995100 | -5.60467900 | -0.31815800 |
| H | -3.27545600 | -5.74399100 | 1.93012400  |
| H | -1.90264300 | -3.49008700 | -1.39050700 |
| N | -3.51529300 | -2.45758500 | -0.55050300 |
| O | -4.28385900 | -5.05706400 | -0.79335200 |
| C | -3.41523600 | -1.11894100 | -0.60520200 |
| C | -4.85305000 | -2.75433700 | -0.57847100 |
| N | -4.66449000 | -0.66211600 | -0.66110800 |
| N | -5.57683800 | -1.67188800 | -0.64023700 |
| C | -5.34499500 | -4.17005400 | -0.54000500 |

|    |             |             |             |
|----|-------------|-------------|-------------|
| H  | -5.82678600 | -4.36434700 | 0.42630600  |
| H  | -6.08806100 | -4.31494700 | -1.32602600 |
| C  | -5.09296900 | 0.70034200  | -0.75786600 |
| C  | -6.10956700 | 1.13779300  | 0.08208100  |
| C  | -4.48560800 | 1.54349700  | -1.68278800 |
| C  | -6.51880900 | 2.46343500  | 0.00788800  |
| C  | -4.88866200 | 2.87099700  | -1.74784500 |
| C  | -5.89806300 | 3.31887200  | -0.89835700 |
| H  | -7.30746600 | 2.83381200  | 0.65204800  |
| H  | -4.43898100 | 3.55106500  | -2.46171900 |
| H  | -3.72442300 | 1.16212300  | -2.35571500 |
| H  | -6.56999900 | 0.44914200  | 0.78152100  |
| Cl | -6.39851400 | 4.97907400  | -0.97770700 |
| H  | 0.93063600  | 0.55764000  | -3.26515500 |
| C  | 3.59617600  | 2.65153200  | -0.23551300 |
| C  | 4.67719900  | 2.81594700  | -1.10987800 |
| C  | 3.80179300  | 2.78414500  | 1.14033500  |
| C  | 5.94340400  | 3.09550800  | -0.61350300 |
| H  | 4.52169800  | 2.72844300  | -2.18056100 |
| C  | 5.07347100  | 3.06423500  | 1.63623000  |
| H  | 2.96661900  | 2.64317100  | 1.81977300  |
| C  | 6.14629700  | 3.21333200  | 0.76221500  |
| H  | 6.77400200  | 3.22329700  | -1.29957700 |
| H  | 5.22449300  | 3.15810100  | 2.70656700  |
| H  | 7.13766400  | 3.42659900  | 1.14877500  |

Variable frequencies

|           |          |          |
|-----------|----------|----------|
| -168.8841 | 12.1921  | 14.3803  |
| 21.0365   | 22.6775  | 26.5849  |
| 29.6208   | 34.3014  | 38.8755  |
| 49.9418   | 55.8335  | 56.6687  |
| 59.8979   | 61.8703  | 65.8739  |
| 71.1897   | 75.4010  | 78.0491  |
| 82.9777   | 93.0246  | 98.9058  |
| 105.5061  | 113.0235 | 127.1609 |
| 142.2373  | 145.7898 | 156.1125 |
| 173.7103  | 181.2485 | 188.8302 |
| 197.3303  | 205.4379 | 217.5137 |
| 219.0250  | 224.9195 | 232.6413 |
| 238.3090  | 250.4339 | 256.2353 |
| 262.2089  | 276.8861 | 282.1174 |
| 292.3572  | 296.3716 | 310.1548 |
| 312.7962  | 319.8377 | 339.8800 |
| 346.7627  | 350.4169 | 364.2806 |

|           |           |           |
|-----------|-----------|-----------|
| 368.7261  | 386.9776  | 390.3426  |
| 400.5009  | 416.4771  | 417.8431  |
| 425.2714  | 425.4832  | 434.4473  |
| 443.8911  | 452.4566  | 461.3415  |
| 462.0446  | 481.8590  | 494.7621  |
| 497.0530  | 500.1229  | 515.7650  |
| 529.4038  | 542.3193  | 545.5091  |
| 550.3484  | 559.6480  | 567.3115  |
| 578.0851  | 584.8615  | 592.1677  |
| 605.9748  | 607.8665  | 623.2476  |
| 627.9951  | 632.9929  | 635.4923  |
| 642.5820  | 642.9540  | 654.8233  |
| 666.9911  | 681.0323  | 686.7188  |
| 708.4335  | 714.2781  | 717.8449  |
| 725.6354  | 728.7175  | 729.1901  |
| 731.3180  | 756.1573  | 757.6217  |
| 767.4456  | 782.8201  | 786.0646  |
| 788.2780  | 791.7399  | 798.1830  |
| 810.2272  | 822.4749  | 828.6452  |
| 840.1069  | 843.5632  | 846.7450  |
| 854.7603  | 856.8694  | 867.4970  |
| 873.5375  | 878.7609  | 886.9165  |
| 888.6540  | 893.0781  | 900.5288  |
| 917.3789  | 920.8694  | 952.7905  |
| 957.6495  | 966.2480  | 983.2353  |
| 987.4297  | 988.5335  | 992.0625  |
| 1000.4452 | 1005.2173 | 1006.8334 |
| 1007.1235 | 1013.9526 | 1015.4721 |
| 1015.8804 | 1017.6680 | 1028.5140 |
| 1028.7984 | 1032.8682 | 1034.1523 |
| 1036.3583 | 1040.9980 | 1043.5651 |
| 1059.7539 | 1068.0252 | 1068.6263 |
| 1072.5420 | 1073.8830 | 1077.3276 |
| 1090.4107 | 1095.9563 | 1113.9010 |
| 1118.6818 | 1119.8098 | 1123.8057 |
| 1129.9103 | 1135.8596 | 1137.3293 |
| 1142.3898 | 1148.7236 | 1150.0713 |
| 1156.5677 | 1160.6378 | 1165.6545 |
| 1172.9444 | 1177.8304 | 1180.7905 |
| 1183.1605 | 1185.3672 | 1189.6596 |
| 1203.5355 | 1204.9094 | 1207.2913 |
| 1207.4241 | 1211.8572 | 1215.4763 |
| 1218.1996 | 1227.4270 | 1234.6780 |
| 1246.0966 | 1256.4437 | 1257.5095 |

|           |           |           |
|-----------|-----------|-----------|
| 1265.3487 | 1282.4932 | 1288.2576 |
| 1299.8914 | 1308.8683 | 1314.0696 |
| 1320.6781 | 1321.3185 | 1326.7617 |
| 1335.4040 | 1337.9611 | 1341.0694 |
| 1344.4585 | 1351.2647 | 1354.9210 |
| 1361.3664 | 1362.0472 | 1366.9970 |
| 1369.2897 | 1369.9289 | 1376.1827 |
| 1378.4093 | 1385.2850 | 1423.5402 |
| 1425.5390 | 1443.7463 | 1453.0820 |
| 1456.0316 | 1458.5222 | 1467.9104 |
| 1481.2965 | 1491.6617 | 1497.0118 |
| 1499.5682 | 1500.9125 | 1504.4558 |
| 1506.6275 | 1512.7353 | 1518.3701 |
| 1520.7203 | 1522.6123 | 1532.9387 |
| 1544.4151 | 1548.8880 | 1551.8612 |
| 1552.9391 | 1567.1744 | 1594.8765 |
| 1624.3362 | 1639.7731 | 1665.9404 |
| 1667.8327 | 1671.6034 | 1678.3266 |
| 1678.7799 | 1687.0297 | 1689.7630 |
| 1690.7997 | 1696.9180 | 1698.5357 |
| 1701.0323 | 1719.1767 | 3074.1774 |
| 3076.9396 | 3081.3911 | 3087.9486 |
| 3140.2609 | 3142.7053 | 3152.8214 |
| 3153.1248 | 3161.8769 | 3165.3240 |
| 3165.8508 | 3171.7510 | 3178.5671 |
| 3192.8905 | 3199.2525 | 3203.2494 |
| 3204.8865 | 3209.8444 | 3210.8548 |
| 3211.2365 | 3214.4889 | 3215.4917 |
| 3216.4946 | 3221.5062 | 3223.8545 |
| 3225.5146 | 3227.4135 | 3231.2582 |
| 3232.1619 | 3232.3960 | 3235.4904 |
| 3235.5217 | 3236.7033 | 3241.1148 |
| 3242.3376 | 3244.6220 | 3250.4312 |
| 3251.8272 | 3254.1261 | 3270.3703 |

## **<sup>2</sup>TS5R<sup>d</sup>**

Zero-point correction=0.778749

Thermal correction to Energy=0.826215

Thermal correction to Enthalpy=0.827159

Thermal correction to Gibbs Free Energy=0.693115

Sum of electronic and zero-point Energies=-3207.923273

Sum of electronic and thermal Energies=-3207.875807

Sum of electronic and thermal Enthalpies=-3207.874863

Sum of electronic and thermal Free Energies=-3208.008907

Cartesian coordinate

|   |             |             |             |
|---|-------------|-------------|-------------|
| N | -1.68602900 | -0.60844800 | -1.17054600 |
| N | -2.69353900 | -1.46577600 | -0.73566700 |
| C | -2.22393900 | -2.67345700 | -0.05728700 |
| C | -1.82831200 | 0.75613800  | -0.91484700 |
| C | -1.00888300 | 1.63748100  | -1.54771100 |
| C | 0.00949700  | 1.22932200  | -2.50469600 |
| C | -0.01995600 | -0.18375200 | -2.82937700 |
| C | -0.82821200 | -1.03743300 | -2.16489700 |
| C | 1.77044100  | 1.68626800  | -1.94224100 |
| C | 2.10510200  | 1.08591300  | -0.69411900 |
| C | 2.31174300  | -0.29016600 | -0.57997600 |
| O | 2.24074900  | -1.14129400 | -1.49652300 |
| S | -3.89662500 | -1.73168300 | -1.95116500 |
| O | -3.96204000 | -0.46664700 | -2.66212600 |
| C | -5.32855700 | -1.95533200 | -0.94343800 |
| O | -3.59802300 | -2.97597200 | -2.64828300 |
| C | -5.87791900 | -3.22591900 | -0.80894100 |
| C | -7.00078500 | -3.37901000 | -0.00246200 |
| C | -7.56750700 | -2.28532900 | 0.65817300  |
| C | -6.98577100 | -1.02012800 | 0.49937400  |
| C | -5.86885100 | -0.84129500 | -0.30255300 |
| C | -2.90388400 | 1.19552500  | 0.00761900  |
| C | -3.70269300 | 2.28184500  | -0.36326800 |
| C | -4.70277900 | 2.74407200  | 0.48971400  |
| C | -4.91462100 | 2.12505300  | 1.71858100  |
| C | -4.12349800 | 1.03936400  | 2.09370700  |
| C | -3.12896800 | 0.57334900  | 1.24282100  |
| C | -8.80114700 | -2.45317800 | 1.50330100  |
| H | -1.60541500 | -2.36660400 | 0.78858000  |
| H | -3.10000500 | -3.20314700 | 0.32283900  |
| H | -1.65912600 | -3.34657700 | -0.71071100 |
| H | -1.13499800 | 2.69297300  | -1.33130500 |
| H | 0.11113600  | 1.89769300  | -3.36071100 |
| H | 0.61711900  | -0.57889100 | -3.61035300 |
| H | -0.88399100 | -2.09422600 | -2.39774500 |
| H | 2.23512100  | 1.19252800  | -2.79902700 |
| H | -5.43422100 | -4.06627500 | -1.33264000 |
| H | -7.44639500 | -4.36230800 | 0.11294600  |
| H | -7.41765700 | -0.16358200 | 1.00935400  |
| H | -5.42433400 | 0.14107100  | -0.43581500 |
| H | -3.55947300 | 2.74186100  | -1.33572700 |

|   |             |             |             |
|---|-------------|-------------|-------------|
| H | -5.32028100 | 3.58283200  | 0.18697700  |
| H | -5.69354600 | 2.48490900  | 2.38263600  |
| H | -4.28373400 | 0.55284000  | 3.04990500  |
| H | -2.52188100 | -0.27491700 | 1.54293800  |
| H | -8.77239000 | -1.80018300 | 2.37843500  |
| H | -9.69361200 | -2.19128200 | 0.92618900  |
| H | -8.91394500 | -3.48472700 | 1.84193200  |
| C | 1.78904200  | 3.17519500  | -2.01270700 |
| C | 2.19739700  | 3.81098900  | -3.18918200 |
| C | 1.35359100  | 3.96043000  | -0.93807300 |
| C | 2.19328700  | 5.19908500  | -3.28399300 |
| H | 2.52993000  | 3.21101100  | -4.03273700 |
| C | 1.34773700  | 5.34813200  | -1.03293400 |
| H | 1.00640200  | 3.48434700  | -0.02279300 |
| C | 1.77025100  | 5.97155800  | -2.20521200 |
| H | 2.52270500  | 5.67728700  | -4.20063200 |
| H | 1.01042900  | 5.94324300  | -0.19039400 |
| H | 1.76627200  | 7.05386600  | -2.27832000 |
| H | 2.17890900  | 1.70636200  | 0.19062400  |
| C | 6.51676600  | -2.14204400 | -0.11497300 |
| C | 5.28888800  | -1.90101500 | -0.74053800 |
| C | 5.20717800  | -1.05607200 | -1.84596800 |
| C | 6.36853700  | -0.42830100 | -2.29072600 |
| C | 7.58884600  | -0.64939900 | -1.65170000 |
| C | 7.67316900  | -1.51638600 | -0.56482200 |
| C | 6.37605300  | -3.13486900 | 1.00786300  |
| C | 5.02473300  | -3.80187400 | 0.68031800  |
| C | 4.20136900  | -2.72889800 | -0.08578900 |
| H | 4.26303900  | -0.90509400 | -2.35582700 |
| H | 6.32530200  | 0.22971200  | -3.15210300 |
| H | 8.48402700  | -0.15617800 | -2.01636700 |
| H | 8.62755500  | -1.70928800 | -0.08479200 |
| H | 6.35645200  | -2.61735700 | 1.97387700  |
| H | 5.19484300  | -4.62024600 | -0.02237900 |
| H | 7.18666100  | -3.86524700 | 1.04917600  |
| H | 3.47233000  | -3.14345100 | -0.77944600 |
| N | 3.42242200  | -1.96014900 | 0.93602700  |
| O | 4.32776800  | -4.37801800 | 1.76391500  |
| C | 2.67839100  | -0.84863100 | 0.77143900  |
| C | 3.42212500  | -2.24490500 | 2.27520800  |
| N | 2.29091300  | -0.49288400 | 2.00242800  |
| N | 2.74914100  | -1.35534700 | 2.94807200  |
| C | 4.06473100  | -3.48596700 | 2.81793700  |
| H | 4.96525800  | -3.23046200 | 3.38838500  |



|    |             |             |            |
|----|-------------|-------------|------------|
| H  | 3.36349700  | -3.97718600 | 3.49491200 |
| C  | 1.55079100  | 0.66364900  | 2.42449400 |
| C  | 2.12681400  | 1.48424900  | 3.38742000 |
| C  | 0.31385400  | 0.95100000  | 1.85950500 |
| C  | 1.45915600  | 2.63836500  | 3.77928100 |
| C  | -0.34421800 | 2.11611500  | 2.23664800 |
| C  | 0.23806900  | 2.94953600  | 3.18896300 |
| H  | 1.88669000  | 3.29766100  | 4.52522400 |
| H  | -1.30348900 | 2.37344500  | 1.80135800 |
| H  | -0.11606200 | 0.29180600  | 1.11144100 |
| H  | 3.08719600  | 1.22391600  | 3.81831400 |
| Cl | -0.58415600 | 4.40722500  | 3.65145600 |

Variable frequencies

|           |          |          |
|-----------|----------|----------|
| -236.0521 | 12.2228  | 16.8625  |
| 19.0635   | 21.7686  | 25.1344  |
| 27.4079   | 31.2535  | 36.4341  |
| 47.2187   | 50.4870  | 52.0321  |
| 58.5486   | 63.0867  | 65.3509  |
| 70.0373   | 76.2887  | 85.7081  |
| 88.7907   | 94.4637  | 108.9174 |
| 113.1225  | 120.6986 | 126.7373 |
| 148.6681  | 152.3876 | 158.6726 |
| 170.2797  | 178.0255 | 180.6341 |
| 183.3171  | 193.9472 | 198.8467 |
| 214.0139  | 225.4040 | 240.1964 |
| 249.9000  | 251.1399 | 257.5027 |
| 260.5509  | 262.7382 | 277.9979 |
| 286.7583  | 300.0183 | 309.0928 |
| 313.5038  | 328.1269 | 343.8460 |
| 349.1075  | 361.9622 | 368.2781 |
| 370.8190  | 384.3182 | 384.9674 |
| 405.4138  | 417.0358 | 419.5610 |
| 420.9162  | 425.5691 | 431.9037 |
| 442.8140  | 449.4826 | 456.9999 |
| 466.4452  | 490.8285 | 492.1913 |
| 495.7644  | 508.4863 | 512.9272 |
| 527.5469  | 538.0186 | 542.5425 |
| 555.3065  | 567.2802 | 568.2275 |
| 585.1035  | 590.0203 | 600.6594 |
| 606.2020  | 609.8210 | 625.6977 |
| 628.4471  | 631.7310 | 640.7387 |
| 643.7918  | 645.1690 | 653.7074 |
| 660.2300  | 676.9195 | 694.3971 |

|           |           |           |
|-----------|-----------|-----------|
| 709.6286  | 711.1555  | 719.0584  |
| 720.7034  | 721.5216  | 726.8321  |
| 730.3255  | 753.7202  | 756.8695  |
| 767.1177  | 776.6547  | 785.0633  |
| 789.0916  | 791.3579  | 797.0003  |
| 813.0814  | 826.6633  | 839.4262  |
| 844.3906  | 844.6150  | 849.6880  |
| 851.8855  | 853.9399  | 864.5062  |
| 875.4914  | 881.1788  | 883.4937  |
| 886.4369  | 896.0104  | 899.0053  |
| 913.2671  | 925.1935  | 940.8256  |
| 952.3748  | 960.5287  | 965.0380  |
| 979.9155  | 988.4703  | 996.9288  |
| 1000.7389 | 1004.0786 | 1008.9972 |
| 1011.9054 | 1014.6377 | 1015.9525 |
| 1016.9847 | 1018.9324 | 1028.1511 |
| 1028.9308 | 1030.4896 | 1034.6042 |
| 1035.1052 | 1038.2469 | 1044.8852 |
| 1055.6450 | 1066.4474 | 1067.5873 |
| 1069.7984 | 1072.6916 | 1079.4093 |
| 1081.7084 | 1095.9119 | 1100.4006 |
| 1118.0628 | 1119.8130 | 1125.2538 |
| 1130.2454 | 1131.6978 | 1134.3176 |
| 1137.1577 | 1146.1255 | 1148.2829 |
| 1157.0831 | 1159.4600 | 1167.8414 |
| 1177.2004 | 1180.2438 | 1182.4616 |
| 1184.7935 | 1187.7650 | 1190.8372 |
| 1199.1049 | 1201.7574 | 1203.2437 |
| 1211.2512 | 1213.8396 | 1216.5994 |
| 1218.3435 | 1219.5565 | 1236.2303 |
| 1242.3017 | 1255.8403 | 1259.6199 |
| 1261.6904 | 1274.5968 | 1289.1823 |
| 1297.4750 | 1300.9393 | 1316.7926 |
| 1317.8431 | 1320.9472 | 1325.3950 |
| 1334.1183 | 1336.6036 | 1343.9468 |
| 1344.0126 | 1351.4727 | 1354.3764 |
| 1359.7159 | 1362.8426 | 1365.5089 |
| 1368.0074 | 1371.8239 | 1374.2817 |
| 1380.5811 | 1381.2091 | 1420.7515 |
| 1426.0391 | 1446.7641 | 1456.0362 |
| 1457.1748 | 1458.4486 | 1461.2597 |
| 1487.4565 | 1491.8670 | 1496.6267 |
| 1497.9492 | 1500.4016 | 1503.2097 |
| 1505.1080 | 1505.7428 | 1506.8413 |

|           |           |           |
|-----------|-----------|-----------|
| 1511.5072 | 1523.7753 | 1532.9521 |
| 1537.2590 | 1544.3535 | 1550.6696 |
| 1554.8352 | 1569.1025 | 1572.4054 |
| 1619.6277 | 1636.2383 | 1668.5340 |
| 1669.1823 | 1671.4576 | 1674.6990 |
| 1679.5944 | 1681.1057 | 1686.5246 |
| 1691.0373 | 1696.4297 | 1699.8570 |
| 1703.1843 | 1721.7825 | 3073.1260 |
| 3074.0077 | 3078.2978 | 3089.5665 |
| 3126.3809 | 3135.1564 | 3141.4107 |
| 3151.0082 | 3152.1787 | 3159.1274 |
| 3167.1079 | 3170.0767 | 3179.9832 |
| 3184.6649 | 3196.8624 | 3197.5283 |
| 3206.4825 | 3208.9147 | 3213.3873 |
| 3215.6121 | 3221.5043 | 3222.4702 |
| 3224.7677 | 3225.0669 | 3226.9261 |
| 3230.3335 | 3230.8676 | 3232.9324 |
| 3233.6155 | 3234.7212 | 3239.1011 |
| 3240.3376 | 3241.0607 | 3242.8594 |
| 3246.1132 | 3247.0629 | 3248.6637 |
| 3250.3813 | 3253.6101 | 3255.2168 |

<sup>2</sup>TS5R<sup>e</sup>

Zero-point correction=0.778086

Thermal correction to Energy=0.825822

Thermal correction to Enthalpy=0.826766

Thermal correction to Gibbs Free Energy=0.691752

Sum of electronic and zero-point Energies=-3207.928844

Sum of electronic and thermal Energies=-3207.881108

Sum of electronic and thermal Enthalpies=-3207.880164

Sum of electronic and thermal Free Energies=-3208.015177

Cartesian coordinate

|   |             |            |             |
|---|-------------|------------|-------------|
| N | -2.34067100 | 1.47181600 | 0.45211100  |
| N | -3.45435900 | 1.51325200 | -0.38154800 |
| C | -3.27942100 | 2.37648800 | -1.55488800 |
| C | -1.76108600 | 0.24431300 | 0.72555200  |
| C | -0.63901500 | 0.20582800 | 1.49159700  |
| C | 0.00733700  | 1.41641300 | 1.94571800  |
| C | -0.83249700 | 2.59596300 | 1.90285800  |
| C | -1.93470400 | 2.61075500 | 1.12053600  |
| C | 1.43109400  | 1.80248800 | 0.65031300  |
| C | 2.27710600  | 0.66785500 | 0.56354900  |

|   |             |             |             |
|---|-------------|-------------|-------------|
| C | 2.04808300  | -0.30479900 | -0.41749200 |
| O | 1.12468400  | -0.36328000 | -1.25573500 |
| S | -4.91063800 | 1.77772700  | 0.50333400  |
| O | -4.75419100 | 0.97003600  | 1.70171900  |
| C | -6.07934000 | 1.08347500  | -0.62275600 |
| O | -5.16237800 | 3.20971600  | 0.62083900  |
| C | -7.21352900 | 1.82567300  | -0.93275700 |
| C | -8.16376900 | 1.26317200  | -1.77890300 |
| C | -7.98603100 | -0.01580800 | -2.31218000 |
| C | -6.82407100 | -0.72958700 | -1.98740000 |
| C | -5.86570500 | -0.19434800 | -1.14047800 |
| C | -2.41165300 | -0.97692200 | 0.18116800  |
| C | -3.32547500 | -1.68644500 | 0.96444100  |
| C | -3.91633600 | -2.84397000 | 0.45903500  |
| C | -3.59666800 | -3.28960500 | -0.82281100 |
| C | -2.67630300 | -2.58343300 | -1.59915800 |
| C | -2.07926700 | -1.42862200 | -1.09824200 |
| C | -9.02537000 | -0.63229200 | -3.20887000 |
| H | -2.42801800 | 1.99471300  | -2.11996200 |
| H | -4.17823600 | 2.29570200  | -2.16848100 |
| H | -3.12074400 | 3.42634100  | -1.28720100 |
| H | -0.19377700 | -0.76145400 | 1.69665900  |
| H | 0.66977700  | 1.32677900  | 2.80303100  |
| H | -0.54977000 | 3.49362700  | 2.43806900  |
| H | -2.57977100 | 3.47421700  | 0.99896200  |
| H | 0.76630800  | 1.90169100  | -0.20936600 |
| H | -7.33832400 | 2.82130300  | -0.52090600 |
| H | -9.05494300 | 1.82931900  | -2.03128500 |
| H | -6.66999800 | -1.71989400 | -2.40669300 |
| H | -4.96159500 | -0.74415500 | -0.89858500 |
| H | -3.58276700 | -1.31885400 | 1.95179900  |
| H | -4.62471600 | -3.39560600 | 1.06793400  |
| H | -4.05605500 | -4.19148900 | -1.21422000 |
| H | -2.41918500 | -2.93593300 | -2.59272500 |
| H | -1.33973300 | -0.88381400 | -1.67926200 |
| H | -8.56019700 | -1.13559300 | -4.06001300 |
| H | -9.60324900 | -1.38229100 | -2.65968000 |
| H | -9.72185200 | 0.11780400  | -3.58688100 |
| C | 1.99394300  | 3.08883600  | 1.13055900  |
| C | 1.59486200  | 4.27914600  | 0.51225600  |
| C | 2.92340900  | 3.15023900  | 2.17519800  |
| C | 2.13773800  | 5.50024300  | 0.90361500  |
| H | 0.86527500  | 4.24005400  | -0.29287700 |
| C | 3.46464500  | 4.36894000  | 2.56758100  |

|    |             |             |             |
|----|-------------|-------------|-------------|
| H  | 3.23338400  | 2.23947900  | 2.68120000  |
| C  | 3.07951300  | 5.54728300  | 1.92881600  |
| H  | 1.82720100  | 6.41323600  | 0.40590900  |
| H  | 4.18939500  | 4.40153000  | 3.37467200  |
| H  | 3.50506900  | 6.49695800  | 2.23556400  |
| H  | 3.15683600  | 0.57536400  | 1.19344300  |
| C  | 6.43315000  | 0.96094800  | -1.13505900 |
| C  | 5.08486900  | 0.93538500  | -1.50670900 |
| C  | 4.26865700  | 2.04780100  | -1.32577900 |
| C  | 4.80666000  | 3.17370100  | -0.70468100 |
| C  | 6.14135900  | 3.18534400  | -0.29681000 |
| C  | 6.96928000  | 2.08686000  | -0.52189300 |
| C  | 7.12977000  | -0.31176200 | -1.54182300 |
| C  | 6.16878900  | -0.85865400 | -2.61971900 |
| C  | 4.76058400  | -0.37991600 | -2.17428100 |
| H  | 3.23590700  | 2.04403800  | -1.66178700 |
| H  | 4.18403400  | 4.04735500  | -0.53651900 |
| H  | 6.54328900  | 4.07199800  | 0.18295700  |
| H  | 8.01661700  | 2.11535200  | -0.23744000 |
| H  | 7.21985200  | -0.99522800 | -0.68903800 |
| H  | 6.37984200  | -0.35658400 | -3.56639200 |
| H  | 8.13360300  | -0.15241600 | -1.94014100 |
| H  | 4.04685800  | -0.30984000 | -2.99797500 |
| N  | 4.22332500  | -1.41934400 | -1.24275200 |
| O  | 6.24102300  | -2.23636900 | -2.90215500 |
| C  | 3.09250000  | -1.40463000 | -0.51262400 |
| C  | 4.78156400  | -2.66391800 | -1.07680800 |
| N  | 3.01587100  | -2.60355700 | 0.05624100  |
| N  | 4.06400200  | -3.40075800 | -0.27893800 |
| C  | 6.03648200  | -3.06937300 | -1.78708600 |
| H  | 6.88505700  | -3.04910500 | -1.09250700 |
| H  | 5.92228900  | -4.08952800 | -2.15634900 |
| C  | 1.94066100  | -3.11890500 | 0.85229300  |
| C  | 2.22849500  | -3.70527300 | 2.07917800  |
| C  | 0.65015600  | -3.06340800 | 0.33857600  |
| C  | 1.18452000  | -4.23453000 | 2.82715600  |
| C  | -0.39134000 | -3.59924600 | 1.08645500  |
| C  | -0.11351300 | -4.17284200 | 2.32318600  |
| H  | 1.37114800  | -4.69367000 | 3.79081700  |
| H  | -1.40527900 | -3.58203600 | 0.70371900  |
| H  | 0.46281900  | -2.60464000 | -0.62709600 |
| H  | 3.25084100  | -3.74822600 | 2.43817800  |
| Cl | -1.42224000 | -4.83435100 | 3.25655300  |

Variable frequencies

|           |          |          |
|-----------|----------|----------|
| -157.2548 | 8.2147   | 17.2292  |
| 18.2855   | 20.7684  | 23.7495  |
| 29.7882   | 33.7065  | 40.2857  |
| 46.8031   | 51.6375  | 57.6378  |
| 60.1010   | 63.7618  | 66.4919  |
| 76.5518   | 79.1035  | 82.0816  |
| 87.9279   | 100.6016 | 102.3875 |
| 104.5269  | 109.4181 | 120.1171 |
| 126.6937  | 138.8254 | 149.4195 |
| 157.0996  | 161.5941 | 183.6367 |
| 184.4406  | 188.3464 | 199.1752 |
| 210.8472  | 229.4503 | 235.6558 |
| 244.5936  | 251.0306 | 251.3334 |
| 258.2122  | 261.1670 | 273.6124 |
| 280.2733  | 285.1934 | 311.1865 |
| 312.7020  | 326.9946 | 340.0978 |
| 346.3184  | 349.5493 | 359.6254 |
| 376.7967  | 379.0544 | 383.5471 |
| 403.7522  | 411.7572 | 415.8564 |
| 416.1195  | 417.7735 | 431.4853 |
| 438.6183  | 453.6488 | 459.0345 |
| 460.4360  | 484.1195 | 498.0660 |
| 499.6575  | 507.7396 | 522.8917 |
| 526.7816  | 538.5143 | 540.4900 |
| 558.1024  | 561.3841 | 573.4564 |
| 584.4170  | 590.8521 | 592.9905 |
| 605.3814  | 606.8873 | 615.6854 |
| 626.9094  | 627.9445 | 638.9824 |
| 640.3906  | 642.8012 | 652.2809 |
| 668.0193  | 693.0303 | 699.6984 |
| 711.2408  | 716.9124 | 717.4283 |
| 720.9428  | 723.4905 | 726.4387 |
| 728.0823  | 758.6441 | 763.3855 |
| 768.9306  | 774.6789 | 778.3546 |
| 788.7911  | 798.8775 | 802.5614 |
| 806.0027  | 814.2739 | 831.1002 |
| 841.9864  | 842.1328 | 852.1141 |
| 854.2747  | 859.7958 | 869.1550 |
| 871.9230  | 872.5000 | 878.7091 |
| 882.6741  | 887.7439 | 900.2873 |
| 911.0738  | 912.9168 | 943.0112 |
| 958.0614  | 975.6375 | 981.4362 |
| 989.5273  | 992.1495 | 992.8244 |

|           |           |           |
|-----------|-----------|-----------|
| 997.5284  | 1003.4166 | 1005.4851 |
| 1006.9479 | 1009.9854 | 1015.9249 |
| 1016.8096 | 1018.4885 | 1020.3099 |
| 1024.0055 | 1026.7093 | 1027.8760 |
| 1036.4426 | 1037.1867 | 1044.1520 |
| 1054.3869 | 1066.0735 | 1066.7946 |
| 1069.5290 | 1072.8201 | 1073.6565 |
| 1086.2548 | 1094.8808 | 1098.9850 |
| 1112.4537 | 1115.6979 | 1116.7653 |
| 1123.4669 | 1124.5848 | 1130.2534 |
| 1134.1402 | 1139.7158 | 1151.0355 |
| 1151.1835 | 1153.5278 | 1161.9541 |
| 1174.8537 | 1177.0454 | 1180.5521 |
| 1183.2689 | 1183.8824 | 1187.4054 |
| 1200.2114 | 1202.1905 | 1205.6061 |
| 1206.7824 | 1207.7583 | 1216.7429 |
| 1220.5404 | 1221.6002 | 1237.8358 |
| 1247.2070 | 1253.6299 | 1257.3996 |
| 1267.3816 | 1278.7180 | 1288.3338 |
| 1300.6050 | 1302.5549 | 1315.6098 |
| 1322.1356 | 1324.1717 | 1326.1450 |
| 1335.3564 | 1339.2000 | 1339.8003 |
| 1344.5851 | 1356.2224 | 1358.2157 |
| 1358.3971 | 1360.3175 | 1360.8744 |
| 1362.1751 | 1368.5074 | 1375.4638 |
| 1376.2757 | 1383.5732 | 1423.5138 |
| 1426.8278 | 1449.3469 | 1453.4982 |
| 1457.4134 | 1459.0982 | 1468.0665 |
| 1493.3011 | 1495.1495 | 1495.9541 |
| 1497.7027 | 1498.4393 | 1498.8955 |
| 1503.4391 | 1504.1734 | 1506.5651 |
| 1514.1147 | 1519.2145 | 1536.0459 |
| 1538.6376 | 1543.7785 | 1545.5687 |
| 1553.6229 | 1567.9101 | 1587.8161 |
| 1626.0089 | 1646.7949 | 1668.6976 |
| 1669.0793 | 1669.3774 | 1673.2452 |
| 1676.7229 | 1685.1695 | 1689.2805 |
| 1691.5691 | 1691.7847 | 1694.6080 |
| 1705.2221 | 1721.2762 | 3072.2301 |
| 3076.4873 | 3079.6618 | 3088.5776 |
| 3143.5574 | 3147.9031 | 3148.5195 |
| 3149.1593 | 3157.2559 | 3162.6370 |
| 3168.2020 | 3178.1199 | 3184.7202 |
| 3190.2618 | 3190.8749 | 3192.3968 |

|           |           |           |
|-----------|-----------|-----------|
| 3202.7751 | 3205.7024 | 3206.3455 |
| 3210.4860 | 3211.1952 | 3214.5541 |
| 3217.1454 | 3219.1304 | 3219.3659 |
| 3222.8386 | 3227.7710 | 3228.8282 |
| 3229.9234 | 3230.4096 | 3234.2250 |
| 3235.2387 | 3237.2401 | 3242.7085 |
| 3243.3400 | 3243.7119 | 3252.1865 |
| 3252.6894 | 3254.3180 | 3258.3373 |

## <sup>2</sup>TS5R<sup>f</sup>

Zero-point correction=0.778710

Thermal correction to Energy=0.826159

Thermal correction to Enthalpy=0.827103

Thermal correction to Gibbs Free Energy=0.693481

Sum of electronic and zero-point Energies=-3207.932064

Sum of electronic and thermal Energies=-3207.884614

Sum of electronic and thermal Enthalpies=-3207.883670

Sum of electronic and thermal Free Energies=-3208.017293

### Cartesian coordinate

|   |             |             |             |
|---|-------------|-------------|-------------|
| N | 2.59645800  | 0.21469500  | 0.01088300  |
| N | 3.88371700  | 0.33951800  | 0.51881500  |
| C | 3.95365200  | 0.45558000  | 1.97697700  |
| C | 2.33032500  | -0.82087800 | -0.87102400 |
| C | 1.09885900  | -0.88907500 | -1.44665700 |
| C | 0.01868900  | 0.00657600  | -1.07517500 |
| C | 0.47676300  | 1.21288200  | -0.40521800 |
| C | 1.70779900  | 1.26412700  | 0.14337000  |
| C | -1.05761100 | -0.93654700 | 0.10748100  |
| C | -2.26803700 | -0.19147800 | 0.25723400  |
| C | -3.17990600 | -0.18097100 | -0.80381100 |
| O | -3.05598900 | -0.73874400 | -1.91569000 |
| S | 4.81958600  | 1.49434500  | -0.35856900 |
| O | 4.36540300  | 1.34891800  | -1.73133600 |
| C | 6.43427900  | 0.81548000  | -0.15437900 |
| O | 4.74841400  | 2.78309500  | 0.31997700  |
| C | 7.36265700  | 1.47712200  | 0.64459000  |
| C | 8.62871200  | 0.92152100  | 0.78268900  |
| C | 8.96668900  | -0.27422700 | 0.13867700  |
| C | 8.00810100  | -0.90910800 | -0.65868000 |
| C | 6.73681200  | -0.37290300 | -0.81371900 |
| C | 3.40301500  | -1.79799500 | -1.17160300 |
| C | 3.78752500  | -1.99292700 | -2.49952800 |



|   |             |             |             |
|---|-------------|-------------|-------------|
| C | 4.78046600  | -2.92075100 | -2.80849900 |
| C | 5.38808800  | -3.65525400 | -1.79366100 |
| C | 4.99995400  | -3.46559700 | -0.46687700 |
| C | 4.01146800  | -2.54043300 | -0.15428000 |
| C | 10.33790500 | -0.86780200 | 0.32081900  |
| H | 3.46135400  | -0.41975500 | 2.40460100  |
| H | 5.00809100  | 0.45134700  | 2.26062100  |
| H | 3.48466500  | 1.37034600  | 2.35561000  |
| H | 0.90379900  | -1.70932800 | -2.12895700 |
| H | -0.74338600 | 0.13706000  | -1.84443300 |
| H | -0.19609300 | 2.05131500  | -0.26614200 |
| H | 2.08813100  | 2.12278900  | 0.68586500  |
| H | -1.19938900 | -1.79609700 | -0.55240600 |
| H | 7.09250900  | 2.40762700  | 1.13303900  |
| H | 9.37042400  | 1.42562400  | 1.39520400  |
| H | 8.26003500  | -1.83380100 | -1.16951000 |
| H | 5.99614600  | -0.85833300 | -1.44249700 |
| H | 3.32737000  | -1.39570900 | -3.28045500 |
| H | 5.08266100  | -3.06139800 | -3.84084400 |
| H | 6.16284500  | -4.37626300 | -2.03388300 |
| H | 5.47128200  | -4.03874900 | 0.32466800  |
| H | 3.70217000  | -2.38989300 | 0.87633100  |
| H | 10.43684800 | -1.30017100 | 1.32157600  |
| H | 10.52980300 | -1.65666800 | -0.40818100 |
| H | 11.11208300 | -0.10362300 | 0.21755300  |
| C | -0.23672900 | -1.25402600 | 1.30746900  |
| C | 0.48096000  | -2.45427200 | 1.35198100  |
| C | -0.11415400 | -0.35978400 | 2.37787900  |
| C | 1.28179200  | -2.76642400 | 2.44739300  |
| H | 0.40897600  | -3.15014900 | 0.51958400  |
| C | 0.68509700  | -0.66889500 | 3.47362900  |
| H | -0.64231900 | 0.58969700  | 2.35464700  |
| C | 1.38326300  | -1.87512300 | 3.51362900  |
| H | 1.82008000  | -3.70883700 | 2.46969500  |
| H | 0.76255900  | 0.03187300  | 4.29878400  |
| H | 1.99988200  | -2.11996700 | 4.37261600  |
| H | -2.47545300 | 0.39508500  | 1.14668800  |
| C | -6.47325300 | -2.82600900 | 0.69856000  |
| C | -5.46731400 | -2.46930400 | -0.20445900 |
| C | -4.21010600 | -3.06495100 | -0.15580100 |
| C | -3.96036000 | -4.00142900 | 0.84530100  |
| C | -4.95439800 | -4.34178200 | 1.76352800  |
| C | -6.22136000 | -3.76530600 | 1.69120100  |
| C | -7.75847600 | -2.09837400 | 0.39757200  |

|    |             |             |             |
|----|-------------|-------------|-------------|
| C  | -7.53169800 | -1.64140100 | -1.05952900 |
| C  | -5.99732100 | -1.45492900 | -1.19066900 |
| H  | -3.45312800 | -2.81336300 | -0.89183300 |
| H  | -2.98733700 | -4.47785200 | 0.90535300  |
| H  | -4.74470000 | -5.07809700 | 2.53258900  |
| H  | -7.00058600 | -4.05447600 | 2.38953800  |
| H  | -7.88622300 | -1.24857400 | 1.07877700  |
| H  | -7.80587800 | -2.45721100 | -1.73169300 |
| H  | -8.64769100 | -2.72505400 | 0.49029400  |
| H  | -5.61972900 | -1.56690600 | -2.20789400 |
| N  | -5.69818800 | -0.05060500 | -0.78642100 |
| O  | -8.27503200 | -0.52771500 | -1.50323600 |
| C  | -4.49750100 | 0.51630000  | -0.58927100 |
| C  | -6.63826300 | 0.92323200  | -0.57366700 |
| N  | -4.74495600 | 1.78551500  | -0.27234100 |
| N  | -6.07897300 | 2.05573800  | -0.25156500 |
| C  | -8.10064900 | 0.64041700  | -0.73880900 |
| H  | -8.58028600 | 0.57020800  | 0.24520400  |
| H  | -8.56559200 | 1.46207800  | -1.28582600 |
| C  | -3.79382100 | 2.84091300  | -0.09175800 |
| C  | -3.92152500 | 3.68623500  | 1.00308100  |
| C  | -2.79515300 | 3.01277600  | -1.04523600 |
| C  | -3.01019400 | 4.72366100  | 1.15950100  |
| C  | -1.88352900 | 4.04927600  | -0.88526500 |
| C  | -1.99629000 | 4.89108500  | 0.21900600  |
| H  | -3.08288500 | 5.39814100  | 2.00450300  |
| H  | -1.10007000 | 4.21177000  | -1.61685100 |
| H  | -2.74437600 | 2.36170500  | -1.91281700 |
| H  | -4.72323500 | 3.53579400  | 1.71735600  |
| Cl | -0.85510900 | 6.18202600  | 0.42196100  |

#### Variable frequencies

|          |          |          |
|----------|----------|----------|
| -69.0962 | 14.1757  | 15.1974  |
| 19.2710  | 23.3114  | 26.4843  |
| 29.4668  | 36.2096  | 42.7981  |
| 47.3475  | 57.1977  | 60.1402  |
| 61.3937  | 64.5640  | 70.0797  |
| 74.8254  | 77.6379  | 81.8799  |
| 85.5018  | 89.5114  | 95.3458  |
| 107.2532 | 114.9816 | 124.1991 |
| 140.1067 | 144.7430 | 150.3807 |
| 158.9874 | 173.1596 | 179.6331 |
| 181.8902 | 197.8413 | 214.3713 |
| 219.4475 | 229.4908 | 241.7171 |

|           |           |           |
|-----------|-----------|-----------|
| 247.6219  | 255.0098  | 256.3361  |
| 265.6747  | 268.0699  | 275.3744  |
| 283.6748  | 294.4301  | 309.8842  |
| 319.8167  | 328.3827  | 342.6181  |
| 346.2122  | 355.9565  | 366.7022  |
| 376.0925  | 381.2606  | 389.0517  |
| 404.1475  | 416.5077  | 417.1238  |
| 421.1475  | 424.4227  | 428.3952  |
| 444.9347  | 450.6810  | 462.1731  |
| 467.4170  | 489.0232  | 492.8398  |
| 498.0567  | 505.6484  | 519.5233  |
| 533.2905  | 539.8299  | 546.4705  |
| 557.6996  | 560.6069  | 576.5591  |
| 583.1916  | 585.8806  | 593.7610  |
| 606.6640  | 616.4309  | 625.0119  |
| 629.6420  | 633.9935  | 641.6306  |
| 643.1837  | 644.5409  | 654.8397  |
| 666.2195  | 688.2665  | 698.5238  |
| 708.1678  | 714.3074  | 719.4858  |
| 720.8769  | 722.5087  | 728.3812  |
| 730.6104  | 754.6684  | 763.2940  |
| 771.1417  | 775.3137  | 784.0348  |
| 785.7794  | 792.4869  | 802.6153  |
| 809.9421  | 818.1458  | 829.7479  |
| 832.7774  | 843.6090  | 850.1106  |
| 854.3111  | 856.6660  | 864.6630  |
| 869.0989  | 875.7254  | 877.5880  |
| 879.4141  | 888.4753  | 901.7702  |
| 915.5501  | 920.8368  | 944.1711  |
| 956.0916  | 964.4575  | 970.8043  |
| 984.2314  | 987.6597  | 988.3842  |
| 994.1574  | 1002.1152 | 1003.7927 |
| 1009.8458 | 1010.1087 | 1016.0938 |
| 1016.4781 | 1018.6520 | 1022.5468 |
| 1026.1044 | 1028.3660 | 1031.7945 |
| 1034.5127 | 1034.7347 | 1047.8561 |
| 1054.2265 | 1067.2297 | 1069.4726 |
| 1071.3717 | 1073.1923 | 1079.4904 |
| 1086.7123 | 1099.0829 | 1103.4388 |
| 1114.7492 | 1119.8258 | 1120.4170 |
| 1122.2348 | 1133.4974 | 1136.7412 |
| 1140.4429 | 1146.0832 | 1151.2393 |
| 1162.4102 | 1163.6498 | 1170.6009 |
| 1179.7717 | 1181.4588 | 1183.3284 |

|           |           |           |
|-----------|-----------|-----------|
| 1188.6190 | 1189.3741 | 1196.8517 |
| 1201.7718 | 1205.2379 | 1209.6843 |
| 1211.0897 | 1212.8912 | 1214.1983 |
| 1220.3561 | 1222.5765 | 1241.4681 |
| 1249.5898 | 1250.9129 | 1252.9787 |
| 1265.3941 | 1282.8183 | 1289.2206 |
| 1303.4690 | 1306.8362 | 1320.6897 |
| 1325.7966 | 1327.8734 | 1329.5520 |
| 1332.5499 | 1340.3225 | 1341.3426 |
| 1346.2967 | 1357.4888 | 1358.8946 |
| 1360.6431 | 1360.9853 | 1367.4337 |
| 1370.7376 | 1372.9810 | 1375.7676 |
| 1378.4031 | 1384.9306 | 1420.0683 |
| 1427.2642 | 1453.0954 | 1454.1244 |
| 1459.2028 | 1460.6003 | 1471.0621 |
| 1492.1988 | 1494.5720 | 1497.7281 |
| 1499.8003 | 1500.5814 | 1503.2824 |
| 1506.7444 | 1507.7228 | 1508.6688 |
| 1520.0299 | 1523.9792 | 1537.9779 |
| 1541.4532 | 1548.2206 | 1550.1789 |
| 1550.6461 | 1564.4202 | 1594.3791 |
| 1629.2027 | 1639.3696 | 1671.0376 |
| 1671.3287 | 1672.0740 | 1676.8912 |
| 1681.3258 | 1686.3082 | 1688.8286 |
| 1691.2836 | 1695.3272 | 1698.3175 |
| 1703.2607 | 1725.1382 | 3070.9893 |
| 3077.7062 | 3079.7345 | 3093.8582 |
| 3125.1841 | 3139.5822 | 3151.2908 |
| 3154.1450 | 3158.8185 | 3160.0719 |
| 3165.2712 | 3174.4567 | 3178.0611 |
| 3188.4660 | 3190.0117 | 3192.0250 |
| 3200.6284 | 3205.7394 | 3205.8004 |
| 3206.4478 | 3206.8422 | 3210.5393 |
| 3212.6765 | 3215.4236 | 3216.1853 |
| 3221.6228 | 3222.4437 | 3224.9890 |
| 3225.4164 | 3225.7306 | 3227.3751 |
| 3228.9663 | 3230.0201 | 3231.3016 |
| 3231.9349 | 3235.0456 | 3236.4917 |
| 3242.6809 | 3247.5895 | 3250.0475 |

## **<sup>2</sup>TS5S**

Zero-point correction=0.779100

Thermal correction to Energy=0.826101

Thermal correction to Enthalpy=0.827045  
 Thermal correction to Gibbs Free Energy=0.697269  
 Sum of electronic and zero-point Energies=-3207.945324  
 Sum of electronic and thermal Energies=-3207.898324  
 Sum of electronic and thermal Enthalpies=-3207.897380  
 Sum of electronic and thermal Free Energies=-3208.027155

Cartesian coordinate

|   |             |             |             |
|---|-------------|-------------|-------------|
| N | 0.45301200  | 0.52223100  | -2.20552900 |
| N | 1.27735900  | 1.45998300  | -1.60371000 |
| C | 2.56696400  | 1.71383100  | -2.25288400 |
| C | 0.93686800  | -0.73537300 | -2.53217400 |
| C | 0.11235300  | -1.70353200 | -2.97837500 |
| C | -1.33108600 | -1.51224500 | -2.93097600 |
| C | -1.73338300 | -0.11422600 | -2.84826400 |
| C | -0.88286900 | 0.85536500  | -2.42929500 |
| C | -2.03159200 | -2.41201200 | -1.41552000 |
| C | -1.23287500 | -1.98980900 | -0.32581400 |
| C | -0.11889900 | -2.73157700 | 0.11822600  |
| O | 0.29236200  | -3.82040600 | -0.32104800 |
| S | 1.33876100  | 1.31433900  | 0.09964300  |
| O | 0.01209500  | 0.84389100  | 0.47921000  |
| C | 1.55510000  | 2.99510800  | 0.58454300  |
| O | 2.51199700  | 0.54406700  | 0.51387400  |
| C | 2.78678000  | 3.41535800  | 1.07629400  |
| C | 2.93298800  | 4.74888800  | 1.44266400  |
| C | 1.87150400  | 5.65023900  | 1.31928400  |
| C | 0.64654800  | 5.19102700  | 0.81620600  |
| C | 0.47404400  | 3.86555600  | 0.44764500  |
| C | 2.02706000  | 7.08597700  | 1.74091500  |
| H | 2.37426600  | 1.88373600  | -3.31296600 |
| H | 2.98384700  | 2.62564800  | -1.81928600 |
| H | 3.28066700  | 0.89245700  | -2.12594400 |
| H | 0.53180200  | -2.65704800 | -3.27415800 |
| H | -2.75600600 | 0.16457100  | -3.07490000 |
| H | -1.83724300 | -3.44101000 | -1.72342100 |
| H | 3.60527300  | 2.70942400  | 1.17017900  |
| H | 3.88600100  | 5.09606100  | 1.82964500  |
| H | -0.18264400 | 5.88455100  | 0.71002200  |
| H | -0.47754000 | 3.50955200  | 0.06285100  |
| H | 3.07808900  | 7.37641600  | 1.78496000  |
| H | 1.50826600  | 7.75643100  | 1.05195700  |
| H | 1.59459600  | 7.23765800  | 2.73494900  |
| C | -3.47657700 | -2.02904900 | -1.44083300 |

|   |             |             |             |
|---|-------------|-------------|-------------|
| C | -4.31989800 | -2.59985100 | -2.40014700 |
| C | -4.01344000 | -1.08529500 | -0.55624100 |
| C | -5.65842100 | -2.23046300 | -2.48477900 |
| H | -3.92317300 | -3.34758800 | -3.08317600 |
| C | -5.35285800 | -0.71531100 | -0.63997200 |
| H | -3.39608400 | -0.64740500 | 0.22342700  |
| C | -6.17910000 | -1.28186300 | -1.60706400 |
| H | -6.29700900 | -2.68734600 | -3.23375700 |
| H | -5.75214900 | 0.00951700  | 0.06294400  |
| H | -7.22356900 | -0.99547500 | -1.66935800 |
| H | -1.39535300 | -1.01212900 | 0.11284400  |
| C | 4.34163700  | -1.83342700 | -0.75476100 |
| C | 3.27995800  | -2.74055100 | -0.64279500 |
| C | 2.77760100  | -3.38656300 | -1.76980500 |
| C | 3.29973400  | -3.05523200 | -3.02011800 |
| C | 4.30619300  | -2.09539400 | -3.14031100 |
| C | 4.84304400  | -1.48696400 | -2.00524600 |
| C | 4.88238900  | -1.46639200 | 0.60007000  |
| C | 4.38498300  | -2.65928000 | 1.44350400  |
| C | 3.01524500  | -3.04970500 | 0.81611900  |
| H | 1.99979300  | -4.13366200 | -1.67059400 |
| H | 2.92832000  | -3.55709500 | -3.90793700 |
| H | 4.70198500  | -1.85061200 | -4.12087900 |
| H | 5.67160400  | -0.79027500 | -2.09223800 |
| H | 4.45319500  | -0.51906300 | 0.93881000  |
| H | 5.04788100  | -3.51057800 | 1.27116100  |
| H | 5.97087700  | -1.38308100 | 0.62143600  |
| H | 2.74145700  | -4.09067200 | 0.99252100  |
| N | 1.96301600  | -2.23159300 | 1.50524900  |
| O | 4.36111400  | -2.48134400 | 2.83835100  |
| C | 0.63802400  | -2.13971000 | 1.27499400  |
| C | 2.19896300  | -1.52892100 | 2.66013900  |
| N | 0.13696000  | -1.43216300 | 2.28923100  |
| N | 1.10152800  | -1.03118600 | 3.15258900  |
| C | 3.56279100  | -1.40172700 | 3.25665000  |
| H | 3.99334300  | -0.43171000 | 2.97720400  |
| H | 3.48390000  | -1.44738900 | 4.34345100  |
| C | -1.23965400 | -1.16248900 | 2.59581800  |
| C | -1.63696500 | 0.14944300  | 2.82017300  |
| C | -2.13561600 | -2.22560000 | 2.66498000  |
| C | -2.97518300 | 0.40604900  | 3.09916400  |
| C | -3.47353200 | -1.96631000 | 2.93179700  |
| C | -3.88024600 | -0.65080700 | 3.14208900  |
| H | -3.31636700 | 1.41954900  | 3.27449200  |

|    |             |             |             |
|----|-------------|-------------|-------------|
| H  | -4.19365900 | -2.77436000 | 2.98082200  |
| H  | -1.79459300 | -3.24357500 | 2.50754100  |
| H  | -0.91394500 | 0.95253600  | 2.74863800  |
| Cl | -5.55615300 | -0.32121300 | 3.46089000  |
| H  | -1.90608900 | -2.10876000 | -3.63859100 |
| H  | 2.01116700  | -0.85892300 | -2.44769000 |
| C  | -1.32297300 | 2.25349400  | -2.21340600 |
| C  | -0.64373300 | 3.34217100  | -2.77186300 |
| C  | -2.46912400 | 2.47961700  | -1.44594100 |
| C  | -1.10389900 | 4.63610800  | -2.56166000 |
| H  | 0.24068600  | 3.17242500  | -3.37788000 |
| C  | -2.92680700 | 3.77839200  | -1.23369100 |
| H  | -2.98751000 | 1.63202900  | -1.00593900 |
| C  | -2.24378700 | 4.85757900  | -1.78830900 |
| H  | -0.57522300 | 5.47383100  | -3.00409800 |
| H  | -3.81614800 | 3.94568300  | -0.63503800 |
| H  | -2.60151900 | 5.86914200  | -1.62551900 |

#### Variable frequencies

|           |          |          |
|-----------|----------|----------|
| -360.7437 | 17.0944  | 20.7354  |
| 24.2228   | 30.5066  | 34.5424  |
| 36.5961   | 39.5177  | 53.2945  |
| 56.7190   | 57.3145  | 67.6538  |
| 70.8310   | 72.6803  | 73.3672  |
| 81.0179   | 85.7898  | 90.6030  |
| 94.2696   | 99.6835  | 105.3033 |
| 111.5975  | 117.5227 | 133.3574 |
| 147.6946  | 155.0893 | 155.3976 |
| 170.7933  | 179.8274 | 191.7274 |
| 204.1394  | 207.1567 | 213.2088 |
| 220.5254  | 225.7710 | 230.7603 |
| 245.8054  | 255.8588 | 265.1226 |
| 267.9120  | 285.9159 | 287.5777 |
| 297.5022  | 308.6103 | 311.1846 |
| 315.8063  | 327.3916 | 348.7429 |
| 351.0266  | 356.8628 | 360.8496 |
| 382.6552  | 386.5365 | 390.4523 |
| 407.7425  | 415.4654 | 417.1002 |
| 420.3667  | 426.3741 | 434.5388 |
| 447.3645  | 452.4886 | 456.7620 |
| 462.0817  | 479.0733 | 488.7984 |
| 491.0128  | 503.1773 | 514.1033 |
| 526.1186  | 533.5382 | 544.3987 |
| 554.4770  | 558.9342 | 570.1191 |

|           |           |           |
|-----------|-----------|-----------|
| 574.2914  | 588.4745  | 593.8999  |
| 603.1392  | 607.3884  | 621.1276  |
| 627.9110  | 630.7161  | 634.9919  |
| 642.7446  | 643.1774  | 654.2600  |
| 661.9203  | 673.7401  | 682.0331  |
| 703.1910  | 711.9273  | 716.1732  |
| 720.2083  | 722.6951  | 724.6889  |
| 732.6648  | 753.6985  | 762.8484  |
| 764.6158  | 775.7157  | 780.8132  |
| 786.5102  | 787.6773  | 792.5103  |
| 809.8857  | 827.6872  | 840.0440  |
| 840.8648  | 846.9065  | 848.3998  |
| 851.4717  | 860.8766  | 869.6496  |
| 876.2420  | 876.8933  | 881.0040  |
| 883.6387  | 891.0387  | 899.6612  |
| 908.9155  | 914.6578  | 945.7512  |
| 952.7731  | 959.8575  | 964.2474  |
| 979.1622  | 988.7833  | 988.8883  |
| 994.0348  | 1000.7224 | 1004.6217 |
| 1006.3284 | 1009.0052 | 1015.0869 |
| 1016.3429 | 1019.6865 | 1025.5304 |
| 1025.8872 | 1027.3965 | 1030.8542 |
| 1033.8338 | 1038.8567 | 1040.9291 |
| 1055.5083 | 1060.6289 | 1068.0342 |
| 1069.4965 | 1070.5351 | 1073.9446 |
| 1078.3880 | 1090.2476 | 1098.0940 |
| 1114.5574 | 1118.8867 | 1120.0614 |
| 1122.2697 | 1128.3030 | 1132.8382 |
| 1135.5621 | 1144.3490 | 1146.7845 |
| 1154.2064 | 1158.9253 | 1163.8732 |
| 1167.8746 | 1173.7409 | 1175.2671 |
| 1180.8126 | 1182.0749 | 1182.9798 |
| 1199.5006 | 1205.7247 | 1206.2066 |
| 1207.7149 | 1212.1616 | 1213.0536 |
| 1218.9296 | 1227.0431 | 1238.3086 |
| 1251.5440 | 1255.9457 | 1263.8930 |
| 1280.4353 | 1286.8812 | 1289.7531 |
| 1300.1504 | 1312.7332 | 1316.9365 |
| 1319.5991 | 1321.0849 | 1325.9809 |
| 1330.6746 | 1338.3251 | 1338.6069 |
| 1341.3212 | 1342.9246 | 1353.4784 |
| 1358.0525 | 1359.5196 | 1362.5799 |
| 1363.7693 | 1364.5112 | 1370.2994 |
| 1378.2404 | 1382.9060 | 1423.0071 |



|           |           |           |
|-----------|-----------|-----------|
| 1427.8430 | 1446.3413 | 1448.3022 |
| 1457.3900 | 1459.7226 | 1460.7051 |
| 1480.8790 | 1488.8290 | 1496.6009 |
| 1500.2450 | 1500.3497 | 1502.0018 |
| 1504.7546 | 1506.3535 | 1514.6078 |
| 1519.9342 | 1525.0824 | 1534.5338 |
| 1537.7212 | 1546.8328 | 1548.8458 |
| 1549.3837 | 1580.2585 | 1590.8883 |
| 1635.7745 | 1643.9210 | 1668.0660 |
| 1670.2089 | 1671.7960 | 1672.6479 |
| 1674.0225 | 1681.6235 | 1684.9025 |
| 1689.8320 | 1693.5746 | 1695.8787 |
| 1701.4710 | 1715.1667 | 3067.5384 |
| 3080.4069 | 3089.6334 | 3111.5333 |
| 3143.5022 | 3151.3954 | 3152.5393 |
| 3156.3367 | 3160.1469 | 3162.8034 |
| 3165.4035 | 3177.5126 | 3179.7909 |
| 3190.0527 | 3196.4349 | 3198.1612 |
| 3201.4621 | 3201.9236 | 3206.5205 |
| 3207.0586 | 3210.5185 | 3212.6120 |
| 3214.8325 | 3221.3802 | 3222.3693 |
| 3223.1488 | 3223.8811 | 3225.6903 |
| 3230.8879 | 3236.1610 | 3237.9094 |
| 3238.2959 | 3242.2949 | 3244.2762 |
| 3246.9070 | 3247.4307 | 3261.0410 |
| 3261.4519 | 3262.4996 | 3266.0855 |

## <sup>2</sup>TS5S<sup>b</sup>

Zero-point correction=0.778753

Thermal correction to Energy=0.826326

Thermal correction to Enthalpy=0.827270

Thermal correction to Gibbs Free Energy=0.693221

Sum of electronic and zero-point Energies=-3207.922800

Sum of electronic and thermal Energies=-3207.875227

Sum of electronic and thermal Enthalpies=-3207.874283

Sum of electronic and thermal Free Energies=-3208.008332

### Cartesian coordinate

|   |            |             |             |
|---|------------|-------------|-------------|
| C | 6.97669000 | -3.03323100 | -0.14514800 |
| C | 5.79129200 | -2.32978000 | 0.04421100  |
| C | 4.59090800 | -2.75864300 | -0.51264100 |
| C | 4.59258900 | -3.92572000 | -1.27092900 |
| C | 5.77741100 | -4.64218800 | -1.45965200 |

|    |             |             |             |
|----|-------------|-------------|-------------|
| C  | 6.97466900  | -4.20341700 | -0.90020200 |
| C  | 8.12995100  | -2.36548600 | 0.55857400  |
| C  | 7.58427200  | -0.99993200 | 1.03896400  |
| C  | 6.01877700  | -1.10676500 | 0.90151300  |
| H  | 3.67346600  | -2.19202400 | -0.36503700 |
| H  | 3.67093700  | -4.28319100 | -1.71765500 |
| H  | 5.76407500  | -5.54988700 | -2.05373600 |
| H  | 7.89289800  | -4.76121400 | -1.05601800 |
| H  | 9.00194400  | -2.21271700 | -0.08509700 |
| H  | 7.84846300  | -0.80099300 | 2.07721200  |
| H  | 8.46354800  | -2.96080000 | 1.41414700  |
| H  | 5.52612200  | -1.16785000 | 1.87265700  |
| N  | 5.48646000  | 0.09208600  | 0.23656800  |
| O  | 8.14050200  | 0.09422100  | 0.32662800  |
| C  | 4.27384800  | 0.66227300  | 0.30639200  |
| C  | 6.18426800  | 0.73278300  | -0.74731200 |
| N  | 4.29694000  | 1.64541900  | -0.60413800 |
| N  | 5.48237800  | 1.69552300  | -1.27324600 |
| C  | 7.60123900  | 0.30897900  | -0.96097300 |
| H  | 7.64414700  | -0.59288400 | -1.58741700 |
| H  | 8.16776600  | 1.10711200  | -1.44002200 |
| C  | 0.79385300  | 0.55701800  | 1.79191500  |
| C  | 1.86378000  | 0.52620600  | 0.85961600  |
| C  | 3.18197700  | 0.26226700  | 1.27071500  |
| O  | 3.55305100  | -0.20311700 | 2.36395600  |
| H  | 1.66833000  | 0.78512100  | -0.17596300 |
| C  | 3.26482300  | 2.59681100  | -0.91456600 |
| C  | 2.68253300  | 3.34289800  | 0.10597900  |
| C  | 2.84305200  | 2.70110600  | -2.23379900 |
| C  | 1.61601500  | 4.17957800  | -0.19574600 |
| H  | 3.03976600  | 3.25614400  | 1.12663400  |
| C  | 1.79070000  | 3.55706400  | -2.53839100 |
| H  | 3.32596000  | 2.11468900  | -3.00766400 |
| C  | 1.17767400  | 4.27427700  | -1.51469900 |
| H  | 1.12081000  | 4.74570800  | 0.58488700  |
| H  | 1.43746300  | 3.65581900  | -3.55791100 |
| Cl | -0.15922900 | 5.31541900  | -1.89197800 |
| S  | -3.74441800 | -1.15089400 | -1.56353900 |
| O  | -3.27282400 | -1.85179400 | -2.75210800 |
| O  | -3.16764700 | 0.12771600  | -1.18123800 |
| N  | -3.50992900 | -2.15893400 | -0.18727100 |
| N  | -2.35251200 | -1.86133700 | 0.51408100  |
| C  | -6.20135200 | -1.67249800 | -2.63060800 |
| H  | -5.66128800 | -2.19086300 | -3.41589400 |

|   |              |             |             |
|---|--------------|-------------|-------------|
| C | -7.59124200  | -1.59476100 | -2.63040200 |
| H | -8.15228800  | -2.06455800 | -3.43223600 |
| C | -5.50507700  | -1.06081200 | -1.59526300 |
| C | -6.15257800  | -0.37597300 | -0.56598900 |
| H | -5.58298800  | 0.09864600  | 0.22870600  |
| C | -8.27389700  | -0.92223300 | -1.61431000 |
| C | -7.53678100  | -0.31679800 | -0.58602900 |
| H | -8.05768700  | 0.20714500  | 0.21060900  |
| C | -9.77642200  | -0.83684300 | -1.61373000 |
| H | -10.18664600 | -1.23313700 | -0.68068700 |
| H | -10.20819100 | -1.39715200 | -2.44450000 |
| H | -10.10228400 | 0.20395600  | -1.69745900 |
| C | -1.11789600  | -2.16867500 | -0.02206300 |
| H | -1.14784300  | -2.66763300 | -0.98448700 |
| C | -2.44734900  | -1.20456400 | 1.73123200  |
| C | -1.31127200  | -0.96210600 | 2.44374200  |
| H | -1.42663600  | -0.49770600 | 3.41732400  |
| C | 0.02582800   | -1.87608300 | 0.62869900  |
| H | 0.96944200   | -2.15296000 | 0.17221300  |
| C | 0.01777700   | -1.18596200 | 1.91196200  |
| C | -3.73835800  | -3.58702300 | -0.42977100 |
| H | -4.74044200  | -3.69914900 | -0.84892300 |
| H | -3.01142600  | -4.02412500 | -1.12172000 |
| H | -3.69761700  | -4.09987400 | 0.53194800  |
| C | -3.78088700  | -0.75527200 | 2.19793500  |
| C | -4.84466800  | -1.63786000 | 2.40877400  |
| C | -3.95715100  | 0.61305000  | 2.42252300  |
| C | -6.07369900  | -1.15450700 | 2.84101600  |
| H | -4.70802100  | -2.70139500 | 2.24051000  |
| C | -5.19464100  | 1.09420000  | 2.84659300  |
| H | -3.13034900  | 1.29480300  | 2.24001900  |
| C | -6.25193400  | 0.21285100  | 3.05568200  |
| H | -6.89421600  | -1.84419700 | 3.00867800  |
| H | -5.32874700  | 2.15856800  | 3.00957300  |
| H | -7.21387700  | 0.58776100  | 3.39039300  |
| H | 1.14490800   | 0.60592600  | 2.82377500  |
| C | -0.27388400  | 1.55511600  | 1.49299800  |
| C | -0.56000400  | 2.53752700  | 2.44575400  |
| C | -0.94619800  | 1.57805300  | 0.26808000  |
| C | -1.47100200  | 3.55371900  | 2.16304200  |
| H | -0.04938900  | 2.51709700  | 3.40515200  |
| C | -1.86597900  | 2.58471900  | -0.00955500 |
| H | -0.76722400  | 0.79999500  | -0.47048600 |
| C | -2.11838400  | 3.58418000  | 0.92982600  |

|   |             |             |             |
|---|-------------|-------------|-------------|
| H | -1.67129100 | 4.31946100  | 2.90588800  |
| H | -2.39112800 | 2.57646500  | -0.95822000 |
| H | -2.82433500 | 4.37672800  | 0.70378800  |
| H | 0.78382900  | -1.51544600 | 2.61367100  |

Variable frequencies

|           |          |          |
|-----------|----------|----------|
| -220.0149 | 13.3091  | 14.6606  |
| 19.9645   | 23.8723  | 25.9563  |
| 29.4110   | 37.4391  | 42.6935  |
| 50.3028   | 56.6169  | 58.2194  |
| 61.0445   | 63.8886  | 66.5380  |
| 76.5784   | 80.4550  | 82.0932  |
| 89.6350   | 93.9383  | 97.6741  |
| 98.9127   | 109.0679 | 116.0073 |
| 127.7124  | 131.9229 | 145.5512 |
| 155.5233  | 164.8173 | 177.2585 |
| 183.6729  | 199.5544 | 202.5552 |
| 213.1860  | 222.1558 | 230.2014 |
| 236.2437  | 249.3670 | 255.8521 |
| 258.2243  | 275.6720 | 286.3887 |
| 289.2732  | 305.4621 | 311.3531 |
| 314.8279  | 327.0509 | 344.0127 |
| 351.8009  | 353.0297 | 367.4287 |
| 377.4367  | 382.4127 | 387.7810 |
| 415.2000  | 417.9956 | 421.7878 |
| 423.6775  | 428.4821 | 432.9400 |
| 435.1119  | 441.8172 | 447.1191 |
| 476.0672  | 486.2882 | 490.8349 |
| 500.1184  | 511.6014 | 519.9335 |
| 522.7667  | 534.5656 | 542.8800 |
| 557.7237  | 558.3579 | 571.5540 |
| 574.1642  | 584.9371 | 595.2567 |
| 611.7582  | 617.1457 | 618.5573 |
| 629.7947  | 636.3054 | 640.0659 |
| 642.2802  | 648.8795 | 669.8432 |
| 674.0639  | 691.8753 | 706.4691 |
| 712.8658  | 718.5586 | 720.4543 |
| 722.5211  | 724.3155 | 728.7926 |
| 732.7582  | 755.9237 | 756.8472 |
| 769.1582  | 772.4299 | 784.9625 |
| 788.3288  | 794.8326 | 800.3328 |
| 818.8300  | 829.5585 | 837.6347 |
| 846.8756  | 847.4906 | 851.8215 |
| 855.9130  | 863.6571 | 876.2285 |

|           |           |           |
|-----------|-----------|-----------|
| 879.7044  | 879.9618  | 881.6801  |
| 883.7929  | 888.3468  | 895.8319  |
| 904.7885  | 918.3598  | 951.3349  |
| 955.2623  | 958.5547  | 962.8696  |
| 975.5534  | 981.6276  | 987.4589  |
| 997.6594  | 1003.9767 | 1006.7385 |
| 1011.2383 | 1011.8919 | 1014.2533 |
| 1015.4534 | 1016.5984 | 1023.9729 |
| 1027.0766 | 1027.6694 | 1029.1077 |
| 1032.4178 | 1034.3525 | 1046.4549 |
| 1054.4235 | 1059.3188 | 1065.4257 |
| 1067.4904 | 1068.4794 | 1070.9313 |
| 1075.9543 | 1085.7066 | 1109.0884 |
| 1115.8780 | 1120.2770 | 1121.1192 |
| 1123.9704 | 1130.6634 | 1133.9801 |
| 1141.1220 | 1145.0163 | 1150.3586 |
| 1154.3132 | 1156.5994 | 1166.2210 |
| 1171.0922 | 1179.9637 | 1183.1141 |
| 1183.5326 | 1184.9284 | 1185.9737 |
| 1200.9709 | 1203.5584 | 1205.0734 |
| 1208.0927 | 1212.7739 | 1219.3808 |
| 1226.2918 | 1232.6350 | 1242.5537 |
| 1249.9578 | 1253.8715 | 1262.0394 |
| 1273.8402 | 1281.5656 | 1291.3443 |
| 1311.7290 | 1312.5291 | 1314.2609 |
| 1315.8100 | 1321.6785 | 1322.4947 |
| 1331.4930 | 1332.8350 | 1339.7464 |
| 1343.6778 | 1350.4513 | 1356.3321 |
| 1356.9403 | 1359.4694 | 1366.1643 |
| 1370.4131 | 1375.7095 | 1377.0127 |
| 1380.6360 | 1382.3425 | 1424.3835 |
| 1425.9384 | 1456.1546 | 1456.3435 |
| 1460.2393 | 1461.8963 | 1474.2541 |
| 1484.0980 | 1489.4080 | 1494.4271 |
| 1498.1467 | 1498.6866 | 1499.5626 |
| 1502.4128 | 1507.0764 | 1512.3575 |
| 1522.0384 | 1529.5295 | 1534.9403 |
| 1542.8778 | 1544.2833 | 1545.9759 |
| 1549.1432 | 1562.9543 | 1570.8805 |
| 1626.8573 | 1658.2721 | 1665.7357 |
| 1671.1667 | 1674.7107 | 1676.4554 |
| 1685.7094 | 1687.3524 | 1690.7602 |
| 1691.1185 | 1692.3272 | 1695.5502 |
| 1700.9001 | 1721.5723 | 3069.5754 |

|           |           |           |
|-----------|-----------|-----------|
| 3076.4864 | 3079.0564 | 3092.6646 |
| 3137.8191 | 3138.9146 | 3148.5736 |
| 3153.5699 | 3165.5994 | 3171.5221 |
| 3172.1247 | 3180.7423 | 3189.5319 |
| 3189.9586 | 3190.5687 | 3190.8985 |
| 3206.6031 | 3208.2033 | 3208.4607 |
| 3211.1581 | 3214.1850 | 3221.4746 |
| 3221.8460 | 3222.3431 | 3223.4369 |
| 3224.2866 | 3225.2088 | 3225.6508 |
| 3226.7256 | 3230.2178 | 3233.1457 |
| 3233.3672 | 3233.5316 | 3236.0383 |
| 3240.8008 | 3241.1244 | 3242.8256 |
| 3244.7190 | 3251.3143 | 3252.4563 |

## <sup>2</sup>TS5S<sup>c</sup>

Zero-point correction=0.778770

Thermal correction to Energy=0.826288

Thermal correction to Enthalpy=0.827232

Thermal correction to Gibbs Free Energy=0.693787

Sum of electronic and zero-point Energies=-3207.929743

Sum of electronic and thermal Energies=-3207.882225

Sum of electronic and thermal Enthalpies=-3207.881281

Sum of electronic and thermal Free Energies=-3208.014725

### Cartesian coordinate

|   |             |             |             |
|---|-------------|-------------|-------------|
| N | 2.90920200  | 0.56982500  | 1.96511400  |
| N | 4.12265000  | 0.60940400  | 1.28512400  |
| C | 5.28518800  | 0.99735600  | 2.08795300  |
| C | 2.40787500  | 1.72647900  | 2.53569500  |
| C | 1.10358000  | 1.83593700  | 2.85904800  |
| C | 0.16399000  | 0.79960700  | 2.45839300  |
| C | 0.78278000  | -0.46411000 | 2.11252200  |
| C | 2.09826700  | -0.54447300 | 1.77853200  |
| C | -0.58025800 | 1.38399400  | 0.79650800  |
| C | -1.75986400 | 0.63097000  | 0.54756400  |
| C | -1.79515500 | -0.48330200 | -0.30214200 |
| O | -0.85344300 | -1.14097700 | -0.78711100 |
| S | 3.96006100  | 1.46099800  | -0.20803700 |
| O | 2.63199900  | 1.09664900  | -0.68494600 |
| C | 5.22589900  | 0.67195900  | -1.15063900 |
| O | 4.30120100  | 2.86613300  | -0.02049500 |
| C | 6.23858400  | 1.45100200  | -1.69908800 |
| C | 7.21699500  | 0.82201000  | -2.46161700 |

|   |             |             |             |
|---|-------------|-------------|-------------|
| C | 7.19254100  | -0.56025000 | -2.66702700 |
| C | 6.15781400  | -1.31292200 | -2.09553600 |
| C | 5.16702900  | -0.70901900 | -1.33611600 |
| C | 8.27318900  | -1.23704000 | -3.46641200 |
| H | 5.33557500  | 0.32760000  | 2.94694800  |
| H | 6.17463200  | 0.85080600  | 1.47189200  |
| H | 5.25386400  | 2.03948200  | 2.42113200  |
| H | 0.75000600  | 2.74250800  | 3.33425900  |
| H | 0.16688400  | -1.34892200 | 2.00077200  |
| H | 0.26455500  | 1.11219400  | 0.16124800  |
| H | 6.25019900  | 2.52250900  | -1.53071700 |
| H | 8.01209800  | 1.41408400  | -2.90450400 |
| H | 6.12809500  | -2.38759100 | -2.25053700 |
| H | 4.36476700  | -1.29294500 | -0.89393900 |
| H | 9.06302100  | -1.60456900 | -2.80330700 |
| H | 7.87818500  | -2.09418900 | -4.01600300 |
| H | 8.73013300  | -0.54724600 | -4.17842400 |
| C | -0.75991100 | 2.85968900  | 0.92571100  |
| C | 0.16988200  | 3.70015500  | 0.30609600  |
| C | -1.83574700 | 3.42615000  | 1.61853200  |
| C | 0.00185300  | 5.08284200  | 0.34173400  |
| H | 1.01796600  | 3.25969000  | -0.21383400 |
| C | -1.99940500 | 4.80581800  | 1.65668100  |
| H | -2.55823600 | 2.78949000  | 2.12362700  |
| C | -1.08652000 | 5.63813900  | 1.00900600  |
| H | 0.72233000  | 5.72465600  | -0.15499400 |
| H | -2.84681200 | 5.23551000  | 2.18171100  |
| H | -1.22533700 | 6.71401400  | 1.02838600  |
| H | -2.70620100 | 0.99788700  | 0.93124100  |
| C | -3.53378500 | -4.43996900 | 1.09948500  |
| C | -2.51943800 | -3.70325500 | 0.47868500  |
| C | -1.31780100 | -3.44666100 | 1.13005300  |
| C | -1.16374500 | -3.89248000 | 2.44139900  |
| C | -2.19184200 | -4.58804300 | 3.07969400  |
| C | -3.37954100 | -4.87779200 | 2.40934800  |
| C | -4.66669900 | -4.70595800 | 0.14143600  |
| C | -3.96318400 | -4.50344700 | -1.21887600 |
| C | -2.90151700 | -3.40480500 | -0.95193600 |
| H | -0.51672700 | -2.93004100 | 0.61409100  |
| H | -0.22715200 | -3.71400300 | 2.96108700  |
| H | -2.05438300 | -4.93299800 | 4.09931300  |
| H | -4.16006500 | -5.45521500 | 2.89486400  |
| H | -5.47861200 | -3.98393800 | 0.29203100  |
| H | -3.41276100 | -5.41322400 | -1.46807300 |

|    |             |             |             |
|----|-------------|-------------|-------------|
| H  | -5.09489000 | -5.70557800 | 0.23546400  |
| H  | -2.06808100 | -3.40816400 | -1.65488200 |
| N  | -3.59649600 | -2.09291800 | -1.12353100 |
| O  | -4.78353000 | -4.24350100 | -2.33347700 |
| C  | -3.16976800 | -0.85559600 | -0.80984900 |
| C  | -4.83758000 | -1.95292500 | -1.68876200 |
| N  | -4.14968000 | -0.02947600 | -1.19214700 |
| N  | -5.19870200 | -0.70234300 | -1.73204000 |
| C  | -5.62492600 | -3.12682900 | -2.18598500 |
| H  | -6.46217200 | -3.32577400 | -1.50528700 |
| H  | -6.03492900 | -2.89172100 | -3.16970500 |
| C  | -4.20652900 | 1.40714900  | -1.11938100 |
| C  | -5.30747600 | 1.98401100  | -0.49982500 |
| C  | -3.17075600 | 2.17445800  | -1.64468100 |
| C  | -5.36963800 | 3.36879400  | -0.38940300 |
| C  | -3.22348600 | 3.55582900  | -1.51278600 |
| C  | -4.32380000 | 4.13889400  | -0.88808600 |
| H  | -6.21831000 | 3.84633000  | 0.08567200  |
| H  | -2.41440100 | 4.17648600  | -1.88094000 |
| H  | -2.32539900 | 1.70149400  | -2.13288800 |
| H  | -6.10351800 | 1.35842200  | -0.11151200 |
| Cl | -4.39756700 | 5.86706800  | -0.73398800 |
| H  | -0.75747200 | 0.75257300  | 3.03306100  |
| H  | 3.13491000  | 2.50979900  | 2.71339900  |
| C  | 2.70947700  | -1.76502800 | 1.20781300  |
| C  | 3.86405400  | -2.33220200 | 1.75714800  |
| C  | 2.11835500  | -2.34068500 | 0.07989400  |
| C  | 4.41808600  | -3.47102700 | 1.18712500  |
| H  | 4.32177400  | -1.88119800 | 2.63280500  |
| C  | 2.67837100  | -3.48531600 | -0.48721000 |
| H  | 1.25007400  | -1.86107300 | -0.36585800 |
| C  | 3.82601400  | -4.04926100 | 0.06279600  |
| H  | 5.31136400  | -3.91051000 | 1.61812300  |
| H  | 2.22302900  | -3.92575900 | -1.36814600 |
| H  | 4.26232500  | -4.93798100 | -0.38152500 |

#### Variable frequencies

|           |         |         |
|-----------|---------|---------|
| -183.2942 | 11.4605 | 15.7219 |
| 23.7240   | 26.4248 | 29.7085 |
| 32.9754   | 36.7658 | 38.9878 |
| 43.0261   | 51.2732 | 53.4822 |
| 58.9505   | 68.5468 | 73.5067 |
| 75.1904   | 81.4357 | 86.6475 |
| 90.2305   | 96.3348 | 99.0128 |



|           |           |           |
|-----------|-----------|-----------|
| 108.1432  | 111.4278  | 121.5101  |
| 140.3500  | 143.2627  | 152.7561  |
| 170.4918  | 178.1489  | 179.1187  |
| 187.0768  | 192.7225  | 206.7870  |
| 212.5821  | 218.2547  | 222.1753  |
| 244.8149  | 251.0549  | 253.6549  |
| 257.0071  | 268.8601  | 279.1542  |
| 288.6005  | 307.8084  | 308.9062  |
| 312.4850  | 329.7601  | 342.5091  |
| 345.3312  | 357.2703  | 361.1011  |
| 374.2885  | 384.1608  | 387.7594  |
| 403.1696  | 415.1074  | 418.5594  |
| 420.6074  | 421.3643  | 426.2148  |
| 441.7805  | 442.7855  | 459.6299  |
| 464.5331  | 484.4925  | 497.2480  |
| 498.7329  | 499.8811  | 523.5397  |
| 530.9798  | 534.7102  | 543.6276  |
| 553.2085  | 560.9902  | 574.0821  |
| 577.6023  | 589.4928  | 594.6095  |
| 601.7196  | 607.7673  | 621.9123  |
| 629.1692  | 630.3126  | 638.9740  |
| 642.2012  | 643.6597  | 654.7375  |
| 669.3185  | 683.8833  | 684.1073  |
| 707.9656  | 716.2074  | 717.5931  |
| 721.9700  | 725.8758  | 728.1087  |
| 730.7631  | 760.3762  | 763.7337  |
| 770.1561  | 780.0514  | 781.2653  |
| 784.2791  | 788.2073  | 793.5763  |
| 812.9639  | 826.5773  | 838.3789  |
| 840.2547  | 843.4062  | 843.8683  |
| 847.0055  | 855.5988  | 860.0215  |
| 862.0311  | 871.4904  | 872.8192  |
| 885.4870  | 892.0650  | 900.9572  |
| 913.4331  | 918.4691  | 948.0801  |
| 966.3556  | 968.6243  | 976.5205  |
| 985.0709  | 989.1084  | 989.7303  |
| 990.7332  | 995.4057  | 1007.4987 |
| 1009.0034 | 1012.8590 | 1014.5736 |
| 1016.7752 | 1017.6646 | 1024.5920 |
| 1026.4086 | 1031.1900 | 1033.1477 |
| 1034.1784 | 1038.3159 | 1045.1958 |
| 1054.1997 | 1066.7045 | 1067.1891 |
| 1073.8283 | 1074.5501 | 1076.2790 |
| 1087.8698 | 1097.2307 | 1113.6913 |

|           |           |           |
|-----------|-----------|-----------|
| 1116.7862 | 1118.8790 | 1125.6431 |
| 1128.6467 | 1131.3994 | 1134.2779 |
| 1141.3347 | 1143.5168 | 1150.7541 |
| 1155.8963 | 1159.8451 | 1167.8001 |
| 1172.6387 | 1175.8577 | 1181.0938 |
| 1183.3460 | 1186.7980 | 1194.4093 |
| 1203.1935 | 1204.4617 | 1206.5886 |
| 1208.3798 | 1210.0396 | 1215.0185 |
| 1217.7562 | 1234.7630 | 1237.5875 |
| 1249.7161 | 1253.8690 | 1265.8017 |
| 1271.7775 | 1278.3314 | 1292.5688 |
| 1298.8580 | 1302.2035 | 1313.5721 |
| 1322.4284 | 1324.1606 | 1324.8204 |
| 1330.1613 | 1337.0369 | 1344.0630 |
| 1346.6809 | 1354.6999 | 1354.7492 |
| 1355.9351 | 1362.8111 | 1367.6555 |
| 1370.1914 | 1371.8640 | 1375.9439 |
| 1376.9629 | 1384.9037 | 1423.5402 |
| 1424.4575 | 1451.0109 | 1453.2883 |
| 1454.4333 | 1455.4003 | 1463.3066 |
| 1485.2604 | 1498.5801 | 1499.2768 |
| 1500.4195 | 1502.5196 | 1503.5376 |
| 1507.3732 | 1508.1004 | 1512.8424 |
| 1517.0539 | 1525.0437 | 1536.1081 |
| 1542.1447 | 1544.7656 | 1548.8147 |
| 1555.2258 | 1571.8359 | 1573.6775 |
| 1627.2076 | 1652.0622 | 1669.4079 |
| 1671.2550 | 1676.0569 | 1677.0957 |
| 1679.4692 | 1683.9909 | 1686.1226 |
| 1689.9945 | 1692.7754 | 1701.7821 |
| 1709.7449 | 1724.7282 | 3073.6503 |
| 3079.3972 | 3080.0490 | 3091.0027 |
| 3145.4002 | 3146.0376 | 3159.8369 |
| 3161.5252 | 3164.9876 | 3165.4147 |
| 3171.1487 | 3176.0461 | 3184.4141 |
| 3188.3626 | 3192.7203 | 3194.6764 |
| 3199.9399 | 3203.8877 | 3205.5948 |
| 3207.5632 | 3209.1983 | 3210.1870 |
| 3212.7643 | 3215.4613 | 3215.9339 |
| 3219.1271 | 3226.7164 | 3227.2059 |
| 3227.7110 | 3229.2408 | 3231.4179 |
| 3233.5921 | 3234.6550 | 3239.4184 |
| 3241.1077 | 3242.1954 | 3244.8923 |
| 3251.8641 | 3264.9397 | 3267.9254 |

## <sup>2</sup>TS5S<sup>d</sup>

Zero-point correction=0.778494

Thermal correction to Energy=0.825801

Thermal correction to Enthalpy=0.826745

Thermal correction to Gibbs Free Energy=0.694048

Sum of electronic and zero-point Energies=-3207.930186

Sum of electronic and thermal Energies=-3207.882880

Sum of electronic and thermal Enthalpies=-3207.881936

Sum of electronic and thermal Free Energies=-3208.014633

### Cartesian coordinate

|   |             |             |             |
|---|-------------|-------------|-------------|
| C | -0.99005400 | 0.57209100  | -1.76586300 |
| C | -2.10396300 | 0.44427500  | -0.85387400 |
| C | -3.38295900 | 0.06667200  | -1.29937400 |
| O | -3.70043300 | -0.34616500 | -2.42660100 |
| H | -1.97642300 | 0.67565000  | 0.19917600  |
| S | 4.99271000  | -1.24765600 | -1.48500400 |
| O | 4.25922400  | -2.47146800 | -1.20636900 |
| O | 5.51455100  | -0.97714000 | -2.82030900 |
| N | 3.90920900  | 0.01253800  | -1.03025300 |
| N | 2.58536900  | -0.29953000 | -1.29335200 |
| C | 6.02332200  | -1.31926600 | 1.03116900  |
| H | 5.05378300  | -1.70848100 | 1.32886000  |
| C | 7.03236100  | -1.12136700 | 1.96168800  |
| H | 6.84412600  | -1.35129500 | 3.00677200  |
| C | 6.28185400  | -1.01022800 | -0.30345000 |
| C | 7.51420300  | -0.52204400 | -0.72308400 |
| H | 7.67976500  | -0.29940900 | -1.77200100 |
| C | 8.28781700  | -0.63328100 | 1.57535300  |
| C | 8.51294200  | -0.33806700 | 0.22801900  |
| H | 9.48263400  | 0.03931300  | -0.08201500 |
| C | 9.38204200  | -0.45904800 | 2.59421000  |
| H | 8.98230900  | -0.09750300 | 3.54436100  |
| H | 9.87639800  | -1.41640400 | 2.78739500  |
| H | 10.14083900 | 0.24394000  | 2.24548800  |
| C | 2.15592000  | -0.41558200 | -2.60766300 |
| H | 2.92526400  | -0.25830400 | -3.35596400 |
| C | 1.80079200  | -0.81643700 | -0.26310200 |
| C | 0.52252800  | -1.17153000 | -0.52480500 |
| H | -0.07445000 | -1.57425500 | 0.28722400  |
| C | 0.89037400  | -0.75441400 | -2.90250300 |
| H | 0.59594000  | -0.86461400 | -3.93946200 |

|   |             |             |             |
|---|-------------|-------------|-------------|
| C | -0.11538900 | -0.89175900 | -1.82624500 |
| C | 2.40172100  | -0.95375000 | 1.08627100  |
| C | 2.92704900  | 0.15598100  | 1.75654100  |
| C | 2.40993000  | -2.20373200 | 1.70720600  |
| C | 3.45187200  | 0.01352000  | 3.03605500  |
| H | 2.92135200  | 1.12614800  | 1.26735200  |
| C | 2.93836000  | -2.34389300 | 2.98960900  |
| H | 2.02870800  | -3.06571500 | 1.16888300  |
| C | 3.45974500  | -1.23704000 | 3.65434100  |
| H | 3.86052200  | 0.87735900  | 3.55017600  |
| H | 2.95211900  | -3.32038400 | 3.46236100  |
| H | 3.87493600  | -1.34760700 | 4.65091600  |
| C | -0.08387800 | 1.73432600  | -1.44414700 |
| C | 0.30888300  | 2.03758300  | -0.13501800 |
| C | 0.35195500  | 2.56073000  | -2.48258900 |
| C | 1.09531600  | 3.15615400  | 0.12707500  |
| H | 0.00631900  | 1.40104300  | 0.69259500  |
| C | 1.14318200  | 3.67782800  | -2.22324600 |
| H | 0.05960900  | 2.33060900  | -3.50382300 |
| C | 1.50836500  | 3.98531100  | -0.91531300 |
| H | 1.37239900  | 3.38991000  | 1.15082000  |
| H | 1.46298300  | 4.31261800  | -3.04322600 |
| H | 2.10607000  | 4.86642700  | -0.70551000 |
| H | -1.36227200 | 0.63891400  | -2.79283500 |
| H | -0.90625300 | -1.60291500 | -2.07829400 |
| C | -4.93052100 | -3.62137600 | 0.73313400  |
| C | -4.61061400 | -2.88283900 | -0.41081800 |
| C | -3.41827100 | -3.10055000 | -1.09684400 |
| C | -2.52229000 | -4.04012100 | -0.58927200 |
| C | -2.82542500 | -4.75587400 | 0.57019000  |
| C | -4.03644400 | -4.56153500 | 1.23213100  |
| C | -6.30465900 | -3.26896700 | 1.24286800  |
| C | -6.93737100 | -2.58666100 | 0.01037800  |
| C | -5.74724500 | -1.94538200 | -0.74956600 |
| H | -3.20383300 | -2.56489200 | -2.01515200 |
| H | -1.58872000 | -4.22839300 | -1.10982000 |
| H | -2.12004600 | -5.48907400 | 0.94725700  |
| H | -4.28300900 | -5.14519300 | 2.11349200  |
| H | -6.23421000 | -2.58610600 | 2.09808900  |
| H | -7.35280200 | -3.35291000 | -0.64722400 |
| H | -6.88441600 | -4.13535900 | 1.56700200  |
| H | -5.92628200 | -1.79830100 | -1.81488400 |
| N | -5.54906300 | -0.58908600 | -0.15407900 |
| O | -7.99632900 | -1.68676800 | 0.25106000  |

|    |             |             |             |
|----|-------------|-------------|-------------|
| C  | -4.51206400 | 0.24476700  | -0.31716600 |
| C  | -6.39911300 | 0.00813000  | 0.73847200  |
| N  | -4.75882600 | 1.29586600  | 0.46564300  |
| N  | -5.93117600 | 1.15977800  | 1.13655900  |
| C  | -7.69279300 | -0.63630900 | 1.13601600  |
| H  | -7.63651900 | -0.97117300 | 2.17900800  |
| H  | -8.49655700 | 0.09781000  | 1.05730300  |
| C  | -3.93499500 | 2.45725600  | 0.65906600  |
| C  | -3.44294800 | 3.14529500  | -0.44638300 |
| C  | -3.60932500 | 2.82310800  | 1.95911300  |
| C  | -2.56075200 | 4.19919700  | -0.24483400 |
| H  | -3.73469100 | 2.85959200  | -1.45174300 |
| C  | -2.74602800 | 3.89401200  | 2.15880100  |
| H  | -4.02113100 | 2.27578200  | 2.79981200  |
| C  | -2.21691000 | 4.55935300  | 1.05603400  |
| H  | -2.13662300 | 4.73243200  | -1.08792400 |
| H  | -2.47426900 | 4.20168800  | 3.16154500  |
| Cl | -1.10491600 | 5.86769500  | 1.30917400  |
| C  | 4.30267400  | 1.35890000  | -1.45253100 |
| H  | 5.30439100  | 1.55651700  | -1.06483400 |
| H  | 4.30771400  | 1.47873800  | -2.54154400 |
| H  | 3.59467500  | 2.06021500  | -1.00569300 |

Variable frequencies

|          |          |          |
|----------|----------|----------|
| -39.3476 | 12.0562  | 16.7741  |
| 20.0782  | 24.7164  | 27.8726  |
| 32.0485  | 37.1998  | 42.6605  |
| 47.8927  | 51.2473  | 60.5653  |
| 64.7253  | 67.8805  | 69.7347  |
| 74.0919  | 80.8126  | 88.8364  |
| 98.2490  | 101.3637 | 102.1054 |
| 112.1006 | 123.2429 | 128.1911 |
| 143.5395 | 146.7583 | 155.2495 |
| 170.9114 | 175.2697 | 184.2621 |
| 189.3948 | 191.9405 | 208.4890 |
| 216.2241 | 220.2245 | 243.1744 |
| 247.4256 | 258.0153 | 258.4772 |
| 262.0752 | 270.0580 | 281.2570 |
| 288.3852 | 302.2675 | 311.5090 |
| 324.6905 | 326.9114 | 342.5891 |
| 344.0875 | 357.3427 | 365.7007 |
| 374.5613 | 383.5851 | 387.4476 |
| 400.7447 | 414.6427 | 419.3287 |
| 420.4181 | 423.4946 | 425.8166 |

|           |           |           |
|-----------|-----------|-----------|
| 439.2968  | 448.5342  | 459.2959  |
| 468.3938  | 489.0261  | 496.1277  |
| 504.0661  | 511.1115  | 513.8007  |
| 535.4253  | 539.4063  | 546.4213  |
| 557.5549  | 559.5161  | 569.9292  |
| 581.5759  | 591.4129  | 595.0572  |
| 607.1485  | 620.7756  | 624.3043  |
| 629.3925  | 633.9025  | 641.4249  |
| 642.7641  | 644.0139  | 654.4242  |
| 662.9543  | 676.0086  | 697.8460  |
| 702.5328  | 708.6674  | 718.4241  |
| 720.1580  | 722.8875  | 726.3575  |
| 730.5985  | 750.8646  | 760.7407  |
| 767.0732  | 774.9179  | 781.1343  |
| 784.8744  | 787.1795  | 793.8174  |
| 814.0947  | 824.7290  | 834.5473  |
| 839.2491  | 841.6647  | 842.2389  |
| 847.0697  | 853.8006  | 854.2052  |
| 861.3435  | 872.2685  | 875.1435  |
| 878.4475  | 889.1073  | 900.4396  |
| 913.6610  | 922.0022  | 940.2158  |
| 948.6783  | 956.7570  | 973.1684  |
| 977.4203  | 988.8068  | 990.0650  |
| 992.8240  | 997.4899  | 1002.3388 |
| 1008.6516 | 1011.9033 | 1015.1956 |
| 1015.5582 | 1018.0817 | 1025.1469 |
| 1025.3684 | 1027.5318 | 1033.7610 |
| 1033.8548 | 1035.5465 | 1043.1375 |
| 1053.1408 | 1064.2475 | 1065.1763 |
| 1071.6181 | 1073.9312 | 1075.9360 |
| 1081.4584 | 1097.9296 | 1104.7994 |
| 1115.0252 | 1118.1383 | 1120.4121 |
| 1126.6462 | 1135.3700 | 1137.0899 |
| 1139.4666 | 1141.8035 | 1148.9736 |
| 1160.1789 | 1164.7649 | 1166.8615 |
| 1179.1167 | 1181.9250 | 1182.2143 |
| 1184.8266 | 1192.1678 | 1200.9193 |
| 1205.8647 | 1206.9380 | 1207.6169 |
| 1209.8157 | 1211.5678 | 1219.9587 |
| 1222.0848 | 1243.3934 | 1248.3588 |
| 1253.2682 | 1254.2853 | 1266.3667 |
| 1269.5285 | 1281.7423 | 1284.4037 |
| 1305.3420 | 1308.3527 | 1311.4536 |
| 1318.1217 | 1320.8193 | 1328.4406 |

|           |           |           |
|-----------|-----------|-----------|
| 1328.5870 | 1337.2147 | 1339.8312 |
| 1345.9041 | 1355.1136 | 1355.8477 |
| 1357.9558 | 1360.2608 | 1361.3970 |
| 1364.7157 | 1368.9217 | 1375.8514 |
| 1376.4450 | 1385.3143 | 1422.8042 |
| 1423.8708 | 1447.2520 | 1453.0312 |
| 1453.9863 | 1455.2631 | 1459.5408 |
| 1464.8677 | 1495.3585 | 1496.8230 |
| 1497.8319 | 1499.4270 | 1500.7211 |
| 1505.0894 | 1506.4259 | 1507.8510 |
| 1523.9461 | 1528.6132 | 1537.1819 |
| 1543.0713 | 1547.8243 | 1548.6738 |
| 1550.3091 | 1562.6897 | 1587.4758 |
| 1623.3194 | 1661.0157 | 1664.2652 |
| 1666.8045 | 1673.6114 | 1675.5031 |
| 1681.6807 | 1682.5610 | 1685.4266 |
| 1689.9510 | 1693.3085 | 1697.6231 |
| 1704.4585 | 1731.5389 | 3066.5633 |
| 3077.4146 | 3079.5925 | 3092.1119 |
| 3108.2316 | 3112.9169 | 3147.2584 |
| 3150.1237 | 3154.3546 | 3158.9992 |
| 3169.5561 | 3172.4198 | 3175.2796 |
| 3184.2532 | 3196.1836 | 3196.9843 |
| 3202.9803 | 3205.2452 | 3211.7626 |
| 3212.3370 | 3212.6311 | 3213.6867 |
| 3214.1395 | 3215.0246 | 3216.5466 |
| 3220.5144 | 3223.1279 | 3228.1532 |
| 3228.3321 | 3229.0004 | 3230.7185 |
| 3233.0197 | 3234.5265 | 3235.3191 |
| 3237.9869 | 3238.6839 | 3242.3929 |
| 3244.1177 | 3247.3946 | 3256.0167 |

## **<sup>2</sup>TS5S<sup>e</sup>**

Zero-point correction=0.779137

Thermal correction to Energy=0.826094

Thermal correction to Enthalpy=0.827038

Thermal correction to Gibbs Free Energy=0.696172

Sum of electronic and zero-point Energies=-3207.918655

Sum of electronic and thermal Energies=-3207.871697

Sum of electronic and thermal Enthalpies=-3207.870753

Sum of electronic and thermal Free Energies=-3208.001620

Cartesian coordinate

|   |             |             |             |
|---|-------------|-------------|-------------|
| N | -0.09496200 | -1.61459200 | -1.08082700 |
| N | -0.94024100 | -2.11620800 | -0.09663900 |
| C | -0.35757200 | -2.06629100 | 1.24230700  |
| C | -0.57416100 | -0.60716300 | -1.92073300 |
| C | 0.24998600  | -0.13700600 | -2.89057900 |
| C | 1.62459700  | -0.60995600 | -3.00330900 |
| C | 1.82580200  | -1.93779100 | -2.43797400 |
| C | 1.01413700  | -2.36152200 | -1.45127700 |
| C | 2.81668900  | 0.50933700  | -2.07112000 |
| C | 2.27637000  | 0.72821200  | -0.77189500 |
| C | 1.71605700  | 1.98337800  | -0.46861900 |
| O | 1.67998000  | 2.97389200  | -1.22531500 |
| S | -1.64457900 | -3.63016000 | -0.54322700 |
| O | -1.91342100 | -3.48592800 | -1.96285600 |
| C | -3.13062600 | -3.58372400 | 0.40321700  |
| O | -0.80165000 | -4.71190100 | -0.04624200 |
| C | -3.30324900 | -4.49812400 | 1.43691300  |
| C | -4.48656600 | -4.45477900 | 2.16639400  |
| C | -5.47951200 | -3.51590300 | 1.87249300  |
| C | -5.26836800 | -2.60945000 | 0.82446300  |
| C | -4.09985700 | -2.63720600 | 0.07760600  |
| C | -1.97550900 | -0.15934600 | -1.72625100 |
| C | -2.90496100 | -0.37407400 | -2.74360000 |
| C | -4.23326300 | 0.01589400  | -2.56857500 |
| C | -4.63301900 | 0.61323500  | -1.37747000 |
| C | -3.70253300 | 0.83398900  | -0.36002700 |
| C | -2.37984000 | 0.45153200  | -0.53474900 |
| C | -6.76938900 | -3.49486800 | 2.64743700  |
| H | -0.17373200 | -1.01391600 | 1.47382700  |
| H | -1.08778900 | -2.46330900 | 1.95019100  |
| H | 0.57651500  | -2.63480400 | 1.32449400  |
| H | -0.12003300 | 0.63877500  | -3.55123100 |
| H | 2.66827200  | -2.54700000 | -2.73851500 |
| H | 1.13556900  | -3.30269100 | -0.92554400 |
| H | 2.76081700  | 1.41023900  | -2.68447700 |
| H | -2.52787400 | -5.22585500 | 1.65207300  |
| H | -4.64225500 | -5.16346200 | 2.97398400  |
| H | -6.03352300 | -1.87473000 | 0.58946100  |
| H | -3.93837800 | -1.94344000 | -0.74219100 |
| H | -2.59084300 | -0.87504100 | -3.65374800 |
| H | -4.95462100 | -0.16084900 | -3.35942200 |
| H | -5.66677700 | 0.91527700  | -1.24067000 |
| H | -4.01181100 | 1.31132600  | 0.56446900  |
| H | -1.64761500 | 0.62235900  | 0.25176500  |



|   |             |             |             |
|---|-------------|-------------|-------------|
| H | -7.54174700 | -4.05653300 | 2.11249000  |
| H | -6.64863400 | -3.94961900 | 3.63239200  |
| H | -7.13609100 | -2.47409100 | 2.77660000  |
| C | 4.12334700  | -0.20516600 | -2.22352700 |
| C | 4.85165500  | -0.01986200 | -3.40202700 |
| C | 4.63405200  | -1.06511000 | -1.24501600 |
| C | 6.06441600  | -0.67258100 | -3.60035400 |
| H | 4.46749500  | 0.65204600  | -4.16586500 |
| C | 5.84687500  | -1.71849900 | -1.44211900 |
| H | 4.08808100  | -1.22681400 | -0.32002900 |
| C | 6.56587500  | -1.52469200 | -2.61983700 |
| H | 6.61850600  | -0.51130300 | -4.51913400 |
| H | 6.23206800  | -2.37891100 | -0.67138100 |
| H | 7.51292500  | -2.03178800 | -2.77038100 |
| H | 2.27161800  | -0.06576200 | -0.03297200 |
| C | -2.64014700 | 4.25307900  | -0.30236400 |
| C | -1.36221100 | 3.83990700  | -0.69587900 |
| C | -1.16386700 | 3.26719800  | -1.95201800 |
| C | -2.26282600 | 3.09586000  | -2.79067900 |
| C | -3.53353100 | 3.51338400  | -2.39816900 |
| C | -3.72911000 | 4.10096000  | -1.15085400 |
| C | -2.62364600 | 4.88557100  | 1.06067600  |
| C | -1.14079100 | 5.26267200  | 1.22274100  |
| C | -0.32961100 | 4.26695100  | 0.32868700  |
| H | -0.17177200 | 2.98126400  | -2.27790400 |
| H | -2.12502400 | 2.64829200  | -3.77015700 |
| H | -4.37458500 | 3.38174300  | -3.07149900 |
| H | -4.71400700 | 4.44320200  | -0.84746100 |
| H | -2.95622500 | 4.16799200  | 1.82016500  |
| H | -0.98450600 | 6.24870000  | 0.78033000  |
| H | -3.26785500 | 5.76344800  | 1.14222100  |
| H | 0.54049500  | 4.73400600  | -0.12953500 |
| N | 0.24265600  | 3.18661400  | 1.20406300  |
| O | -0.67827800 | 5.38027500  | 2.54961700  |
| C | 1.14604500  | 2.22624400  | 0.90575800  |
| C | 0.07699000  | 3.15469500  | 2.56500700  |
| N | 1.47213200  | 1.66205400  | 2.07505200  |
| N | 0.80697900  | 2.22759500  | 3.11533600  |
| C | -0.74460200 | 4.17990600  | 3.27875300  |
| H | -1.77349600 | 3.82917000  | 3.42047400  |
| H | -0.30377700 | 4.35863100  | 4.26000200  |
| C | 2.50230600  | 0.70257500  | 2.36429300  |
| C | 2.17697900  | -0.42149400 | 3.11303700  |
| C | 3.80023200  | 0.94228600  | 1.92353800  |

|    |            |             |             |
|----|------------|-------------|-------------|
| C  | 3.16732200 | -1.35731900 | 3.39029100  |
| C  | 4.78737300 | 0.00447000  | 2.19565300  |
| C  | 4.45899700 | -1.14245500 | 2.91644400  |
| H  | 2.94079800 | -2.24476200 | 3.96936200  |
| H  | 5.80292700 | 0.15913400  | 1.85012800  |
| H  | 4.03796200 | 1.84168100  | 1.36548900  |
| H  | 1.16701100 | -0.55496500 | 3.48566800  |
| Cl | 5.68916000 | -2.32286200 | 3.23434100  |
| H  | 2.08644400 | -0.44710100 | -3.97626000 |

Variable frequencies

|           |          |          |
|-----------|----------|----------|
| -283.4818 | 13.1942  | 18.6086  |
| 22.8503   | 24.0944  | 28.1823  |
| 35.1548   | 41.1436  | 46.5998  |
| 54.0851   | 58.1749  | 61.4258  |
| 65.0116   | 70.0848  | 72.1388  |
| 78.1801   | 85.2538  | 86.4331  |
| 91.9821   | 95.2334  | 104.7239 |
| 114.7647  | 133.5370 | 145.5027 |
| 148.9103  | 149.1625 | 156.6803 |
| 173.4779  | 179.7976 | 186.5570 |
| 193.9111  | 208.1219 | 212.9280 |
| 217.9143  | 242.6567 | 246.8586 |
| 251.4501  | 254.5882 | 267.6425 |
| 274.1340  | 282.5198 | 288.6451 |
| 293.7071  | 304.1851 | 319.0202 |
| 328.3545  | 336.8644 | 343.9654 |
| 355.1212  | 362.9538 | 374.9496 |
| 381.5526  | 385.9139 | 396.8214 |
| 410.0094  | 416.0080 | 417.9797 |
| 420.9354  | 422.4518 | 426.8848 |
| 442.9855  | 452.6698 | 454.5010 |
| 471.1127  | 478.8929 | 493.1265 |
| 498.7163  | 511.8182 | 521.4914 |
| 525.1838  | 529.2818 | 536.6125 |
| 557.2055  | 560.7222 | 579.9896 |
| 586.7763  | 592.3426 | 597.2771 |
| 607.0231  | 611.4657 | 623.5389 |
| 626.4539  | 632.7970 | 641.0451 |
| 643.1346  | 644.2722 | 653.3174 |
| 664.6454  | 668.2545 | 698.5062 |
| 707.3711  | 710.3493 | 711.2570 |
| 718.5349  | 719.1108 | 720.1725 |
| 728.8706  | 751.5545 | 762.1445 |

|           |           |           |
|-----------|-----------|-----------|
| 765.4466  | 772.8000  | 779.6259  |
| 783.9329  | 785.9958  | 804.1067  |
| 813.3083  | 818.9351  | 829.0120  |
| 840.0418  | 844.0058  | 846.9628  |
| 849.6268  | 852.6496  | 862.0496  |
| 865.3327  | 866.2136  | 871.2734  |
| 871.6504  | 888.4702  | 900.7363  |
| 911.7296  | 916.3800  | 939.8456  |
| 946.2445  | 955.4142  | 980.5009  |
| 981.2070  | 989.8498  | 990.0647  |
| 991.1888  | 996.9595  | 1000.9688 |
| 1005.9232 | 1008.5412 | 1014.2690 |
| 1017.5135 | 1018.9147 | 1021.8745 |
| 1023.9789 | 1024.6776 | 1027.3587 |
| 1035.8725 | 1039.2004 | 1039.4634 |
| 1056.5174 | 1063.8445 | 1065.9675 |
| 1070.3445 | 1073.4350 | 1075.6602 |
| 1084.4479 | 1099.9478 | 1105.4803 |
| 1113.2017 | 1118.2908 | 1121.6550 |
| 1123.8296 | 1134.2006 | 1136.5611 |
| 1139.1274 | 1147.9355 | 1151.8897 |
| 1159.1454 | 1161.0460 | 1170.8464 |
| 1175.8040 | 1181.5724 | 1182.2391 |
| 1185.0689 | 1185.5094 | 1186.6802 |
| 1201.2010 | 1202.9474 | 1204.2049 |
| 1205.8827 | 1215.8912 | 1215.9966 |
| 1227.8953 | 1233.6020 | 1241.9611 |
| 1248.0312 | 1254.7694 | 1259.7459 |
| 1280.1596 | 1281.4209 | 1287.9605 |
| 1299.8818 | 1303.6990 | 1315.3621 |
| 1319.9848 | 1321.7955 | 1330.4502 |
| 1333.2274 | 1335.1058 | 1337.4918 |
| 1349.5326 | 1354.1040 | 1358.2008 |
| 1358.9867 | 1359.5265 | 1360.6810 |
| 1366.0145 | 1369.7871 | 1377.6492 |
| 1379.8479 | 1384.7090 | 1423.8432 |
| 1425.0530 | 1446.2465 | 1453.2454 |
| 1456.6740 | 1462.3103 | 1462.8344 |
| 1483.1226 | 1490.2733 | 1494.5552 |
| 1497.5017 | 1502.0052 | 1502.4039 |
| 1503.7252 | 1504.1405 | 1512.9063 |
| 1514.2798 | 1520.6855 | 1533.1884 |
| 1536.9949 | 1545.2905 | 1546.7128 |
| 1550.1379 | 1567.9751 | 1574.2165 |

|           |           |           |
|-----------|-----------|-----------|
| 1629.9502 | 1642.6434 | 1669.7236 |
| 1671.8407 | 1672.5520 | 1677.8790 |
| 1679.0630 | 1681.7813 | 1687.4486 |
| 1688.8094 | 1695.4509 | 1696.7463 |
| 1700.5409 | 1720.6415 | 3065.6485 |
| 3074.6572 | 3077.4127 | 3096.0220 |
| 3144.9627 | 3147.9308 | 3155.9059 |
| 3158.4098 | 3161.1658 | 3174.5688 |
| 3177.7852 | 3181.8272 | 3183.8281 |
| 3185.4117 | 3188.3434 | 3195.7338 |
| 3197.6980 | 3201.7358 | 3202.4602 |
| 3203.3705 | 3212.6835 | 3213.7337 |
| 3216.0412 | 3216.1502 | 3217.5618 |
| 3218.4077 | 3222.3640 | 3230.1756 |
| 3231.5819 | 3232.6412 | 3233.2607 |
| 3234.4871 | 3234.7030 | 3234.8008 |
| 3235.6791 | 3238.5608 | 3247.5835 |
| 3252.7905 | 3254.4815 | 3270.8479 |

## <sup>2</sup>TS5S<sup>f</sup>

Zero-point correction=0.778927

Thermal correction to Energy=0.826542

Thermal correction to Enthalpy=0.827486

Thermal correction to Gibbs Free Energy=0.691516

Sum of electronic and zero-point Energies=-3207.924980

Sum of electronic and thermal Energies=-3207.877365

Sum of electronic and thermal Enthalpies=-3207.876421

Sum of electronic and thermal Free Energies=-3208.012391

### Cartesian coordinate

|   |             |             |             |
|---|-------------|-------------|-------------|
| N | 2.42025400  | -0.15267100 | 0.20828500  |
| N | 3.55370900  | -0.71494900 | -0.37016700 |
| C | 3.28976000  | -1.50088700 | -1.57771300 |
| C | 2.45388700  | 1.19272200  | 0.55296800  |
| C | 1.40349400  | 1.72059500  | 1.23961100  |
| C | 0.20307200  | 0.95356500  | 1.51153700  |
| C | 0.38697500  | -0.48179100 | 1.40193100  |
| C | 1.44540700  | -0.98182800 | 0.73209400  |
| C | -1.02215700 | 1.44380800  | 0.13703900  |
| C | -2.20235600 | 0.65943500  | 0.24554200  |
| C | -2.38395400 | -0.49557900 | -0.53113000 |
| O | -1.54286000 | -1.09373800 | -1.23176500 |
| S | 4.55424800  | -1.49870500 | 0.80283100  |

|   |             |             |             |
|---|-------------|-------------|-------------|
| O | 4.42608600  | -0.66933200 | 1.98878700  |
| C | 6.13709300  | -1.29728400 | 0.05289400  |
| O | 4.21605900  | -2.91652800 | 0.84577000  |
| C | 6.80599100  | -2.41245000 | -0.43894100 |
| C | 8.04995500  | -2.22786800 | -1.03456700 |
| C | 8.61601600  | -0.95466500 | -1.13993200 |
| C | 7.91059200  | 0.14602600  | -0.63423700 |
| C | 6.67220800  | -0.01220200 | -0.03158900 |
| C | 3.64417300  | 1.99553300  | 0.18428000  |
| C | 4.33093000  | 2.68704800  | 1.18446100  |
| C | 5.43966100  | 3.46652500  | 0.85908300  |
| C | 5.86368900  | 3.55912800  | -0.46386400 |
| C | 5.17617000  | 2.87248700  | -1.46527000 |
| C | 4.07176400  | 2.09270600  | -1.14392500 |
| C | 9.97196800  | -0.76283100 | -1.76413700 |
| H | 2.77207400  | -0.85580400 | -2.28881600 |
| H | 4.25243000  | -1.79559900 | -2.00017300 |
| H | 2.69460500  | -2.39912500 | -1.38267200 |
| H | 1.44340300  | 2.77149200  | 1.50024300  |
| H | -0.36087700 | -1.15960500 | 1.79552200  |
| H | 1.61869700  | -2.04251100 | 0.58361000  |
| H | -0.40130900 | 1.14660800  | -0.70940500 |
| H | 6.35818600  | -3.39660000 | -0.34895400 |
| H | 8.58897100  | -3.08679900 | -1.42241000 |
| H | 8.33957900  | 1.14089500  | -0.71519100 |
| H | 6.12918000  | 0.84090700  | 0.36568000  |
| H | 4.01045800  | 2.58738000  | 2.21664300  |
| H | 5.97395800  | 3.99322800  | 1.64253600  |
| H | 6.72779700  | 4.16477600  | -0.71682900 |
| H | 5.50284100  | 2.94391300  | -2.49735900 |
| H | 3.53748000  | 1.55684100  | -1.92287900 |
| H | 10.73188400 | -0.62967200 | -0.98784100 |
| H | 10.25768400 | -1.62553600 | -2.36840900 |
| H | 9.99034500  | 0.12750400  | -2.39711500 |
| C | -1.16279500 | 2.92161600  | 0.28902200  |
| C | -0.38822000 | 3.76395200  | -0.51531900 |
| C | -2.04876700 | 3.49566000  | 1.20879100  |
| C | -0.51499000 | 5.14760400  | -0.42403300 |
| H | 0.31529400  | 3.32711700  | -1.21996500 |
| C | -2.17288900 | 4.87731300  | 1.30293500  |
| H | -2.65542100 | 2.86521300  | 1.85409600  |
| C | -1.41156900 | 5.70809000  | 0.48178100  |
| H | 0.08703500  | 5.78635500  | -1.06202100 |
| H | -2.87045100 | 5.30723100  | 2.01443500  |

|    |             |             |             |
|----|-------------|-------------|-------------|
| H  | -1.51566700 | 6.78567100  | 0.55188900  |
| H  | -3.02010500 | 0.99521700  | 0.87255600  |
| C  | -3.31509000 | -4.74461700 | 1.05029300  |
| C  | -2.58144300 | -3.83055200 | 0.28736500  |
| C  | -1.31141600 | -3.42405700 | 0.68446000  |
| C  | -0.80425800 | -3.91076000 | 1.88892800  |
| C  | -1.55040100 | -4.79452200 | 2.67005500  |
| C  | -2.80695400 | -5.22676400 | 2.25057600  |
| C  | -4.60078100 | -5.11638400 | 0.36011500  |
| C  | -4.29370100 | -4.71591200 | -1.09870100 |
| C  | -3.32307500 | -3.50800300 | -0.99027100 |
| H  | -0.73829700 | -2.74987800 | 0.05780300  |
| H  | 0.18766500  | -3.61471000 | 2.21850100  |
| H  | -1.13710800 | -5.16752300 | 3.60131400  |
| H  | -3.37067300 | -5.94194200 | 2.84135300  |
| H  | -5.43954400 | -4.54491400 | 0.77577600  |
| H  | -3.73085300 | -5.52252200 | -1.57319700 |
| H  | -4.85303100 | -6.17514200 | 0.44549400  |
| H  | -2.68168700 | -3.37175100 | -1.86100000 |
| N  | -4.16909700 | -2.27786200 | -0.89713200 |
| O  | -5.39965300 | -4.48637300 | -1.94019800 |
| C  | -3.80212400 | -1.00563100 | -0.64743100 |
| C  | -5.52393100 | -2.26593100 | -1.10460100 |
| N  | -4.93127500 | -0.29019600 | -0.70484900 |
| N  | -6.01163100 | -1.06442200 | -0.98027500 |
| C  | -6.28691500 | -3.50243200 | -1.47039900 |
| H  | -6.87652900 | -3.84704100 | -0.61195600 |
| H  | -6.97551100 | -3.26579600 | -2.28313000 |
| C  | -5.11124200 | 1.12868600  | -0.55094900 |
| C  | -5.97765600 | 1.57599300  | 0.43740000  |
| C  | -4.40844400 | 2.00740700  | -1.36897000 |
| C  | -6.13032500 | 2.94502100  | 0.62985800  |
| C  | -4.54514700 | 3.37335600  | -1.16184700 |
| C  | -5.40359900 | 3.82802500  | -0.16283200 |
| H  | -6.80100200 | 3.32398200  | 1.39182500  |
| H  | -3.98835300 | 4.08126800  | -1.76490400 |
| H  | -3.74783300 | 1.63145100  | -2.14268000 |
| H  | -6.52145000 | 0.86379500  | 1.04813700  |
| Cl | -5.56841600 | 5.53655000  | 0.09890400  |
| H  | -0.40117000 | 1.30194000  | 2.34688400  |

Variable frequencies

|           |         |         |
|-----------|---------|---------|
| -173.1659 | 6.3187  | 11.5749 |
| 17.6047   | 19.7437 | 22.0284 |

|           |           |           |
|-----------|-----------|-----------|
| 25.2684   | 31.4377   | 35.2299   |
| 41.4046   | 50.1497   | 53.1193   |
| 58.5520   | 67.9637   | 70.2535   |
| 72.6158   | 78.8893   | 83.9956   |
| 85.7871   | 89.3986   | 103.3543  |
| 104.8591  | 115.6523  | 123.6421  |
| 138.7853  | 146.3389  | 147.1687  |
| 162.5715  | 176.0848  | 180.6351  |
| 189.8989  | 200.8591  | 206.1986  |
| 207.6292  | 216.1655  | 243.3574  |
| 246.6793  | 255.4835  | 256.4040  |
| 259.0274  | 265.5810  | 282.5777  |
| 291.0583  | 300.0083  | 307.5052  |
| 313.2667  | 328.5284  | 342.6519  |
| 345.8316  | 359.0394  | 365.1734  |
| 375.5720  | 380.2280  | 383.1385  |
| 406.7838  | 410.7200  | 415.0340  |
| 416.9446  | 423.4427  | 427.4002  |
| 442.4201  | 447.9195  | 457.7085  |
| 464.8515  | 487.7980  | 495.2662  |
| 498.2239  | 506.3060  | 518.3822  |
| 528.9424  | 541.1899  | 542.2020  |
| 558.3549  | 562.6875  | 575.2045  |
| 582.3135  | 587.5552  | 593.1397  |
| 607.7045  | 607.9971  | 622.6745  |
| 627.8996  | 629.3780  | 640.4903  |
| 642.3472  | 644.2984  | 653.6912  |
| 665.3014  | 681.4629  | 699.9443  |
| 707.9012  | 712.5984  | 717.8214  |
| 718.5603  | 720.0365  | 726.8208  |
| 730.6586  | 758.9077  | 763.5127  |
| 768.1902  | 775.7663  | 785.9155  |
| 791.0999  | 792.5922  | 803.3038  |
| 814.3314  | 826.5653  | 829.6845  |
| 838.3559  | 844.1013  | 845.9788  |
| 850.3860  | 854.4116  | 863.1337  |
| 868.0920  | 879.9365  | 880.7879  |
| 885.1477  | 889.8942  | 900.3101  |
| 913.3159  | 915.1509  | 946.6888  |
| 959.1538  | 976.4441  | 981.4301  |
| 988.5133  | 990.0077  | 995.8089  |
| 996.4011  | 1004.3002 | 1005.4236 |
| 1008.8962 | 1009.2538 | 1015.0096 |
| 1015.7772 | 1019.2752 | 1025.8406 |

|           |           |           |
|-----------|-----------|-----------|
| 1033.3947 | 1033.8024 | 1034.2145 |
| 1035.3759 | 1038.9875 | 1046.3249 |
| 1051.6190 | 1067.7266 | 1069.1202 |
| 1071.4486 | 1072.9022 | 1074.1931 |
| 1094.8789 | 1099.5643 | 1105.6758 |
| 1115.9106 | 1118.3591 | 1121.7531 |
| 1126.3657 | 1131.6837 | 1134.4323 |
| 1138.0347 | 1144.6595 | 1147.6622 |
| 1153.2536 | 1159.3089 | 1160.8157 |
| 1174.5025 | 1179.8343 | 1185.4750 |
| 1186.6382 | 1187.8121 | 1193.6989 |
| 1198.9389 | 1205.0309 | 1205.3893 |
| 1208.1132 | 1212.2803 | 1212.5999 |
| 1219.8642 | 1232.9297 | 1239.3890 |
| 1248.1540 | 1252.4359 | 1265.2354 |
| 1271.4123 | 1280.5795 | 1293.6210 |
| 1300.4769 | 1303.5399 | 1314.8871 |
| 1319.3397 | 1321.4939 | 1324.6228 |
| 1330.5304 | 1336.5213 | 1338.6138 |
| 1347.2375 | 1353.3095 | 1356.3145 |
| 1357.7383 | 1358.8933 | 1364.8125 |
| 1367.0245 | 1371.7459 | 1377.3177 |
| 1381.9357 | 1384.5381 | 1423.6128 |
| 1429.4115 | 1449.6388 | 1454.6923 |
| 1455.7798 | 1457.1262 | 1461.9299 |
| 1489.8824 | 1493.9430 | 1498.4496 |
| 1499.4405 | 1500.1970 | 1501.7876 |
| 1503.3026 | 1506.2144 | 1509.4379 |
| 1510.1209 | 1526.4903 | 1533.4975 |
| 1541.1408 | 1545.9986 | 1547.5690 |
| 1549.0534 | 1569.9094 | 1571.9418 |
| 1627.9516 | 1638.4370 | 1667.8378 |
| 1669.2466 | 1670.3939 | 1671.3714 |
| 1680.1808 | 1682.7413 | 1685.2254 |
| 1686.7278 | 1693.0133 | 1695.1488 |
| 1705.9013 | 1723.2727 | 3071.3732 |
| 3075.5481 | 3083.9001 | 3090.7796 |
| 3146.1909 | 3154.6288 | 3156.0806 |
| 3158.0273 | 3162.0935 | 3167.1773 |
| 3173.3858 | 3179.3093 | 3181.7086 |
| 3187.6900 | 3201.9548 | 3208.9251 |
| 3209.5583 | 3210.4657 | 3210.4751 |
| 3211.7873 | 3212.9592 | 3215.1482 |
| 3223.5947 | 3226.3382 | 3229.1118 |



|           |           |           |
|-----------|-----------|-----------|
| 3229.2117 | 3230.7502 | 3231.7698 |
| 3234.5944 | 3235.4302 | 3238.0670 |
| 3239.0738 | 3240.7635 | 3243.7494 |
| 3244.3156 | 3244.9782 | 3247.4806 |
| 3250.2280 | 3251.4658 | 3257.1227 |

## <sup>2</sup>M5R

Zero-point correction=0.780169

Thermal correction to Energy=0.827864

Thermal correction to Enthalpy=0.828808

Thermal correction to Gibbs Free Energy=0.694887

Sum of electronic and zero-point Energies=-3207.948658

Sum of electronic and thermal Energies=-3207.900964

Sum of electronic and thermal Enthalpies=-3207.900019

Sum of electronic and thermal Free Energies=-3208.033940

### Cartesian coordinate

|   |             |             |             |
|---|-------------|-------------|-------------|
| N | -0.24365000 | -3.16172900 | -0.84817000 |
| N | 0.72096300  | -3.21282400 | 0.15549600  |
| C | 0.81842300  | -4.48818300 | 0.86841900  |
| C | -1.59984900 | -3.24588100 | -0.48888700 |
| C | -2.58251400 | -2.72670700 | -1.22884600 |
| C | -2.31834100 | -1.86927700 | -2.43798200 |
| C | -0.86219700 | -1.94249500 | -2.81326700 |
| C | 0.09240200  | -2.47702000 | -2.03809600 |
| C | -2.73636400 | -0.36671800 | -2.20088400 |
| C | -2.00539500 | 0.17258200  | -1.02947800 |
| C | -1.16118700 | 1.31329000  | -1.08988500 |
| O | -0.86723900 | 1.95288500  | -2.10532300 |
| S | 0.75610900  | -1.82751200 | 1.14190800  |
| O | 0.53801500  | -0.72356700 | 0.20401800  |
| C | 2.42824300  | -1.80547900 | 1.69472100  |
| O | -0.13935000 | -1.93317600 | 2.29434300  |
| C | 2.68241000  | -1.55873000 | 3.03765500  |
| C | 4.00555600  | -1.40757800 | 3.44294100  |
| C | 5.05499200  | -1.50335100 | 2.52666600  |
| C | 4.75917000  | -1.76104800 | 1.18014100  |
| C | 3.45017200  | -1.90775200 | 0.75040900  |
| H | 0.96669700  | -5.26792700 | 0.12127500  |
| H | 1.69278100  | -4.44804300 | 1.52115400  |
| H | -0.06666800 | -4.71160800 | 1.47247900  |
| H | -3.60924200 | -2.91772600 | -0.93544900 |
| H | -2.94441100 | -2.20138100 | -3.27692200 |

|   |             |             |             |
|---|-------------|-------------|-------------|
| H | -0.55857100 | -1.51771600 | -3.76537300 |
| H | -2.43920800 | 0.20088700  | -3.08947300 |
| H | 1.86089400  | -1.49003100 | 3.74326400  |
| H | 4.22530800  | -1.21805500 | 4.48917200  |
| H | 5.56865500  | -1.84809900 | 0.46018300  |
| H | 3.21855300  | -2.10253000 | -0.29338000 |
| C | -4.23995500 | -0.21568300 | -2.01231000 |
| C | -4.85785500 | -0.39446700 | -0.77052500 |
| C | -5.03146600 | 0.08525100  | -3.12330300 |
| C | -6.24006800 | -0.27526500 | -0.64550500 |
| H | -4.26566600 | -0.62821500 | 0.11154700  |
| C | -6.41243300 | 0.19932400  | -3.00035800 |
| H | -4.55880100 | 0.23344300  | -4.09074100 |
| C | -7.02046000 | 0.02130800  | -1.75956400 |
| H | -6.70502400 | -0.41440800 | 0.32599200  |
| H | -7.01284900 | 0.43423600  | -3.87309700 |
| H | -8.09685100 | 0.11535300  | -1.66135400 |
| H | -2.06092900 | -0.36654300 | -0.08909100 |
| C | 3.60481300  | 3.67397300  | -0.97574800 |
| C | 2.22997600  | 3.47674000  | -1.06475600 |
| C | 1.36544700  | 4.49469000  | -1.45255100 |
| C | 1.90812400  | 5.74419500  | -1.73766700 |
| C | 3.28634800  | 5.95519400  | -1.64168700 |
| C | 4.14421100  | 4.92392200  | -1.26715700 |
| C | 4.31659800  | 2.40397100  | -0.58374700 |
| C | 3.20098400  | 1.42222300  | -0.15714100 |
| C | 1.86850800  | 2.05422300  | -0.71239900 |
| H | 0.29878800  | 4.30965300  | -1.54223200 |
| H | 1.25937200  | 6.55903200  | -2.04035600 |
| H | 3.69363800  | 6.93586600  | -1.86517000 |
| H | 5.21436600  | 5.09398400  | -1.20091900 |
| H | 5.02850400  | 2.53638200  | 0.23656300  |
| H | 3.33406100  | 0.42796900  | -0.58824100 |
| H | 4.87475300  | 1.99487000  | -1.43296400 |
| H | 1.50168500  | 1.49232100  | -1.57320200 |
| N | 0.81470800  | 1.99957400  | 0.30538800  |
| O | 3.19500900  | 1.19422000  | 1.24293600  |
| C | -0.48090600 | 1.69355500  | 0.19684100  |
| C | 1.09631900  | 2.07430900  | 1.63839300  |
| N | -0.94964300 | 1.64715300  | 1.44175800  |
| N | 0.02985300  | 1.86394200  | 2.35981200  |
| C | 2.53621800  | 2.17577900  | 2.01901600  |
| H | 2.92490600  | 3.18596500  | 1.83337600  |
| H | 2.66891300  | 1.91799400  | 3.06963200  |

|    |             |             |             |
|----|-------------|-------------|-------------|
| C  | -2.29455500 | 1.37428400  | 1.85953400  |
| C  | -3.33340800 | 2.16013000  | 1.37236700  |
| C  | -2.50871300 | 0.30917200  | 2.72838000  |
| C  | -4.63418900 | 1.87302200  | 1.76980500  |
| C  | -3.81006300 | 0.03186000  | 3.12960000  |
| C  | -4.85680100 | 0.81672500  | 2.64916500  |
| H  | -5.46616000 | 2.46438000  | 1.40587000  |
| H  | -4.01437200 | -0.78996200 | 3.80587400  |
| H  | -1.67245400 | -0.29982600 | 3.05721000  |
| H  | -3.13273800 | 2.99088000  | 0.70315400  |
| Cl | -6.48111800 | 0.46173300  | 3.15312400  |
| H  | -1.79267500 | -3.82935200 | 0.40515900  |
| C  | 1.53157700  | -2.41219500 | -2.38600500 |
| C  | 2.35855000  | -3.53854300 | -2.32357700 |
| C  | 2.07828400  | -1.18595100 | -2.76979400 |
| C  | 3.71114900  | -3.43282100 | -2.62954100 |
| H  | 1.93505300  | -4.49634800 | -2.03542700 |
| C  | 3.43387200  | -1.07739500 | -3.07270600 |
| H  | 1.42305500  | -0.32058200 | -2.82157600 |
| C  | 4.25478200  | -2.20040000 | -2.99447600 |
| H  | 4.34414800  | -4.31288000 | -2.58426300 |
| H  | 3.84656700  | -0.11729200 | -3.36927200 |
| H  | 5.31148900  | -2.12071000 | -3.22787600 |
| C  | 6.48503100  | -1.33676300 | 2.96433800  |
| H  | 7.08024000  | -2.21072900 | 2.68595600  |
| H  | 6.93659600  | -0.46635500 | 2.47918600  |
| H  | 6.55911200  | -1.20201900 | 4.04463700  |

Variable frequencies

|          |          |          |
|----------|----------|----------|
| 10.4578  | 17.3502  | 20.7626  |
| 26.7066  | 29.5944  | 32.8102  |
| 36.9309  | 40.8547  | 44.1966  |
| 47.6230  | 49.7776  | 55.2347  |
| 63.4531  | 70.9597  | 76.4350  |
| 79.6637  | 83.2898  | 87.5420  |
| 89.3134  | 101.3206 | 107.2045 |
| 114.3201 | 118.8988 | 123.8538 |
| 136.3389 | 143.5770 | 158.1306 |
| 166.7679 | 176.5640 | 191.6488 |
| 198.9131 | 209.6907 | 217.9479 |
| 220.0198 | 227.4183 | 231.0060 |
| 249.0655 | 254.3444 | 261.7065 |
| 268.8256 | 272.4697 | 288.9922 |
| 310.5652 | 314.0616 | 323.9481 |

|           |           |           |
|-----------|-----------|-----------|
| 331.3702  | 338.7676  | 351.2701  |
| 356.9803  | 365.9524  | 372.8217  |
| 390.5560  | 405.3770  | 407.6339  |
| 416.6002  | 417.6770  | 421.0682  |
| 423.6679  | 426.8902  | 439.9953  |
| 450.0423  | 453.7991  | 471.1553  |
| 481.3943  | 487.8365  | 494.6580  |
| 498.8120  | 513.1324  | 520.0616  |
| 523.6465  | 535.9824  | 549.6702  |
| 563.9701  | 566.9562  | 572.4450  |
| 586.2356  | 602.2046  | 616.5920  |
| 619.8848  | 626.9146  | 628.3181  |
| 630.7367  | 640.3478  | 641.1626  |
| 645.7490  | 658.3417  | 663.8888  |
| 678.8547  | 709.3996  | 715.6322  |
| 717.9863  | 720.2778  | 723.7514  |
| 725.9705  | 730.3722  | 733.1499  |
| 740.5859  | 760.7664  | 763.7775  |
| 768.5700  | 779.3831  | 788.1465  |
| 791.9489  | 798.0913  | 813.1987  |
| 816.6654  | 830.8097  | 838.4780  |
| 839.9546  | 840.7096  | 844.6983  |
| 856.6433  | 865.9326  | 868.0897  |
| 873.0026  | 880.4176  | 886.5075  |
| 887.8535  | 890.6915  | 892.9152  |
| 903.2755  | 919.4382  | 947.1599  |
| 955.2132  | 957.4082  | 973.6461  |
| 974.9680  | 989.3795  | 990.6817  |
| 992.2433  | 1001.0905 | 1006.5966 |
| 1008.7460 | 1010.5701 | 1014.4141 |
| 1015.1242 | 1017.0797 | 1023.7815 |
| 1027.8898 | 1028.8312 | 1032.2042 |
| 1033.3874 | 1033.5286 | 1039.4233 |
| 1047.9816 | 1054.9533 | 1067.0329 |
| 1067.2236 | 1067.5689 | 1073.1293 |
| 1077.2321 | 1081.6636 | 1106.0766 |
| 1112.8289 | 1115.9930 | 1119.3027 |
| 1123.2318 | 1133.5845 | 1135.8182 |
| 1141.8057 | 1143.3934 | 1144.9649 |
| 1150.2993 | 1164.2588 | 1166.9672 |
| 1173.5949 | 1180.8214 | 1181.5176 |
| 1185.2422 | 1195.4088 | 1202.7417 |
| 1205.1423 | 1206.1476 | 1209.7441 |
| 1210.3153 | 1221.6725 | 1222.9489 |

|           |           |           |
|-----------|-----------|-----------|
| 1226.8318 | 1233.9340 | 1248.3002 |
| 1254.9116 | 1256.1272 | 1270.6740 |
| 1278.7802 | 1283.0546 | 1289.9968 |
| 1297.3284 | 1301.0225 | 1306.2858 |
| 1313.6201 | 1324.3432 | 1327.2013 |
| 1331.2840 | 1332.8402 | 1333.7011 |
| 1337.7306 | 1347.0223 | 1349.5479 |
| 1359.2206 | 1363.0641 | 1363.3891 |
| 1368.1691 | 1373.2828 | 1374.6844 |
| 1379.9829 | 1386.6432 | 1425.6228 |
| 1427.1865 | 1431.3324 | 1444.2603 |
| 1455.1075 | 1456.7966 | 1465.0585 |
| 1476.9032 | 1482.4558 | 1495.0618 |
| 1497.2744 | 1498.3662 | 1500.7575 |
| 1501.6963 | 1505.2385 | 1516.4743 |
| 1518.7966 | 1519.8583 | 1541.8398 |
| 1545.5471 | 1548.8045 | 1552.4419 |
| 1554.8436 | 1563.9457 | 1610.2186 |
| 1632.3551 | 1668.1175 | 1669.1632 |
| 1675.9300 | 1677.2231 | 1684.0796 |
| 1685.2036 | 1691.5548 | 1692.3103 |
| 1695.6126 | 1697.8993 | 1703.4185 |
| 1732.5480 | 1779.1097 | 3057.0992 |
| 3077.2677 | 3079.6067 | 3080.3658 |
| 3081.5648 | 3109.0567 | 3127.7593 |
| 3148.6472 | 3156.6241 | 3164.1944 |
| 3166.8050 | 3175.1623 | 3186.0332 |
| 3198.3916 | 3198.8934 | 3200.6343 |
| 3204.0192 | 3205.3833 | 3206.9048 |
| 3208.1130 | 3211.6807 | 3212.8557 |
| 3213.3570 | 3218.8972 | 3219.6296 |
| 3220.3696 | 3221.2215 | 3221.2318 |
| 3223.0077 | 3230.1028 | 3231.7646 |
| 3232.6052 | 3233.5895 | 3235.3630 |
| 3235.6440 | 3236.2128 | 3240.2321 |
| 3241.3981 | 3243.5882 | 3244.9308 |

## **<sup>2</sup>M5S**

Zero-point correction=0.781294

Thermal correction to Energy=0.828308

Thermal correction to Enthalpy=0.829252

Thermal correction to Gibbs Free Energy=0.699180

Sum of electronic and zero-point Energies=-3207.950817

Sum of electronic and thermal Energies=-3207.903804  
Sum of electronic and thermal Enthalpies=-3207.902860  
Sum of electronic and thermal Free Energies=-3208.032931

Cartesian coordinate

|   |             |             |             |
|---|-------------|-------------|-------------|
| N | 0.57737100  | 0.37432500  | -2.44195200 |
| N | 1.53957900  | 1.18560400  | -1.86519900 |
| C | 2.81827900  | 1.26559400  | -2.57537500 |
| C | 0.82966700  | -0.99330900 | -2.61303100 |
| C | -0.14282200 | -1.87531200 | -2.85906700 |
| C | -1.60167600 | -1.52192900 | -2.75792000 |
| C | -1.76444900 | -0.02603100 | -2.70488900 |
| C | -0.75480200 | 0.83625500  | -2.49663800 |
| C | -2.20422900 | -2.22935500 | -1.47741500 |
| C | -1.37957000 | -1.80141600 | -0.32414900 |
| C | -0.62038800 | -2.68849700 | 0.48354500  |
| O | -0.55938500 | -3.91789700 | 0.38401400  |
| S | 1.67945300  | 1.04240300  | -0.17381300 |
| O | 0.32066300  | 0.76308100  | 0.28785000  |
| C | 2.14875000  | 2.67781900  | 0.29024900  |
| O | 2.74749900  | 0.11485800  | 0.21075000  |
| C | 3.42982600  | 2.91428400  | 0.77747300  |
| C | 3.77818500  | 4.21586200  | 1.12327200  |
| C | 2.86712300  | 5.26689900  | 0.98355800  |
| C | 1.58609800  | 4.99135900  | 0.48652000  |
| C | 1.21349600  | 3.70205600  | 0.13780700  |
| C | 3.24161800  | 6.66959900  | 1.37869800  |
| H | 2.59904300  | 1.50599600  | -3.61582800 |
| H | 3.40234700  | 2.07768500  | -2.13663400 |
| H | 3.39568000  | 0.33616600  | -2.51699500 |
| H | 0.13066300  | -2.90497700 | -3.06053600 |
| H | -2.75821400 | 0.38823500  | -2.83605600 |
| H | -2.09622300 | -3.31170100 | -1.61081500 |
| H | 4.13408900  | 2.09494500  | 0.87935500  |
| H | 4.77400300  | 4.41881500  | 1.50512300  |
| H | 0.87108500  | 5.80014000  | 0.36534700  |
| H | 0.21916700  | 3.49305400  | -0.24688700 |
| H | 4.32483000  | 6.79544100  | 1.42227300  |
| H | 2.83414400  | 7.39748700  | 0.67352900  |
| H | 2.83593400  | 6.90630100  | 2.36742700  |
| C | -3.67469600 | -1.89546800 | -1.29114800 |
| C | -4.62882300 | -2.67245900 | -1.95212400 |
| C | -4.10400800 | -0.81177600 | -0.51926200 |
| C | -5.98348500 | -2.37365300 | -1.84762900 |

|   |             |             |             |
|---|-------------|-------------|-------------|
| H | -4.30557900 | -3.52100600 | -2.54987600 |
| C | -5.46083000 | -0.51518900 | -0.40892400 |
| H | -3.38461800 | -0.19468400 | 0.01496300  |
| C | -6.40358100 | -1.29421300 | -1.07343400 |
| H | -6.71209400 | -2.98854000 | -2.36574900 |
| H | -5.77794500 | 0.32608200  | 0.20009400  |
| H | -7.46020400 | -1.06419300 | -0.98639200 |
| H | -1.25235500 | -0.73575800 | -0.15205500 |
| C | 3.96933000  | -2.68944800 | -0.47694800 |
| C | 2.72983400  | -3.28796400 | -0.22258000 |
| C | 2.03289900  | -3.93876300 | -1.23781500 |
| C | 2.56971900  | -3.93704800 | -2.52477900 |
| C | 3.77628600  | -3.28908500 | -2.79186000 |
| C | 4.48855500  | -2.66776000 | -1.76636700 |
| C | 4.62610000  | -2.22394900 | 0.79265200  |
| C | 3.86373700  | -3.03690100 | 1.85799000  |
| C | 2.44331700  | -3.28889200 | 1.26319100  |
| H | 1.10439100  | -4.45943300 | -1.03030800 |
| H | 2.05159800  | -4.45739300 | -3.32402200 |
| H | 4.18092000  | -3.30084100 | -3.79884400 |
| H | 5.45423800  | -2.21155600 | -1.96233600 |
| H | 4.48670600  | -1.14724200 | 0.91786700  |
| H | 4.32753600  | -4.02185600 | 1.94711600  |
| H | 5.69652700  | -2.43750300 | 0.82377400  |
| H | 2.00181400  | -4.22313900 | 1.61428500  |
| N | 1.53353300  | -2.21121800 | 1.76709400  |
| O | 3.86534000  | -2.51031600 | 3.16436100  |
| C | 0.22729100  | -2.01205400 | 1.52685800  |
| C | 1.88327900  | -1.30206700 | 2.73138100  |
| N | -0.16191700 | -1.04082200 | 2.34691000  |
| N | 0.86356900  | -0.57713600 | 3.09844200  |
| C | 3.27369000  | -1.23790000 | 3.27076400  |
| H | 3.83348300  | -0.46517000 | 2.72929800  |
| H | 3.24044700  | -0.97388800 | 4.32817600  |
| C | -1.47948000 | -0.49976000 | 2.50605800  |
| C | -1.64069900 | 0.88153600  | 2.48349100  |
| C | -2.55117800 | -1.36716600 | 2.69589400  |
| C | -2.91608100 | 1.40617500  | 2.65081600  |
| C | -3.82694300 | -0.83851800 | 2.85555700  |
| C | -3.99482400 | 0.54321300  | 2.83528200  |
| H | -3.07556000 | 2.47804800  | 2.63968500  |
| H | -4.68029900 | -1.49056400 | 3.00025500  |
| H | -2.39397800 | -2.44047800 | 2.73507300  |
| H | -0.78183200 | 1.52121000  | 2.31947900  |

|    |             |             |             |
|----|-------------|-------------|-------------|
| Cl | -5.58380600 | 1.21022200  | 3.04760000  |
| H  | -2.16698500 | -1.93129100 | -3.60520000 |
| H  | 1.87890200  | -1.27422300 | -2.59165500 |
| C  | -0.98051800 | 2.29449100  | -2.34788500 |
| C  | -0.21176900 | 3.23536000  | -3.04139700 |
| C  | -1.98736000 | 2.73824300  | -1.48614800 |
| C  | -0.44740100 | 4.59482100  | -2.87442500 |
| H  | 0.56723300  | 2.89641600  | -3.71749900 |
| C  | -2.22556300 | 4.10121800  | -1.32115900 |
| H  | -2.56769700 | 2.00522200  | -0.93253400 |
| C  | -1.45243300 | 5.03176800  | -2.01086600 |
| H  | 0.15185400  | 5.31627900  | -3.41997300 |
| H  | -3.01004700 | 4.43476100  | -0.64950600 |
| H  | -1.63423500 | 6.09381900  | -1.88139800 |

Variable frequencies

|          |          |          |
|----------|----------|----------|
| 12.9237  | 17.5814  | 23.0341  |
| 27.0225  | 34.4937  | 36.9783  |
| 40.1194  | 47.9562  | 57.1543  |
| 58.2015  | 68.1160  | 71.6069  |
| 74.9437  | 78.5745  | 82.7616  |
| 90.8068  | 98.6460  | 100.5009 |
| 104.2165 | 108.8328 | 114.4829 |
| 116.8182 | 135.5336 | 145.6677 |
| 151.0664 | 158.8292 | 171.8627 |
| 187.6775 | 190.0963 | 203.3365 |
| 204.7139 | 211.7052 | 218.7173 |
| 229.2416 | 232.8815 | 238.2944 |
| 256.5329 | 265.3349 | 267.2675 |
| 285.4880 | 287.4181 | 297.8140 |
| 302.3868 | 311.2202 | 322.2943 |
| 327.5236 | 341.0339 | 350.1908 |
| 356.0080 | 360.5686 | 367.7622 |
| 385.1346 | 396.8401 | 407.4526 |
| 415.8087 | 418.9787 | 424.1607 |
| 425.3614 | 428.8513 | 442.5753 |
| 453.1674 | 460.3865 | 463.9986 |
| 478.4542 | 486.2406 | 495.6658 |
| 500.6674 | 513.7361 | 526.9479 |
| 532.2078 | 537.4038 | 549.0506 |
| 554.4743 | 565.6566 | 573.7802 |
| 590.6068 | 607.7003 | 613.8421 |
| 620.4452 | 625.5594 | 628.3148 |
| 629.2687 | 638.1360 | 641.6685 |



|           |           |           |
|-----------|-----------|-----------|
| 642.3468  | 651.3283  | 656.9518  |
| 672.2917  | 683.7406  | 704.9270  |
| 705.5879  | 717.1421  | 719.6767  |
| 722.6208  | 726.0593  | 730.9389  |
| 745.5280  | 757.7633  | 763.2635  |
| 769.9743  | 783.5839  | 786.7910  |
| 792.2686  | 804.0901  | 810.7174  |
| 820.6148  | 837.7418  | 839.6869  |
| 841.2523  | 843.6697  | 848.0250  |
| 861.1995  | 866.8369  | 867.5970  |
| 877.5664  | 881.2702  | 886.9351  |
| 888.4607  | 895.7065  | 906.3216  |
| 914.0290  | 921.9883  | 952.7247  |
| 958.3150  | 975.4010  | 976.4296  |
| 984.0424  | 986.4309  | 989.1337  |
| 994.7014  | 1000.7733 | 1002.8481 |
| 1006.0777 | 1006.4577 | 1014.6746 |
| 1017.6413 | 1020.1682 | 1024.5745 |
| 1026.0115 | 1026.8157 | 1032.2385 |
| 1035.3574 | 1037.1456 | 1040.8502 |
| 1055.2851 | 1064.6891 | 1065.5078 |
| 1071.3394 | 1073.8063 | 1075.4077 |
| 1078.2549 | 1095.5812 | 1107.4822 |
| 1112.2790 | 1117.0496 | 1119.6410 |
| 1129.5623 | 1132.6490 | 1136.1180 |
| 1138.4556 | 1141.5956 | 1149.0383 |
| 1164.2426 | 1165.7303 | 1170.1735 |
| 1177.3657 | 1180.6098 | 1183.5276 |
| 1187.3236 | 1197.1490 | 1199.5528 |
| 1203.9452 | 1205.0575 | 1209.8024 |
| 1212.5760 | 1222.6693 | 1224.0828 |
| 1225.4314 | 1238.0436 | 1246.8518 |
| 1253.7960 | 1259.7076 | 1261.3536 |
| 1280.8394 | 1289.2381 | 1294.8139 |
| 1303.9235 | 1310.3937 | 1316.9710 |
| 1318.7623 | 1326.0150 | 1327.8266 |
| 1331.6680 | 1336.3763 | 1338.6015 |
| 1343.8333 | 1352.1609 | 1359.0738 |
| 1360.0069 | 1360.1779 | 1360.6552 |
| 1367.1191 | 1368.2061 | 1372.1216 |
| 1377.4810 | 1383.0200 | 1421.9607 |
| 1424.2195 | 1431.3872 | 1443.5607 |
| 1450.1736 | 1452.6410 | 1454.4432 |
| 1461.6303 | 1487.4818 | 1498.8515 |

|           |           |           |
|-----------|-----------|-----------|
| 1499.5926 | 1500.0134 | 1501.7342 |
| 1504.5740 | 1505.3821 | 1515.1769 |
| 1520.4146 | 1521.9672 | 1536.8601 |
| 1539.5950 | 1547.7143 | 1552.2424 |
| 1552.2798 | 1556.9269 | 1606.9377 |
| 1629.2091 | 1665.1191 | 1668.0783 |
| 1671.8752 | 1677.6172 | 1677.9528 |
| 1681.1956 | 1684.7889 | 1687.9422 |
| 1696.3066 | 1698.4241 | 1701.9439 |
| 1725.5617 | 1773.7775 | 3064.9309 |
| 3066.7129 | 3077.8981 | 3083.6458 |
| 3105.4668 | 3114.5236 | 3146.8334 |
| 3152.7258 | 3154.7230 | 3157.3566 |
| 3166.8677 | 3178.4333 | 3182.9639 |
| 3183.1333 | 3199.0375 | 3199.4423 |
| 3201.2172 | 3205.2065 | 3207.4970 |
| 3209.5376 | 3210.7426 | 3212.6548 |
| 3213.0019 | 3219.3817 | 3219.4190 |
| 3221.2550 | 3222.0726 | 3228.0756 |
| 3228.6499 | 3229.1502 | 3229.3578 |
| 3233.6882 | 3235.2155 | 3235.9175 |
| 3238.1876 | 3239.9971 | 3241.2496 |
| 3241.9405 | 3245.8031 | 3252.9634 |

## **<sup>2</sup>TS6R**

Zero-point correction=0.776643

Thermal correction to Energy=0.823573

Thermal correction to Enthalpy=0.824517

Thermal correction to Gibbs Free Energy=0.691592

Sum of electronic and zero-point Energies=-3207.923097

Sum of electronic and thermal Energies=-3207.876167

Sum of electronic and thermal Enthalpies=-3207.875223

Sum of electronic and thermal Free Energies=-3208.008148

### Cartesian coordinate

|   |             |             |             |
|---|-------------|-------------|-------------|
| N | 2.38153800  | -1.73526700 | -1.00395200 |
| N | 3.75288200  | -1.76672400 | -1.24004500 |
| C | 4.17417500  | -2.68109400 | -2.30524400 |
| C | 1.76996000  | -0.49644500 | -0.89178300 |
| C | 0.46807000  | -0.44714200 | -0.49578300 |
| C | -0.32759200 | -1.62096500 | -0.16424200 |
| C | 0.43575200  | -2.86306100 | -0.22062600 |
| C | 1.72446000  | -2.89123600 | -0.62569200 |

|   |             |             |             |
|---|-------------|-------------|-------------|
| C | -1.20021800 | -1.43019900 | 1.16618500  |
| C | -2.29263700 | -0.44944800 | 0.90312500  |
| C | -2.92363800 | -0.45315500 | -0.29904100 |
| O | -2.73136600 | -1.27870800 | -1.27994000 |
| S | 4.63948000  | -1.91941200 | 0.24467300  |
| O | 3.87657100  | -1.12543600 | 1.19108300  |
| C | 6.13709800  | -1.10669400 | -0.20829100 |
| O | 4.90648200  | -3.33046000 | 0.48905500  |
| C | 7.30083400  | -1.85372500 | -0.36046700 |
| C | 8.46761100  | -1.19083200 | -0.72363700 |
| C | 8.47563000  | 0.19195100  | -0.93420900 |
| C | 7.28347100  | 0.90955200  | -0.77503100 |
| C | 6.10732800  | 0.27216500  | -0.40761800 |
| C | 2.55902000  | 0.72939900  | -1.15810500 |
| C | 2.62444100  | 1.70798700  | -0.16209000 |
| C | 3.33932200  | 2.88392300  | -0.38870000 |
| C | 3.98270100  | 3.08564300  | -1.60766800 |
| C | 3.91635600  | 2.10919600  | -2.60232700 |
| C | 3.21091400  | 0.93311900  | -2.37840800 |
| C | 9.75288600  | 0.90045800  | -1.29652400 |
| H | 3.61988100  | -2.42186600 | -3.20798000 |
| H | 5.23754200  | -2.50749200 | -2.48153400 |
| H | 4.02349900  | -3.73627400 | -2.05619500 |
| H | 0.00898400  | 0.53269600  | -0.40347500 |
| H | -0.03265000 | -3.79615600 | 0.07589900  |
| H | 2.32299900  | -3.79340400 | -0.65597000 |
| H | -1.62085200 | -2.42935100 | 1.35164700  |
| H | 7.28358100  | -2.92537400 | -0.19205300 |
| H | 9.38746500  | -1.75488300 | -0.84491700 |
| H | 7.27726300  | 1.98306400  | -0.93999700 |
| H | 5.18457000  | 0.82976600  | -0.27397800 |
| H | 2.14186600  | 1.52730800  | 0.79601200  |
| H | 3.39709600  | 3.63567500  | 0.39162800  |
| H | 4.53707700  | 4.00178000  | -1.78371200 |
| H | 4.41463700  | 2.26525400  | -3.55319200 |
| H | 3.15863100  | 0.17206600  | -3.15121700 |
| H | 9.55266600  | 1.82591500  | -1.83997900 |
| H | 10.31121400 | 1.16000200  | -0.39144700 |
| H | 10.39603200 | 0.26709700  | -1.91095100 |
| C | -0.28842200 | -1.03411200 | 2.30740900  |
| C | 0.33343800  | -2.00999400 | 3.08575500  |
| C | 0.01809300  | 0.31045700  | 2.53998800  |
| C | 1.24148400  | -1.65320700 | 4.07924500  |
| H | 0.10648500  | -3.05918600 | 2.91196900  |

|    |             |             |             |
|----|-------------|-------------|-------------|
| C  | 0.92467600  | 0.67045500  | 3.53246100  |
| H  | -0.45255700 | 1.08576200  | 1.93704900  |
| C  | 1.54094200  | -0.31250800 | 4.30376300  |
| H  | 1.71733500  | -2.42435100 | 4.67601100  |
| H  | 1.14870800  | 1.71985800  | 3.70164100  |
| H  | 2.25067600  | -0.03472400 | 5.07580900  |
| H  | -2.53395600 | 0.29695000  | 1.64968900  |
| C  | -7.30399600 | -1.69055400 | -0.06784000 |
| C  | -5.97981400 | -1.79034800 | -0.50461900 |
| C  | -5.10754700 | -2.72554200 | 0.04592400  |
| C  | -5.57849100 | -3.54518000 | 1.06933600  |
| C  | -6.89448600 | -3.43653300 | 1.52089000  |
| C  | -7.76959300 | -2.51402200 | 0.95061800  |
| C  | -8.05954100 | -0.64786200 | -0.85063300 |
| C  | -7.17206200 | -0.47705100 | -2.10209400 |
| C  | -5.73088100 | -0.82005100 | -1.63727700 |
| H  | -4.09336800 | -2.81207200 | -0.32934400 |
| H  | -4.91839000 | -4.28398400 | 1.51171300  |
| H  | -7.24521100 | -4.08872900 | 2.31416100  |
| H  | -8.79928300 | -2.44792300 | 1.28810300  |
| H  | -8.13694300 | 0.28053600  | -0.27252300 |
| H  | -7.45147300 | -1.23326800 | -2.83883100 |
| H  | -9.07515500 | -0.94970700 | -1.11473800 |
| H  | -5.08865800 | -1.20853800 | -2.42819200 |
| N  | -5.10421500 | 0.45254600  | -1.17913200 |
| O  | -7.26666200 | 0.75590200  | -2.78330500 |
| C  | -3.91969700 | 0.61746100  | -0.56818500 |
| C  | -5.66714200 | 1.69612400  | -1.30224100 |
| N  | -3.81544900 | 1.92768500  | -0.33657200 |
| N  | -4.90116500 | 2.61565800  | -0.78608100 |
| C  | -6.98314800 | 1.88584800  | -1.99412700 |
| H  | -7.76988600 | 2.08986400  | -1.25791900 |
| H  | -6.91484300 | 2.74392500  | -2.66474300 |
| C  | -2.68663100 | 2.62269400  | 0.21747700  |
| C  | -2.77025900 | 3.13649900  | 1.50481800  |
| C  | -1.53581300 | 2.74770200  | -0.55214000 |
| C  | -1.65761500 | 3.76587500  | 2.05311900  |
| C  | -0.42318100 | 3.37853600  | -0.00722600 |
| C  | -0.49407000 | 3.86842700  | 1.29523200  |
| H  | -1.68825100 | 4.16390400  | 3.06050200  |
| H  | 0.49128500  | 3.48414900  | -0.58080600 |
| H  | -1.50730900 | 2.35078700  | -1.56238100 |
| H  | -3.68731200 | 3.03087000  | 2.07440300  |
| Cl | 0.90983700  | 4.61818900  | 1.99393700  |

H        -1.26076200    -1.66129700    -0.90736600

Variable frequencies

|           |          |          |
|-----------|----------|----------|
| -168.1004 | 11.2981  | 18.0133  |
| 19.9211   | 22.9352  | 24.1265  |
| 27.9744   | 30.6688  | 38.5517  |
| 41.9300   | 51.0200  | 56.9896  |
| 60.5368   | 64.6032  | 69.1763  |
| 72.5758   | 75.3015  | 77.8517  |
| 81.4022   | 93.8061  | 106.2163 |
| 111.9648  | 129.3354 | 139.2852 |
| 147.5736  | 149.2315 | 154.4771 |
| 168.6682  | 178.2654 | 182.5301 |
| 190.4679  | 208.0452 | 212.8093 |
| 221.6918  | 232.2381 | 243.2320 |
| 250.9147  | 258.5366 | 259.6209 |
| 279.6210  | 285.6934 | 299.2340 |
| 305.5171  | 310.4730 | 316.4383 |
| 328.7862  | 336.3260 | 343.9588 |
| 347.8567  | 355.5812 | 371.2743 |
| 377.5006  | 386.0893 | 405.9051 |
| 416.8759  | 418.0051 | 420.0780 |
| 425.9452  | 437.3158 | 441.8049 |
| 446.0926  | 461.1103 | 466.3392 |
| 472.1506  | 490.4931 | 495.2375 |
| 508.7100  | 517.6739 | 524.8581 |
| 535.2215  | 545.5501 | 558.8375 |
| 563.7759  | 576.1522 | 583.8702 |
| 591.3931  | 605.9439 | 608.4792 |
| 617.3848  | 626.3324 | 629.9209 |
| 639.1213  | 642.5388 | 642.9262 |
| 649.0580  | 656.3302 | 660.7130 |
| 678.5130  | 695.4608 | 705.3404 |
| 707.6103  | 717.9919 | 721.4859 |
| 726.8295  | 728.4125 | 734.8781 |
| 747.8180  | 758.2923 | 765.6376 |
| 781.9975  | 785.1162 | 790.9382 |
| 791.1034  | 802.2604 | 813.3162 |
| 814.3664  | 825.0265 | 834.3846 |
| 840.1813  | 846.6775 | 849.3760 |
| 852.9017  | 853.3616 | 863.0384 |
| 865.2427  | 876.3449 | 887.5398 |
| 889.2601  | 902.5904 | 915.2937 |
| 924.2874  | 936.3959 | 952.6621 |

|           |           |           |
|-----------|-----------|-----------|
| 969.3712  | 975.0746  | 979.5977  |
| 984.3242  | 989.9431  | 994.9193  |
| 1000.7436 | 1002.0858 | 1006.1075 |
| 1010.1967 | 1013.4781 | 1016.4867 |
| 1017.5522 | 1022.8439 | 1026.1479 |
| 1027.2741 | 1032.6563 | 1032.8462 |
| 1035.5429 | 1039.1575 | 1040.3998 |
| 1052.7572 | 1060.5767 | 1063.8500 |
| 1071.9479 | 1074.1809 | 1076.8321 |
| 1085.8190 | 1098.0683 | 1101.4041 |
| 1116.6526 | 1118.0869 | 1119.8968 |
| 1129.7186 | 1131.1531 | 1132.3187 |
| 1133.7280 | 1144.1833 | 1147.0041 |
| 1155.3293 | 1158.2534 | 1166.1741 |
| 1176.7262 | 1177.5459 | 1180.8589 |
| 1184.2817 | 1185.8074 | 1187.4324 |
| 1196.5788 | 1197.2616 | 1201.3398 |
| 1208.4166 | 1211.1945 | 1213.2434 |
| 1216.8989 | 1220.5479 | 1229.9323 |
| 1241.1944 | 1253.4461 | 1255.1170 |
| 1263.2013 | 1279.9154 | 1290.7468 |
| 1296.7532 | 1304.1172 | 1305.4620 |
| 1315.7916 | 1317.2565 | 1329.5035 |
| 1329.5950 | 1335.8989 | 1339.9955 |
| 1341.8318 | 1354.7290 | 1356.3571 |
| 1358.1707 | 1359.2469 | 1361.3215 |
| 1364.7230 | 1368.9677 | 1376.3009 |
| 1380.8126 | 1384.6910 | 1421.2638 |
| 1427.9560 | 1429.5757 | 1455.0287 |
| 1455.3679 | 1457.2695 | 1458.6898 |
| 1467.6777 | 1475.0368 | 1494.7320 |
| 1495.4082 | 1502.0905 | 1504.3061 |
| 1506.7836 | 1507.2709 | 1508.9003 |
| 1513.6734 | 1520.2813 | 1524.5557 |
| 1542.6618 | 1543.4708 | 1545.6607 |
| 1549.6151 | 1554.0315 | 1594.4987 |
| 1608.7757 | 1648.7398 | 1666.9724 |
| 1670.5618 | 1670.7505 | 1678.1718 |
| 1679.1635 | 1681.4692 | 1688.5068 |
| 1690.2043 | 1693.8276 | 1699.7225 |
| 1705.2299 | 1736.2924 | 1875.4782 |
| 3051.4922 | 3076.8721 | 3077.6530 |
| 3078.9524 | 3095.5676 | 3144.9764 |
| 3150.9036 | 3156.7695 | 3164.4981 |

|           |           |           |
|-----------|-----------|-----------|
| 3169.2764 | 3170.3282 | 3175.9129 |
| 3178.0933 | 3192.8822 | 3193.3620 |
| 3203.4166 | 3205.1149 | 3205.5083 |
| 3206.1144 | 3207.1342 | 3209.5820 |
| 3214.6887 | 3215.4701 | 3216.5811 |
| 3217.0331 | 3219.7078 | 3224.8850 |
| 3224.9658 | 3226.2576 | 3226.5807 |
| 3228.3259 | 3230.3637 | 3233.1720 |
| 3233.7723 | 3235.6928 | 3238.0160 |
| 3240.3851 | 3243.0689 | 3273.6853 |

## <sup>2</sup>TS6R<sup>1</sup>

Zero-point correction=0.774834

Thermal correction to Energy=0.822357

Thermal correction to Enthalpy=0.823301

Thermal correction to Gibbs Free Energy=0.689003

Sum of electronic and zero-point Energies=-3207.898966

Sum of electronic and thermal Energies=-3207.851443

Sum of electronic and thermal Enthalpies=-3207.850499

Sum of electronic and thermal Free Energies=-3207.984797

### Cartesian coordinate

|   |            |             |             |
|---|------------|-------------|-------------|
| C | 7.21771800 | 1.14663800  | 0.33448900  |
| C | 6.21872800 | 0.99653800  | -0.63353900 |
| C | 5.39715600 | 2.06177500  | -0.99326000 |
| C | 5.57128400 | 3.28127500  | -0.33952200 |
| C | 6.54939000 | 3.42660700  | 0.64532800  |
| C | 7.38600500 | 2.36371800  | 0.98361000  |
| C | 8.01735700 | -0.12163400 | 0.49036700  |
| C | 7.70167900 | -0.85719400 | -0.82983500 |
| C | 6.26855700 | -0.40026900 | -1.20851400 |
| H | 4.65054800 | 1.94762600  | -1.77246300 |
| H | 4.94150400 | 4.12476900  | -0.60308900 |
| H | 6.67395100 | 4.38519800  | 1.13864200  |
| H | 8.16424800 | 2.49000400  | 1.72966800  |
| H | 7.67203700 | -0.68833100 | 1.36384500  |
| H | 8.36794400 | -0.48470100 | -1.61066400 |
| H | 9.08859600 | 0.04796100  | 0.61480200  |
| H | 6.04675200 | -0.46521000 | -2.27461400 |
| N | 5.33148900 | -1.33539600 | -0.52205800 |
| O | 7.86490400 | -2.25817900 | -0.83703500 |
| C | 3.99934000 | -1.22453100 | -0.39175900 |
| C | 5.69826500 | -2.49125800 | 0.11575300  |

|    |              |             |             |
|----|--------------|-------------|-------------|
| N  | 3.61323200   | -2.29517700 | 0.30353200  |
| N  | 4.66526400   | -3.09283200 | 0.63569200  |
| C  | 7.12644900   | -2.94583900 | 0.14319800  |
| H  | 7.54189000   | -2.81088000 | 1.14948400  |
| H  | 7.16806900   | -4.00829900 | -0.10250800 |
| C  | 1.33401900   | 1.58848000  | -0.78064500 |
| C  | 2.23689400   | 0.52165700  | -0.18596100 |
| C  | 3.16689400   | -0.14772900 | -1.01681500 |
| O  | 3.34596500   | 0.02916400  | -2.23890700 |
| H  | 2.33227000   | 0.46823500  | 0.89773000  |
| C  | 2.27381800   | -2.69589200 | 0.61461400  |
| C  | 1.31062900   | -2.67789000 | -0.39028600 |
| C  | 1.97772500   | -3.09864300 | 1.91060700  |
| C  | 0.00490900   | -3.03470800 | -0.07803800 |
| H  | 1.57474300   | -2.38886800 | -1.40401800 |
| C  | 0.67517700   | -3.47400000 | 2.21698700  |
| H  | 2.75562000   | -3.11926000 | 2.66589200  |
| C  | -0.29759400  | -3.42819400 | 1.22246400  |
| H  | -0.76647100  | -3.02138000 | -0.84058900 |
| H  | 0.41441700   | -3.79181300 | 3.21948800  |
| Cl | -1.92795900  | -3.89208500 | 1.60906200  |
| S  | -4.67855200  | 0.32617500  | -1.92913300 |
| O  | -4.73462400  | -0.14930400 | -3.30624800 |
| O  | -4.05691700  | 1.59922600  | -1.60335500 |
| N  | -3.80924900  | -0.82083000 | -0.97232200 |
| N  | -2.46962200  | -0.47512300 | -0.82201900 |
| C  | -7.31032600  | -0.40635500 | -1.91155300 |
| H  | -7.12727300  | -0.79844600 | -2.90660900 |
| C  | -8.56417500  | -0.49313200 | -1.31478700 |
| H  | -9.37960300  | -0.96794100 | -1.85173600 |
| C  | -6.28239900  | 0.20791200  | -1.20441500 |
| C  | -6.47248500  | 0.73586800  | 0.07198700  |
| H  | -5.65336700  | 1.21941500  | 0.59626600  |
| C  | -8.79071800  | 0.02302900  | -0.03604000 |
| C  | -7.73010200  | 0.63407400  | 0.64659200  |
| H  | -7.89349900  | 1.03730200  | 1.64207200  |
| C  | -10.15622400 | -0.04629600 | 0.59274000  |
| H  | -10.08636400 | -0.25595800 | 1.66260700  |
| H  | -10.77143000 | -0.81762100 | 0.12595200  |
| H  | -10.67449500 | 0.91104000  | 0.47818900  |
| C  | -1.65737600  | -0.46054500 | -1.94857500 |
| H  | -2.10394400  | -0.88904300 | -2.83943300 |
| C  | -2.11276500  | 0.27898900  | 0.29842400  |
| C  | -0.88233200  | 0.84976300  | 0.34967700  |



|   |             |             |             |
|---|-------------|-------------|-------------|
| H | -0.62355900 | 1.43248300  | 1.22651100  |
| C | -0.43162100 | 0.09971600  | -1.93965800 |
| H | 0.16364600  | 0.10918600  | -2.84605400 |
| C | 0.10086300  | 0.67694000  | -0.70963500 |
| C | -4.03875100 | -2.22124600 | -1.32778400 |
| H | -5.11609000 | -2.39840100 | -1.31624100 |
| H | -3.64806200 | -2.48184900 | -2.31773100 |
| H | -3.57016800 | -2.84005100 | -0.56028000 |
| C | -3.11186300 | 0.49174400  | 1.37220000  |
| C | -3.82609000 | -0.56699300 | 1.94286300  |
| C | -3.32659600 | 1.79479500  | 1.83095900  |
| C | -4.74010500 | -0.32278100 | 2.96058600  |
| H | -3.65996300 | -1.58017500 | 1.59200100  |
| C | -4.24661300 | 2.03613000  | 2.84894000  |
| H | -2.79171000 | 2.61758900  | 1.36576100  |
| C | -4.95519300 | 0.97882400  | 3.41336800  |
| H | -5.28755400 | -1.14947600 | 3.40102200  |
| H | -4.41410200 | 3.05143500  | 3.19246900  |
| H | -5.67400700 | 1.16619200  | 4.20448500  |
| C | 1.25489400  | 2.91556800  | -0.07012200 |
| C | 0.16209700  | 3.75753500  | -0.30486300 |
| C | 2.26782700  | 3.34025800  | 0.78804100  |
| C | 0.08884600  | 5.00234600  | 0.31029000  |
| H | -0.63333900 | 3.43171500  | -0.97140200 |
| C | 2.19945400  | 4.59255800  | 1.39715500  |
| H | 3.12680300  | 2.69928800  | 0.96884600  |
| C | 1.10922600  | 5.42395800  | 1.16257800  |
| H | -0.76313300 | 5.64707600  | 0.12006800  |
| H | 3.00031600  | 4.91392200  | 2.05586700  |
| H | 1.05209200  | 6.39703100  | 1.63911900  |
| H | 1.61576300  | 1.73913400  | -1.82864700 |
| H | 0.95538800  | -0.23339700 | -0.25729800 |

Variable frequencies

|            |          |          |
|------------|----------|----------|
| -1074.8191 | 11.6637  | 15.0540  |
| 18.6237    | 23.8945  | 26.8761  |
| 31.9149    | 34.1930  | 36.9868  |
| 43.6985    | 46.5154  | 55.6504  |
| 58.5209    | 62.6666  | 65.3768  |
| 67.0377    | 73.0848  | 79.4191  |
| 88.7190    | 92.2932  | 96.7778  |
| 108.1570   | 120.5817 | 132.6523 |
| 139.1455   | 145.8251 | 151.8537 |
| 155.3012   | 172.1171 | 180.2823 |

|           |           |           |
|-----------|-----------|-----------|
| 184.4028  | 204.1843  | 212.9994  |
| 220.1468  | 226.6096  | 238.0719  |
| 245.1908  | 251.3494  | 263.0709  |
| 265.4106  | 278.6461  | 287.5528  |
| 288.5341  | 307.6268  | 311.0315  |
| 319.0229  | 329.6662  | 336.4313  |
| 344.9035  | 356.0697  | 363.9658  |
| 369.7383  | 385.2139  | 389.0020  |
| 405.6195  | 414.0048  | 415.6424  |
| 421.8957  | 423.2011  | 439.4309  |
| 439.9045  | 449.1381  | 461.0979  |
| 461.3517  | 468.7132  | 486.9993  |
| 491.0268  | 497.1990  | 511.0390  |
| 525.4936  | 531.0785  | 540.9751  |
| 553.6295  | 558.9601  | 575.9177  |
| 586.5698  | 589.9964  | 605.8233  |
| 611.9808  | 618.7499  | 626.3174  |
| 629.2217  | 640.2368  | 642.9870  |
| 647.6196  | 653.0548  | 654.3960  |
| 661.5157  | 680.2126  | 693.2704  |
| 706.0905  | 709.1199  | 716.3391  |
| 718.8501  | 724.9015  | 727.4170  |
| 729.4438  | 735.5440  | 758.5107  |
| 772.0466  | 780.0756  | 784.9894  |
| 787.5837  | 800.5730  | 810.2504  |
| 813.4273  | 823.9630  | 837.3245  |
| 840.3114  | 841.1030  | 843.6868  |
| 851.6669  | 853.3999  | 856.8635  |
| 869.3182  | 876.2270  | 885.4221  |
| 887.7098  | 891.6885  | 904.3907  |
| 913.8846  | 935.3852  | 951.5134  |
| 961.3518  | 963.9913  | 974.8317  |
| 976.9501  | 986.6437  | 990.3495  |
| 992.4327  | 1003.0390 | 1005.1211 |
| 1009.1889 | 1014.1473 | 1015.9809 |
| 1016.8280 | 1018.6398 | 1024.7994 |
| 1027.8038 | 1031.8157 | 1033.2473 |
| 1033.7160 | 1042.7937 | 1043.2880 |
| 1058.1194 | 1059.7623 | 1066.5005 |
| 1069.3497 | 1071.2708 | 1073.7422 |
| 1090.5324 | 1099.7574 | 1103.5985 |
| 1118.0637 | 1119.9870 | 1122.1243 |
| 1131.7511 | 1133.4313 | 1135.2117 |
| 1137.0784 | 1140.0550 | 1142.3053 |

|           |           |           |
|-----------|-----------|-----------|
| 1156.8559 | 1160.7326 | 1165.9327 |
| 1178.3749 | 1179.8132 | 1183.1337 |
| 1184.4063 | 1190.9567 | 1193.1272 |
| 1199.2507 | 1201.7134 | 1203.2570 |
| 1208.5747 | 1211.2225 | 1212.7548 |
| 1221.2252 | 1226.2341 | 1241.0142 |
| 1246.5080 | 1250.2964 | 1254.8455 |
| 1266.2039 | 1277.2006 | 1282.7357 |
| 1297.9002 | 1301.8209 | 1304.3435 |
| 1319.6755 | 1329.5564 | 1330.7674 |
| 1332.7746 | 1339.0306 | 1341.7134 |
| 1344.4429 | 1346.8030 | 1356.3855 |
| 1357.1492 | 1360.1880 | 1362.0327 |
| 1363.4715 | 1367.5911 | 1374.3778 |
| 1377.0934 | 1382.0779 | 1420.5536 |
| 1422.5358 | 1444.4369 | 1450.7329 |
| 1453.3115 | 1455.5703 | 1459.9676 |
| 1465.0253 | 1471.8836 | 1490.3148 |
| 1498.2589 | 1498.3273 | 1499.9954 |
| 1503.8396 | 1505.2554 | 1508.0700 |
| 1509.9984 | 1520.4048 | 1525.1558 |
| 1540.0966 | 1542.2946 | 1547.6287 |
| 1550.6604 | 1552.2933 | 1581.3658 |
| 1635.0037 | 1643.7901 | 1666.4918 |
| 1666.8342 | 1671.8151 | 1676.7154 |
| 1679.3282 | 1683.9365 | 1686.1237 |
| 1690.5799 | 1695.4211 | 1697.9249 |
| 1703.5680 | 1710.1483 | 1744.4023 |
| 3065.3738 | 3072.6899 | 3074.6532 |
| 3086.5729 | 3102.1538 | 3145.2505 |
| 3147.6317 | 3153.7880 | 3156.3880 |
| 3165.0249 | 3168.4709 | 3170.8873 |
| 3182.1057 | 3188.4685 | 3193.5476 |
| 3196.4517 | 3208.1834 | 3208.6102 |
| 3213.9936 | 3214.4131 | 3215.7776 |
| 3219.0667 | 3219.6036 | 3222.6584 |
| 3224.1075 | 3227.3272 | 3228.5803 |
| 3230.1915 | 3230.5525 | 3231.9520 |
| 3234.0139 | 3234.4874 | 3238.1014 |
| 3239.0111 | 3244.4888 | 3245.0264 |
| 3248.2080 | 3250.8961 | 3251.9037 |

**<sup>2</sup>TS6S**

Zero-point correction=0.775827  
 Thermal correction to Energy=0.823129  
 Thermal correction to Enthalpy=0.824073  
 Thermal correction to Gibbs Free Energy=0.688339  
 Sum of electronic and zero-point Energies=-3207.916941  
 Sum of electronic and thermal Energies=-3207.869639  
 Sum of electronic and thermal Enthalpies=-3207.868695  
 Sum of electronic and thermal Free Energies=-3208.004428

Cartesian coordinate

|   |             |             |             |
|---|-------------|-------------|-------------|
| N | 2.57579400  | 0.93858900  | 0.11827000  |
| N | 3.87545800  | 1.24069500  | -0.27777800 |
| C | 2.40000000  | 0.20845300  | 1.28372900  |
| C | 1.15076500  | -0.24849200 | 1.58451700  |
| C | -0.01645400 | -0.03151300 | 0.74389700  |
| C | 0.29273300  | 0.65737600  | -0.50327900 |
| C | 1.53429400  | 1.11479100  | -0.77501800 |
| C | -0.94202900 | -1.32372600 | 0.56590000  |
| C | -2.30964200 | -0.90693300 | 0.13791400  |
| C | -2.89034900 | 0.11764400  | 0.81789700  |
| O | -2.31743000 | 0.80976100  | 1.75867700  |
| S | 4.46346500  | 0.08920700  | -1.43397800 |
| O | 4.21459400  | 0.60161800  | -2.77528900 |
| C | 6.19011600  | 0.16470000  | -1.08661500 |
| O | 3.89008600  | -1.17116200 | -0.99770300 |
| C | 6.64057500  | -0.31533600 | 0.14336500  |
| C | 7.99701700  | -0.24717900 | 0.41805100  |
| C | 8.89915400  | 0.28500500  | -0.51485900 |
| C | 8.41203800  | 0.74938500  | -1.73916900 |
| C | 7.05353100  | 0.69700800  | -2.03694800 |
| C | 3.57823800  | -0.08360500 | 2.13334200  |
| C | 4.39801900  | 0.93307500  | 2.63273900  |
| C | 5.48828200  | 0.61619400  | 3.43358400  |
| C | 5.76975200  | -0.71634200 | 3.73790600  |
| C | 4.95507500  | -1.73110200 | 3.24311300  |
| C | 3.85950700  | -1.41688500 | 2.44116300  |
| C | 10.36559900 | 0.36149500  | -0.18557100 |
| H | 1.03638500  | -0.80233900 | 2.51189100  |
| H | -0.87278800 | 0.57183400  | 1.35630800  |
| H | -0.48761400 | 0.79435000  | -1.24566200 |
| H | 1.80376300  | 1.59862000  | -1.70644500 |
| H | -1.00858400 | -1.72142400 | 1.58893300  |
| H | 5.94106900  | -0.73469300 | 0.86072900  |
| H | 8.36630400  | -0.61551000 | 1.37104300  |

|   |             |             |             |
|---|-------------|-------------|-------------|
| H | 9.10379400  | 1.15588500  | -2.47030500 |
| H | 6.66503100  | 1.05321300  | -2.98522800 |
| H | 4.17828600  | 1.96997400  | 2.39727600  |
| H | 6.12002600  | 1.40812400  | 3.82146700  |
| H | 6.62378200  | -0.96164800 | 4.36073100  |
| H | 5.17514200  | -2.76852000 | 3.47134400  |
| H | 3.23826600  | -2.20076600 | 2.01800400  |
| H | 10.95827400 | 0.62223400  | -1.06374100 |
| H | 10.72743800 | -0.59278000 | 0.20539200  |
| H | 10.54585000 | 1.11963500  | 0.58284300  |
| C | -0.25294200 | -2.33550600 | -0.31764100 |
| C | 0.58077400  | -3.29739600 | 0.25661400  |
| C | -0.36879300 | -2.28726200 | -1.70813100 |
| C | 1.28458600  | -4.19476200 | -0.54042300 |
| H | 0.67225400  | -3.34794400 | 1.33962400  |
| C | 0.33300400  | -3.18444300 | -2.50811100 |
| H | -1.00998400 | -1.54164900 | -2.17207200 |
| C | 1.16291200  | -4.13880800 | -1.92643900 |
| H | 1.92618600  | -4.93902400 | -0.07994200 |
| H | 0.23396900  | -3.13549700 | -3.58761200 |
| H | 1.71327500  | -4.83502500 | -2.55028900 |
| H | -2.81848100 | -1.42274100 | -0.66660100 |
| C | -3.84471200 | 4.38379500  | -0.95419200 |
| C | -3.21876500 | 3.47364000  | -0.09680300 |
| C | -1.87498800 | 3.15350300  | -0.25428100 |
| C | -1.17354600 | 3.72822400  | -1.31239600 |
| C | -1.80325000 | 4.61424700  | -2.18688000 |
| C | -3.14207900 | 4.95589900  | -2.00795700 |
| C | -5.26780400 | 4.63499400  | -0.53453300 |
| C | -5.26361100 | 4.13572800  | 0.92595300  |
| C | -4.17404100 | 3.02734100  | 0.98791000  |
| H | -1.39135600 | 2.48864600  | 0.45170100  |
| H | -0.12144400 | 3.49634300  | -1.44647500 |
| H | -1.24054400 | 5.05793100  | -3.00186400 |
| H | -3.62295400 | 5.66857800  | -2.67079600 |
| H | -5.95733600 | 4.06247600  | -1.16532300 |
| H | -4.91707500 | 4.94423500  | 1.57317900  |
| H | -5.56307100 | 5.68410700  | -0.60018400 |
| H | -3.71197900 | 2.91146900  | 1.96792400  |
| N | -4.84234800 | 1.72832000  | 0.68597000  |
| O | -6.50879900 | 3.74038900  | 1.45419600  |
| C | -4.29809100 | 0.50291600  | 0.53358900  |
| C | -6.19525300 | 1.58674200  | 0.51035700  |
| N | -5.32468100 | -0.30824400 | 0.25417400  |

|    |             |             |             |
|----|-------------|-------------|-------------|
| N  | -6.51089700 | 0.35627200  | 0.23124800  |
| C  | -7.14573400 | 2.72648900  | 0.71628500  |
| H  | -7.52839600 | 3.08592900  | -0.24608400 |
| H  | -7.99235300 | 2.37430000  | 1.30760100  |
| C  | -5.33118900 | -1.73307600 | 0.06664700  |
| C  | -5.73852700 | -2.23730900 | -1.16079900 |
| C  | -4.96845400 | -2.56277400 | 1.12147200  |
| C  | -5.77090800 | -3.61504700 | -1.34615800 |
| C  | -4.99487400 | -3.93802200 | 0.93416400  |
| C  | -5.39329300 | -4.44986700 | -0.29898400 |
| H  | -6.08596500 | -4.03805600 | -2.29275500 |
| H  | -4.71650900 | -4.61020800 | 1.73706600  |
| H  | -4.66539500 | -2.13916800 | 2.07288700  |
| H  | -6.03073100 | -1.56246800 | -1.95788800 |
| Cl | -5.42634000 | -6.17083100 | -0.53184300 |
| C  | 4.09713200  | 2.64361900  | -0.63685200 |
| H  | 5.16679000  | 2.77145300  | -0.81378400 |
| H  | 3.55030900  | 2.95259000  | -1.53361700 |
| H  | 3.80514200  | 3.25880300  | 0.21507400  |

Variable frequencies

|           |          |          |
|-----------|----------|----------|
| -351.1889 | 8.3280   | 9.3947   |
| 16.6463   | 21.8603  | 25.1066  |
| 26.2003   | 31.5243  | 34.7293  |
| 39.4108   | 46.7576  | 48.9465  |
| 50.9470   | 56.7355  | 60.0428  |
| 67.3947   | 71.2245  | 75.0195  |
| 82.2366   | 85.6637  | 95.3681  |
| 103.0375  | 126.5432 | 143.3392 |
| 151.7502  | 154.6254 | 157.5151 |
| 164.1253  | 172.6691 | 183.7032 |
| 195.1475  | 209.1202 | 210.9671 |
| 214.3535  | 224.9765 | 230.4703 |
| 242.7313  | 252.4734 | 253.4838 |
| 275.8024  | 280.8527 | 286.6734 |
| 299.3630  | 301.5413 | 314.1050 |
| 330.9692  | 333.1611 | 343.5773 |
| 351.7091  | 354.1054 | 365.8832 |
| 373.1790  | 390.2037 | 408.8237 |
| 411.9726  | 416.9047 | 418.1159 |
| 421.3723  | 435.9366 | 438.9783 |
| 443.1663  | 456.1698 | 463.5810 |
| 467.4410  | 494.3148 | 495.7314 |
| 513.7144  | 518.3993 | 521.6391 |

|           |           |           |
|-----------|-----------|-----------|
| 539.2350  | 549.6837  | 557.3624  |
| 561.6401  | 578.2121  | 585.6017  |
| 592.3739  | 605.3809  | 610.8637  |
| 620.0483  | 623.3472  | 630.3822  |
| 639.5534  | 642.4417  | 643.6680  |
| 648.2966  | 654.7122  | 655.9262  |
| 674.3737  | 693.3317  | 700.5944  |
| 710.7226  | 718.5503  | 719.5701  |
| 721.0340  | 725.6296  | 731.4463  |
| 748.3833  | 756.2770  | 759.2992  |
| 774.8566  | 781.9401  | 787.3342  |
| 789.1381  | 792.2249  | 814.3174  |
| 823.9737  | 824.4928  | 837.9191  |
| 843.1985  | 844.9565  | 846.1872  |
| 847.8193  | 851.6635  | 860.2457  |
| 870.2725  | 877.7079  | 880.5006  |
| 884.7295  | 889.5852  | 899.7534  |
| 920.7724  | 924.3758  | 938.8443  |
| 952.5342  | 960.7639  | 977.5596  |
| 983.5118  | 990.3287  | 990.8247  |
| 996.2107  | 997.6022  | 1005.3168 |
| 1007.1594 | 1012.4297 | 1015.3750 |
| 1017.8338 | 1017.9856 | 1022.1487 |
| 1025.8448 | 1027.0521 | 1030.4359 |
| 1033.4093 | 1034.7465 | 1037.0592 |
| 1054.5843 | 1055.7207 | 1062.6168 |
| 1069.1870 | 1070.6108 | 1075.3354 |
| 1079.7555 | 1095.7142 | 1099.5888 |
| 1112.9972 | 1118.4576 | 1120.9241 |
| 1126.5784 | 1131.0319 | 1133.8929 |
| 1136.0210 | 1144.9351 | 1147.3743 |
| 1157.4746 | 1159.9410 | 1162.2442 |
| 1176.8797 | 1181.2082 | 1183.2761 |
| 1184.3474 | 1187.7586 | 1190.9148 |
| 1198.2778 | 1203.2001 | 1205.3436 |
| 1209.1067 | 1212.5460 | 1213.9216 |
| 1217.7281 | 1227.4005 | 1233.4212 |
| 1235.7389 | 1251.4131 | 1254.9789 |
| 1263.4293 | 1279.4528 | 1288.2807 |
| 1296.1201 | 1297.1582 | 1307.1837 |
| 1319.0150 | 1321.8113 | 1322.5445 |
| 1333.5446 | 1336.8062 | 1337.2250 |
| 1341.9350 | 1351.3724 | 1355.9474 |
| 1359.2332 | 1360.4943 | 1361.3076 |

|           |           |           |
|-----------|-----------|-----------|
| 1363.0292 | 1368.9606 | 1376.5515 |
| 1384.9129 | 1385.2594 | 1423.1823 |
| 1426.9747 | 1427.4533 | 1447.6870 |
| 1457.1520 | 1459.3493 | 1460.0223 |
| 1465.1382 | 1480.1568 | 1491.3523 |
| 1498.2149 | 1500.3591 | 1502.7166 |
| 1504.5303 | 1506.8324 | 1509.1497 |
| 1512.8245 | 1513.4922 | 1520.9065 |
| 1533.0755 | 1542.6427 | 1544.5983 |
| 1550.0133 | 1552.5048 | 1583.5349 |
| 1605.7427 | 1618.6281 | 1668.3712 |
| 1671.5523 | 1671.9334 | 1679.1827 |
| 1680.6735 | 1682.2207 | 1689.7404 |
| 1691.4716 | 1694.8008 | 1700.0403 |
| 1705.3432 | 1734.9279 | 1763.1943 |
| 3042.8230 | 3078.6382 | 3084.0603 |
| 3084.0691 | 3095.9426 | 3143.9782 |
| 3154.6802 | 3154.8982 | 3165.7793 |
| 3171.6078 | 3181.6370 | 3189.7188 |
| 3190.3543 | 3190.4551 | 3193.7026 |
| 3205.5875 | 3208.1033 | 3209.2833 |
| 3209.8295 | 3211.9953 | 3212.6553 |
| 3220.2545 | 3224.4705 | 3226.3116 |
| 3227.5851 | 3227.7284 | 3227.7853 |
| 3230.7990 | 3231.2012 | 3232.6003 |
| 3233.7507 | 3240.1264 | 3244.9283 |
| 3247.2468 | 3250.5035 | 3250.8332 |
| 3251.7232 | 3252.6913 | 3269.6290 |

## **<sup>2</sup>M6R**

Zero-point correction=0.780037

Thermal correction to Energy=0.827865

Thermal correction to Enthalpy=0.828810

Thermal correction to Gibbs Free Energy=0.693388

Sum of electronic and zero-point Energies=-3207.948632

Sum of electronic and thermal Energies=-3207.900803

Sum of electronic and thermal Enthalpies=-3207.899859

Sum of electronic and thermal Free Energies=-3208.035281

Cartesian coordinate

|   |            |             |             |
|---|------------|-------------|-------------|
| N | 2.31381900 | -1.88380900 | -0.42596000 |
| N | 3.66824100 | -2.03227300 | -0.71659900 |
| C | 3.98603400 | -3.17247900 | -1.57560300 |



|   |             |             |             |
|---|-------------|-------------|-------------|
| C | 1.80337700  | -0.57018700 | -0.42756500 |
| C | 0.63436300  | -0.31877300 | 0.22875900  |
| C | -0.07494000 | -1.31071400 | 0.95942200  |
| C | 0.53429600  | -2.58768300 | 1.04051600  |
| C | 1.69391600  | -2.85436000 | 0.38018600  |
| C | -1.25584400 | -0.90297500 | 1.82165800  |
| C | -2.35214500 | -0.22320400 | 1.03888700  |
| C | -2.64377400 | -0.40895400 | -0.25201300 |
| O | -2.08730200 | -1.25430600 | -1.15520900 |
| S | 4.67941300  | -1.88356500 | 0.67507500  |
| O | 4.03253700  | -0.86609600 | 1.48690800  |
| C | 6.14953200  | -1.24250500 | -0.06904300 |
| O | 4.96578000  | -3.20565600 | 1.22141400  |
| C | 7.28851300  | -2.03762000 | -0.12225200 |
| C | 8.43470400  | -1.51710100 | -0.71541000 |
| C | 8.44530700  | -0.22639300 | -1.24972900 |
| C | 7.27738000  | 0.54566700  | -1.18142000 |
| C | 6.12516100  | 0.05092700  | -0.58951800 |
| C | 2.55035200  | 0.48990300  | -1.13015800 |
| C | 2.72331100  | 1.72500000  | -0.49254600 |
| C | 3.41022300  | 2.75774500  | -1.12861700 |
| C | 3.94137200  | 2.56210000  | -2.40171100 |
| C | 3.77912300  | 1.33123000  | -3.03860000 |
| C | 3.09055100  | 0.30158900  | -2.40862400 |
| C | 9.69415900  | 0.34309800  | -1.86774400 |
| H | 3.38215200  | -3.08699200 | -2.47994800 |
| H | 5.04158000  | -3.10492200 | -1.84714200 |
| H | 3.80710300  | -4.13984000 | -1.09415000 |
| H | 0.24548400  | 0.69465300  | 0.18401900  |
| H | 0.09213900  | -3.37542800 | 1.64344800  |
| H | 2.20427800  | -3.80734700 | 0.42761400  |
| H | -1.68161400 | -1.81110800 | 2.27335900  |
| H | 7.26890100  | -3.03778500 | 0.29807600  |
| H | 9.33479400  | -2.12255500 | -0.76182400 |
| H | 7.27350600  | 1.54943800  | -1.59729300 |
| H | 5.22316500  | 0.65326600  | -0.52803900 |
| H | 2.35117100  | 1.85402600  | 0.52060700  |
| H | 3.54588300  | 3.70678400  | -0.61937400 |
| H | 4.48409600  | 3.36211200  | -2.89451000 |
| H | 4.19306500  | 1.17446500  | -4.02931100 |
| H | 2.96714900  | -0.65520500 | -2.90625600 |
| H | 9.45932200  | 0.92734700  | -2.76064500 |
| H | 10.19809900 | 1.01037500  | -1.16131600 |
| H | 10.39724200 | -0.44524300 | -2.14304700 |

|   |             |             |             |
|---|-------------|-------------|-------------|
| C | -0.77689400 | 0.00314500  | 2.95418300  |
| C | -0.32646800 | -0.55669300 | 4.14980000  |
| C | -0.70767100 | 1.38880700  | 2.78745300  |
| C | 0.17806300  | 0.25256900  | 5.16284100  |
| H | -0.36600300 | -1.63462300 | 4.28565000  |
| C | -0.20087900 | 2.20044200  | 3.79865300  |
| H | -1.05222100 | 1.84345100  | 1.85995800  |
| C | 0.24221200  | 1.63363400  | 4.99042200  |
| H | 0.52341900  | -0.19575300 | 6.08872100  |
| H | -0.15361500 | 3.27560200  | 3.65204400  |
| H | 0.63684100  | 2.26365300  | 5.78047400  |
| H | -2.96482700 | 0.49739200  | 1.57386200  |
| C | -6.71601600 | -2.21802600 | -0.06892100 |
| C | -5.38401100 | -2.25296000 | -0.49337800 |
| C | -4.42708000 | -2.99379800 | 0.19365800  |
| C | -4.81761100 | -3.67729500 | 1.34258100  |
| C | -6.14145600 | -3.62649000 | 1.78233700  |
| C | -7.10213100 | -2.90479800 | 1.07599400  |
| C | -7.56716500 | -1.41063100 | -1.01656100 |
| C | -6.69058100 | -1.39072500 | -2.28776100 |
| C | -5.23145700 | -1.45740700 | -1.76679700 |
| H | -3.40507000 | -3.04902200 | -0.16651200 |
| H | -4.09073500 | -4.26603200 | 1.89209800  |
| H | -6.42968600 | -4.17222100 | 2.67471300  |
| H | -8.13582400 | -2.89206800 | 1.40667200  |
| H | -7.73403900 | -0.40298100 | -0.61687900 |
| H | -6.86475400 | -2.30999200 | -2.85117600 |
| H | -8.54748000 | -1.85163500 | -1.20644400 |
| H | -4.52715900 | -1.87150100 | -2.48990200 |
| N | -4.80419000 | -0.04854200 | -1.51455400 |
| O | -6.90761700 | -0.34372800 | -3.20629300 |
| C | -3.71295300 | 0.39015700  | -0.86767000 |
| C | -5.50198000 | 1.06546500  | -1.90451200 |
| N | -3.77829600 | 1.72059200  | -0.89598400 |
| N | -4.89613700 | 2.15833800  | -1.52876600 |
| C | -6.78535100 | 0.95141700  | -2.67108500 |
| H | -7.62936100 | 1.21593200  | -2.02248500 |
| H | -6.76709300 | 1.65043600  | -3.50877700 |
| C | -2.77284400 | 2.63948600  | -0.43842900 |
| C | -3.10678800 | 3.60169700  | 0.50448500  |
| C | -1.48627600 | 2.52375900  | -0.95590000 |
| C | -2.11494300 | 4.46501500  | 0.95965100  |
| C | -0.49653800 | 3.38443100  | -0.49957700 |
| C | -0.82041500 | 4.34160900  | 0.46040900  |

|    |             |             |             |
|----|-------------|-------------|-------------|
| H  | -2.34068500 | 5.22238800  | 1.70116800  |
| H  | 0.51576300  | 3.31207100  | -0.88295300 |
| H  | -1.25764700 | 1.76575500  | -1.69986200 |
| H  | -4.12138000 | 3.67104800  | 0.88101300  |
| Cl | 0.42307200  | 5.40054200  | 1.04712200  |
| H  | -1.29645500 | -1.65467500 | -0.74395500 |

Variable frequencies

|          |          |          |
|----------|----------|----------|
| 9.5872   | 16.9445  | 18.2419  |
| 22.1120  | 24.0525  | 27.0424  |
| 30.3762  | 34.3113  | 39.9438  |
| 50.1839  | 55.1509  | 57.4993  |
| 61.7151  | 65.4855  | 67.4648  |
| 70.0281  | 73.7878  | 85.3296  |
| 96.1552  | 106.1262 | 106.4770 |
| 110.9312 | 135.6824 | 139.9104 |
| 146.2052 | 149.1094 | 161.5006 |
| 177.1426 | 182.6523 | 186.4400 |
| 199.0155 | 205.8365 | 212.2387 |
| 223.8563 | 239.1639 | 252.2332 |
| 256.8259 | 262.1387 | 263.5284 |
| 276.7732 | 282.3066 | 294.9867 |
| 299.5912 | 305.8894 | 315.3966 |
| 328.7232 | 331.8839 | 337.8037 |
| 346.2568 | 360.1425 | 364.5145 |
| 384.6384 | 387.2839 | 402.8446 |
| 416.1429 | 417.8458 | 420.6325 |
| 420.7696 | 426.7992 | 438.8506 |
| 450.0232 | 462.2785 | 464.0210 |
| 471.2104 | 494.2366 | 496.2557 |
| 502.8774 | 516.4065 | 523.7445 |
| 534.8213 | 546.2553 | 549.0212 |
| 560.0223 | 570.5155 | 581.1216 |
| 589.9157 | 594.7322 | 604.0510 |
| 610.2387 | 614.5330 | 628.7504 |
| 630.7281 | 634.5365 | 641.0317 |
| 644.2867 | 650.7784 | 652.6834 |
| 663.6426 | 672.4692 | 677.3512 |
| 706.2165 | 707.3292 | 718.9595 |
| 721.8705 | 723.0792 | 729.0826 |
| 730.1032 | 732.9348 | 738.4285 |
| 761.1262 | 780.2559 | 781.0015 |
| 786.9507 | 789.8800 | 798.4957 |
| 813.2842 | 817.1577 | 834.9762 |

|           |           |           |
|-----------|-----------|-----------|
| 842.2350  | 843.6205  | 851.0295  |
| 858.8813  | 861.8692  | 872.2889  |
| 875.8256  | 877.5387  | 882.5958  |
| 883.1937  | 892.1094  | 902.5642  |
| 906.2027  | 918.3380  | 925.8344  |
| 936.2965  | 952.0209  | 958.3900  |
| 989.3091  | 992.2377  | 992.9885  |
| 1001.0163 | 1004.8259 | 1007.7419 |
| 1009.2534 | 1013.3181 | 1015.2199 |
| 1016.6675 | 1017.1959 | 1018.2657 |
| 1026.3582 | 1029.0507 | 1034.1308 |
| 1034.7743 | 1035.4742 | 1036.4413 |
| 1041.4055 | 1052.4301 | 1066.8604 |
| 1069.5116 | 1072.7494 | 1075.0986 |
| 1086.1782 | 1094.8623 | 1103.2319 |
| 1119.8643 | 1120.9413 | 1124.7286 |
| 1130.8908 | 1132.5009 | 1136.4320 |
| 1139.0957 | 1142.0933 | 1143.6545 |
| 1154.9101 | 1167.1414 | 1179.1590 |
| 1181.4643 | 1182.9020 | 1185.1779 |
| 1185.3689 | 1191.4576 | 1201.6997 |
| 1203.8128 | 1206.3500 | 1208.0811 |
| 1210.4637 | 1212.3778 | 1214.6648 |
| 1218.3052 | 1234.4926 | 1248.8306 |
| 1254.3755 | 1254.6105 | 1267.7267 |
| 1274.8792 | 1278.1879 | 1278.7035 |
| 1286.9717 | 1308.4182 | 1320.2387 |
| 1325.8903 | 1332.0216 | 1333.1633 |
| 1336.3519 | 1343.9327 | 1346.7544 |
| 1351.5887 | 1356.1167 | 1357.4015 |
| 1357.4691 | 1360.3492 | 1362.5525 |
| 1364.2874 | 1368.6300 | 1377.6782 |
| 1378.7352 | 1384.3611 | 1400.8848 |
| 1420.3127 | 1422.9570 | 1427.1407 |
| 1453.5440 | 1454.4471 | 1457.1523 |
| 1463.1441 | 1465.8163 | 1495.8186 |
| 1496.9909 | 1498.0309 | 1503.1626 |
| 1504.2210 | 1506.4223 | 1507.1826 |
| 1513.1235 | 1521.0467 | 1532.5816 |
| 1541.7844 | 1542.4700 | 1548.6176 |
| 1549.4350 | 1551.6123 | 1567.9199 |
| 1622.9895 | 1664.3545 | 1666.4063 |
| 1667.5532 | 1677.9810 | 1679.7057 |
| 1682.4032 | 1683.7852 | 1688.5691 |

|           |           |           |
|-----------|-----------|-----------|
| 1692.2881 | 1698.3278 | 1705.1029 |
| 1711.6761 | 1777.6903 | 3046.1525 |
| 3071.1284 | 3074.1346 | 3077.7736 |
| 3088.0370 | 3147.1413 | 3149.0447 |
| 3155.8402 | 3161.0249 | 3164.8243 |
| 3170.6827 | 3171.9813 | 3185.7240 |
| 3186.1350 | 3195.7685 | 3198.3152 |
| 3202.4864 | 3203.2431 | 3204.7021 |
| 3207.9876 | 3211.0871 | 3213.4620 |
| 3216.3644 | 3216.8288 | 3217.5379 |
| 3218.1178 | 3220.5878 | 3222.9352 |
| 3227.6845 | 3229.7551 | 3230.9123 |
| 3231.1097 | 3234.2862 | 3235.3415 |
| 3235.4045 | 3238.1288 | 3242.9583 |
| 3247.9635 | 3256.3774 | 3621.0763 |

## **<sup>2</sup>M6S**

Zero-point correction=0.779822

Thermal correction to Energy=0.827876

Thermal correction to Enthalpy=0.828820

Thermal correction to Gibbs Free Energy=0.691545

Sum of electronic and zero-point Energies=-3207.947397

Sum of electronic and thermal Energies=-3207.899343

Sum of electronic and thermal Enthalpies=-3207.898399

Sum of electronic and thermal Free Energies=-3208.035674

### Cartesian coordinate

|   |             |             |             |
|---|-------------|-------------|-------------|
| N | -2.46155300 | -1.20565100 | 0.39914500  |
| N | -3.84600400 | -1.39448500 | 0.31790600  |
| C | -2.01201800 | -0.07167000 | 1.10863400  |
| C | -0.74911900 | -0.08921600 | 1.64497400  |
| C | 0.13266700  | -1.18411400 | 1.51339100  |
| C | -0.37341200 | -2.32679800 | 0.83048700  |
| C | -1.63118000 | -2.33691600 | 0.31361800  |
| C | 1.58721300  | -1.08349600 | 1.92009300  |
| C | 2.50143300  | -0.60607800 | 0.81345500  |
| C | 2.21663400  | -0.28919100 | -0.45624500 |
| O | 1.05867900  | -0.32079300 | -1.16055500 |
| S | -4.32427800 | -1.79793000 | -1.27913400 |
| O | -4.14664100 | -3.22978700 | -1.50587100 |
| C | -6.05579500 | -1.45691100 | -1.19304700 |
| O | -3.63751700 | -0.84578100 | -2.13906700 |
| C | -6.48650700 | -0.17249900 | -0.86233200 |

|   |              |             |             |
|---|--------------|-------------|-------------|
| C | -7.84956900  | 0.07938800  | -0.83106000 |
| C | -8.77887200  | -0.92506100 | -1.13501700 |
| C | -8.31205400  | -2.19989000 | -1.46283100 |
| C | -6.94920300  | -2.47872500 | -1.49341600 |
| C | -2.85139100  | 1.13872200  | 1.15623700  |
| C | -3.43554200  | 1.65451400  | -0.00920300 |
| C | -4.13147600  | 2.85742400  | 0.03454200  |
| C | -4.25882400  | 3.55707800  | 1.23475700  |
| C | -3.68456600  | 3.04650100  | 2.39567900  |
| C | -2.98610300  | 1.84235500  | 2.35913000  |
| C | -10.25252900 | -0.62041000 | -1.12122000 |
| H | -0.40967500  | 0.81417100  | 2.14224000  |
| H | 0.24717800   | -3.20785400 | 0.69338100  |
| H | -2.05920200  | -3.17914300 | -0.21654500 |
| H | 1.93510100   | -2.09469000 | 2.18093000  |
| H | -5.76631200  | 0.60256300  | -0.61782100 |
| H | -8.20446100  | 1.07103600  | -0.56571900 |
| H | -9.02330400  | -2.98683100 | -1.69441000 |
| H | -6.57607200  | -3.46684400 | -1.74045600 |
| H | -3.32432200  | 1.11430300  | -0.94586900 |
| H | -4.56943700  | 3.25539100  | -0.87578900 |
| H | -4.80439600  | 4.49443700  | 1.26347100  |
| H | -3.78749300  | 3.57932300  | 3.33542500  |
| H | -2.54978300  | 1.43459300  | 3.26669400  |
| H | -10.53004200 | -0.04280900 | -2.00844100 |
| H | -10.52165900 | -0.02524100 | -0.24523700 |
| H | -10.84783200 | -1.53493100 | -1.11577400 |
| C | 1.77505100   | -0.21081000 | 3.15627200  |
| C | 1.59302100   | -0.76427900 | 4.42524900  |
| C | 2.06283500   | 1.15080900  | 3.04492400  |
| C | 1.70434600   | 0.02736300  | 5.56339000  |
| H | 1.35977400   | -1.82198500 | 4.51830300  |
| C | 2.16525300   | 1.94721600  | 4.18374600  |
| H | 2.19508100   | 1.59711400  | 2.06178700  |
| C | 1.98998400   | 1.38686500  | 5.44533500  |
| H | 1.56843400   | -0.41675600 | 6.54415800  |
| H | 2.38234000   | 3.00582300  | 4.07917200  |
| H | 2.07432200   | 2.00390200  | 6.33387100  |
| H | 3.54369400   | -0.48531900 | 1.10242400  |
| H | 0.34085200   | -0.65466300 | -0.59808300 |
| C | 2.40967300   | 4.06956300  | -0.58263900 |
| C | 1.66745400   | 2.92772700  | -0.91036700 |
| C | 0.54866400   | 2.56208200  | -0.16789800 |
| C | 0.21203900   | 3.32728500  | 0.94845800  |

|    |             |             |             |
|----|-------------|-------------|-------------|
| C  | 0.98828700  | 4.42827200  | 1.31323000  |
| C  | 2.08632900  | 4.81463700  | 0.54464800  |
| C  | 3.43757900  | 4.36523300  | -1.64635300 |
| C  | 2.83838100  | 3.60276800  | -2.84985500 |
| C  | 2.17367300  | 2.35551300  | -2.21445700 |
| H  | -0.06731700 | 1.71872900  | -0.46167200 |
| H  | -0.67511300 | 3.07561600  | 1.52299700  |
| H  | 0.71181900  | 5.01254600  | 2.18496900  |
| H  | 2.65474700  | 5.70269500  | 0.80234600  |
| H  | 4.42265500  | 3.97358500  | -1.36309000 |
| H  | 2.03211800  | 4.20071400  | -3.27999500 |
| H  | 3.55484900  | 5.43051400  | -1.85346900 |
| H  | 1.41076200  | 1.89225300  | -2.84118800 |
| N  | 3.26977600  | 1.34797500  | -2.04978400 |
| O  | 3.69647500  | 3.30078400  | -3.92350500 |
| C  | 3.29635100  | 0.21875700  | -1.31710000 |
| C  | 4.49239200  | 1.43841600  | -2.66671000 |
| N  | 4.49578400  | -0.32504800 | -1.52188200 |
| N  | 5.25823900  | 0.43375000  | -2.34960800 |
| C  | 4.85026200  | 2.58156800  | -3.56754800 |
| H  | 5.59643700  | 3.21510500  | -3.07171200 |
| H  | 5.29060900  | 2.19077300  | -4.48639100 |
| C  | 5.00318600  | -1.57951100 | -1.04172500 |
| C  | 6.27043900  | -1.60681800 | -0.47478100 |
| C  | 4.23189400  | -2.72768800 | -1.18777200 |
| C  | 6.77821100  | -2.82019600 | -0.02594900 |
| C  | 4.73841200  | -3.93676900 | -0.73121300 |
| C  | 6.00573200  | -3.97110900 | -0.15293900 |
| H  | 7.76406300  | -2.87493900 | 0.42024800  |
| H  | 4.16440700  | -4.85008400 | -0.83444800 |
| H  | 3.25567300  | -2.67940700 | -1.65956000 |
| H  | 6.85146500  | -0.69494800 | -0.39403800 |
| Cl | 6.63828800  | -5.48452600 | 0.41069500  |
| C  | -4.37986500 | -2.28101600 | 1.36335400  |
| H  | -5.46513700 | -2.32261500 | 1.26276700  |
| H  | -3.96351500 | -3.29190700 | 1.30435000  |
| H  | -4.13161800 | -1.82685700 | 2.32448000  |

#### Variable frequencies

|         |         |         |
|---------|---------|---------|
| 5.4534  | 8.6205  | 14.4847 |
| 22.2845 | 25.7001 | 26.8326 |
| 31.0100 | 33.5154 | 37.1360 |
| 48.2500 | 53.4315 | 58.2180 |
| 62.7351 | 65.8434 | 73.6699 |

|           |           |           |
|-----------|-----------|-----------|
| 74.1384   | 81.0315   | 87.0594   |
| 91.6461   | 94.2651   | 99.3901   |
| 108.0540  | 127.9568  | 132.1585  |
| 140.1559  | 151.8648  | 168.6103  |
| 173.7416  | 185.4410  | 189.7853  |
| 206.3023  | 212.2001  | 215.9695  |
| 224.8995  | 232.0470  | 246.5522  |
| 251.2094  | 256.0465  | 264.2736  |
| 273.6383  | 276.3331  | 290.5734  |
| 297.3529  | 301.7768  | 317.7006  |
| 321.1071  | 331.3086  | 338.3747  |
| 345.0501  | 363.3498  | 367.6490  |
| 384.9350  | 392.8090  | 398.6393  |
| 399.3072  | 412.1112  | 420.1513  |
| 421.0134  | 423.4950  | 425.0472  |
| 437.5714  | 443.4080  | 462.4684  |
| 465.4821  | 467.8960  | 495.7152  |
| 500.0566  | 512.6989  | 518.8964  |
| 526.4042  | 542.5588  | 544.2516  |
| 548.8879  | 556.6705  | 571.4283  |
| 580.1249  | 591.0211  | 599.8528  |
| 607.8252  | 612.3379  | 629.4625  |
| 630.6494  | 636.3026  | 639.5864  |
| 643.5848  | 652.2252  | 655.3786  |
| 663.8754  | 672.3021  | 684.9175  |
| 704.5748  | 707.5482  | 719.0352  |
| 723.3010  | 724.4581  | 727.0771  |
| 728.3916  | 730.8541  | 761.4518  |
| 774.6375  | 777.9493  | 788.1259  |
| 791.3702  | 797.7306  | 805.2303  |
| 813.8365  | 823.0003  | 834.8244  |
| 837.0071  | 841.1486  | 848.4123  |
| 856.7310  | 861.2086  | 864.6010  |
| 866.0423  | 883.0723  | 888.5157  |
| 890.8168  | 897.6546  | 905.4722  |
| 912.0578  | 920.0037  | 929.0079  |
| 954.0761  | 958.0869  | 964.7348  |
| 982.5298  | 985.2359  | 991.0883  |
| 995.0754  | 998.8387  | 1002.1796 |
| 1007.6864 | 1012.7143 | 1013.3255 |
| 1014.4287 | 1017.4745 | 1019.0242 |
| 1029.9124 | 1031.7479 | 1032.8363 |
| 1035.0278 | 1037.5879 | 1039.5523 |
| 1044.6704 | 1054.0354 | 1067.2700 |



|           |           |           |
|-----------|-----------|-----------|
| 1071.1010 | 1072.2286 | 1073.6600 |
| 1074.5063 | 1081.9007 | 1100.1751 |
| 1121.0575 | 1121.6876 | 1122.7848 |
| 1129.3192 | 1131.9991 | 1134.8129 |
| 1137.7481 | 1139.6305 | 1145.9260 |
| 1154.0825 | 1160.1864 | 1174.3373 |
| 1179.9567 | 1181.6822 | 1183.2697 |
| 1191.3548 | 1192.2891 | 1201.3527 |
| 1204.0399 | 1207.4512 | 1208.3775 |
| 1211.4100 | 1213.1984 | 1214.4965 |
| 1217.4167 | 1238.2105 | 1245.1855 |
| 1246.7565 | 1255.1697 | 1259.6221 |
| 1266.4136 | 1277.5641 | 1280.0456 |
| 1289.0441 | 1300.5310 | 1302.6628 |
| 1323.0413 | 1327.8185 | 1331.3963 |
| 1335.1913 | 1337.6633 | 1342.5521 |
| 1353.8594 | 1355.3342 | 1357.2640 |
| 1360.7774 | 1364.0170 | 1364.4402 |
| 1366.9150 | 1367.1398 | 1372.2647 |
| 1376.5183 | 1384.5309 | 1396.4039 |
| 1421.2440 | 1425.9694 | 1428.1533 |
| 1451.7755 | 1454.6545 | 1456.1259 |
| 1462.7168 | 1469.1566 | 1493.6881 |
| 1494.1684 | 1499.0436 | 1501.2454 |
| 1504.9689 | 1505.2452 | 1506.0751 |
| 1506.2616 | 1522.6661 | 1527.9998 |
| 1539.5970 | 1540.4545 | 1551.4508 |
| 1552.1240 | 1553.4853 | 1563.8636 |
| 1622.1069 | 1665.3699 | 1666.4998 |
| 1670.0243 | 1678.8258 | 1679.3874 |
| 1685.8761 | 1688.8836 | 1692.3438 |
| 1692.7952 | 1698.9176 | 1701.9731 |
| 1702.6580 | 1775.7583 | 3032.8829 |
| 3069.6592 | 3074.6111 | 3082.8629 |
| 3087.2195 | 3149.5354 | 3154.0960 |
| 3159.5650 | 3164.4377 | 3169.8509 |
| 3172.0960 | 3177.7385 | 3182.8684 |
| 3190.6611 | 3194.4568 | 3201.5517 |
| 3202.0386 | 3202.1362 | 3203.7902 |
| 3205.2517 | 3210.0459 | 3212.8172 |
| 3214.1616 | 3219.0494 | 3220.0137 |
| 3220.9381 | 3222.3276 | 3222.6282 |
| 3224.3147 | 3229.1700 | 3230.2909 |
| 3235.0916 | 3236.0684 | 3239.0062 |

|           |           |           |
|-----------|-----------|-----------|
| 3240.6110 | 3244.6760 | 3249.2333 |
| 3250.0108 | 3255.4928 | 3762.0094 |

## **<sup>2</sup>TS7R**

Zero-point correction=0.777918

Thermal correction to Energy=0.825963

Thermal correction to Enthalpy=0.826908

Thermal correction to Gibbs Free Energy=0.690477

Sum of electronic and zero-point Energies=-3207.925346

Sum of electronic and thermal Energies=-3207.877300

Sum of electronic and thermal Enthalpies=-3207.876356

Sum of electronic and thermal Free Energies=-3208.012787

### Cartesian coordinate

|   |             |             |             |
|---|-------------|-------------|-------------|
| N | 2.59840700  | 1.15692700  | -0.32358500 |
| N | 4.31333200  | 0.93891800  | -0.61794300 |
| C | 4.79924900  | 2.18478300  | -1.19755900 |
| C | 2.21068700  | 0.37722300  | 0.73697000  |
| C | 1.09169000  | -0.44044600 | 0.64501400  |
| C | 0.35033100  | -0.50924300 | -0.53115400 |
| C | 0.75769100  | 0.29760700  | -1.60423900 |
| C | 1.85698000  | 1.11019500  | -1.47134300 |
| C | -0.94090800 | -1.30750600 | -0.65137200 |
| C | -2.06523500 | -0.34413600 | -0.37589800 |
| C | -3.02568600 | -0.00422000 | -1.23626400 |
| O | -3.24850300 | -0.45941600 | -2.50026700 |
| S | 4.51643300  | -0.40500400 | -1.61418700 |
| O | 3.69224200  | -1.45976200 | -1.03457700 |
| C | 6.22774800  | -0.76042800 | -1.32629400 |
| O | 4.34726700  | -0.05701400 | -3.02655600 |
| C | 7.14470500  | -0.58794100 | -2.35507500 |
| C | 8.48734800  | -0.86180900 | -2.10538700 |
| C | 8.90998400  | -1.29715300 | -0.84836600 |
| C | 7.95845900  | -1.45506900 | 0.16995300  |
| C | 6.61721300  | -1.18927800 | -0.05687700 |
| C | 3.02888000  | 0.45161600  | 1.96083800  |
| C | 3.19707800  | -0.68104100 | 2.76402300  |
| C | 3.96121900  | -0.61145000 | 3.92494900  |
| C | 4.56630500  | 0.58759400  | 4.29234500  |
| C | 4.41194500  | 1.71693100  | 3.48927000  |
| C | 3.65362200  | 1.64908500  | 2.32755300  |
| C | 10.35958000 | -1.60245000 | -0.57910200 |
| H | 4.55777700  | 2.98703900  | -0.49889500 |

|   |             |             |             |
|---|-------------|-------------|-------------|
| H | 5.88823700  | 2.12445800  | -1.29760800 |
| H | 4.37556300  | 2.40325500  | -2.18504000 |
| H | 0.79535000  | -1.01384700 | 1.51746800  |
| H | 0.20494900  | 0.30373800  | -2.54007500 |
| H | 2.20671400  | 1.73912800  | -2.28389500 |
| H | -0.99705700 | -1.64806200 | -1.69392500 |
| H | 6.80264200  | -0.25193900 | -3.32824800 |
| H | 9.21668500  | -0.73548200 | -2.89984700 |
| H | 8.28117700  | -1.79001300 | 1.15165600  |
| H | 5.87655600  | -1.30211200 | 0.72936500  |
| H | 2.75753200  | -1.62607200 | 2.45860600  |
| H | 4.09298000  | -1.49829800 | 4.53637600  |
| H | 5.16268700  | 0.64061400  | 5.19733400  |
| H | 4.88534700  | 2.65205500  | 3.77061800  |
| H | 3.52536500  | 2.52451000  | 1.69813000  |
| H | 10.71567000 | -1.05897700 | 0.30042600  |
| H | 10.49851900 | -2.66969600 | -0.38199300 |
| H | 10.98765700 | -1.33021800 | -1.42910900 |
| C | -1.03311000 | -2.55037800 | 0.22138200  |
| C | -0.70526200 | -3.79196500 | -0.32726100 |
| C | -1.45009100 | -2.48993300 | 1.55364500  |
| C | -0.79420400 | -4.95212900 | 0.43753800  |
| H | -0.36991600 | -3.85046300 | -1.35953200 |
| C | -1.53673300 | -3.64858400 | 2.32124400  |
| H | -1.72036600 | -1.53898400 | 2.00353600  |
| C | -1.21237500 | -4.88281800 | 1.76469300  |
| H | -0.53482900 | -5.90882000 | -0.00385600 |
| H | -1.86347000 | -3.58538600 | 3.35410300  |
| H | -1.28122600 | -5.78608900 | 2.36177400  |
| H | -2.06638800 | 0.15224200  | 0.59047000  |
| C | -6.62813400 | -1.77089300 | 0.54958600  |
| C | -5.72538400 | -1.66449100 | -0.51298600 |
| C | -4.68231100 | -2.57477400 | -0.65807500 |
| C | -4.51560500 | -3.56411100 | 0.30773800  |
| C | -5.39859800 | -3.65203600 | 1.38495900  |
| C | -6.46964200 | -2.76818300 | 1.50506100  |
| C | -7.70871900 | -0.72405700 | 0.45522600  |
| C | -7.59896100 | -0.28107000 | -1.02023300 |
| C | -6.10966800 | -0.49730700 | -1.39442500 |
| H | -4.01891600 | -2.52792700 | -1.51401500 |
| H | -3.69373200 | -4.26864200 | 0.21970700  |
| H | -5.25758200 | -4.42959100 | 2.12869800  |
| H | -7.17308300 | -2.86161300 | 2.32648700  |
| H | -7.50435700 | 0.10216700  | 1.14684700  |

|    |             |             |             |
|----|-------------|-------------|-------------|
| H  | -8.18281300 | -0.96283300 | -1.64180100 |
| H  | -8.70497600 | -1.10378900 | 0.69004600  |
| H  | -5.93749000 | -0.63643000 | -2.46222700 |
| N  | -5.39417000 | 0.75564500  | -0.99592700 |
| O  | -8.06713500 | 1.01004700  | -1.33913100 |
| C  | -4.07132500 | 0.95273400  | -0.86287300 |
| C  | -6.00505600 | 1.89725600  | -0.54910700 |
| N  | -3.92731100 | 2.17325400  | -0.34625000 |
| N  | -5.12822100 | 2.77053200  | -0.13666000 |
| C  | -7.49664800 | 2.05030200  | -0.58371800 |
| H  | -7.88934900 | 2.08957800  | 0.43957800  |
| H  | -7.74896700 | 2.98873600  | -1.08128600 |
| C  | -2.71045200 | 2.85198600  | 0.00402300  |
| C  | -2.62899100 | 3.44238400  | 1.25958500  |
| C  | -1.65404100 | 2.88853200  | -0.89930000 |
| C  | -1.44749100 | 4.07303000  | 1.62991200  |
| C  | -0.47173300 | 3.51085100  | -0.52247500 |
| C  | -0.37688500 | 4.09026500  | 0.74011300  |
| H  | -1.35264600 | 4.53899600  | 2.60356700  |
| H  | 0.37027000  | 3.54937800  | -1.20283700 |
| H  | -1.74785100 | 2.43854800  | -1.88201500 |
| H  | -3.47689100 | 3.40707100  | 1.93432900  |
| Cl | 1.10932100  | 4.85345900  | 1.21065700  |
| H  | -2.59118000 | -1.12757900 | -2.73769200 |

Variable frequencies

|           |          |          |
|-----------|----------|----------|
| -649.1236 | 11.4171  | 14.9336  |
| 19.5370   | 21.1232  | 29.3569  |
| 31.7676   | 32.2041  | 37.3065  |
| 38.6138   | 39.8999  | 41.5858  |
| 49.3332   | 53.8011  | 58.8331  |
| 63.8904   | 65.9278  | 67.9284  |
| 76.1780   | 85.5967  | 94.3774  |
| 103.5411  | 114.2672 | 128.9059 |
| 142.4402  | 147.0230 | 155.6125 |
| 164.9937  | 178.3686 | 183.2569 |
| 185.3694  | 194.7384 | 208.0876 |
| 216.8003  | 229.6825 | 230.2443 |
| 241.8608  | 252.9270 | 262.5582 |
| 266.1553  | 271.6017 | 279.0969 |
| 289.8386  | 304.0761 | 305.0071 |
| 315.2417  | 323.8485 | 332.6189 |
| 345.4976  | 351.3592 | 359.8191 |
| 370.3840  | 380.4470 | 381.9501 |

|           |           |           |
|-----------|-----------|-----------|
| 391.4261  | 408.1224  | 412.0098  |
| 416.6480  | 418.3170  | 423.2665  |
| 430.9992  | 443.5496  | 453.4681  |
| 461.5051  | 465.0639  | 475.3207  |
| 488.6231  | 495.2896  | 496.7551  |
| 514.9991  | 519.7960  | 536.8191  |
| 541.7756  | 549.0253  | 554.0426  |
| 569.6649  | 582.4046  | 594.5656  |
| 606.7190  | 611.2748  | 626.0188  |
| 628.0736  | 631.9826  | 637.1244  |
| 642.9193  | 648.5166  | 648.9032  |
| 655.7863  | 665.4678  | 670.5149  |
| 697.1265  | 707.4864  | 716.5532  |
| 717.3499  | 720.9189  | 723.1490  |
| 730.4105  | 736.3313  | 743.7288  |
| 760.3693  | 774.4032  | 776.1227  |
| 791.0092  | 794.0076  | 794.8199  |
| 809.2524  | 824.0170  | 833.2419  |
| 841.4495  | 846.4116  | 853.1858  |
| 856.1279  | 861.5167  | 869.8987  |
| 871.7658  | 872.7354  | 876.2898  |
| 887.2618  | 894.4734  | 901.6436  |
| 920.2202  | 926.8275  | 932.3741  |
| 946.4289  | 953.7970  | 957.2603  |
| 960.6067  | 986.1677  | 986.9905  |
| 992.7013  | 997.7557  | 999.6603  |
| 1006.1529 | 1007.9902 | 1008.2007 |
| 1015.9763 | 1016.5434 | 1017.7255 |
| 1021.4197 | 1023.4704 | 1025.0604 |
| 1035.4278 | 1037.1957 | 1038.4188 |
| 1043.2969 | 1055.6673 | 1064.1022 |
| 1066.2535 | 1071.4313 | 1073.1708 |
| 1077.1040 | 1091.5638 | 1100.5572 |
| 1105.8856 | 1119.0352 | 1119.5269 |
| 1120.5164 | 1133.5002 | 1136.5055 |
| 1143.8289 | 1146.1367 | 1149.8105 |
| 1155.2555 | 1161.4707 | 1163.1335 |
| 1174.2892 | 1177.9798 | 1180.6046 |
| 1181.8965 | 1185.2163 | 1191.3054 |
| 1197.9289 | 1204.1777 | 1204.3061 |
| 1205.9273 | 1206.7583 | 1214.3903 |
| 1216.7799 | 1233.2194 | 1238.6515 |
| 1243.3145 | 1254.0079 | 1261.6287 |
| 1266.2769 | 1277.5428 | 1282.3992 |

|           |           |           |
|-----------|-----------|-----------|
| 1295.7514 | 1299.4035 | 1313.7213 |
| 1317.5274 | 1323.9007 | 1327.8104 |
| 1335.8422 | 1339.7184 | 1341.5026 |
| 1347.5532 | 1349.3551 | 1351.6131 |
| 1352.9590 | 1360.4549 | 1362.7376 |
| 1364.3565 | 1366.5882 | 1373.8357 |
| 1380.1494 | 1386.3293 | 1418.7728 |
| 1422.9969 | 1426.4983 | 1441.2692 |
| 1456.0182 | 1457.1717 | 1458.7277 |
| 1471.6196 | 1484.3635 | 1496.8931 |
| 1497.4649 | 1500.3182 | 1504.6036 |
| 1505.9779 | 1506.7417 | 1507.9120 |
| 1511.5158 | 1525.1632 | 1529.6037 |
| 1540.9758 | 1552.0827 | 1554.1913 |
| 1554.2839 | 1555.2842 | 1572.7453 |
| 1624.4774 | 1659.7088 | 1664.3639 |
| 1672.1488 | 1675.9297 | 1680.1177 |
| 1683.8044 | 1686.7402 | 1689.9943 |
| 1692.1860 | 1694.6803 | 1697.5021 |
| 1704.6209 | 1781.8071 | 3056.2261 |
| 3057.1010 | 3074.1430 | 3078.0452 |
| 3088.5265 | 3132.2958 | 3143.0674 |
| 3147.5352 | 3158.7525 | 3163.3184 |
| 3167.8828 | 3170.2606 | 3174.0006 |
| 3195.2736 | 3198.0456 | 3198.7286 |
| 3201.9960 | 3202.2045 | 3205.9328 |
| 3206.8921 | 3210.0468 | 3213.4852 |
| 3213.7377 | 3214.2186 | 3215.7254 |
| 3218.8455 | 3219.8784 | 3221.8055 |
| 3231.4405 | 3232.9046 | 3233.5097 |
| 3237.0890 | 3238.9218 | 3239.0689 |
| 3240.7547 | 3240.8175 | 3242.3769 |
| 3251.9730 | 3256.8165 | 3858.7314 |

## M7R

Zero-point correction=0.604896

Thermal correction to Energy=0.640172

Thermal correction to Enthalpy=0.641116

Thermal correction to Gibbs Free Energy=0.535133

Sum of electronic and zero-point Energies=-2294.228443

Sum of electronic and thermal Energies=-2294.193167

Sum of electronic and thermal Enthalpies=-2294.192223

Sum of electronic and thermal Free Energies=-2294.298207

Cartesian coordinate

|   |             |             |             |
|---|-------------|-------------|-------------|
| N | -4.32846000 | 0.90875700  | 0.73241300  |
| C | -3.92216500 | 0.76180100  | -0.53549000 |
| C | -2.63691400 | 1.13848900  | -0.94670900 |
| C | -1.76259200 | 1.70830100  | -0.02858400 |
| C | -2.19652000 | 1.86993000  | 1.28641100  |
| C | -3.48213600 | 1.44757300  | 1.60906300  |
| C | -0.32215700 | 2.01579800  | -0.42631500 |
| C | 0.45609000  | 0.79935200  | -0.00768400 |
| C | 1.00830600  | -0.10556000 | -0.81775700 |
| O | 1.11517800  | -0.10144200 | -2.17450700 |
| C | -4.87935900 | 0.11794300  | -1.47247800 |
| C | -4.80261000 | 0.32122600  | -2.85445700 |
| C | -5.69798400 | -0.31086400 | -3.71042900 |
| C | -6.67901700 | -1.15581300 | -3.19660800 |
| C | -6.76766900 | -1.35678500 | -1.82081800 |
| C | -5.87848000 | -0.71980400 | -0.96264500 |
| H | -2.31217000 | 0.95651400  | -1.96727800 |
| H | -1.55371900 | 2.31571800  | 2.03900900  |
| H | -3.85037800 | 1.54437600  | 2.62789600  |
| H | -0.30514800 | 2.11816100  | -1.52037700 |
| H | -4.06461400 | 1.00352800  | -3.26558800 |
| H | -5.63686600 | -0.13501200 | -4.77940400 |
| H | -7.37695400 | -1.64832500 | -3.86570900 |
| H | -7.53376000 | -2.00920400 | -1.41484500 |
| H | -5.94771200 | -0.85394600 | 0.11256700  |
| C | 0.22474500  | 3.30729900  | 0.16721100  |
| C | -0.55468000 | 4.46751000  | 0.12277100  |
| C | 1.50754300  | 3.37135200  | 0.70882000  |
| C | -0.05611100 | 5.66903300  | 0.61220500  |
| H | -1.55813400 | 4.42573300  | -0.29259000 |
| C | 2.00834600  | 4.57698400  | 1.19909000  |
| H | 2.13040600  | 2.48160400  | 0.73938900  |
| C | 1.22796700  | 5.72704200  | 1.15292300  |
| H | -0.67098000 | 6.56208600  | 0.57419300  |
| H | 3.00975700  | 4.61120900  | 1.61726700  |
| H | 1.61488500  | 6.66519900  | 1.53649200  |
| H | 0.48740900  | 0.59725900  | 1.06030200  |
| C | 5.50294800  | -0.15697100 | -0.19916900 |
| C | 4.35776500  | 0.01045300  | -0.98506800 |
| C | 3.87262700  | 1.28130500  | -1.27924600 |
| C | 4.53168900  | 2.38830400  | -0.74750700 |
| C | 5.66006900  | 2.22112400  | 0.05588800  |

|    |             |             |             |
|----|-------------|-------------|-------------|
| C  | 6.15912500  | 0.94861800  | 0.32819800  |
| C  | 5.87210400  | -1.61218400 | -0.07523500 |
| C  | 5.09986000  | -2.24130700 | -1.25405000 |
| C  | 3.85484900  | -1.33536300 | -1.45647000 |
| H  | 3.01098400  | 1.41419400  | -1.92431200 |
| H  | 4.16484300  | 3.38633300  | -0.96432800 |
| H  | 6.16587900  | 3.09324300  | 0.45721200  |
| H  | 7.05383400  | 0.82460900  | 0.93034700  |
| H  | 5.54036100  | -2.01066300 | 0.89070900  |
| H  | 5.70111500  | -2.15257700 | -2.16117700 |
| H  | 6.94517600  | -1.79800600 | -0.15095900 |
| H  | 3.46464600  | -1.35155400 | -2.47495200 |
| N  | 2.77714000  | -1.88221700 | -0.57718300 |
| O  | 4.78155700  | -3.61009100 | -1.14962100 |
| C  | 1.58708300  | -1.33794100 | -0.27031600 |
| C  | 2.86817900  | -3.04703900 | 0.13897200  |
| N  | 1.01454600  | -2.16623400 | 0.60343400  |
| N  | 1.80831600  | -3.23160000 | 0.87653800  |
| C  | 4.05002900  | -3.95902400 | -0.00025500 |
| H  | 4.65813500  | -3.92803600 | 0.91150700  |
| H  | 3.69485000  | -4.98179500 | -0.13744300 |
| C  | -0.29206000 | -2.06607800 | 1.19712000  |
| C  | -0.38834200 | -2.05318100 | 2.58237600  |
| C  | -1.41114500 | -1.99388000 | 0.37467700  |
| C  | -1.64643100 | -1.95209600 | 3.16440900  |
| C  | -2.66719900 | -1.89553000 | 0.95874400  |
| C  | -2.77178000 | -1.86919100 | 2.34784200  |
| H  | -1.75571500 | -1.93702200 | 4.24221700  |
| H  | -3.55922200 | -1.84668100 | 0.34357900  |
| H  | -1.30662100 | -2.01922700 | -0.70540700 |
| H  | 0.50548300  | -2.12094200 | 3.19298000  |
| Cl | -4.33961800 | -1.73691300 | 3.07537500  |
| H  | 0.77921600  | 0.72712300  | -2.54265800 |

#### Variable frequencies

|          |          |          |
|----------|----------|----------|
| 14.3655  | 18.4841  | 25.3118  |
| 26.6718  | 38.4546  | 39.9711  |
| 48.9153  | 52.3724  | 57.6608  |
| 65.6971  | 76.0722  | 79.5374  |
| 90.3813  | 101.6311 | 105.0875 |
| 120.9842 | 140.1425 | 144.4695 |
| 166.9915 | 174.6951 | 205.8099 |
| 212.3282 | 214.5816 | 225.2561 |
| 239.8460 | 249.1004 | 255.1595 |



|           |           |           |
|-----------|-----------|-----------|
| 266.6614  | 271.8289  | 286.4558  |
| 306.7914  | 340.0518  | 342.7595  |
| 351.5913  | 358.1324  | 371.4193  |
| 380.6261  | 404.7661  | 412.1168  |
| 417.8338  | 419.2546  | 425.1774  |
| 443.8365  | 452.8310  | 460.9703  |
| 467.5492  | 472.0730  | 492.6156  |
| 496.8186  | 519.1009  | 532.5300  |
| 540.0004  | 556.0739  | 586.0527  |
| 598.4160  | 605.3820  | 614.7346  |
| 628.5013  | 631.0376  | 637.9148  |
| 647.9051  | 652.2155  | 658.8732  |
| 668.7724  | 675.9503  | 707.7977  |
| 717.8423  | 721.3939  | 723.3663  |
| 726.2772  | 750.5599  | 758.9213  |
| 766.0319  | 773.0642  | 778.5697  |
| 781.9753  | 784.1872  | 803.7235  |
| 813.3154  | 844.5892  | 847.1573  |
| 851.1041  | 861.5452  | 874.7285  |
| 878.8105  | 881.1025  | 882.8723  |
| 888.2634  | 893.6313  | 900.5260  |
| 912.6847  | 921.2414  | 942.5234  |
| 961.2313  | 962.8868  | 974.3558  |
| 978.9286  | 997.0398  | 1002.0427 |
| 1004.7098 | 1006.8621 | 1007.1452 |
| 1016.2938 | 1019.3225 | 1020.5433 |
| 1022.3227 | 1023.9532 | 1028.7436 |
| 1033.9167 | 1035.9910 | 1042.3722 |
| 1052.4247 | 1065.9823 | 1070.6092 |
| 1072.5172 | 1091.7871 | 1098.3809 |
| 1107.4246 | 1121.7458 | 1125.7060 |
| 1132.1566 | 1134.3127 | 1138.8200 |
| 1147.7756 | 1154.1675 | 1163.6424 |
| 1176.5986 | 1182.9551 | 1183.4039 |
| 1185.7134 | 1196.8466 | 1202.3561 |
| 1203.1901 | 1207.0698 | 1215.3513 |
| 1220.2930 | 1225.3781 | 1234.3600 |
| 1244.1276 | 1260.5031 | 1263.0303 |
| 1274.3359 | 1284.9897 | 1298.4361 |
| 1312.5320 | 1313.7162 | 1320.1359 |
| 1323.3729 | 1325.6757 | 1335.0696 |
| 1340.4212 | 1345.3993 | 1350.1266 |
| 1352.3262 | 1356.4042 | 1365.4502 |
| 1367.8452 | 1370.0642 | 1373.2920 |

|           |           |           |
|-----------|-----------|-----------|
| 1382.2303 | 1417.3032 | 1423.6355 |
| 1455.6008 | 1457.1099 | 1466.0850 |
| 1494.3087 | 1502.0367 | 1504.7050 |
| 1505.7448 | 1522.2327 | 1529.4002 |
| 1535.5908 | 1536.1977 | 1550.5134 |
| 1553.4552 | 1563.5191 | 1624.0786 |
| 1655.2114 | 1664.1103 | 1676.6631 |
| 1679.9257 | 1680.9687 | 1682.7579 |
| 1686.1469 | 1686.6615 | 1697.9226 |
| 1701.0397 | 1704.1912 | 1788.6992 |
| 3047.0693 | 3082.0235 | 3093.1681 |
| 3148.8142 | 3157.7417 | 3164.5028 |
| 3165.5441 | 3193.9466 | 3199.8665 |
| 3200.2660 | 3202.4228 | 3204.3994 |
| 3204.6280 | 3206.3412 | 3213.3252 |
| 3213.9885 | 3219.6380 | 3221.1737 |
| 3222.8480 | 3224.2362 | 3225.3287 |
| 3226.6250 | 3231.7720 | 3232.1781 |
| 3234.8810 | 3236.5358 | 3247.6259 |
| 3247.7636 | 3250.0548 | 3871.8080 |

## TS8R

Zero-point correction=0.600346

Thermal correction to Energy=0.634819

Thermal correction to Enthalpy=0.635763

Thermal correction to Gibbs Free Energy=0.532719

Sum of electronic and zero-point Energies=-2294.124813

Sum of electronic and thermal Energies=-2294.090340

Sum of electronic and thermal Enthalpies=-2294.089396

Sum of electronic and thermal Free Energies=-2294.192440

### Cartesian coordinate

|   |             |             |             |
|---|-------------|-------------|-------------|
| N | -2.41654900 | -2.65848600 | -1.19622700 |
| C | -1.24107200 | -2.09492600 | -1.51653900 |
| C | -1.10482000 | -0.70961000 | -1.62794100 |
| C | -2.19091400 | 0.12584900  | -1.37068500 |
| C | -3.40470400 | -0.46973400 | -1.03945000 |
| C | -3.46004100 | -1.86109400 | -0.98244500 |
| C | -1.96894700 | 1.63523500  | -1.31358500 |
| C | -1.36319000 | 1.91052800  | 0.09161600  |
| C | 0.04259400  | 1.73579100  | 0.14872400  |
| O | 0.62544700  | 2.74824600  | -0.39026500 |
| C | -0.07268300 | -3.00983700 | -1.64667100 |

|   |             |             |             |
|---|-------------|-------------|-------------|
| C | 1.13278100  | -2.60152300 | -2.22970700 |
| C | 2.21689100  | -3.47203900 | -2.29764000 |
| C | 2.11828400  | -4.75804500 | -1.77026100 |
| C | 0.92350600  | -5.17227800 | -1.18576600 |
| C | -0.16424500 | -4.30837800 | -1.12984700 |
| H | -0.14202600 | -0.27168300 | -1.88262500 |
| H | -4.28555000 | 0.12757400  | -0.83038100 |
| H | -4.39595000 | -2.35666000 | -0.73426600 |
| H | -1.21899000 | 1.88804700  | -2.07471400 |
| H | 1.23234200  | -1.61182800 | -2.66601800 |
| H | 3.13943000  | -3.13667100 | -2.76020300 |
| H | 2.96411900  | -5.43571400 | -1.82441100 |
| H | 0.83527200  | -6.17369500 | -0.77760300 |
| H | -1.10388400 | -4.62870400 | -0.69256700 |
| C | -3.22074900 | 2.44577200  | -1.59444500 |
| C | -3.90939700 | 2.20831900  | -2.78998000 |
| C | -3.70027400 | 3.41930700  | -0.72147000 |
| C | -5.05307700 | 2.93124900  | -3.10310800 |
| H | -3.54510800 | 1.44756500  | -3.47625000 |
| C | -4.85080000 | 4.14422800  | -1.03370000 |
| H | -3.17311600 | 3.62221300  | 0.20562000  |
| C | -5.52886900 | 3.90264700  | -2.22230800 |
| H | -5.57387100 | 2.73821000  | -4.03513100 |
| H | -5.21383800 | 4.89823500  | -0.34303200 |
| H | -6.42289400 | 4.46697300  | -2.46528100 |
| H | -2.00147700 | 1.52916300  | 0.88330100  |
| C | 5.29517000  | 1.69203800  | 0.18319000  |
| C | 3.94251200  | 1.96895700  | 0.35876600  |
| C | 3.49899200  | 2.84338600  | 1.34748500  |
| C | 4.44336400  | 3.43565100  | 2.17884300  |
| C | 5.80341600  | 3.15858100  | 2.01244100  |
| C | 6.23855000  | 2.29231800  | 1.01420300  |
| C | 5.53038800  | 0.74692000  | -0.96496600 |
| C | 4.12273200  | 0.33726300  | -1.46052100 |
| C | 3.09794600  | 1.21461000  | -0.63965700 |
| H | 2.44278200  | 3.07144100  | 1.46087000  |
| H | 4.12440400  | 4.12130500  | 2.95629500  |
| H | 6.52865300  | 3.62853500  | 2.66834100  |
| H | 7.29659900  | 2.08723500  | 0.88502000  |
| H | 6.10440300  | -0.14071300 | -0.67956000 |
| H | 3.99567700  | 0.55727700  | -2.52044200 |
| H | 6.08715400  | 1.23428600  | -1.77019600 |
| H | 2.52025200  | 1.86695700  | -1.29168100 |
| N | 2.12324800  | 0.34489000  | 0.06704300  |

|    |             |             |             |
|----|-------------|-------------|-------------|
| O  | 3.88117000  | -1.05448900 | -1.36649300 |
| C  | 0.88605300  | 0.59968700  | 0.55035300  |
| C  | 2.43513600  | -0.92469500 | 0.44637600  |
| N  | 0.52540600  | -0.50574500 | 1.21595100  |
| N  | 1.47691100  | -1.45964700 | 1.15656300  |
| C  | 3.71035600  | -1.52318800 | -0.04702000 |
| H  | 4.54783500  | -1.24394600 | 0.60687200  |
| H  | 3.61570100  | -2.60923100 | -0.07916300 |
| C  | -0.68585400 | -0.76072500 | 1.93203700  |
| C  | -1.18232700 | 0.19701100  | 2.81040600  |
| C  | -1.31365900 | -1.98619600 | 1.73624400  |
| C  | -2.37791300 | -0.05594300 | 3.46987600  |
| C  | -2.50851400 | -2.23458200 | 2.39639100  |
| C  | -3.03524400 | -1.26467900 | 3.24762400  |
| H  | -2.79159800 | 0.66993900  | 4.15946900  |
| H  | -3.03141600 | -3.17178500 | 2.24507000  |
| H  | -0.88019700 | -2.72272700 | 1.06815700  |
| H  | -0.64308000 | 1.12258900  | 2.98848900  |
| Cl | -4.53353900 | -1.57196900 | 4.06047700  |
| H  | -0.56579100 | 3.12490200  | -0.32249000 |

Variable frequencies

|            |          |          |
|------------|----------|----------|
| -2284.1302 | 23.2113  | 26.1642  |
| 27.8639    | 33.2171  | 36.8953  |
| 38.1804    | 48.7925  | 52.2056  |
| 65.2857    | 75.3632  | 80.2504  |
| 91.1249    | 99.9884  | 116.3746 |
| 127.6673   | 128.1350 | 140.6954 |
| 145.5380   | 158.1431 | 171.9626 |
| 211.9281   | 219.7009 | 223.9135 |
| 235.5769   | 240.7219 | 243.7638 |
| 269.3009   | 276.5617 | 285.3574 |
| 300.2043   | 311.3362 | 346.7717 |
| 360.4083   | 363.2690 | 377.4674 |
| 402.4606   | 415.6329 | 416.5547 |
| 420.5683   | 425.8450 | 435.1138 |
| 438.5165   | 453.7287 | 459.0875 |
| 474.4265   | 480.2530 | 485.9117 |
| 501.5235   | 511.5007 | 525.0236 |
| 530.3911   | 569.4029 | 590.7307 |
| 598.6313   | 607.4581 | 623.8363 |
| 629.7560   | 632.0764 | 641.2140 |
| 646.7286   | 651.5140 | 662.4234 |
| 674.8374   | 700.2415 | 712.6609 |

|           |           |           |
|-----------|-----------|-----------|
| 715.4749  | 719.6411  | 726.0070  |
| 727.7864  | 749.1139  | 757.5525  |
| 765.3151  | 768.5454  | 780.4952  |
| 788.6239  | 806.3073  | 812.0260  |
| 829.0615  | 841.8810  | 852.1677  |
| 858.3439  | 871.9436  | 872.6785  |
| 874.1813  | 875.3145  | 879.4584  |
| 881.0176  | 896.9565  | 910.8867  |
| 925.4996  | 928.6461  | 936.9038  |
| 952.4848  | 958.3421  | 965.8673  |
| 988.9670  | 990.4044  | 1000.0882 |
| 1007.2196 | 1011.3464 | 1015.2310 |
| 1016.4235 | 1019.4820 | 1022.0139 |
| 1024.0868 | 1026.6748 | 1028.1595 |
| 1029.7097 | 1033.6868 | 1036.0928 |
| 1057.7047 | 1065.4965 | 1071.5521 |
| 1072.5752 | 1077.6373 | 1083.7609 |
| 1093.8369 | 1123.8012 | 1128.0094 |
| 1128.2121 | 1139.4171 | 1145.8403 |
| 1146.0959 | 1153.7554 | 1163.8499 |
| 1174.3222 | 1185.0905 | 1187.4942 |
| 1190.7911 | 1193.1327 | 1205.5237 |
| 1207.2136 | 1209.0063 | 1216.3066 |
| 1224.6912 | 1225.9231 | 1235.2290 |
| 1242.6309 | 1252.5993 | 1263.6678 |
| 1276.6044 | 1284.7805 | 1301.0645 |
| 1315.3765 | 1317.7994 | 1323.2768 |
| 1326.2510 | 1327.8848 | 1336.7397 |
| 1339.6928 | 1349.8978 | 1352.7269 |
| 1354.6806 | 1356.2287 | 1366.8734 |
| 1370.4633 | 1371.2587 | 1377.8314 |
| 1381.6420 | 1417.0348 | 1425.6796 |
| 1455.5464 | 1468.5827 | 1474.7535 |
| 1485.1536 | 1495.0350 | 1502.2428 |
| 1505.9782 | 1509.0511 | 1520.4177 |
| 1532.7498 | 1541.8632 | 1546.5288 |
| 1554.4636 | 1560.4125 | 1562.5453 |
| 1592.4313 | 1654.9300 | 1662.1070 |
| 1673.0471 | 1680.5004 | 1683.7488 |
| 1685.4304 | 1685.8823 | 1687.2542 |
| 1698.2328 | 1702.5991 | 1703.9998 |
| 1972.8728 | 3072.1720 | 3075.1756 |
| 3098.9427 | 3140.8390 | 3167.3888 |
| 3185.2660 | 3188.6744 | 3193.1909 |

|           |           |           |
|-----------|-----------|-----------|
| 3198.5030 | 3203.4109 | 3204.0108 |
| 3204.4413 | 3205.3247 | 3210.2465 |
| 3213.2392 | 3218.5410 | 3218.5988 |
| 3219.0817 | 3222.4402 | 3225.8043 |
| 3225.9137 | 3232.2756 | 3233.3893 |
| 3238.6289 | 3239.0115 | 3239.4084 |
| 3241.4317 | 3253.2182 | 3266.2445 |

## TS8R<sup>H</sup>

Zero-point correction=0.626372

Thermal correction to Energy=0.662956

Thermal correction to Enthalpy=0.663900

Thermal correction to Gibbs Free Energy=0.555526

Sum of electronic and zero-point Energies=-2370.560782

Sum of electronic and thermal Energies=-2370.524199

Sum of electronic and thermal Enthalpies=-2370.523255

Sum of electronic and thermal Free Energies=-2370.631629

### Cartesian coordinate

|   |             |             |             |
|---|-------------|-------------|-------------|
| N | 4.54139900  | 0.57868200  | -0.44748500 |
| C | 3.99724800  | 0.29847300  | 0.74469800  |
| C | 2.73446500  | 0.78042900  | 1.11224300  |
| C | 2.02609700  | 1.59331700  | 0.23257100  |
| C | 2.60146400  | 1.88290200  | -1.00371300 |
| C | 3.85236600  | 1.34692200  | -1.28976400 |
| C | 0.63440100  | 2.09330900  | 0.59627400  |
| C | -0.39142200 | 1.11986100  | 0.01765200  |
| C | -0.89375100 | 0.07030700  | 0.79351600  |
| O | -1.11544600 | 0.07850500  | 2.03503800  |
| C | 4.77377900  | -0.60900700 | 1.63197400  |
| C | 4.55034700  | -0.65982700 | 3.01235100  |
| C | 5.27252500  | -1.53882000 | 3.81244100  |
| C | 6.22619800  | -2.38042900 | 3.24476200  |
| C | 6.46186300  | -2.33015700 | 1.87274200  |
| C | 5.74575500  | -1.44729700 | 1.07220000  |
| H | 2.29348600  | 0.50652600  | 2.06643400  |
| H | 2.09583800  | 2.52185700  | -1.72110300 |
| H | 4.32685400  | 1.54648000  | -2.24810300 |
| H | 0.54957000  | 2.04670600  | 1.68930400  |
| H | 3.83147300  | 0.00961200  | 3.47438000  |
| H | 5.09653500  | -1.55968400 | 4.88297800  |
| H | 6.78923100  | -3.06536100 | 3.87028800  |
| H | 7.20840500  | -2.97828000 | 1.42535200  |

|   |             |             |             |
|---|-------------|-------------|-------------|
| H | 5.93360000  | -1.38654000 | 0.00471000  |
| C | 0.43753300  | 3.54172800  | 0.16943000  |
| C | 1.19497600  | 4.52888700  | 0.80836000  |
| C | -0.44030300 | 3.92149100  | -0.84516300 |
| C | 1.07071100  | 5.86410000  | 0.44763300  |
| H | 1.88974100  | 4.24042000  | 1.59361900  |
| C | -0.56477500 | 5.26212100  | -1.21222800 |
| H | -1.03391300 | 3.17237700  | -1.36375100 |
| C | 0.18837800  | 6.23538500  | -0.56696900 |
| H | 1.66216900  | 6.61799400  | 0.95670100  |
| H | -1.24890700 | 5.54140400  | -2.00713500 |
| H | 0.09285400  | 7.27777500  | -0.85188700 |
| H | -0.33280100 | 0.94973900  | -1.05528700 |
| C | -6.02878300 | -0.61171200 | 0.69421500  |
| C | -4.70570300 | -0.23721700 | 0.48207100  |
| C | -4.37801900 | 0.86712900  | -0.30205500 |
| C | -5.41080400 | 1.63209700  | -0.83955600 |
| C | -6.74223700 | 1.28304600  | -0.59806200 |
| C | -7.05930100 | 0.15670600  | 0.15756200  |
| C | -6.11675500 | -1.87799900 | 1.50760200  |
| C | -4.66410700 | -2.40076600 | 1.61405200  |
| C | -3.76318900 | -1.18332800 | 1.19106900  |
| H | -3.34086200 | 1.09942600  | -0.54196600 |
| H | -5.18173200 | 2.49198100  | -1.45983500 |
| H | -7.53768400 | 1.88548200  | -1.02340900 |
| H | -8.09593100 | -0.12387400 | 0.31558700  |
| H | -6.75215800 | -2.63917300 | 1.04474200  |
| H | -4.41906100 | -2.70707000 | 2.63076700  |
| H | -6.52409300 | -1.68257800 | 2.50444100  |
| H | -3.27329900 | -0.73454000 | 2.05718500  |
| N | -2.69641500 | -1.62604000 | 0.29001900  |
| O | -4.43149700 | -3.56444800 | 0.83789400  |
| C | -1.48277500 | -1.10570900 | 0.05265800  |
| C | -2.90933400 | -2.60390600 | -0.63798200 |
| N | -0.99331400 | -1.80443000 | -0.97124600 |
| N | -1.87161300 | -2.74577400 | -1.41428500 |
| C | -4.19967400 | -3.35536200 | -0.54020400 |
| H | -5.01003400 | -2.78799800 | -1.01864100 |
| H | -4.11050700 | -4.32968900 | -1.01971900 |
| C | 0.32237300  | -1.72985500 | -1.54092800 |
| C | 0.44099900  | -1.56802700 | -2.91606100 |
| C | 1.42865500  | -1.86500400 | -0.70979700 |
| C | 1.71111800  | -1.51898100 | -3.47527200 |
| C | 2.69688700  | -1.83255300 | -1.27515400 |

|    |             |             |             |
|----|-------------|-------------|-------------|
| C  | 2.82552000  | -1.64757300 | -2.64867500 |
| H  | 1.83956000  | -1.38623100 | -4.54294000 |
| H  | 3.57882700  | -1.95028800 | -0.65575400 |
| H  | 1.30791500  | -2.01751200 | 0.35870100  |
| H  | -0.44572000 | -1.48703800 | -3.53516300 |
| Cl | 4.41250600  | -1.58169000 | -3.34550700 |
| H  | -1.86153100 | 1.62185900  | 2.16592800  |
| O  | -2.10531300 | 2.38076600  | 1.55336300  |
| H  | -1.57003700 | 1.95109900  | 0.63736200  |
| H  | -3.06911500 | 2.42011000  | 1.43149100  |

Variable frequencies

|           |          |          |
|-----------|----------|----------|
| -945.0186 | 10.6272  | 23.7763  |
| 30.0788   | 31.1039  | 37.1756  |
| 42.1187   | 47.0589  | 54.7694  |
| 56.1949   | 60.0429  | 72.6320  |
| 78.5463   | 88.4212  | 97.4630  |
| 108.2169  | 114.6077 | 133.2998 |
| 141.1672  | 156.4670 | 161.7978 |
| 178.6939  | 183.2580 | 208.2720 |
| 221.7260  | 226.5745 | 233.0757 |
| 239.7709  | 251.3398 | 261.1810 |
| 267.4747  | 274.7046 | 304.7724 |
| 309.0452  | 333.1676 | 351.7098 |
| 358.6697  | 385.9762 | 398.1518 |
| 413.0863  | 416.2507 | 418.8890 |
| 425.4425  | 426.9161 | 433.9291 |
| 440.7293  | 453.1993 | 473.3872 |
| 475.7832  | 482.5933 | 486.1350 |
| 490.5568  | 516.7570 | 525.1311 |
| 532.8287  | 553.4570 | 561.8144 |
| 593.2754  | 609.3892 | 615.1468 |
| 618.9793  | 625.1160 | 627.4084 |
| 632.5031  | 644.5387 | 650.0499 |
| 656.1124  | 673.5555 | 701.1849 |
| 710.6834  | 718.2848 | 722.9673 |
| 725.0412  | 725.7897 | 736.9373 |
| 752.0858  | 766.0475 | 768.1816 |
| 773.9922  | 783.4256 | 793.4807 |
| 804.2480  | 817.0976 | 825.3186 |
| 839.5692  | 841.2165 | 852.9477 |
| 861.8826  | 866.8880 | 874.5838 |
| 878.8778  | 881.4800 | 882.6806 |
| 893.2062  | 909.5052 | 915.0352 |



|           |           |           |
|-----------|-----------|-----------|
| 922.5757  | 927.0547  | 954.9934  |
| 961.4690  | 962.5131  | 971.3439  |
| 989.0479  | 996.0220  | 999.7498  |
| 1010.0189 | 1011.5556 | 1015.9913 |
| 1019.4485 | 1021.1823 | 1024.1438 |
| 1026.6284 | 1029.6286 | 1030.7438 |
| 1031.7963 | 1050.0142 | 1052.7474 |
| 1059.3714 | 1060.8760 | 1069.0887 |
| 1071.9742 | 1076.5454 | 1092.0538 |
| 1097.3747 | 1117.9397 | 1122.9890 |
| 1127.5597 | 1136.3230 | 1137.2190 |
| 1138.6413 | 1154.7865 | 1161.2144 |
| 1181.9907 | 1182.2032 | 1186.8259 |
| 1199.2961 | 1200.3494 | 1203.7185 |
| 1204.7412 | 1215.0881 | 1217.6154 |
| 1228.2965 | 1233.8410 | 1251.0807 |
| 1252.7375 | 1278.9681 | 1280.8266 |
| 1287.5504 | 1299.9621 | 1307.3843 |
| 1308.9589 | 1318.1798 | 1318.8271 |
| 1320.6130 | 1327.7545 | 1336.8980 |
| 1341.9389 | 1350.5167 | 1354.3312 |
| 1356.3002 | 1357.4620 | 1364.8925 |
| 1367.2579 | 1375.6996 | 1378.0351 |
| 1381.7250 | 1419.0552 | 1455.9266 |
| 1465.5329 | 1472.7657 | 1480.3080 |
| 1487.8864 | 1501.9195 | 1502.8750 |
| 1505.3695 | 1515.9112 | 1535.5820 |
| 1538.3856 | 1543.9032 | 1546.6869 |
| 1553.6192 | 1559.1728 | 1596.6107 |
| 1614.3971 | 1644.8837 | 1653.1468 |
| 1675.2614 | 1675.3596 | 1681.8745 |
| 1682.3646 | 1685.2437 | 1686.5283 |
| 1687.9711 | 1697.8060 | 1698.7398 |
| 1702.4882 | 1812.3290 | 3071.2139 |
| 3083.0236 | 3093.1428 | 3139.7892 |
| 3161.3826 | 3172.1317 | 3182.4078 |
| 3186.3293 | 3188.5882 | 3189.3315 |
| 3193.0027 | 3197.1494 | 3199.8056 |
| 3201.1389 | 3205.1769 | 3206.0777 |
| 3211.1031 | 3211.4511 | 3216.0977 |
| 3217.4448 | 3218.7130 | 3219.2394 |
| 3223.9336 | 3224.1287 | 3227.8493 |
| 3230.8242 | 3235.1064 | 3238.8101 |
| 3239.9559 | 3250.2757 | 3797.9164 |

## TS8R<sup>M</sup>

Zero-point correction=0.655336  
Thermal correction to Energy=0.693834  
Thermal correction to Enthalpy=0.694779  
Thermal correction to Gibbs Free Energy=0.580366  
Sum of electronic and zero-point Energies=-2409.815490  
Sum of electronic and thermal Energies=-2409.776992  
Sum of electronic and thermal Enthalpies=-2409.776048  
Sum of electronic and thermal Free Energies=-2409.890461

### Cartesian coordinate

|   |             |             |             |
|---|-------------|-------------|-------------|
| N | 4.53824800  | 0.53539800  | -0.84153200 |
| C | 4.15427200  | 0.49634200  | 0.44095100  |
| C | 2.90106100  | 0.97015600  | 0.85256700  |
| C | 2.03428600  | 1.52369000  | -0.08357300 |
| C | 2.44503600  | 1.56523500  | -1.41606100 |
| C | 3.69632600  | 1.05259000  | -1.73636700 |
| C | 0.66089400  | 2.02650900  | 0.33314000  |
| C | -0.39251900 | 0.99548900  | -0.06118100 |
| C | -0.85528400 | 0.04530500  | 0.85706900  |
| O | -1.00904600 | 0.16705200  | 2.09682900  |
| C | 5.10160700  | -0.13551000 | 1.39785900  |
| C | 5.04901100  | 0.12865500  | 2.77078600  |
| C | 5.93363300  | -0.49545700 | 3.64366700  |
| C | 6.88099000  | -1.39362900 | 3.15747500  |
| C | 6.94536400  | -1.65691800 | 1.79101600  |
| C | 6.06618200  | -1.02920200 | 0.91589100  |
| H | 2.59260700  | 0.88836600  | 1.89057000  |
| H | 1.81144800  | 1.99975900  | -2.18370000 |
| H | 4.04457500  | 1.06079400  | -2.76700900 |
| H | 0.65672100  | 2.09174500  | 1.42814400  |
| H | 4.33575100  | 0.84728200  | 3.16237900  |
| H | 5.88945000  | -0.27308500 | 4.70484300  |
| H | 7.57039200  | -1.87971700 | 3.84006300  |
| H | 7.68398400  | -2.35178400 | 1.40481300  |
| H | 6.11537700  | -1.21494800 | -0.15253600 |
| C | 0.40139000  | 3.42488400  | -0.21776400 |
| C | 1.16611000  | 4.48850100  | 0.27104400  |
| C | -0.56164700 | 3.68553800  | -1.19342600 |
| C | 0.96257500  | 5.78241200  | -0.19197000 |
| H | 1.92848200  | 4.29463500  | 1.02187300  |
| C | -0.76766000 | 4.98450100  | -1.66182300 |

|    |             |             |             |
|----|-------------|-------------|-------------|
| H  | -1.15687900 | 2.87219700  | -1.60249400 |
| C  | -0.00909500 | 6.03557900  | -1.16043300 |
| H  | 1.56180000  | 6.59648200  | 0.20264300  |
| H  | -1.51750800 | 5.16852900  | -2.42482700 |
| H  | -0.16718800 | 7.04546400  | -1.52376900 |
| H  | -0.39896900 | 0.69670200  | -1.10771000 |
| C  | -6.01547100 | -0.69709600 | 0.54268700  |
| C  | -4.68695600 | -0.33236600 | 0.34270100  |
| C  | -4.32183700 | 0.57842700  | -0.64533300 |
| C  | -5.32491600 | 1.15267400  | -1.42186800 |
| C  | -6.66265300 | 0.80817800  | -1.21097800 |
| C  | -7.01662000 | -0.11965000 | -0.23449200 |
| C  | -6.13956000 | -1.73250100 | 1.63154900  |
| C  | -4.69249200 | -2.19103100 | 1.92456300  |
| C  | -3.77689700 | -1.07678900 | 1.29502600  |
| H  | -3.27579400 | 0.82790300  | -0.82285100 |
| H  | -5.06766700 | 1.86292600  | -2.20047200 |
| H  | -7.43364500 | 1.26004900  | -1.82605700 |
| H  | -8.05620200 | -0.39652400 | -0.08983900 |
| H  | -6.75070100 | -2.59251500 | 1.34322100  |
| H  | -4.49971100 | -2.27413900 | 2.99397500  |
| H  | -6.59009500 | -1.30442400 | 2.53264800  |
| H  | -3.32787400 | -0.44354500 | 2.06353200  |
| N  | -2.67109300 | -1.69287200 | 0.55974900  |
| O  | -4.41031800 | -3.48682200 | 1.42115500  |
| C  | -1.45285800 | -1.21600800 | 0.26986800  |
| C  | -2.85236200 | -2.82929300 | -0.17521200 |
| N  | -0.93211000 | -2.08255000 | -0.59813500 |
| N  | -1.79347700 | -3.10048800 | -0.88383300 |
| C  | -4.13643100 | -3.56705800 | 0.03648900  |
| H  | -4.93876400 | -3.13126300 | -0.57479400 |
| H  | -4.01829900 | -4.61876500 | -0.22340100 |
| C  | 0.39144800  | -2.09840300 | -1.15248100 |
| C  | 0.52642800  | -2.25972700 | -2.52613900 |
| C  | 1.48856100  | -2.01271100 | -0.30294100 |
| C  | 1.80250200  | -2.32716800 | -3.06896200 |
| C  | 2.76385800  | -2.09676800 | -0.84777300 |
| C  | 2.90781400  | -2.24752000 | -2.22429100 |
| H  | 1.94285400  | -2.44907900 | -4.13642900 |
| H  | 3.63983900  | -2.05761700 | -0.21011900 |
| H  | 1.35248800  | -1.91268100 | 0.76981000  |
| H  | -0.35336000 | -2.33781100 | -3.15519500 |
| Cl | 4.50037500  | -2.35074700 | -2.90265000 |
| H  | -1.84378500 | 1.87114400  | 2.15829700  |

|   |             |            |            |
|---|-------------|------------|------------|
| C | -3.19481000 | 3.20297200 | 1.28941400 |
| H | -3.11058800 | 3.80741000 | 0.38748100 |
| H | -4.01404900 | 2.48835000 | 1.20836800 |
| H | -3.30520800 | 3.84358700 | 2.16209300 |
| O | -1.92953800 | 2.51296000 | 1.41698700 |
| H | -1.52129600 | 1.91834900 | 0.55380900 |

Variable frequencies

|           |           |           |
|-----------|-----------|-----------|
| -624.8782 | 2.0593    | 24.1701   |
| 28.5923   | 30.8644   | 37.9504   |
| 41.7215   | 44.2012   | 50.3160   |
| 54.8442   | 65.8377   | 69.8496   |
| 70.2984   | 84.0286   | 88.9609   |
| 97.0132   | 103.2361  | 110.3543  |
| 119.5259  | 130.9978  | 149.2927  |
| 155.4297  | 160.8577  | 172.1165  |
| 188.0607  | 195.8877  | 208.8764  |
| 220.0309  | 221.6161  | 232.0863  |
| 238.7243  | 247.4554  | 256.2841  |
| 264.0492  | 269.4442  | 287.0287  |
| 308.4429  | 325.6709  | 351.4592  |
| 358.1485  | 381.8991  | 390.3471  |
| 410.3793  | 418.1932  | 418.9511  |
| 422.9360  | 427.0791  | 434.3444  |
| 441.5380  | 450.7817  | 471.8506  |
| 482.5215  | 487.4569  | 490.2297  |
| 518.6737  | 526.5474  | 536.1114  |
| 558.4895  | 571.0103  | 593.2035  |
| 609.3945  | 612.8423  | 624.7409  |
| 628.2273  | 630.9599  | 643.2154  |
| 650.9884  | 657.8824  | 673.0166  |
| 691.3788  | 708.3138  | 718.1065  |
| 725.0245  | 726.1191  | 728.3863  |
| 734.4573  | 751.8091  | 761.0201  |
| 765.2831  | 771.6683  | 775.8641  |
| 791.3742  | 803.3930  | 804.2181  |
| 822.8151  | 841.2929  | 845.6284  |
| 847.8918  | 852.7673  | 864.5091  |
| 865.0596  | 878.4029  | 882.4343  |
| 883.1367  | 884.2699  | 895.8143  |
| 910.5302  | 915.9170  | 920.4428  |
| 932.7800  | 957.4735  | 959.8084  |
| 962.8375  | 978.5272  | 987.7619  |
| 999.6585  | 1004.7329 | 1008.4295 |

|           |           |           |
|-----------|-----------|-----------|
| 1014.0029 | 1015.9634 | 1017.5085 |
| 1020.8965 | 1023.7639 | 1025.5058 |
| 1029.3237 | 1030.8674 | 1032.0167 |
| 1048.7134 | 1052.2009 | 1055.8023 |
| 1061.0180 | 1070.6127 | 1071.4541 |
| 1074.2531 | 1092.2238 | 1098.8219 |
| 1115.5682 | 1121.7295 | 1122.2882 |
| 1127.9862 | 1136.1457 | 1136.6120 |
| 1147.1419 | 1151.3717 | 1158.0027 |
| 1172.1153 | 1183.4818 | 1183.7278 |
| 1185.3031 | 1196.2229 | 1199.3236 |
| 1200.8457 | 1207.7142 | 1209.5936 |
| 1216.5271 | 1225.2570 | 1226.5414 |
| 1232.9878 | 1245.0799 | 1250.6507 |
| 1273.9772 | 1278.4551 | 1282.2238 |
| 1296.8398 | 1303.1839 | 1316.1196 |
| 1318.8739 | 1321.5489 | 1326.3940 |
| 1332.3979 | 1337.9153 | 1347.2014 |
| 1349.8707 | 1352.8581 | 1357.1196 |
| 1364.2557 | 1370.2704 | 1373.4476 |
| 1376.6786 | 1377.3315 | 1418.3961 |
| 1420.5055 | 1458.7238 | 1465.3487 |
| 1471.1749 | 1484.0244 | 1486.9625 |
| 1496.9277 | 1497.2378 | 1502.3584 |
| 1502.6661 | 1505.1197 | 1517.9745 |
| 1529.2105 | 1535.4544 | 1538.4600 |
| 1543.5673 | 1547.8197 | 1551.0213 |
| 1563.9499 | 1596.0440 | 1645.9337 |
| 1653.3019 | 1674.5266 | 1674.7421 |
| 1677.8964 | 1683.3779 | 1684.6649 |
| 1686.5598 | 1687.9677 | 1700.2997 |
| 1700.8737 | 1701.3195 | 1833.9853 |
| 3076.5823 | 3080.3897 | 3091.8981 |
| 3111.8627 | 3145.0017 | 3153.3068 |
| 3169.2631 | 3176.1107 | 3188.2302 |
| 3188.4595 | 3192.2719 | 3194.3891 |
| 3199.2994 | 3203.3620 | 3207.6547 |
| 3208.7116 | 3211.9259 | 3212.0897 |
| 3215.2528 | 3216.1280 | 3220.0562 |
| 3221.2491 | 3222.1461 | 3222.7091 |
| 3228.1223 | 3228.2028 | 3233.0977 |
| 3235.0044 | 3237.1255 | 3239.1621 |
| 3250.1036 | 3252.4095 | 3556.3077 |

## TS8R<sup>P</sup>

Zero-point correction=0.749514

Thermal correction to Energy=0.793357

Thermal correction to Enthalpy=0.794301

Thermal correction to Gibbs Free Energy=0.668773

Sum of electronic and zero-point Energies=-2640.962628

Sum of electronic and thermal Energies=-2640.918786

Sum of electronic and thermal Enthalpies=-2640.917841

Sum of electronic and thermal Free Energies=-2641.043370

### Cartesian coordinate

|   |             |             |             |
|---|-------------|-------------|-------------|
| N | -4.96002500 | 0.89310600  | -0.46928400 |
| C | -4.09228600 | 0.33111700  | -1.32632500 |
| C | -2.73750500 | 0.67351300  | -1.32881100 |
| C | -2.25968100 | 1.63551100  | -0.44074400 |
| C | -3.16763400 | 2.22641900  | 0.43195700  |
| C | -4.49845600 | 1.81275200  | 0.37565500  |
| C | -0.76232500 | 1.92560200  | -0.42667100 |
| C | -0.07037800 | 0.79904500  | 0.35437300  |
| C | 0.40298600  | -0.31499200 | -0.35992600 |
| O | 0.83638600  | -0.29775300 | -1.54220300 |
| C | -4.62564800 | -0.71468400 | -2.23941900 |
| C | -3.97132200 | -1.03875500 | -3.43335300 |
| C | -4.46866400 | -2.03711700 | -4.26354700 |
| C | -5.62704200 | -2.72565200 | -3.91224200 |
| C | -6.29210200 | -2.40087400 | -2.73174500 |
| C | -5.79910800 | -1.39902900 | -1.90302700 |
| H | -2.04343500 | 0.17491200  | -2.00060500 |
| H | -2.86080600 | 2.99180700  | 1.13652700  |
| H | -5.23009500 | 2.24692200  | 1.05321600  |
| H | -0.42793400 | 1.85381200  | -1.46709100 |
| H | -3.08686200 | -0.48797300 | -3.73814900 |
| H | -3.95729200 | -2.26923300 | -5.19202500 |
| H | -6.01541400 | -3.50407200 | -4.56074000 |
| H | -7.20003400 | -2.92800400 | -2.45735500 |
| H | -6.31992200 | -1.12723300 | -0.99091200 |
| C | -0.41577500 | 3.31997700  | 0.06177400  |
| C | -0.27269200 | 4.34961400  | -0.87094200 |
| C | -0.25475100 | 3.61272200  | 1.41849900  |
| C | 0.01149300  | 5.64989100  | -0.45801600 |
| H | -0.39203800 | 4.13191500  | -1.92979900 |
| C | 0.02612200  | 4.91156800  | 1.83459500  |
| H | -0.34919600 | 2.82338200  | 2.15987400  |

|    |             |             |             |
|----|-------------|-------------|-------------|
| C  | 0.15715300  | 5.93456400  | 0.89748400  |
| H  | 0.11827000  | 6.43832100  | -1.19626100 |
| H  | 0.14481100  | 5.12440600  | 2.89196700  |
| H  | 0.37681300  | 6.94622900  | 1.22194700  |
| H  | -0.44907000 | 0.61627700  | 1.35648800  |
| C  | 5.11803200  | -2.74291100 | -0.30274400 |
| C  | 4.03208200  | -1.90377300 | -0.06643800 |
| C  | 4.14770300  | -0.76628200 | 0.72493400  |
| C  | 5.38939900  | -0.47213600 | 1.28316700  |
| C  | 6.48615300  | -1.30379400 | 1.04343000  |
| C  | 6.35910500  | -2.44262000 | 0.25157600  |
| C  | 4.73222500  | -3.90059300 | -1.18727500 |
| C  | 3.18976300  | -3.86182200 | -1.25700000 |
| C  | 2.80162100  | -2.40992000 | -0.78496400 |
| H  | 3.29705500  | -0.11690200 | 0.91492100  |
| H  | 5.50341100  | 0.40657500  | 1.90989700  |
| H  | 7.44703800  | -1.06326500 | 1.48614600  |
| H  | 7.21290900  | -3.08944700 | 0.07515900  |
| H  | 5.06273500  | -4.87114800 | -0.80620700 |
| H  | 2.82018100  | -4.03486800 | -2.26763000 |
| H  | 5.15800600  | -3.78413600 | -2.18896700 |
| H  | 2.51123800  | -1.78532000 | -1.62897000 |
| N  | 1.64419100  | -2.46870800 | 0.12537300  |
| O  | 2.58320900  | -4.88573300 | -0.48480800 |
| C  | 0.63293000  | -1.61541900 | 0.36263500  |
| C  | 1.52893800  | -3.48621400 | 1.02864600  |
| N  | -0.06270900 | -2.15761100 | 1.36607800  |
| N  | 0.48345100  | -3.32410800 | 1.79163600  |
| C  | 2.48615100  | -4.62717900 | 0.90080200  |
| H  | 3.45555400  | -4.37736900 | 1.35244700  |
| H  | 2.07922500  | -5.51493500 | 1.38433500  |
| C  | -1.30247700 | -1.70820400 | 1.93792300  |
| C  | -1.33462400 | -1.41492400 | 3.29584100  |
| C  | -2.42439900 | -1.59961000 | 1.12470600  |
| C  | -2.52546500 | -0.96767500 | 3.85376000  |
| C  | -3.61616900 | -1.16029400 | 1.68798700  |
| C  | -3.65005600 | -0.83591500 | 3.04149600  |
| H  | -2.58341200 | -0.72090500 | 4.90707600  |
| H  | -4.51018400 | -1.06734100 | 1.08176900  |
| H  | -2.38088300 | -1.86228900 | 0.07216500  |
| H  | -0.44191000 | -1.53034700 | 3.90099900  |
| Cl | -5.13184100 | -0.25800200 | 3.73271700  |
| H  | 1.23941200  | 1.31221800  | 0.40970000  |
| C  | 2.58718500  | 2.34662900  | -0.86517600 |

|   |            |            |             |
|---|------------|------------|-------------|
| O | 2.29068900 | 1.92475900 | 0.28381800  |
| O | 2.09615400 | 1.84733100 | -1.94791300 |
| H | 1.53253000 | 0.98997300 | -1.82103000 |
| C | 3.61872100 | 3.43791700 | -1.02057600 |
| C | 3.31186700 | 4.29046500 | -2.25615200 |
| H | 4.08780500 | 5.05334300 | -2.35819900 |
| H | 3.29563200 | 3.68687500 | -3.16522800 |
| H | 2.34712700 | 4.79431800 | -2.15007200 |
| C | 3.64370200 | 4.29956500 | 0.24351800  |
| H | 3.90585400 | 3.70666800 | 1.12203400  |
| H | 4.38812100 | 5.09013600 | 0.11958900  |
| H | 2.66759000 | 4.76308700 | 0.41731400  |
| C | 4.96373800 | 2.70349400 | -1.20603800 |
| H | 5.75733700 | 3.44874100 | -1.30475400 |
| H | 5.19065700 | 2.06614500 | -0.34612300 |
| H | 4.95353500 | 2.08731000 | -2.10919900 |

Variable frequencies

|            |          |          |
|------------|----------|----------|
| -1259.5327 | 7.2653   | 18.8135  |
| 19.4661    | 24.6452  | 26.7519  |
| 30.1250    | 41.4629  | 43.7292  |
| 46.7359    | 48.5993  | 59.4412  |
| 60.1735    | 72.6740  | 77.8416  |
| 81.8101    | 87.0479  | 93.8391  |
| 103.6762   | 110.1703 | 112.9868 |
| 120.3291   | 134.4851 | 141.4748 |
| 155.6875   | 163.5046 | 175.6690 |
| 198.3498   | 209.4377 | 224.1247 |
| 228.7391   | 232.7375 | 235.6855 |
| 241.4336   | 243.7319 | 258.1937 |
| 263.3237   | 269.0310 | 278.5089 |
| 286.3087   | 298.2534 | 301.4902 |
| 311.4930   | 323.5779 | 347.6842 |
| 358.1765   | 363.5898 | 369.2032 |
| 383.9613   | 386.5843 | 412.7338 |
| 413.6459   | 415.9522 | 418.5941 |
| 424.1952   | 427.4807 | 440.3410 |
| 443.0072   | 444.8276 | 477.3846 |
| 483.3710   | 487.3656 | 497.1905 |
| 508.2958   | 517.7258 | 526.5070 |
| 536.6443   | 560.4497 | 584.7503 |
| 595.7193   | 605.5507 | 614.3185 |
| 623.1983   | 627.3679 | 629.3052 |
| 641.7089   | 649.9642 | 651.9979 |



|           |           |           |
|-----------|-----------|-----------|
| 653.9069  | 675.6368  | 707.6945  |
| 711.2370  | 716.9916  | 721.9820  |
| 725.0952  | 730.6300  | 736.5033  |
| 754.9696  | 759.5978  | 766.1892  |
| 771.4117  | 777.4434  | 790.1753  |
| 792.2781  | 802.4445  | 805.7019  |
| 817.2976  | 822.8104  | 839.4315  |
| 841.9450  | 855.2070  | 859.7158  |
| 871.8098  | 876.3225  | 878.3926  |
| 880.1094  | 882.3636  | 896.0886  |
| 909.3837  | 913.3359  | 927.0576  |
| 937.6331  | 944.3669  | 952.3285  |
| 962.2417  | 963.6272  | 965.9330  |
| 971.9316  | 974.7892  | 980.3406  |
| 981.3632  | 990.1331  | 1003.7160 |
| 1006.2431 | 1017.8444 | 1018.6695 |
| 1020.7222 | 1021.9909 | 1022.3262 |
| 1023.5073 | 1028.4347 | 1029.5102 |
| 1031.0428 | 1048.6458 | 1050.2978 |
| 1052.5659 | 1055.7314 | 1065.4153 |
| 1066.9024 | 1073.9017 | 1075.0395 |
| 1084.6344 | 1103.0706 | 1109.0716 |
| 1118.1550 | 1122.1848 | 1127.1762 |
| 1134.6135 | 1139.1608 | 1148.5779 |
| 1153.5217 | 1161.9796 | 1175.4412 |
| 1181.3054 | 1184.0139 | 1192.1167 |
| 1199.8369 | 1201.4565 | 1206.6478 |
| 1215.9556 | 1219.3211 | 1226.7780 |
| 1228.4157 | 1239.2375 | 1244.8117 |
| 1248.5510 | 1250.9742 | 1267.1590 |
| 1269.5885 | 1278.9589 | 1280.3626 |
| 1294.7604 | 1308.1689 | 1310.4726 |
| 1313.6578 | 1320.1133 | 1323.6480 |
| 1325.3447 | 1334.3827 | 1343.8634 |
| 1346.5737 | 1348.4273 | 1359.0511 |
| 1364.0692 | 1369.8813 | 1371.3292 |
| 1373.8096 | 1376.7239 | 1377.9930 |
| 1403.9190 | 1415.2978 | 1421.8545 |
| 1423.0933 | 1430.8790 | 1452.3740 |
| 1459.0096 | 1461.4731 | 1467.5760 |
| 1483.8028 | 1484.2211 | 1490.0295 |
| 1491.4995 | 1497.5409 | 1499.3389 |
| 1504.5266 | 1505.5008 | 1512.7620 |
| 1514.6045 | 1516.1643 | 1531.4283 |

|           |           |           |
|-----------|-----------|-----------|
| 1535.8801 | 1537.5181 | 1540.3817 |
| 1544.8787 | 1556.4777 | 1565.9838 |
| 1588.6160 | 1595.4593 | 1656.2828 |
| 1673.2755 | 1675.5085 | 1676.4310 |
| 1680.4834 | 1680.7881 | 1683.9680 |
| 1686.9630 | 1691.1751 | 1700.2021 |
| 1700.7202 | 1702.9068 | 1706.8909 |
| 2568.9406 | 3073.5182 | 3082.9792 |
| 3083.9056 | 3085.6343 | 3095.7711 |
| 3110.3824 | 3141.5610 | 3159.6619 |
| 3163.0878 | 3164.3365 | 3167.1336 |
| 3168.8487 | 3179.5701 | 3181.8732 |
| 3186.0619 | 3193.4542 | 3199.1499 |
| 3201.4183 | 3201.7689 | 3202.0562 |
| 3205.4630 | 3205.7921 | 3206.0301 |
| 3209.5393 | 3214.7399 | 3215.1705 |
| 3216.1689 | 3222.7440 | 3224.3954 |
| 3226.3284 | 3226.9492 | 3227.7196 |
| 3228.8848 | 3229.2438 | 3234.4051 |
| 3234.7715 | 3246.1872 | 3250.0295 |

## M8R

Zero-point correction=0.604384

Thermal correction to Energy=0.639839

Thermal correction to Enthalpy=0.640784

Thermal correction to Gibbs Free Energy=0.532263

Sum of electronic and zero-point Energies=-2294.229908

Sum of electronic and thermal Energies=-2294.194453

Sum of electronic and thermal Enthalpies=-2294.193509

Sum of electronic and thermal Free Energies=-2294.302030

### Cartesian coordinate

|   |             |             |             |
|---|-------------|-------------|-------------|
| N | -4.54490800 | -0.16183400 | -0.36382500 |
| C | -3.63191800 | -0.62611000 | -1.22982200 |
| C | -2.45936300 | 0.08580200  | -1.51673000 |
| C | -2.22284700 | 1.31029800  | -0.89623300 |
| C | -3.18568300 | 1.79013300  | -0.00924100 |
| C | -4.32011000 | 1.01700900  | 0.21648500  |
| C | -0.91226100 | 2.05073600  | -1.13436200 |
| C | 0.15600000  | 1.50780200  | -0.16854000 |
| C | 0.76070900  | 0.20804900  | -0.63200200 |
| O | 0.79886200  | -0.18221200 | -1.77306800 |
| C | -3.89855500 | -1.95779200 | -1.83736200 |

|   |             |             |             |
|---|-------------|-------------|-------------|
| C | -3.27730500 | -2.35894200 | -3.02531800 |
| C | -3.52166200 | -3.61965700 | -3.55944400 |
| C | -4.38928000 | -4.49713500 | -2.91428900 |
| C | -5.02233900 | -4.10114400 | -1.73818500 |
| C | -4.78320000 | -2.83947500 | -1.20564200 |
| H | -1.72571400 | -0.31761300 | -2.20716800 |
| H | -3.06562800 | 2.74669600  | 0.48811200  |
| H | -5.08730600 | 1.36316000  | 0.90540700  |
| H | -0.57555600 | 1.81298300  | -2.14940000 |
| H | -2.62226700 | -1.67748000 | -3.55899300 |
| H | -3.04073100 | -3.91292000 | -4.48696200 |
| H | -4.57817100 | -5.48072500 | -3.33188000 |
| H | -5.70723700 | -4.77632100 | -1.23553300 |
| H | -5.28383800 | -2.51715800 | -0.29894100 |
| C | -1.07360600 | 3.55675100  | -1.03740800 |
| C | -1.57794300 | 4.24426400  | -2.14468400 |
| C | -0.78628200 | 4.27314600  | 0.12569100  |
| C | -1.78340800 | 5.61804500  | -2.09440000 |
| H | -1.81343300 | 3.69304100  | -3.05149100 |
| C | -0.99248200 | 5.65105600  | 0.17903200  |
| H | -0.40512600 | 3.76393100  | 1.00697100  |
| C | -1.48971900 | 6.32617400  | -0.93030000 |
| H | -2.17145100 | 6.13714100  | -2.96460800 |
| H | -0.76413400 | 6.19422200  | 1.09016000  |
| H | -1.64879400 | 7.39845200  | -0.88982800 |
| H | -0.22829600 | 1.41037100  | 0.85183100  |
| C | 6.02971000  | -0.47069100 | -0.78018400 |
| C | 4.74391800  | 0.03578200  | -0.61099100 |
| C | 4.52859700  | 1.35799900  | -0.23781200 |
| C | 5.63256700  | 2.17918700  | -0.03137600 |
| C | 6.92557700  | 1.67716800  | -0.20028100 |
| C | 7.13326900  | 0.35287700  | -0.57636900 |
| C | 6.00102700  | -1.91694800 | -1.19938400 |
| C | 4.53562500  | -2.36683400 | -1.01180000 |
| C | 3.70747100  | -1.02708700 | -0.89694500 |
| H | 3.52447400  | 1.75179600  | -0.10394000 |
| H | 5.48929300  | 3.21374900  | 0.26061900  |
| H | 7.77715600  | 2.32834500  | -0.03384400 |
| H | 8.13949700  | -0.03341700 | -0.70417500 |
| H | 6.66299700  | -2.55661700 | -0.60847200 |
| H | 4.17406500  | -2.95580100 | -1.85430500 |
| H | 6.29894100  | -2.02484500 | -2.24699300 |
| H | 3.13150800  | -0.83659300 | -1.80439000 |
| N | 2.74263600  | -1.13855800 | 0.21112600  |

|    |             |             |             |
|----|-------------|-------------|-------------|
| O  | 4.36907600  | -3.22053600 | 0.10855300  |
| C  | 1.51727300  | -0.62368800 | 0.38848700  |
| C  | 3.07077400  | -1.78814900 | 1.36862800  |
| N  | 1.14229100  | -0.99223800 | 1.61283000  |
| N  | 2.09878800  | -1.72414500 | 2.23712200  |
| C  | 4.34429000  | -2.57172700 | 1.36411300  |
| H  | 5.21245800  | -1.91764800 | 1.51926500  |
| H  | 4.31846400  | -3.33434600 | 2.14204300  |
| C  | -0.15337900 | -0.82656800 | 2.20533500  |
| C  | -0.24444600 | -0.27808900 | 3.47939800  |
| C  | -1.27120700 | -1.23684900 | 1.48555600  |
| C  | -1.50344200 | -0.10694700 | 4.03919100  |
| C  | -2.52880700 | -1.06742500 | 2.05180900  |
| C  | -2.63193600 | -0.49324200 | 3.31614500  |
| H  | -1.61388900 | 0.32502800  | 5.02670900  |
| H  | -3.41898000 | -1.37850800 | 1.51722400  |
| H  | -1.16934200 | -1.70696400 | 0.51118000  |
| H  | 0.65217400  | 0.00981000  | 4.01699200  |
| Cl | -4.20203600 | -0.25866200 | 4.00846000  |
| H  | 1.00457400  | 2.20821300  | -0.11865800 |

Variable frequencies

|          |          |          |
|----------|----------|----------|
| 12.2343  | 17.8233  | 22.2748  |
| 23.9889  | 24.8793  | 34.9823  |
| 39.2505  | 44.6832  | 46.9395  |
| 52.4093  | 65.1706  | 76.2823  |
| 81.7010  | 84.5300  | 99.3541  |
| 114.5426 | 117.1110 | 136.2319 |
| 147.0282 | 170.7224 | 181.6234 |
| 205.5721 | 217.6216 | 225.9449 |
| 229.2490 | 239.9714 | 248.7588 |
| 263.0693 | 270.6291 | 286.9288 |
| 305.9770 | 313.5078 | 351.9965 |
| 360.7458 | 375.2469 | 383.4238 |
| 410.8368 | 414.9713 | 415.8284 |
| 417.7199 | 425.6319 | 429.6408 |
| 438.9411 | 444.5165 | 474.5785 |
| 480.8925 | 485.4819 | 493.8310 |
| 519.9059 | 524.1187 | 529.3278 |
| 546.1251 | 566.2469 | 591.3123 |
| 602.1730 | 608.3746 | 625.6918 |
| 626.7193 | 630.7510 | 644.3550 |
| 648.4784 | 649.9269 | 671.0190 |
| 706.7369 | 714.7624 | 720.1346 |

|           |           |           |
|-----------|-----------|-----------|
| 723.7987  | 724.4467  | 730.8006  |
| 742.9264  | 754.0044  | 759.2665  |
| 764.3474  | 767.8748  | 787.6811  |
| 797.0811  | 808.9669  | 811.6515  |
| 836.8656  | 851.0915  | 858.1229  |
| 863.1512  | 868.4402  | 874.3750  |
| 874.8323  | 875.2840  | 882.3949  |
| 886.3660  | 903.8082  | 909.6700  |
| 938.8411  | 948.5148  | 950.4395  |
| 960.2968  | 979.0165  | 983.6801  |
| 989.2807  | 1001.1338 | 1005.0248 |
| 1006.4501 | 1007.4705 | 1015.6675 |
| 1016.1944 | 1019.6674 | 1022.9120 |
| 1025.5296 | 1028.2607 | 1029.3171 |
| 1032.0572 | 1036.6251 | 1047.5209 |
| 1052.9773 | 1064.1122 | 1068.8644 |
| 1069.3655 | 1080.6252 | 1099.1234 |
| 1114.9956 | 1118.3780 | 1123.4197 |
| 1132.9207 | 1138.0822 | 1143.9495 |
| 1154.9369 | 1156.7850 | 1165.1594 |
| 1177.2745 | 1181.7914 | 1185.4851 |
| 1192.9567 | 1198.3819 | 1200.4457 |
| 1203.9833 | 1218.9885 | 1220.7468 |
| 1222.4813 | 1236.3238 | 1241.0980 |
| 1250.3387 | 1266.8757 | 1276.1083 |
| 1288.7081 | 1299.3567 | 1306.5555 |
| 1309.1276 | 1317.2324 | 1324.8205 |
| 1332.1054 | 1333.5611 | 1335.4118 |
| 1344.3268 | 1348.0792 | 1353.4806 |
| 1359.1678 | 1361.2972 | 1368.9330 |
| 1372.5824 | 1375.1506 | 1378.3610 |
| 1408.3923 | 1416.1290 | 1445.6468 |
| 1458.4693 | 1461.1630 | 1464.3867 |
| 1481.4647 | 1484.9647 | 1499.8937 |
| 1508.4071 | 1519.2155 | 1534.0277 |
| 1536.5707 | 1538.9949 | 1544.4476 |
| 1558.5716 | 1559.3722 | 1590.4307 |
| 1652.0850 | 1669.8130 | 1675.0800 |
| 1678.0271 | 1681.8662 | 1682.1453 |
| 1685.5695 | 1690.6201 | 1694.5990 |
| 1703.3398 | 1704.0617 | 1864.2429 |
| 3045.8233 | 3086.3284 | 3091.9435 |
| 3098.0443 | 3131.0052 | 3143.7610 |
| 3160.0832 | 3176.4601 | 3191.8706 |

|           |           |           |
|-----------|-----------|-----------|
| 3196.5083 | 3197.5111 | 3199.8353 |
| 3200.0194 | 3200.1136 | 3208.6246 |
| 3212.4662 | 3213.3935 | 3215.7787 |
| 3220.4872 | 3223.6913 | 3228.1556 |
| 3229.7845 | 3231.2794 | 3232.1009 |
| 3233.4805 | 3237.0204 | 3237.2918 |
| 3242.5417 | 3254.4409 | 3264.4697 |

MeOH + PivO<sup>-</sup>

Zero-point correction=0.188957

Thermal correction to Energy=0.201035

Thermal correction to Enthalpy=0.201980

Thermal correction to Gibbs Free Energy=0.150463

Sum of electronic and zero-point Energies=-461.858095

Sum of electronic and thermal Energies=-461.846016

Sum of electronic and thermal Enthalpies=-461.845072

Sum of electronic and thermal Free Energies=-461.896589

Cartesian coordinate

|   |             |             |             |
|---|-------------|-------------|-------------|
| C | 3.53102300  | 0.50145700  | -0.26410600 |
| H | 4.44847800  | 0.88146800  | 0.20756200  |
| H | 3.73529900  | 0.43284300  | -1.34845800 |
| H | 2.72931600  | 1.23611900  | -0.12006000 |
| O | 3.19599700  | -0.73662100 | 0.30113000  |
| H | 2.20855600  | -0.82727700 | 0.18333600  |
| C | -1.60754900 | -0.01425900 | -0.02204300 |
| C | -1.94360800 | -0.64898200 | -1.37491900 |
| H | -3.02104800 | -0.83991200 | -1.46397500 |
| H | -1.64694900 | 0.01030800  | -2.19853000 |
| H | -1.40212000 | -1.59138300 | -1.48332900 |
| C | -2.31438800 | 1.32959700  | 0.12232700  |
| H | -3.40346500 | 1.20544700  | 0.06016300  |
| H | -2.06599900 | 1.79403700  | 1.08005800  |
| H | -1.99303800 | 2.01877300  | -0.66313300 |
| C | -2.04180100 | -0.96397000 | 1.09913900  |
| H | -1.49345700 | -1.90520900 | 1.01778100  |
| H | -1.82737000 | -0.52818800 | 2.08140600  |
| H | -3.11903400 | -1.16904100 | 1.04625600  |
| C | -0.05879800 | 0.15662900  | 0.06409500  |
| O | 0.59090000  | -0.92223700 | -0.07774700 |
| O | 0.39579600  | 1.29875700  | 0.25836300  |

Variable frequencies

|           |           |           |
|-----------|-----------|-----------|
| 41.2981   | 68.6449   | 72.9266   |
| 78.1849   | 143.0322  | 176.6884  |
| 216.0993  | 223.7582  | 262.2403  |
| 281.5371  | 299.9481  | 305.6613  |
| 360.4145  | 385.4872  | 386.3466  |
| 541.9488  | 597.6110  | 800.4548  |
| 809.4450  | 886.3023  | 934.5644  |
| 949.2362  | 956.7863  | 967.5278  |
| 1049.1137 | 1055.7010 | 1148.3986 |
| 1175.7971 | 1208.3558 | 1258.0467 |
| 1262.8456 | 1285.0515 | 1385.2018 |
| 1396.4479 | 1409.3578 | 1458.3140 |
| 1483.7204 | 1488.5889 | 1497.0053 |
| 1500.0527 | 1506.4498 | 1511.9936 |
| 1518.3753 | 1534.7297 | 1549.4120 |
| 1573.7424 | 1748.7123 | 2961.4632 |
| 3035.1368 | 3035.5463 | 3039.0204 |
| 3046.2070 | 3106.9509 | 3107.8609 |
| 3113.2109 | 3127.9876 | 3150.5032 |
| 3151.7582 | 3153.5192 | 3161.6833 |

## M09R

Zero-point correction=0.796872

Thermal correction to Energy=0.844544

Thermal correction to Enthalpy=0.845488

Thermal correction to Gibbs Free Energy=0.711834

Sum of electronic and zero-point Energies=-2756.195904

Sum of electronic and thermal Energies=-2756.148233

Sum of electronic and thermal Enthalpies=-2756.147289

Sum of electronic and thermal Free Energies=-2756.280942

### Cartesian coordinate

|   |             |             |             |
|---|-------------|-------------|-------------|
| N | 5.93856700  | -1.15340000 | -0.54798200 |
| C | 5.78658900  | -0.17155400 | 0.35655100  |
| C | 4.54049900  | 0.39623400  | 0.62933000  |
| C | 3.40473000  | -0.03917100 | -0.05337900 |
| C | 3.57867400  | -1.04713100 | -1.00144400 |
| C | 4.85630300  | -1.56546900 | -1.20063000 |
| C | 2.06148900  | 0.60917300  | 0.24115600  |
| C | 0.88227500  | -0.27481400 | -0.18690500 |
| C | -0.41168800 | 0.08880800  | 0.59420800  |
| O | -0.49592000 | 1.27385100  | 1.05502400  |
| C | 7.01601300  | 0.26319400  | 1.07369500  |

|   |             |             |             |
|---|-------------|-------------|-------------|
| C | 7.12133200  | 1.53563700  | 1.64516000  |
| C | 8.27799800  | 1.91415100  | 2.31966700  |
| C | 9.34558000  | 1.02743000  | 2.43147200  |
| C | 9.25306500  | -0.23806700 | 1.85558400  |
| C | 8.09938600  | -0.61591400 | 1.17886300  |
| H | 4.43994400  | 1.16502700  | 1.38967600  |
| H | 2.74382200  | -1.44338100 | -1.57128800 |
| H | 5.01041900  | -2.35989000 | -1.92834400 |
| H | 1.99367000  | 0.76284900  | 1.32375300  |
| H | 6.30919500  | 2.24844500  | 1.54095400  |
| H | 8.34826100  | 2.90758400  | 2.75120100  |
| H | 10.24660900 | 1.32290900  | 2.95955900  |
| H | 10.08235900 | -0.93387000 | 1.93551400  |
| H | 8.01714500  | -1.59564600 | 0.72152800  |
| C | 2.00837300  | 1.98696900  | -0.41024200 |
| C | 1.74196100  | 3.12859200  | 0.34689300  |
| C | 2.22807700  | 2.12633600  | -1.78252400 |
| C | 1.69911400  | 4.38342400  | -0.25357100 |
| H | 1.52469200  | 3.01666300  | 1.40411400  |
| C | 2.18039100  | 3.37909600  | -2.38854000 |
| H | 2.45437800  | 1.24670100  | -2.38196100 |
| C | 1.92226500  | 4.51368800  | -1.62289400 |
| H | 1.48069500  | 5.26075000  | 0.34735000  |
| H | 2.35736800  | 3.47017300  | -3.45584600 |
| H | 1.89144500  | 5.49326400  | -2.09070400 |
| H | 0.71281800  | -0.14102700 | -1.26400600 |
| C | -4.09263900 | 3.65089100  | -0.53978300 |
| C | -2.93994400 | 2.87963600  | -0.40941000 |
| C | -1.73850100 | 3.26232200  | -1.00206600 |
| C | -1.72223500 | 4.43181600  | -1.75892300 |
| C | -2.87798900 | 5.20290400  | -1.90532900 |
| C | -4.06833400 | 4.82347300  | -1.29053200 |
| C | -5.24306600 | 3.06073000  | 0.23398900  |
| C | -4.75255100 | 1.67315000  | 0.70739400  |
| C | -3.20012800 | 1.65928100  | 0.44584500  |
| H | -0.83744000 | 2.67361800  | -0.84489500 |
| H | -0.79477500 | 4.74720900  | -2.22618200 |
| H | -2.84630100 | 6.11165200  | -2.49845900 |
| H | -4.96316100 | 5.43042200  | -1.39506200 |
| H | -6.15690200 | 2.95254000  | -0.35995400 |
| H | -4.93119500 | 1.49717600  | 1.76672100  |
| H | -5.49619500 | 3.68706600  | 1.09541400  |
| H | -2.62766100 | 1.66155600  | 1.37079700  |
| N | -2.81408400 | 0.42461200  | -0.26678600 |



|    |             |             |             |
|----|-------------|-------------|-------------|
| O  | -5.46088500 | 0.61791500  | 0.06258200  |
| C  | -1.67269900 | -0.27931600 | -0.26485400 |
| C  | -3.66078100 | -0.17333800 | -1.15836100 |
| N  | -1.87938500 | -1.27079200 | -1.13776500 |
| N  | -3.12094500 | -1.22222600 | -1.70515700 |
| C  | -5.04416400 | 0.37236300  | -1.26457900 |
| H  | -5.05994700 | 1.28564400  | -1.87593000 |
| H  | -5.71172700 | -0.36841600 | -1.70595100 |
| C  | -0.98780900 | -2.33692000 | -1.49024000 |
| C  | -0.47001700 | -2.36747800 | -2.78002300 |
| C  | -0.66012900 | -3.29829700 | -0.54276800 |
| C  | 0.42505700  | -3.37176400 | -3.12678500 |
| C  | 0.24303200  | -4.29860300 | -0.88671400 |
| C  | 0.77929000  | -4.31995500 | -2.17021700 |
| H  | 0.84996600  | -3.41879100 | -4.12252100 |
| H  | 0.52810500  | -5.05647300 | -0.16641500 |
| H  | -1.09368900 | -3.25242900 | 0.44912600  |
| H  | -0.75934100 | -1.60563100 | -3.49624100 |
| Cl | 1.92205400  | -5.56403600 | -2.59487000 |
| H  | 1.11763500  | -1.32931100 | -0.02318200 |
| C  | -0.11822400 | -0.62638500 | 2.95060300  |
| H  | -0.32910600 | 0.43322900  | 3.11031800  |
| H  | -0.65900100 | -1.22685000 | 3.68690200  |
| H  | 0.95770200  | -0.81140000 | 3.05683400  |
| O  | -0.56717400 | -1.02101400 | 1.66405900  |
| H  | -1.95835700 | -1.64736400 | 1.75828100  |
| C  | -5.14322000 | -2.22987800 | 2.26073000  |
| C  | -5.47565300 | -2.73836300 | 0.85129400  |
| H  | -6.39447200 | -3.33233200 | 0.88301500  |
| H  | -5.63762900 | -1.89528600 | 0.17361700  |
| H  | -4.66898300 | -3.35918900 | 0.45431800  |
| C  | -6.25103600 | -1.31211900 | 2.77142100  |
| H  | -7.18786100 | -1.87301900 | 2.84584100  |
| H  | -6.00335800 | -0.91144300 | 3.75748600  |
| H  | -6.40000000 | -0.47523100 | 2.08411400  |
| C  | -4.95298900 | -3.42415400 | 3.21015900  |
| H  | -4.16140500 | -4.08587700 | 2.85090600  |
| H  | -4.69409700 | -3.08701400 | 4.21878200  |
| H  | -5.88529000 | -3.99418100 | 3.27087700  |
| C  | -3.82638100 | -1.46347500 | 2.21749800  |
| O  | -2.82830300 | -2.17902000 | 1.70727600  |
| O  | -3.67274300 | -0.32822900 | 2.62753100  |

Variable frequencies

|           |           |           |
|-----------|-----------|-----------|
| 10.2159   | 18.9225   | 24.2200   |
| 26.4613   | 30.9796   | 33.6209   |
| 37.4666   | 42.7576   | 43.7548   |
| 50.0427   | 52.7567   | 59.7920   |
| 60.0261   | 66.7306   | 72.8616   |
| 80.2623   | 82.6780   | 85.5365   |
| 87.0979   | 94.2241   | 101.1795  |
| 101.6181  | 109.8316  | 125.0351  |
| 129.9490  | 139.2916  | 142.3896  |
| 153.9334  | 168.1249  | 190.3253  |
| 198.8189  | 202.9991  | 211.0643  |
| 224.9346  | 231.5050  | 238.0671  |
| 251.1303  | 256.5947  | 257.6718  |
| 260.8098  | 270.1337  | 282.4831  |
| 292.1154  | 300.9317  | 305.0366  |
| 309.1636  | 330.9683  | 333.7677  |
| 349.1422  | 356.0770  | 362.6058  |
| 366.4317  | 373.3049  | 380.7064  |
| 394.5702  | 402.7043  | 416.4721  |
| 417.8449  | 420.0360  | 424.9024  |
| 427.9543  | 447.7976  | 458.7310  |
| 466.7337  | 476.0828  | 487.6022  |
| 493.1712  | 510.1364  | 511.7052  |
| 529.4337  | 535.6698  | 541.2581  |
| 559.4310  | 570.2412  | 579.4525  |
| 600.0020  | 600.5392  | 604.7496  |
| 611.4855  | 630.1781  | 632.3630  |
| 640.4250  | 641.8839  | 652.3417  |
| 665.5279  | 693.6473  | 707.1489  |
| 716.2183  | 720.6154  | 721.7641  |
| 729.3274  | 734.4617  | 753.3151  |
| 763.4323  | 769.2628  | 774.0558  |
| 779.5793  | 783.2328  | 789.5657  |
| 793.8534  | 800.7081  | 809.0922  |
| 818.6431  | 830.7441  | 841.8546  |
| 847.1579  | 860.1939  | 865.9043  |
| 874.3618  | 877.2146  | 877.7616  |
| 884.2275  | 894.5229  | 898.0345  |
| 912.2503  | 923.7053  | 931.8815  |
| 948.2597  | 956.6090  | 957.3361  |
| 959.2142  | 965.0829  | 968.1298  |
| 975.8911  | 986.2167  | 990.0654  |
| 993.2354  | 996.5713  | 1001.1577 |
| 1005.3350 | 1012.7296 | 1014.6904 |

|           |           |           |
|-----------|-----------|-----------|
| 1017.1050 | 1017.8518 | 1020.7529 |
| 1023.6616 | 1024.1081 | 1027.6139 |
| 1035.5347 | 1052.1101 | 1055.4557 |
| 1059.8292 | 1063.5777 | 1065.2230 |
| 1068.6720 | 1071.8370 | 1084.6157 |
| 1100.1970 | 1109.6929 | 1114.7204 |
| 1120.8475 | 1123.5551 | 1125.0115 |
| 1131.1491 | 1136.1581 | 1144.7437 |
| 1154.0357 | 1164.5055 | 1176.3924 |
| 1177.4538 | 1184.9635 | 1188.2008 |
| 1197.7962 | 1198.1676 | 1203.4869 |
| 1203.8427 | 1207.2885 | 1210.0562 |
| 1218.9198 | 1224.5254 | 1225.9529 |
| 1228.1858 | 1242.0842 | 1243.7056 |
| 1247.3222 | 1256.1154 | 1261.5527 |
| 1276.3190 | 1276.7488 | 1276.8401 |
| 1298.8673 | 1308.9960 | 1312.4145 |
| 1318.8173 | 1327.9890 | 1329.8970 |
| 1332.7751 | 1339.7123 | 1342.8754 |
| 1351.0954 | 1358.2282 | 1359.5880 |
| 1360.8765 | 1364.7714 | 1370.0301 |
| 1372.6993 | 1375.1426 | 1381.9503 |
| 1396.8798 | 1399.9434 | 1406.2762 |
| 1426.3498 | 1429.6933 | 1439.0762 |
| 1461.5424 | 1461.9213 | 1473.1078 |
| 1474.4450 | 1477.2628 | 1485.6776 |
| 1486.2473 | 1496.5756 | 1497.5567 |
| 1499.4935 | 1502.6485 | 1504.7444 |
| 1507.0652 | 1509.7176 | 1511.5508 |
| 1514.2636 | 1517.3785 | 1527.6703 |
| 1530.8195 | 1533.8097 | 1535.9376 |
| 1540.9287 | 1543.1466 | 1550.7063 |
| 1564.4992 | 1578.7650 | 1651.7803 |
| 1677.5049 | 1680.3844 | 1680.6142 |
| 1682.9452 | 1689.9806 | 1692.6185 |
| 1697.1648 | 1699.5886 | 1700.1696 |
| 1701.9433 | 1825.1454 | 2793.4040 |
| 3049.9567 | 3059.6471 | 3061.5668 |
| 3062.5981 | 3066.7309 | 3070.2962 |
| 3082.1903 | 3098.7420 | 3124.3102 |
| 3129.0156 | 3141.0339 | 3141.1107 |
| 3148.7743 | 3150.8547 | 3158.6219 |
| 3162.2485 | 3164.1886 | 3167.3889 |
| 3178.4057 | 3183.4350 | 3187.4728 |

|           |           |           |
|-----------|-----------|-----------|
| 3189.3789 | 3195.2093 | 3196.0378 |
| 3196.3225 | 3200.7550 | 3200.8885 |
| 3207.0070 | 3209.9081 | 3212.9863 |
| 3214.0617 | 3215.6230 | 3217.1126 |
| 3220.9614 | 3223.1583 | 3227.7989 |
| 3228.5058 | 3229.1351 | 3232.4561 |
| 3241.1870 | 3243.8249 | 3263.2627 |

## TS9R

Zero-point correction=0.793536

Thermal correction to Energy=0.840668

Thermal correction to Enthalpy=0.841612

Thermal correction to Gibbs Free Energy=0.710202

Sum of electronic and zero-point Energies=-2756.193519

Sum of electronic and thermal Energies=-2756.146387

Sum of electronic and thermal Enthalpies=-2756.145443

Sum of electronic and thermal Free Energies=-2756.276853

### Cartesian coordinate

|   |             |             |             |
|---|-------------|-------------|-------------|
| N | 5.94355300  | -1.23866500 | -0.47202200 |
| C | 5.81128000  | -0.20291100 | 0.37379200  |
| C | 4.56955400  | 0.37339500  | 0.64699600  |
| C | 3.41916100  | -0.10888900 | 0.02257800  |
| C | 3.57149700  | -1.17238100 | -0.86546200 |
| C | 4.84714500  | -1.69711600 | -1.06584600 |
| C | 2.08304700  | 0.55544200  | 0.31556400  |
| C | 0.90321700  | -0.30359400 | -0.14829700 |
| C | -0.41353600 | 0.17836500  | 0.45972100  |
| O | -0.48994300 | 1.24953200  | 1.06541700  |
| C | 7.05838700  | 0.28561900  | 1.02190200  |
| C | 7.16874700  | 1.59222600  | 1.50869800  |
| C | 8.34306500  | 2.02259700  | 2.11828000  |
| C | 9.42348200  | 1.15409600  | 2.24827000  |
| C | 9.32541500  | -0.14591900 | 1.75635000  |
| C | 8.15403600  | -0.57580100 | 1.14433600  |
| H | 4.48550500  | 1.18739900  | 1.36086800  |
| H | 2.72707100  | -1.60983600 | -1.38901700 |
| H | 4.98572400  | -2.53583700 | -1.74550800 |
| H | 2.00111500  | 0.68544700  | 1.40082100  |
| H | 6.34599700  | 2.29018300  | 1.38827200  |
| H | 8.41647700  | 3.04164000  | 2.48443800  |
| H | 10.33907000 | 1.49044500  | 2.72437300  |
| H | 10.16463300 | -0.82788300 | 1.85033000  |

|   |             |             |             |
|---|-------------|-------------|-------------|
| H | 8.06739800  | -1.58274600 | 0.75160800  |
| C | 2.04348800  | 1.94107600  | -0.32112300 |
| C | 1.78912800  | 3.08004600  | 0.44371600  |
| C | 2.25128800  | 2.08497900  | -1.69532300 |
| C | 1.73923500  | 4.33748100  | -0.15235500 |
| H | 1.59438000  | 2.96965900  | 1.50592700  |
| C | 2.19770700  | 3.33951600  | -2.29601700 |
| H | 2.47472400  | 1.20714500  | -2.29866800 |
| C | 1.94499700  | 4.47124800  | -1.52355800 |
| H | 1.53049200  | 5.21296900  | 0.45440900  |
| H | 2.36537600  | 3.43497700  | -3.36429400 |
| H | 1.90899200  | 5.45227000  | -1.98767200 |
| H | 0.82260500  | -0.23617200 | -1.24123800 |
| C | -4.12038800 | 3.68562200  | -0.51450800 |
| C | -2.96386800 | 2.91821300  | -0.39415800 |
| C | -1.76073800 | 3.32874100  | -0.96528000 |
| C | -1.74133800 | 4.52406100  | -1.67942700 |
| C | -2.89966500 | 5.29379200  | -1.80985200 |
| C | -4.09413600 | 4.88361300  | -1.22412900 |
| C | -5.28048300 | 3.05983400  | 0.21526200  |
| C | -4.78199700 | 1.66978000  | 0.67459300  |
| C | -3.22736700 | 1.67288600  | 0.42355800  |
| H | -0.85300300 | 2.74320000  | -0.84165900 |
| H | -0.81130800 | 4.85910000  | -2.12737500 |
| H | -2.86691000 | 6.22319000  | -2.36973100 |
| H | -4.99239600 | 5.48676900  | -1.31974700 |
| H | -6.17330200 | 2.95022800  | -0.40960000 |
| H | -4.95401400 | 1.47790100  | 1.73217800  |
| H | -5.57036800 | 3.66423200  | 1.08049800  |
| H | -2.68612500 | 1.64930900  | 1.36626200  |
| N | -2.82053000 | 0.45924400  | -0.31045400 |
| O | -5.48117500 | 0.61669400  | 0.02170300  |
| C | -1.66642100 | -0.21849600 | -0.32554900 |
| C | -3.66372600 | -0.16612600 | -1.18421700 |
| N | -1.85147700 | -1.21550700 | -1.19549600 |
| N | -3.10209700 | -1.20250200 | -1.73483800 |
| C | -5.05272500 | 0.36276600  | -1.29760000 |
| H | -5.07141100 | 1.26992500  | -1.91896200 |
| H | -5.70971800 | -0.38818600 | -1.73732600 |
| C | -0.95596300 | -2.29364400 | -1.51270500 |
| C | -0.24728700 | -2.24846700 | -2.70794100 |
| C | -0.82452200 | -3.34417400 | -0.61302100 |
| C | 0.65588000  | -3.26421100 | -2.99628400 |
| C | 0.08369700  | -4.35824000 | -0.90084700 |

|    |             |             |             |
|----|-------------|-------------|-------------|
| C  | 0.81968200  | -4.30113400 | -2.07986400 |
| H  | 1.23095700  | -3.25335400 | -3.91468400 |
| H  | 0.22044800  | -5.18550000 | -0.21441900 |
| H  | -1.42326600 | -3.35782900 | 0.29113600  |
| H  | -0.39184000 | -1.42095000 | -3.39492700 |
| Cl | 1.97266900  | -5.55808900 | -2.42671200 |
| H  | 1.05621400  | -1.35429900 | 0.10506600  |
| C  | -0.52103900 | -0.76483500 | 3.02727700  |
| H  | -0.55841800 | 0.33315400  | 3.03258900  |
| H  | -1.33578100 | -1.13238000 | 3.65911700  |
| H  | 0.44080000  | -1.09454600 | 3.43459400  |
| O  | -0.67606900 | -1.24590800 | 1.71046600  |
| H  | -1.74585500 | -1.65581700 | 1.61060700  |
| C  | -5.15496400 | -2.21975200 | 2.15287100  |
| C  | -5.57943800 | -2.72454700 | 0.76890900  |
| H  | -6.48971300 | -3.32820600 | 0.85192400  |
| H  | -5.79215100 | -1.88004000 | 0.10637900  |
| H  | -4.79042000 | -3.33254100 | 0.32024100  |
| C  | -6.22016500 | -1.29344000 | 2.73290800  |
| H  | -7.15751300 | -1.84271700 | 2.87229600  |
| H  | -5.90045100 | -0.89287800 | 3.69795900  |
| H  | -6.40731100 | -0.45474100 | 2.05682900  |
| C  | -4.92960600 | -3.41965100 | 3.08632600  |
| H  | -4.16737000 | -4.08660000 | 2.67666500  |
| H  | -4.60297900 | -3.08756900 | 4.07733900  |
| H  | -5.86235200 | -3.98098500 | 3.20594000  |
| C  | -3.81187500 | -1.48558600 | 2.03520100  |
| O  | -2.87448300 | -2.17765600 | 1.46139000  |
| O  | -3.64543500 | -0.35227400 | 2.49070500  |

#### Variable frequencies

|           |          |          |
|-----------|----------|----------|
| -322.3484 | 11.6996  | 19.7171  |
| 23.9655   | 27.8598  | 32.8655  |
| 34.1349   | 41.3929  | 46.2208  |
| 47.0558   | 57.1375  | 58.7248  |
| 63.8599   | 64.2897  | 75.0495  |
| 77.5113   | 83.3725  | 85.8310  |
| 90.8210   | 93.2955  | 101.6519 |
| 106.9463  | 112.2244 | 122.6291 |
| 130.5492  | 132.6560 | 149.3883 |
| 154.9705  | 157.5939 | 182.3369 |
| 196.0591  | 198.2310 | 201.1780 |
| 222.6301  | 227.0308 | 236.8114 |
| 248.3926  | 249.6296 | 256.1294 |

|           |           |           |
|-----------|-----------|-----------|
| 260.3984  | 264.7598  | 267.6192  |
| 282.9326  | 287.6493  | 303.4485  |
| 305.4485  | 308.7445  | 331.7347  |
| 336.0107  | 345.3267  | 354.8743  |
| 357.9793  | 365.4568  | 371.8487  |
| 380.8869  | 405.7705  | 413.4025  |
| 418.8133  | 419.2820  | 424.3438  |
| 429.0254  | 444.2233  | 455.1956  |
| 462.7716  | 475.3519  | 479.8176  |
| 487.1107  | 491.2108  | 505.2058  |
| 510.5200  | 528.6692  | 536.6563  |
| 559.4121  | 571.3499  | 580.9613  |
| 586.5630  | 602.7385  | 606.9574  |
| 613.3864  | 629.6638  | 632.9371  |
| 638.2085  | 645.5528  | 651.5317  |
| 659.6008  | 681.4328  | 704.9586  |
| 716.1487  | 719.4254  | 722.5723  |
| 726.7869  | 732.1648  | 740.6847  |
| 748.4339  | 764.3685  | 766.0061  |
| 774.7937  | 788.5891  | 792.6593  |
| 801.4826  | 803.6612  | 809.0682  |
| 817.1491  | 824.2176  | 831.7296  |
| 849.6549  | 853.7990  | 867.7498  |
| 871.1523  | 876.5627  | 876.7607  |
| 878.5158  | 888.2372  | 896.4350  |
| 909.8832  | 913.8747  | 923.2333  |
| 933.5357  | 952.8148  | 953.8399  |
| 957.4372  | 959.3324  | 961.6702  |
| 963.5662  | 983.7839  | 985.0253  |
| 999.0813  | 1000.3322 | 1004.6620 |
| 1005.0444 | 1007.7641 | 1012.7788 |
| 1014.9187 | 1017.0004 | 1018.7773 |
| 1020.7938 | 1023.2319 | 1025.0563 |
| 1033.6098 | 1039.8029 | 1050.6212 |
| 1052.8269 | 1060.2289 | 1068.0264 |
| 1068.9743 | 1069.4119 | 1071.7164 |
| 1091.9553 | 1107.9482 | 1116.5837 |
| 1121.4256 | 1124.0432 | 1125.6359 |
| 1127.6621 | 1135.7840 | 1142.4500 |
| 1153.1073 | 1162.3146 | 1169.7192 |
| 1177.5904 | 1179.3086 | 1183.3783 |
| 1191.5435 | 1196.4748 | 1199.8040 |
| 1204.2238 | 1206.2091 | 1206.4843 |
| 1207.2535 | 1217.8784 | 1219.4755 |

|           |           |           |
|-----------|-----------|-----------|
| 1228.4991 | 1244.3624 | 1247.7312 |
| 1255.3110 | 1263.4446 | 1270.9871 |
| 1279.2030 | 1280.9751 | 1282.9732 |
| 1306.2789 | 1307.5709 | 1313.0095 |
| 1324.6712 | 1325.7803 | 1329.2417 |
| 1335.1267 | 1341.4329 | 1342.2599 |
| 1345.2288 | 1356.7926 | 1362.3671 |
| 1367.3512 | 1368.5664 | 1371.8955 |
| 1373.5345 | 1385.2293 | 1386.0951 |
| 1391.0671 | 1396.2603 | 1413.2891 |
| 1419.7494 | 1432.1743 | 1461.9678 |
| 1463.4912 | 1466.8227 | 1473.9339 |
| 1480.8940 | 1483.2915 | 1485.6421 |
| 1486.2901 | 1494.8057 | 1499.7654 |
| 1502.4682 | 1504.0105 | 1505.1950 |
| 1507.6800 | 1509.9446 | 1512.5793 |
| 1518.2961 | 1520.6728 | 1536.2952 |
| 1538.6651 | 1539.3131 | 1542.4928 |
| 1550.4566 | 1551.2795 | 1563.1442 |
| 1589.6694 | 1654.9081 | 1677.6954 |
| 1677.7418 | 1680.3380 | 1681.9701 |
| 1683.9745 | 1690.1573 | 1693.2652 |
| 1697.0768 | 1698.8530 | 1700.4770 |
| 1702.4341 | 1707.8867 | 1793.8159 |
| 3038.3396 | 3055.4328 | 3055.5049 |
| 3060.5028 | 3064.7917 | 3074.2651 |
| 3084.5267 | 3100.5477 | 3107.7549 |
| 3129.2096 | 3131.7400 | 3134.9861 |
| 3140.8148 | 3143.2180 | 3156.9873 |
| 3159.6374 | 3163.9701 | 3164.8108 |
| 3177.5597 | 3179.2335 | 3187.4025 |
| 3189.6013 | 3197.5043 | 3197.5232 |
| 3197.9868 | 3203.1727 | 3203.7047 |
| 3204.9998 | 3210.7488 | 3211.8097 |
| 3213.7808 | 3215.9020 | 3216.3623 |
| 3218.0401 | 3219.1308 | 3224.2886 |
| 3226.4262 | 3227.2708 | 3235.2864 |
| 3239.1686 | 3246.9761 | 3263.5385 |

## **M9R**

Zero-point correction=0.648622

Thermal correction to Energy=0.686082

Thermal correction to Enthalpy=0.687026



Thermal correction to Gibbs Free Energy=0.577283  
 Sum of electronic and zero-point Energies=-2409.433637  
 Sum of electronic and thermal Energies=-2409.396176  
 Sum of electronic and thermal Enthalpies=-2409.395232  
 Sum of electronic and thermal Free Energies=-2409.504975

Cartesian coordinate

|   |             |             |             |
|---|-------------|-------------|-------------|
| N | -3.80722000 | -3.42720900 | -1.13615300 |
| C | -3.88807400 | -2.25018900 | -0.49452200 |
| C | -2.76472900 | -1.45397200 | -0.27289900 |
| C | -1.51433500 | -1.85423800 | -0.73930700 |
| C | -1.43751500 | -3.08125600 | -1.39390100 |
| C | -2.60776500 | -3.82021000 | -1.55785900 |
| C | -0.32906600 | -0.93954700 | -0.49104800 |
| C | 0.79072100  | -1.03297700 | -1.54210200 |
| C | 1.22849800  | 0.38020200  | -1.99716100 |
| O | 0.33426400  | 1.11028200  | -2.56209700 |
| C | -5.24368800 | -1.80648700 | -0.06775900 |
| C | -5.41961500 | -0.81917300 | 0.90947300  |
| C | -6.69607000 | -0.39806700 | 1.26912000  |
| C | -7.81638100 | -0.95815600 | 0.66037700  |
| C | -7.65064700 | -1.94910000 | -0.30501200 |
| C | -6.37574500 | -2.37147500 | -0.66451200 |
| H | -2.85448600 | -0.49543800 | 0.22697900  |
| H | -0.49803500 | -3.45654000 | -1.78708000 |
| H | -2.57368300 | -4.78080800 | -2.06808700 |
| H | -0.72793200 | 0.07707200  | -0.56734600 |
| H | -4.55932500 | -0.38881800 | 1.41312400  |
| H | -6.81554300 | 0.36247900  | 2.03470500  |
| H | -8.81180400 | -0.62896200 | 0.94085500  |
| H | -8.51866100 | -2.39338200 | -0.78192200 |
| H | -6.23357800 | -3.14143900 | -1.41437700 |
| C | 0.14764400  | -1.11959900 | 0.94396300  |
| C | 0.13167800  | -0.04342000 | 1.83530300  |
| C | 0.56579800  | -2.36940200 | 1.41305700  |
| C | 0.53188100  | -0.20652900 | 3.16185100  |
| H | -0.21843700 | 0.92744000  | 1.48621500  |
| C | 0.95394400  | -2.53984500 | 2.73783100  |
| H | 0.57188100  | -3.21888500 | 0.73420900  |
| C | 0.94087900  | -1.45731000 | 3.61805800  |
| H | 0.51008200  | 0.64076200  | 3.84046100  |
| H | 1.26592300  | -3.51962500 | 3.08637900  |
| H | 1.24145100  | -1.59053000 | 4.65232900  |
| H | 1.64284500  | -1.62387700 | -1.18597200 |

|    |             |             |             |
|----|-------------|-------------|-------------|
| C  | -1.54406500 | 3.52285800  | 0.67783300  |
| C  | -1.09308100 | 2.85376900  | -0.46684600 |
| C  | -1.97106700 | 2.05030900  | -1.19585100 |
| C  | -3.27512600 | 1.88611500  | -0.72778500 |
| C  | -3.70378800 | 2.51194300  | 0.44342300  |
| C  | -2.83995000 | 3.34568800  | 1.14962600  |
| C  | -0.48859700 | 4.44744700  | 1.21533900  |
| C  | 0.40941200  | 4.63464900  | -0.02411600 |
| C  | 0.32281100  | 3.29476500  | -0.81722000 |
| H  | -1.61298100 | 1.55103100  | -2.08873300 |
| H  | -3.96554400 | 1.25623300  | -1.28166400 |
| H  | -4.72267400 | 2.36453400  | 0.78991300  |
| H  | -3.17710000 | 3.87007100  | 2.03897300  |
| H  | 0.04717600  | 3.97473500  | 2.04683600  |
| H  | -0.04003700 | 5.39635000  | -0.66567800 |
| H  | -0.88288600 | 5.39886600  | 1.57919900  |
| H  | 0.47343200  | 3.39450100  | -1.89022500 |
| N  | 1.44299100  | 2.41773700  | -0.33471600 |
| O  | 1.71956100  | 5.08531000  | 0.23562300  |
| C  | 1.82615900  | 1.18220200  | -0.73553700 |
| C  | 2.36861200  | 2.83728500  | 0.59350200  |
| N  | 2.90875600  | 0.90421400  | -0.00498900 |
| N  | 3.25982200  | 1.92218600  | 0.82796700  |
| C  | 2.42192300  | 4.24072500  | 1.11378000  |
| H  | 2.04260400  | 4.30009200  | 2.14062500  |
| H  | 3.46378100  | 4.56466600  | 1.11844100  |
| C  | 3.67416300  | -0.31100100 | 0.06721400  |
| C  | 3.57488400  | -1.05074300 | 1.23824000  |
| C  | 4.52505400  | -0.68459500 | -0.96626600 |
| C  | 4.32167800  | -2.21461300 | 1.37366600  |
| C  | 5.27220100  | -1.84869300 | -0.83195600 |
| C  | 5.15954700  | -2.60098000 | 0.33357400  |
| H  | 4.24958200  | -2.81547800 | 2.27289900  |
| H  | 5.93872500  | -2.17026200 | -1.62346600 |
| H  | 4.58010700  | -0.08774600 | -1.86605400 |
| H  | 2.90889700  | -0.72033100 | 2.02885900  |
| Cl | 6.09656400  | -4.06321700 | 0.49499900  |
| H  | 0.42041700  | -1.49089100 | -2.46387000 |
| O  | 2.42777000  | 0.13201100  | -2.78270000 |
| C  | 2.81470900  | 1.25181000  | -3.54741800 |
| H  | 3.16769200  | 2.08080000  | -2.90867600 |
| H  | 3.64168400  | 0.93260600  | -4.18603500 |
| H  | 1.98428500  | 1.61699300  | -4.15508400 |

Variable frequencies

|           |           |           |
|-----------|-----------|-----------|
| 13.6914   | 19.1538   | 23.7358   |
| 28.6156   | 34.3646   | 38.8497   |
| 52.9591   | 57.7841   | 61.4918   |
| 78.5814   | 83.6841   | 90.0037   |
| 91.2306   | 99.2881   | 114.1658  |
| 117.2952  | 121.1694  | 129.6734  |
| 155.7828  | 158.4708  | 177.6947  |
| 180.5420  | 196.2515  | 203.7985  |
| 216.5389  | 223.6121  | 239.8056  |
| 241.4007  | 252.4344  | 259.4330  |
| 261.7540  | 286.0344  | 294.1639  |
| 300.7909  | 311.1371  | 326.5549  |
| 349.1038  | 364.6743  | 370.8042  |
| 377.6764  | 391.8144  | 412.4482  |
| 415.3293  | 418.2328  | 421.0360  |
| 431.3995  | 453.0828  | 457.6861  |
| 469.4440  | 473.9846  | 495.5225  |
| 497.7148  | 507.3831  | 512.3682  |
| 542.1517  | 553.5003  | 570.6681  |
| 579.3301  | 592.9649  | 600.0493  |
| 608.5520  | 622.7275  | 629.8630  |
| 631.6285  | 638.6404  | 650.7344  |
| 652.1700  | 661.8352  | 668.1026  |
| 689.1112  | 715.0388  | 719.2900  |
| 721.7230  | 725.4564  | 731.7338  |
| 754.8428  | 763.4373  | 768.0790  |
| 778.2951  | 795.5496  | 797.0008  |
| 805.4991  | 811.1765  | 816.6817  |
| 836.6336  | 848.9325  | 850.3823  |
| 865.5037  | 877.4002  | 881.4038  |
| 884.5410  | 886.1539  | 887.6642  |
| 902.2157  | 922.4975  | 929.7562  |
| 935.7605  | 944.6434  | 962.0444  |
| 975.0956  | 985.6883  | 996.5709  |
| 997.2704  | 997.7905  | 1007.8669 |
| 1012.4199 | 1014.6529 | 1015.2031 |
| 1017.2479 | 1018.8544 | 1019.5553 |
| 1025.1378 | 1031.9737 | 1040.8091 |
| 1045.3627 | 1052.7141 | 1061.4500 |
| 1067.2943 | 1070.1966 | 1071.7639 |
| 1074.4816 | 1090.8469 | 1096.3640 |
| 1110.9471 | 1118.6823 | 1121.1082 |
| 1127.0566 | 1131.2543 | 1133.9301 |

|           |           |           |
|-----------|-----------|-----------|
| 1136.4989 | 1146.5911 | 1155.9783 |
| 1160.5644 | 1173.2318 | 1178.3120 |
| 1179.9297 | 1186.0478 | 1187.2242 |
| 1196.7888 | 1204.1208 | 1205.4304 |
| 1208.3377 | 1212.4356 | 1217.6963 |
| 1224.7931 | 1233.5987 | 1239.6782 |
| 1243.8196 | 1261.2241 | 1276.4064 |
| 1278.6920 | 1295.4780 | 1310.2429 |
| 1313.0087 | 1315.6555 | 1321.8209 |
| 1323.6303 | 1326.1053 | 1339.9790 |
| 1340.5295 | 1352.1195 | 1352.3971 |
| 1354.7399 | 1359.9558 | 1367.8684 |
| 1373.0348 | 1375.3992 | 1382.0399 |
| 1389.4056 | 1419.1481 | 1424.9245 |
| 1443.8350 | 1457.9063 | 1463.5930 |
| 1472.6686 | 1480.2257 | 1492.6309 |
| 1498.6577 | 1501.9339 | 1502.8890 |
| 1505.0900 | 1514.0393 | 1520.6732 |
| 1526.4640 | 1527.6915 | 1532.1882 |
| 1538.6435 | 1548.1829 | 1563.3800 |
| 1568.0869 | 1656.0594 | 1672.1312 |
| 1672.7771 | 1675.3837 | 1677.1300 |
| 1683.4124 | 1690.8752 | 1692.4451 |
| 1698.4189 | 1698.8068 | 1701.9794 |
| 2992.1213 | 3078.2153 | 3078.3862 |
| 3093.4794 | 3111.2735 | 3116.1110 |
| 3139.0827 | 3141.5275 | 3154.7087 |
| 3169.9373 | 3172.3571 | 3182.3470 |
| 3183.1367 | 3192.5380 | 3195.1151 |
| 3201.0900 | 3201.5416 | 3202.7267 |
| 3206.0068 | 3206.4112 | 3212.5357 |
| 3215.7381 | 3216.6445 | 3221.9036 |
| 3230.2038 | 3231.8045 | 3233.4116 |
| 3235.3216 | 3236.0779 | 3242.9713 |
| 3254.9428 | 3255.7051 | 3280.9690 |

## TS10R

Zero-point correction=0.647233

Thermal correction to Energy=0.684586

Thermal correction to Enthalpy=0.685530

Thermal correction to Gibbs Free Energy=0.575293

Sum of electronic and zero-point Energies=-2409.432773

Sum of electronic and thermal Energies=-2409.395420

Sum of electronic and thermal Enthalpies=-2409.394476

Sum of electronic and thermal Free Energies=-2409.504714

Cartesian coordinate

|   |             |             |             |
|---|-------------|-------------|-------------|
| N | -4.10171900 | -3.15067800 | -1.31990400 |
| C | -4.08918300 | -2.00270500 | -0.62205100 |
| C | -2.91012200 | -1.29386500 | -0.39747400 |
| C | -1.69856200 | -1.75536400 | -0.90918800 |
| C | -1.71910000 | -2.95359800 | -1.61794800 |
| C | -2.94169000 | -3.60215100 | -1.78893700 |
| C | -0.44995700 | -0.94005600 | -0.62009200 |
| C | 0.69152300  | -1.10752000 | -1.63490400 |
| C | 1.21299700  | 0.25227800  | -2.11233800 |
| O | 0.43634100  | 1.07885000  | -2.64298500 |
| C | -5.40059700 | -1.50222600 | -0.12459000 |
| C | -5.48356900 | -0.52988800 | 0.87963500  |
| C | -6.72039300 | -0.06253600 | 1.31255700  |
| C | -7.89365900 | -0.56037900 | 0.75130700  |
| C | -7.82074200 | -1.53510500 | -0.24140200 |
| C | -6.58548000 | -2.00390100 | -0.67407000 |
| H | -2.91800400 | -0.36275500 | 0.15850400  |
| H | -0.81633000 | -3.38181700 | -2.04115900 |
| H | -2.98371700 | -4.53833400 | -2.34200900 |
| H | -0.76072700 | 0.10665100  | -0.68240800 |
| H | -4.58143700 | -0.14710600 | 1.34746200  |
| H | -6.76785400 | 0.68541700  | 2.09819700  |
| H | -8.85794400 | -0.19547100 | 1.09029400  |
| H | -8.73065400 | -1.93142800 | -0.68101800 |
| H | -6.51470600 | -2.76425100 | -1.44376500 |
| C | -0.04527200 | -1.18962700 | 0.82643900  |
| C | -0.07115400 | -0.14875200 | 1.75795100  |
| C | 0.29271200  | -2.47382800 | 1.26386600  |
| C | 0.24205400  | -0.38294800 | 3.09709800  |
| H | -0.35198100 | 0.85078500  | 1.42811300  |
| C | 0.59842700  | -2.71316200 | 2.59964600  |
| H | 0.30163100  | -3.29491700 | 0.55048200  |
| C | 0.57646200  | -1.66678100 | 3.52206200  |
| H | 0.21348500  | 0.43637900  | 3.80897400  |
| H | 0.85021200  | -3.71857400 | 2.92338100  |
| H | 0.81050300  | -1.85382200 | 4.56523000  |
| H | 1.51344500  | -1.71386800 | -1.24060800 |
| C | -1.06265700 | 3.66751000  | 0.81997000  |
| C | -0.75023500 | 2.99225300  | -0.36687600 |
| C | -1.72599700 | 2.26229200  | -1.04149000 |

|    |             |             |             |
|----|-------------|-------------|-------------|
| C  | -2.99940500 | 2.16895600  | -0.47591400 |
| C  | -3.29091300 | 2.79023400  | 0.73857200  |
| C  | -2.32513800 | 3.55633600  | 1.39035600  |
| C  | 0.09295100  | 4.52181600  | 1.26673400  |
| C  | 0.87102800  | 4.68050000  | -0.05857200 |
| C  | 0.66461100  | 3.33134800  | -0.80197300 |
| H  | -1.47534900 | 1.76936500  | -1.97432200 |
| H  | -3.77447300 | 1.60629200  | -0.98863200 |
| H  | -4.28716000 | 2.69980100  | 1.16178800  |
| H  | -2.56278200 | 4.08055600  | 2.31118300  |
| H  | 0.68702800  | 4.00077600  | 2.02758700  |
| H  | 0.37973000  | 5.44931200  | -0.65984800 |
| H  | -0.20915300 | 5.48461600  | 1.68498400  |
| H  | 0.77684100  | 3.38797000  | -1.88479000 |
| N  | 1.72064800  | 2.39988900  | -0.31149100 |
| O  | 2.21488400  | 5.08805200  | 0.05067700  |
| C  | 1.89355800  | 1.08022300  | -0.58598100 |
| C  | 2.78195800  | 2.81433200  | 0.46358300  |
| N  | 3.02003500  | 0.77625200  | 0.06563100  |
| N  | 3.58968700  | 1.83233500  | 0.72344100  |
| C  | 2.98979300  | 4.24157800  | 0.86591800  |
| H  | 2.76281900  | 4.38001100  | 1.93056000  |
| H  | 4.03706600  | 4.50424300  | 0.70688700  |
| C  | 3.63649800  | -0.51362600 | 0.17812100  |
| C  | 3.35095000  | -1.27527700 | 1.30270900  |
| C  | 4.51873000  | -0.95891100 | -0.79987200 |
| C  | 3.94532700  | -2.52347500 | 1.45165900  |
| C  | 5.11604300  | -2.20533800 | -0.65390800 |
| C  | 4.81981000  | -2.97313800 | 0.46941600  |
| H  | 3.72378200  | -3.13972200 | 2.31541200  |
| H  | 5.80339400  | -2.58174000 | -1.40215000 |
| H  | 4.71766200  | -0.34384200 | -1.66853100 |
| H  | 2.65641000  | -0.89776400 | 2.04638300  |
| Cl | 5.56526400  | -4.53959100 | 0.64581100  |
| H  | 0.33125600  | -1.58692900 | -2.55124700 |
| O  | 2.45586700  | 0.00479700  | -2.73866600 |
| C  | 2.96140700  | 1.11528700  | -3.45107400 |
| H  | 3.24812100  | 1.92909300  | -2.76589700 |
| H  | 3.85109100  | 0.77045700  | -3.98124400 |
| H  | 2.22290400  | 1.50076900  | -4.15618500 |

Variable frequencies

|           |         |         |
|-----------|---------|---------|
| -191.3862 | 11.4119 | 17.0524 |
| 24.5757   | 28.9725 | 31.5284 |

|           |           |           |
|-----------|-----------|-----------|
| 34.0747   | 49.5630   | 55.5564   |
| 58.8507   | 81.2026   | 83.1801   |
| 87.9317   | 91.9021   | 103.8170  |
| 108.7863  | 117.4206  | 119.7115  |
| 127.2021  | 152.3586  | 158.6899  |
| 165.8961  | 171.4648  | 191.2733  |
| 196.3373  | 216.7583  | 223.7920  |
| 231.2208  | 240.5551  | 254.1589  |
| 257.0125  | 260.1472  | 288.7475  |
| 296.2191  | 299.6095  | 315.3333  |
| 333.8183  | 349.4347  | 360.0919  |
| 362.0722  | 386.6104  | 407.1470  |
| 415.0649  | 417.8080  | 422.5481  |
| 430.7842  | 440.3897  | 453.2896  |
| 458.2858  | 463.0301  | 490.8535  |
| 499.3496  | 502.6388  | 503.1689  |
| 542.0085  | 544.9648  | 565.2113  |
| 572.8522  | 588.4648  | 597.7311  |
| 607.7710  | 609.1718  | 627.8875  |
| 628.6384  | 634.3649  | 643.2067  |
| 651.4166  | 652.7407  | 673.9541  |
| 695.4120  | 708.4857  | 717.1416  |
| 721.7667  | 727.6286  | 732.7735  |
| 736.6729  | 762.8082  | 764.5726  |
| 773.0270  | 794.6988  | 798.6630  |
| 806.9456  | 808.4476  | 818.3288  |
| 824.6877  | 847.8301  | 857.2218  |
| 867.4253  | 871.8653  | 878.5400  |
| 879.0902  | 884.3199  | 888.1059  |
| 900.0779  | 919.7586  | 926.5651  |
| 936.5032  | 947.8039  | 960.7599  |
| 981.2817  | 983.8374  | 994.0008  |
| 996.2350  | 1005.4018 | 1007.2347 |
| 1007.3143 | 1010.8112 | 1012.9112 |
| 1016.7015 | 1017.1805 | 1020.4094 |
| 1025.2231 | 1029.8461 | 1037.0931 |
| 1044.4514 | 1049.6347 | 1058.1557 |
| 1061.7481 | 1069.4717 | 1071.2332 |
| 1075.7937 | 1089.4281 | 1095.8817 |
| 1110.9282 | 1120.1530 | 1124.2612 |
| 1124.9650 | 1129.3702 | 1135.1816 |
| 1138.4472 | 1147.2565 | 1155.1813 |
| 1160.3831 | 1177.7163 | 1178.6307 |
| 1179.8367 | 1188.4220 | 1189.3029 |

|           |           |           |
|-----------|-----------|-----------|
| 1200.1731 | 1202.1243 | 1203.8257 |
| 1207.9120 | 1211.2731 | 1219.3238 |
| 1223.0357 | 1232.0820 | 1240.8299 |
| 1240.8667 | 1261.7694 | 1274.9165 |
| 1281.4639 | 1296.1056 | 1307.6740 |
| 1318.6545 | 1318.8634 | 1320.5995 |
| 1322.9584 | 1323.2193 | 1336.2003 |
| 1341.1945 | 1342.5965 | 1352.7231 |
| 1353.6842 | 1359.1696 | 1365.7037 |
| 1369.3178 | 1375.2252 | 1380.5435 |
| 1392.8753 | 1398.3342 | 1424.7722 |
| 1457.2429 | 1461.8321 | 1462.6674 |
| 1469.0585 | 1473.0961 | 1491.0888 |
| 1495.9633 | 1501.1728 | 1503.1677 |
| 1504.5547 | 1520.1707 | 1520.8488 |
| 1524.9526 | 1532.0380 | 1538.3507 |
| 1547.3665 | 1560.8694 | 1569.5198 |
| 1608.1882 | 1656.4364 | 1674.2044 |
| 1674.8711 | 1676.5322 | 1679.5196 |
| 1683.5201 | 1690.6227 | 1693.7330 |
| 1696.1578 | 1698.6146 | 1699.2751 |
| 3018.1662 | 3067.1722 | 3077.7325 |
| 3080.3259 | 3129.4114 | 3131.4402 |
| 3136.0003 | 3137.1742 | 3147.6832 |
| 3160.5626 | 3178.2156 | 3178.9358 |
| 3180.9038 | 3183.5090 | 3184.6409 |
| 3197.8496 | 3202.0649 | 3203.5573 |
| 3210.4135 | 3210.7499 | 3211.4490 |
| 3214.3012 | 3222.4169 | 3224.4215 |
| 3228.7912 | 3231.3868 | 3233.5812 |
| 3236.9975 | 3242.8278 | 3243.3113 |
| 3247.8674 | 3253.2926 | 3261.2771 |

## PR

Zero-point correction=0.354422

Thermal correction to Energy=0.374798

Thermal correction to Enthalpy=0.375742

Thermal correction to Gibbs Free Energy=0.302189

Sum of electronic and zero-point Energies=-1016.144558

Sum of electronic and thermal Energies=-1016.124181

Sum of electronic and thermal Enthalpies=-1016.123237

Sum of electronic and thermal Free Energies=-1016.196790



Cartesian coordinate

|   |             |             |             |
|---|-------------|-------------|-------------|
| C | -6.11810800 | 0.85745900  | -1.05082700 |
| C | -6.03500100 | 0.20368200  | 0.17703000  |
| H | -6.90994200 | 0.13463400  | 0.81573600  |
| C | -4.83350700 | -0.35999700 | 0.58983900  |
| H | -4.75722200 | -0.87620900 | 1.54044200  |
| C | -3.69315900 | -0.27048000 | -0.21576000 |
| C | -3.78794600 | 0.37860500  | -1.45121900 |
| H | -2.92553900 | 0.42546300  | -2.10884900 |
| C | -4.99187600 | 0.93918100  | -1.86523500 |
| H | -5.05207900 | 1.43306600  | -2.82982600 |
| C | -1.18008400 | -0.41484100 | -0.21597600 |
| H | -1.12615000 | 0.42222600  | -0.90561700 |
| C | -2.41403300 | -0.86883800 | 0.25211800  |
| N | -2.51009000 | -1.85547100 | 1.15981000  |
| C | -1.38367600 | -2.41205500 | 1.59119500  |
| H | -1.49454700 | -3.20559000 | 2.32728000  |
| C | -0.11135900 | -2.04193100 | 1.15640700  |
| H | 0.75969600  | -2.55201000 | 1.55302100  |
| C | 0.00098600  | -1.01064000 | 0.22726300  |
| C | 1.32547900  | -0.48321400 | -0.29298800 |
| H | 1.24832800  | -0.41520100 | -1.38396700 |
| C | 1.60022300  | 0.92044500  | 0.23205400  |
| C | 1.45371100  | 1.21257700  | 1.59115700  |
| H | 1.09720400  | 0.44129500  | 2.27018500  |
| C | 1.74351700  | 2.48312300  | 2.07662200  |
| H | 1.62159000  | 2.69701700  | 3.13379000  |
| C | 2.18104900  | 3.48074200  | 1.20711800  |
| C | 2.32797900  | 3.19822300  | -0.14747600 |
| H | 2.66743900  | 3.96996500  | -0.83116800 |
| C | 2.03947500  | 1.92428800  | -0.63230600 |
| H | 2.16942600  | 1.69631400  | -1.68612000 |
| C | 2.50798600  | -1.40930300 | 0.00968400  |
| H | 2.77565500  | -1.39728000 | 1.06988100  |
| H | 2.26293500  | -2.44560200 | -0.25538700 |
| C | 3.72257100  | -1.02701700 | -0.80649600 |
| O | 3.69058100  | -0.48189600 | -1.88448400 |
| O | 4.85733500  | -1.40151400 | -0.20391900 |
| C | 6.05352000  | -1.11578200 | -0.93439100 |
| H | 6.87266500  | -1.48031300 | -0.31796700 |
| H | 6.14545700  | -0.04094500 | -1.10123400 |
| H | 6.04017700  | -1.62560800 | -1.89967500 |
| H | 2.40284300  | 4.47360100  | 1.58528000  |
| H | -7.05712600 | 1.29539800  | -1.37412100 |

Variable frequencies

|           |           |           |
|-----------|-----------|-----------|
| 15.5957   | 29.9060   | 36.1370   |
| 40.6252   | 47.2455   | 71.8086   |
| 90.6335   | 96.3491   | 127.1269  |
| 134.5903  | 168.2822  | 193.0600  |
| 209.4267  | 214.5331  | 234.6035  |
| 257.0898  | 293.7935  | 306.5888  |
| 344.7018  | 366.0513  | 409.9909  |
| 417.6476  | 417.8264  | 463.0899  |
| 485.2923  | 506.4923  | 550.7223  |
| 581.0713  | 606.4825  | 628.3496  |
| 630.2592  | 636.2747  | 651.5229  |
| 678.4304  | 715.0980  | 723.0516  |
| 732.0292  | 764.0801  | 776.9639  |
| 792.2496  | 799.8097  | 809.3233  |
| 871.8563  | 878.0260  | 879.8672  |
| 910.0981  | 928.1724  | 948.6147  |
| 957.3871  | 958.9376  | 994.8188  |
| 1002.7974 | 1003.6876 | 1008.8230 |
| 1017.3154 | 1019.5972 | 1022.9152 |
| 1024.1346 | 1024.6972 | 1059.0747 |
| 1071.7538 | 1072.6770 | 1096.6661 |
| 1112.0007 | 1121.3618 | 1123.3002 |
| 1159.2450 | 1179.4079 | 1181.5215 |
| 1191.0119 | 1198.0278 | 1209.4653 |
| 1210.0073 | 1220.1604 | 1226.5718 |
| 1230.9549 | 1256.9303 | 1298.1732 |
| 1310.2827 | 1323.7094 | 1332.7164 |
| 1342.3443 | 1357.5417 | 1362.6343 |
| 1366.9971 | 1375.4850 | 1415.9199 |
| 1460.2377 | 1476.7226 | 1493.3807 |
| 1501.1887 | 1503.6023 | 1507.5245 |
| 1513.4646 | 1538.9309 | 1552.3307 |
| 1562.1539 | 1655.2758 | 1677.1377 |
| 1680.8404 | 1693.6812 | 1699.6581 |
| 1701.7457 | 1865.1177 | 3083.1688 |
| 3091.8931 | 3101.3743 | 3150.9699 |
| 3177.7882 | 3191.1583 | 3192.8467 |
| 3201.0237 | 3201.5457 | 3206.2386 |
| 3207.5688 | 3209.3604 | 3212.4992 |
| 3216.8881 | 3221.2255 | 3223.9775 |
| 3225.3514 | 3227.5743 | 3235.7992 |

## <sup>2</sup>M10

Zero-point correction=0.170944

Thermal correction to Energy=0.179871

Thermal correction to Enthalpy=0.180815

Thermal correction to Gibbs Free Energy=0.135747

Sum of electronic and zero-point Energies=-478.711731

Sum of electronic and thermal Energies=-478.702804

Sum of electronic and thermal Enthalpies=-478.701860

Sum of electronic and thermal Free Energies=-478.746928

### Cartesian coordinate

|   |             |             |             |
|---|-------------|-------------|-------------|
| N | 1.33084700  | -1.18499900 | -0.03289600 |
| C | 2.64042500  | -1.24614000 | -0.04141200 |
| H | 3.08446600  | -2.23735100 | -0.07382700 |
| C | 0.73963700  | 0.04030800  | 0.00311000  |
| C | 1.50335100  | 1.23755800  | 0.04638700  |
| H | 1.02384300  | 2.20676100  | 0.09351900  |
| C | 3.47504900  | -0.09922000 | -0.00952000 |
| H | 4.55247400  | -0.21856500 | -0.01909400 |
| C | 2.88747000  | 1.15722600  | 0.03881900  |
| H | 3.49236100  | 2.05568500  | 0.07021200  |
| C | -0.70052100 | 0.04365500  | -0.00204100 |
| C | -1.39278500 | -1.21080800 | 0.03163400  |
| C | -1.46305200 | 1.25295600  | -0.04160400 |
| C | -2.76517500 | -1.24630200 | 0.03839900  |
| H | -0.80175200 | -2.11727200 | 0.05583100  |
| C | -2.83364600 | 1.20371700  | -0.03845300 |
| H | -0.97028000 | 2.21584200  | -0.08646000 |
| C | -3.49331700 | -0.04332600 | 0.00479800  |
| H | -3.28929600 | -2.19406500 | 0.07008000  |
| H | -3.41446600 | 2.11775800  | -0.07057700 |
| H | -4.57789700 | -0.07154100 | 0.00987500  |

### Variable frequencies

|           |           |           |
|-----------|-----------|-----------|
| 74.8748   | 84.7847   | 186.1204  |
| 202.9146  | 345.9436  | 370.1257  |
| 394.4149  | 402.3005  | 435.8228  |
| 495.5770  | 578.0326  | 611.3906  |
| 632.8098  | 642.4905  | 714.1991  |
| 765.9140  | 785.2886  | 831.3314  |
| 847.4378  | 907.1306  | 989.4771  |
| 992.7321  | 1004.2330 | 1014.8112 |
| 1018.3008 | 1033.3775 | 1038.9545 |

|           |           |           |
|-----------|-----------|-----------|
| 1047.5826 | 1051.1891 | 1071.8815 |
| 1133.8607 | 1143.9972 | 1185.1404 |
| 1191.1727 | 1232.9714 | 1302.4797 |
| 1345.1629 | 1363.3582 | 1410.1628 |
| 1412.8309 | 1466.3690 | 1475.3082 |
| 1504.0606 | 1530.4116 | 1574.4993 |
| 1589.7997 | 1633.2043 | 1701.8784 |
| 3222.5062 | 3232.8279 | 3243.2822 |
| 3245.6144 | 3250.0861 | 3257.2992 |
| 3264.1540 | 3271.0297 | 3280.8523 |

## <sup>2</sup>M14R

Zero-point correction=0.605709

Thermal correction to Energy=0.640822

Thermal correction to Enthalpy=0.641766

Thermal correction to Gibbs Free Energy=0.537001

Sum of electronic and zero-point Energies=-2293.926787

Sum of electronic and thermal Energies=-2293.891674

Sum of electronic and thermal Enthalpies=-2293.890730

Sum of electronic and thermal Free Energies=-2293.995495

### Cartesian coordinate

|   |             |             |             |
|---|-------------|-------------|-------------|
| N | 4.53412400  | -1.34411600 | -0.01700700 |
| C | 4.52964700  | 0.00823300  | 0.11161800  |
| C | 3.35154900  | 0.72989100  | 0.42235700  |
| C | 2.15124300  | 0.04798900  | 0.60609800  |
| C | 2.18377600  | -1.33681300 | 0.47318600  |
| C | 3.40167200  | -1.98350800 | 0.16102900  |
| C | 0.86176800  | 0.78219000  | 0.97420300  |
| C | -0.33472000 | 0.04602600  | 0.42690100  |
| C | -1.46034400 | -0.20010800 | 1.10234500  |
| O | -1.79640200 | 0.15176100  | 2.36631100  |
| C | 5.79966500  | 0.66426900  | -0.09453000 |
| C | 5.94877800  | 2.08534000  | -0.00630900 |
| C | 7.17283900  | 2.66310000  | -0.21519600 |
| C | 8.29311400  | 1.85309400  | -0.51674900 |
| C | 8.17089500  | 0.45240700  | -0.60780800 |
| C | 6.95004100  | -0.13742000 | -0.40166700 |
| H | 3.36180200  | 1.80890100  | 0.51514800  |
| H | 1.28528400  | -1.93277000 | 0.60934000  |
| H | 3.42644400  | -3.06585700 | 0.05656400  |
| H | 0.82182500  | 0.76445300  | 2.07319700  |
| H | 5.10022000  | 2.71712600  | 0.22303500  |

|   |             |             |             |
|---|-------------|-------------|-------------|
| H | 7.29105500  | 3.73825400  | -0.15037700 |
| H | 9.25919700  | 2.31982100  | -0.67829200 |
| H | 9.04044200  | -0.15056300 | -0.84074400 |
| H | 6.82092300  | -1.21048900 | -0.46498800 |
| C | 0.88079400  | 2.24116200  | 0.53834400  |
| C | 0.93305000  | 3.25584200  | 1.49327000  |
| C | 0.89825600  | 2.57569400  | -0.81985500 |
| C | 1.01467800  | 4.59220300  | 1.10055600  |
| H | 0.92871300  | 3.00401700  | 2.55116600  |
| C | 0.98118600  | 3.90712900  | -1.21205700 |
| H | 0.85529500  | 1.79409100  | -1.57467300 |
| C | 1.04606600  | 4.91817300  | -0.25239500 |
| H | 1.06053000  | 5.37328500  | 1.85205000  |
| H | 0.99496100  | 4.15780200  | -2.26751700 |
| H | 1.11444700  | 5.95602200  | -0.56049500 |
| H | -0.28910400 | -0.29302200 | -0.60451200 |
| C | -4.65533000 | 2.20489600  | -0.95997100 |
| C | -3.90649200 | 1.86847400  | 0.17229400  |
| C | -2.81376200 | 2.63513200  | 0.56399000  |
| C | -2.45030600 | 3.72853500  | -0.21732600 |
| C | -3.18034800 | 4.05122500  | -1.36238600 |
| C | -4.29355900 | 3.29998500  | -1.73590900 |
| C | -5.82836800 | 1.27491900  | -1.13639300 |
| C | -5.95034700 | 0.64300500  | 0.26733500  |
| C | -4.50987700 | 0.66124500  | 0.84660900  |
| H | -2.26540300 | 2.40551800  | 1.47086600  |
| H | -1.60265200 | 4.33811900  | 0.07709200  |
| H | -2.89105200 | 4.91184000  | -1.95663400 |
| H | -4.87661600 | 3.57479000  | -2.60900700 |
| H | -5.61388700 | 0.52607800  | -1.90805700 |
| H | -6.54813500 | 1.30022700  | 0.90168000  |
| H | -6.74788300 | 1.78566500  | -1.42858800 |
| H | -4.47759900 | 0.66910800  | 1.93704400  |
| N | -3.85330400 | -0.61188600 | 0.40993700  |
| O | -6.56783000 | -0.62030000 | 0.35413400  |
| C | -2.55933900 | -0.95992500 | 0.48268800  |
| C | -4.50147600 | -1.64996200 | -0.20834700 |
| N | -2.46699900 | -2.16371800 | -0.08051300 |
| N | -3.66890300 | -2.60457800 | -0.52415100 |
| C | -5.98297300 | -1.62215400 | -0.43932000 |
| H | -6.18798400 | -1.48657700 | -1.50814200 |
| H | -6.41044400 | -2.57727900 | -0.12918300 |
| C | -1.30772600 | -3.01271400 | -0.15854000 |
| C | -0.71598700 | -3.23370500 | -1.39595900 |

|    |             |             |             |
|----|-------------|-------------|-------------|
| C  | -0.83543300 | -3.60686600 | 1.00673700  |
| C  | 0.39719000  | -4.06399400 | -1.46883700 |
| C  | 0.27620300  | -4.43898600 | 0.93221800  |
| C  | 0.88289300  | -4.65637600 | -0.30441500 |
| H  | 0.87935000  | -4.25878200 | -2.41970100 |
| H  | 0.66287100  | -4.92478700 | 1.82058300  |
| H  | -1.33414700 | -3.43462800 | 1.95516600  |
| H  | -1.12304800 | -2.77121200 | -2.28903800 |
| Cl | 2.27459300  | -5.68754900 | -0.39406400 |
| H  | -1.13754400 | 0.74181500  | 2.75782800  |

Variable frequencies

|          |          |          |
|----------|----------|----------|
| 19.6561  | 27.7637  | 30.8873  |
| 38.5445  | 45.5829  | 46.7722  |
| 57.7123  | 58.5090  | 61.7646  |
| 69.3343  | 79.3464  | 85.4993  |
| 88.8048  | 94.1211  | 106.5580 |
| 114.9779 | 140.4401 | 148.9749 |
| 166.9152 | 175.8893 | 195.5887 |
| 212.4375 | 213.9220 | 227.7606 |
| 241.0363 | 244.8318 | 260.2781 |
| 264.4624 | 291.3309 | 306.2344 |
| 316.2101 | 330.1586 | 347.4104 |
| 370.4286 | 370.6884 | 381.5947 |
| 386.8018 | 399.9844 | 409.6224 |
| 420.6166 | 423.0178 | 430.2670 |
| 447.5884 | 451.8021 | 464.7383 |
| 471.9108 | 481.6987 | 485.8091 |
| 496.8291 | 515.7716 | 521.1078 |
| 539.5530 | 552.5464 | 572.3760 |
| 575.7908 | 590.0350 | 602.5280 |
| 608.9532 | 626.7803 | 629.9996 |
| 633.6768 | 637.5646 | 640.5982 |
| 650.0816 | 663.9185 | 679.0532 |
| 710.5622 | 726.5777 | 727.4926 |
| 729.9275 | 733.6923 | 746.6668 |
| 761.4901 | 779.0699 | 785.6134 |
| 791.7013 | 801.3225 | 813.5187 |
| 813.8510 | 832.5316 | 845.5918 |
| 852.2091 | 859.1774 | 859.7829 |
| 869.5882 | 875.7836 | 884.7750 |
| 891.1161 | 903.1472 | 907.5381 |
| 916.4081 | 923.2440 | 938.8705 |
| 967.9449 | 985.5844 | 988.8305 |

|           |           |           |
|-----------|-----------|-----------|
| 992.8995  | 994.2833  | 1003.9947 |
| 1006.0389 | 1009.7132 | 1012.9963 |
| 1019.0395 | 1023.3220 | 1024.7878 |
| 1030.7850 | 1032.6016 | 1037.1213 |
| 1037.7469 | 1038.3188 | 1047.3631 |
| 1053.2983 | 1054.1186 | 1070.7571 |
| 1071.2936 | 1074.0263 | 1093.2968 |
| 1109.5123 | 1120.5371 | 1126.9762 |
| 1132.1467 | 1135.6804 | 1137.8477 |
| 1138.8809 | 1157.3168 | 1171.9027 |
| 1181.5503 | 1182.7292 | 1185.1030 |
| 1189.6845 | 1199.1022 | 1209.1940 |
| 1209.9772 | 1213.9398 | 1216.1316 |
| 1225.3930 | 1229.6008 | 1239.9542 |
| 1248.4380 | 1270.6335 | 1274.2003 |
| 1283.2099 | 1293.3052 | 1306.0181 |
| 1306.3015 | 1317.8658 | 1327.2046 |
| 1330.9125 | 1332.9706 | 1342.2008 |
| 1347.3178 | 1353.8158 | 1358.4175 |
| 1361.8113 | 1364.5760 | 1370.7600 |
| 1377.6529 | 1387.4200 | 1401.1200 |
| 1413.5503 | 1424.1083 | 1430.3421 |
| 1436.2491 | 1455.5952 | 1461.0211 |
| 1461.7919 | 1496.7401 | 1498.1234 |
| 1506.3928 | 1509.3230 | 1524.1612 |
| 1526.4175 | 1530.7926 | 1544.1281 |
| 1549.4467 | 1551.5164 | 1568.9648 |
| 1610.1932 | 1623.7843 | 1627.1438 |
| 1664.3287 | 1675.3831 | 1677.1375 |
| 1681.9344 | 1683.5240 | 1694.6683 |
| 1704.4352 | 1705.0461 | 1787.5327 |
| 3056.5453 | 3082.8436 | 3095.0438 |
| 3148.6903 | 3160.2023 | 3165.6544 |
| 3176.2316 | 3194.8505 | 3208.2665 |
| 3211.0935 | 3216.8024 | 3220.7181 |
| 3226.1151 | 3227.0617 | 3228.2630 |
| 3228.3711 | 3231.2949 | 3233.4095 |
| 3241.3673 | 3241.4822 | 3243.8049 |
| 3246.8278 | 3250.1573 | 3252.2073 |
| 3253.1590 | 3258.6180 | 3265.4003 |
| 3275.3845 | 3276.4071 | 3871.1749 |

Nts-

Zero-point correction=0.172058  
 Thermal correction to Energy=0.183676  
 Thermal correction to Enthalpy=0.184620  
 Thermal correction to Gibbs Free Energy=0.133965  
 Sum of electronic and zero-point Energies=-913.853911  
 Sum of electronic and thermal Energies=-913.842293  
 Sum of electronic and thermal Enthalpies=-913.841349  
 Sum of electronic and thermal Free Energies=-913.892004

Cartesian coordinate

|   |             |             |             |
|---|-------------|-------------|-------------|
| N | -2.30282500 | 0.26211600  | 1.11146000  |
| C | -2.16943000 | 1.70696300  | 1.17318900  |
| H | -2.68617000 | 2.06230600  | 2.07150000  |
| H | -1.12036800 | 2.05179000  | 1.25360000  |
| H | -2.60796200 | 2.22820300  | 0.30830800  |
| S | -1.76595500 | -0.36442000 | -0.21435700 |
| O | -2.01337500 | -1.81842100 | -0.22127000 |
| O | -2.13155200 | 0.36118400  | -1.45679000 |
| C | 0.03750300  | -0.22150000 | -0.18510400 |
| C | 0.79696300  | -1.19087000 | 0.47016700  |
| C | 0.66567200  | 0.89628000  | -0.72345100 |
| C | 2.17392500  | -1.04384900 | 0.57066400  |
| H | 0.29070900  | -2.05998100 | 0.87882600  |
| C | 2.04872400  | 1.04129200  | -0.61046600 |
| H | 0.06389100  | 1.63062900  | -1.25034700 |
| C | 2.82106900  | 0.07621100  | 0.03399200  |
| H | 2.76419800  | -1.80915900 | 1.07078800  |
| H | 2.53627500  | 1.91483900  | -1.03766500 |
| C | 4.31860500  | 0.21659400  | 0.14591000  |
| H | 4.83205900  | -0.59289000 | -0.38324800 |
| H | 4.66050700  | 1.16402500  | -0.27785200 |
| H | 4.64315200  | 0.17731700  | 1.19064700  |

Variable frequencies

|           |           |           |
|-----------|-----------|-----------|
| 54.4336   | 74.6777   | 99.7352   |
| 118.6767  | 168.7929  | 180.2149  |
| 233.5513  | 279.2920  | 292.6031  |
| 324.3473  | 368.6949  | 400.9067  |
| 419.2232  | 478.7044  | 534.8870  |
| 561.8443  | 588.2019  | 647.9904  |
| 658.7563  | 727.3073  | 821.0220  |
| 837.9103  | 872.1329  | 882.0606  |
| 982.3584  | 995.5481  | 1007.3899 |
| 1040.0839 | 1066.4952 | 1106.0523 |



|           |           |           |
|-----------|-----------|-----------|
| 1127.1152 | 1138.4385 | 1151.9876 |
| 1158.6786 | 1199.1726 | 1224.7269 |
| 1249.2268 | 1269.5838 | 1319.5041 |
| 1351.9571 | 1422.3725 | 1447.7311 |
| 1461.4042 | 1498.5839 | 1508.3450 |
| 1510.6429 | 1524.1340 | 1553.5424 |
| 1667.6638 | 1697.6148 | 2953.2803 |
| 3032.1147 | 3065.8749 | 3093.5159 |
| 3131.8136 | 3153.9314 | 3177.3213 |
| 3178.2946 | 3215.6584 | 3216.6092 |

### **<sup>os</sup>TS11RR**

Zero-point correction=0.855960

Thermal correction to Energy=0.908027

Thermal correction to Enthalpy=0.908971

Thermal correction to Gibbs Free Energy=0.765226

Sum of electronic and zero-point Energies=-3630.755273

Sum of electronic and thermal Energies=-3630.703206

Sum of electronic and thermal Enthalpies=-3630.702262

Sum of electronic and thermal Free Energies=-3630.846006

### Cartesian coordinate

|   |             |             |             |
|---|-------------|-------------|-------------|
| C | -1.39642300 | -0.96146900 | 0.48945600  |
| C | -2.63239900 | -0.31439100 | 0.31912200  |
| C | -3.70094400 | -0.98728200 | -0.28596400 |
| O | -3.80019700 | -2.20028800 | -0.62996700 |
| H | -1.35539300 | -1.97041000 | 0.08343400  |
| C | -0.42679000 | -0.65715300 | 1.53441200  |
| C | 0.70263400  | -1.48197100 | 1.65920900  |
| C | -0.52665500 | 0.44960600  | 2.39307100  |
| C | 1.69420100  | -1.22230500 | 2.59440300  |
| H | 0.79709700  | -2.32399100 | 0.98109500  |
| C | 0.46825900  | 0.71411000  | 3.32830100  |
| H | -1.38904000 | 1.10601700  | 2.32646400  |
| C | 1.58207900  | -0.11749500 | 3.43863900  |
| H | 2.55609300  | -1.88190400 | 2.66404300  |
| H | 0.37401700  | 1.57901200  | 3.97863000  |
| H | 2.35276200  | 0.09232300  | 4.17359400  |
| H | -2.77652900 | 0.71641400  | 0.63498600  |
| C | -6.66576000 | -1.69832500 | 3.06820100  |
| C | -5.77819200 | -2.04380700 | 2.04561900  |
| C | -4.47350600 | -2.44209800 | 2.32648900  |
| C | -4.06326600 | -2.46133600 | 3.65836300  |

|    |             |             |             |
|----|-------------|-------------|-------------|
| C  | -4.94349300 | -2.10774100 | 4.68183000  |
| C  | -6.25447000 | -1.73100700 | 4.39565700  |
| C  | -8.01814900 | -1.32945600 | 2.51578000  |
| C  | -7.96629900 | -1.92544700 | 1.09242700  |
| C  | -6.46464300 | -1.94608900 | 0.69958800  |
| H  | -3.80615500 | -2.72660200 | 1.51896200  |
| H  | -3.04631100 | -2.75376900 | 3.89866400  |
| H  | -4.60577100 | -2.13356400 | 5.71323300  |
| H  | -6.94268400 | -1.47256000 | 5.19502900  |
| H  | -8.13673400 | -0.23959100 | 2.49503800  |
| H  | -8.29735000 | -2.96541800 | 1.13244200  |
| H  | -8.85319100 | -1.73396100 | 3.09253900  |
| H  | -6.18926700 | -2.74447800 | 0.00969900  |
| N  | -6.17235300 | -0.67375400 | 0.00055400  |
| O  | -8.80055500 | -1.31145700 | 0.12953300  |
| C  | -4.96193900 | -0.21610800 | -0.38997400 |
| C  | -7.09406200 | 0.27985500  | -0.33158000 |
| N  | -5.20621500 | 0.98306700  | -0.93825800 |
| N  | -6.53766200 | 1.30854700  | -0.90094700 |
| C  | -8.55335900 | 0.06037500  | -0.07306400 |
| H  | -8.88323700 | 0.67142800  | 0.77623300  |
| H  | -9.12395900 | 0.36561800  | -0.95156400 |
| C  | -4.30810800 | 1.78678700  | -1.70617100 |
| C  | -4.28069400 | 3.15803500  | -1.48535700 |
| C  | -3.53906900 | 1.19035700  | -2.70420500 |
| C  | -3.46285100 | 3.95850600  | -2.27719500 |
| C  | -2.72669700 | 1.99145500  | -3.49677000 |
| C  | -2.69723300 | 3.36650500  | -3.27507000 |
| H  | -3.42144300 | 5.03034000  | -2.12270700 |
| H  | -2.12641000 | 1.55195100  | -4.28581200 |
| H  | -3.56294900 | 0.11475300  | -2.85560900 |
| H  | -4.90042800 | 3.59122300  | -0.70819600 |
| Cl | -1.67312300 | 4.36780400  | -4.26457800 |
| C  | -0.17548300 | -0.15642000 | -1.30108000 |
| C  | 0.63459100  | -1.21399400 | -1.73448000 |
| C  | 0.09934100  | -2.13739800 | -2.65551900 |
| O  | -1.08495800 | -2.15292000 | -3.10811900 |
| H  | -1.13491900 | -0.08468900 | -1.80653300 |
| C  | 0.32120500  | 1.08000200  | -0.70360700 |
| C  | -0.53572900 | 2.19089500  | -0.62109700 |
| C  | 1.60386200  | 1.19994700  | -0.14328300 |
| C  | -0.12622800 | 3.37589700  | -0.02133500 |
| H  | -1.53841900 | 2.10816300  | -1.03198900 |
| C  | 2.00940200  | 2.38184200  | 0.46425000  |

|    |             |             |             |
|----|-------------|-------------|-------------|
| H  | 2.28108300  | 0.35172300  | -0.16286700 |
| C  | 1.15146700  | 3.47949600  | 0.52544400  |
| H  | -0.80827100 | 4.22107200  | 0.01692700  |
| H  | 3.00257900  | 2.44646000  | 0.89899500  |
| H  | 1.47485500  | 4.40264200  | 0.99614800  |
| H  | 1.67303400  | -1.30520700 | -1.42803100 |
| C  | 1.20633400  | -0.85290400 | -6.91183300 |
| C  | 0.41970600  | -1.10743600 | -5.78660900 |
| C  | 0.03367300  | -0.07132900 | -4.93798300 |
| C  | 0.47643200  | 1.21967000  | -5.21805800 |
| C  | 1.26483500  | 1.47523800  | -6.34126500 |
| C  | 1.62653900  | 0.44144500  | -7.20173700 |
| C  | 1.49727500  | -2.11558300 | -7.67818800 |
| C  | 0.47565400  | -3.11603300 | -7.09488500 |
| C  | 0.09662900  | -2.58653800 | -5.68092200 |
| H  | -0.60095400 | -0.28191000 | -4.08324300 |
| H  | 0.20806900  | 2.03317700  | -4.54978000 |
| H  | 1.59396300  | 2.48889400  | -6.54774000 |
| H  | 2.22817500  | 0.64193600  | -8.08351000 |
| H  | 2.52957000  | -2.43843700 | -7.50212800 |
| H  | -0.43448300 | -3.08592900 | -7.69719200 |
| H  | 1.37750600  | -2.00583900 | -8.75880700 |
| H  | -0.93402800 | -2.78501500 | -5.39039200 |
| N  | 0.95291100  | -3.27718100 | -4.68950200 |
| O  | 0.87564900  | -4.47256800 | -7.10703100 |
| C  | 1.05232200  | -3.01076900 | -3.35633600 |
| C  | 1.94405800  | -4.16202300 | -5.00510200 |
| N  | 2.11313000  | -3.74345200 | -2.94748700 |
| N  | 2.67464500  | -4.46100700 | -3.97522100 |
| C  | 2.05636500  | -4.73426800 | -6.38580900 |
| H  | 2.94918800  | -4.34421600 | -6.88972400 |
| H  | 2.15700600  | -5.81881900 | -6.31446100 |
| C  | 2.62559400  | -3.93906900 | -1.63388100 |
| C  | 4.00629500  | -3.92830000 | -1.45848400 |
| C  | 1.76356500  | -4.19679000 | -0.57162800 |
| C  | 4.53764800  | -4.16720300 | -0.19725600 |
| C  | 2.29520400  | -4.43344600 | 0.69069200  |
| C  | 3.67588700  | -4.41119100 | 0.86639400  |
| H  | 5.60945500  | -4.15840100 | -0.03811000 |
| H  | 1.64286500  | -4.63389400 | 1.53352300  |
| H  | 0.68978400  | -4.20916200 | -0.73021800 |
| H  | 4.65263700  | -3.73934400 | -2.30798700 |
| Cl | 4.33889200  | -4.69802300 | 2.45260400  |

Variable frequencies

|           |          |          |
|-----------|----------|----------|
| -665.1611 | 8.7109   | 10.2642  |
| 18.6032   | 19.5920  | 25.2346  |
| 28.3282   | 30.0406  | 36.5403  |
| 42.2797   | 46.2134  | 48.4570  |
| 52.9718   | 59.6245  | 60.8987  |
| 63.8677   | 68.4694  | 73.1045  |
| 75.0418   | 77.5024  | 85.8139  |
| 89.8942   | 96.3638  | 106.4688 |
| 120.8444  | 136.0145 | 143.4705 |
| 149.3092  | 168.4607 | 171.3779 |
| 174.7705  | 178.5129 | 179.4373 |
| 207.2903  | 212.1459 | 217.9880 |
| 225.6403  | 230.6858 | 234.1222 |
| 244.0237  | 250.2108 | 255.1901 |
| 256.3235  | 265.6427 | 275.7721 |
| 277.1497  | 287.2009 | 298.7372 |
| 306.6207  | 325.7574 | 335.3433 |
| 347.0292  | 355.1048 | 363.7512 |
| 365.4618  | 378.1174 | 384.2492 |
| 387.4872  | 408.6106 | 414.8263 |
| 415.2578  | 420.9425 | 423.2776 |
| 424.7478  | 434.3587 | 438.8531 |
| 456.3693  | 461.0794 | 465.3990 |
| 469.1063  | 475.0156 | 485.2242 |
| 496.0037  | 496.3005 | 512.2354 |
| 520.3583  | 525.0663 | 535.3379 |
| 537.3505  | 539.1400 | 556.5053 |
| 557.7361  | 579.7300 | 586.0919 |
| 593.9368  | 598.9119 | 607.4330 |
| 608.2312  | 623.4956 | 624.3560 |
| 631.3918  | 633.1901 | 641.8197 |
| 644.3210  | 650.3391 | 652.9370 |
| 661.9459  | 675.4826 | 692.4014 |
| 694.9007  | 700.2266 | 706.0996 |
| 724.3478  | 727.1899 | 727.6870 |
| 728.7759  | 730.5027 | 744.6322 |
| 751.9059  | 760.1911 | 763.0797 |
| 766.1597  | 768.2726 | 776.5409 |
| 778.7666  | 788.4322 | 789.9674 |
| 803.0281  | 817.5106 | 820.1092 |
| 841.2318  | 845.8069 | 847.6222 |
| 848.2376  | 849.9696 | 850.3546 |
| 853.6012  | 856.6930 | 859.7850 |

|           |           |           |
|-----------|-----------|-----------|
| 871.6729  | 880.9885  | 886.6154  |
| 893.6684  | 901.3629  | 905.8747  |
| 908.3751  | 919.1843  | 919.5635  |
| 922.3559  | 923.1915  | 934.4834  |
| 969.8085  | 975.5201  | 976.3497  |
| 985.2206  | 985.7761  | 990.4146  |
| 991.2003  | 995.6044  | 1003.4980 |
| 1004.9302 | 1006.7895 | 1009.3997 |
| 1009.9849 | 1012.9707 | 1017.8337 |
| 1024.9685 | 1025.5827 | 1030.6702 |
| 1032.3883 | 1040.3388 | 1043.3648 |
| 1051.7585 | 1054.2508 | 1063.8272 |
| 1067.7088 | 1068.8342 | 1071.9612 |
| 1074.5925 | 1081.0493 | 1096.1668 |
| 1097.0317 | 1103.2964 | 1113.0102 |
| 1124.0760 | 1126.8376 | 1127.8450 |
| 1130.3662 | 1133.2537 | 1134.5556 |
| 1136.7170 | 1143.0895 | 1145.8386 |
| 1147.4749 | 1165.4655 | 1167.6950 |
| 1177.7647 | 1179.4755 | 1181.0889 |
| 1182.6499 | 1189.7988 | 1196.4955 |
| 1198.7592 | 1199.7814 | 1200.2668 |
| 1200.9454 | 1202.5063 | 1204.9515 |
| 1207.4378 | 1224.9131 | 1235.1281 |
| 1240.4924 | 1241.0637 | 1245.2415 |
| 1250.9337 | 1258.0507 | 1260.3566 |
| 1263.6831 | 1278.0758 | 1278.5456 |
| 1300.2820 | 1302.0530 | 1318.0047 |
| 1319.0378 | 1324.2868 | 1326.7397 |
| 1331.1150 | 1331.8011 | 1340.2705 |
| 1342.2740 | 1342.3666 | 1344.6213 |
| 1347.2414 | 1349.1106 | 1352.0471 |
| 1354.9533 | 1364.9247 | 1367.5045 |
| 1373.6389 | 1374.1320 | 1376.0229 |
| 1377.5339 | 1383.7049 | 1384.1710 |
| 1412.0345 | 1418.8211 | 1424.8580 |
| 1446.9173 | 1461.5578 | 1464.2802 |
| 1467.2775 | 1476.1305 | 1490.7109 |
| 1490.8591 | 1495.3694 | 1500.1293 |
| 1504.3476 | 1512.6571 | 1516.5606 |
| 1519.0349 | 1519.2210 | 1519.7176 |
| 1533.1616 | 1535.9005 | 1537.1010 |
| 1540.0526 | 1551.1515 | 1551.7480 |
| 1565.0255 | 1569.6168 | 1602.5312 |

|           |           |           |
|-----------|-----------|-----------|
| 1632.3154 | 1663.3393 | 1663.9648 |
| 1670.8472 | 1675.5930 | 1679.8322 |
| 1680.3233 | 1681.2199 | 1682.1248 |
| 1684.1071 | 1688.4255 | 1689.7700 |
| 1690.8263 | 1699.5803 | 1701.7599 |
| 3073.2644 | 3077.2591 | 3088.1332 |
| 3091.4629 | 3134.0033 | 3136.5398 |
| 3148.9474 | 3149.4119 | 3167.6471 |
| 3167.8016 | 3170.5544 | 3177.9674 |
| 3184.3002 | 3186.7618 | 3188.8626 |
| 3190.4812 | 3193.3185 | 3195.2620 |
| 3195.7976 | 3197.6822 | 3200.2721 |
| 3204.7020 | 3206.9836 | 3210.2390 |
| 3212.0782 | 3212.5812 | 3213.3686 |
| 3217.6710 | 3218.7683 | 3219.2265 |
| 3219.9223 | 3220.9407 | 3226.0151 |
| 3227.2367 | 3228.2649 | 3231.4374 |
| 3231.5229 | 3236.3491 | 3239.1131 |
| 3241.4064 | 3243.4505 | 3251.8366 |

## M11RR

Zero-point correction=0.861949

Thermal correction to Energy=0.913692

Thermal correction to Enthalpy=0.914636

Thermal correction to Gibbs Free Energy=0.771478

Sum of electronic and zero-point Energies=-3630.800497

Sum of electronic and thermal Energies=-3630.748755

Sum of electronic and thermal Enthalpies=-3630.747811

Sum of electronic and thermal Free Energies=-3630.890969

### Cartesian coordinate

|   |             |             |             |
|---|-------------|-------------|-------------|
| C | 0.78695900  | 0.73521400  | 0.44175100  |
| C | 1.97415400  | -0.15438500 | 0.23146300  |
| C | 2.74065700  | -0.03088200 | -0.88552100 |
| O | 2.81073100  | 0.86010400  | -1.79426000 |
| H | 0.65171800  | 1.29788100  | -0.49101200 |
| C | 0.90081600  | 1.74577100  | 1.56573200  |
| C | 0.17752000  | 2.94301900  | 1.51452200  |
| C | 1.69925700  | 1.50383400  | 2.68647500  |
| C | 0.24226000  | 3.86720700  | 2.55388800  |
| H | -0.43544900 | 3.15311300  | 0.64085500  |
| C | 1.76475900  | 2.42296000  | 3.73097400  |
| H | 2.28485600  | 0.58956600  | 2.72642400  |

|    |             |             |             |
|----|-------------|-------------|-------------|
| C  | 1.03577200  | 3.60876200  | 3.66970100  |
| H  | -0.31931700 | 4.79485000  | 2.48549500  |
| H  | 2.39220100  | 2.21388300  | 4.59277400  |
| H  | 1.09215100  | 4.32873100  | 4.48039200  |
| H  | 2.10300900  | -1.02919900 | 0.86389000  |
| C  | 6.90138900  | 0.73191300  | 0.61801400  |
| C  | 5.73424000  | 1.01233000  | -0.09795400 |
| C  | 4.75823200  | 1.86791000  | 0.40691600  |
| C  | 4.96873200  | 2.43204500  | 1.66473200  |
| C  | 6.12880400  | 2.14901900  | 2.38739000  |
| C  | 7.10768200  | 1.30186700  | 1.86876800  |
| C  | 7.80024200  | -0.20095000 | -0.15460900 |
| C  | 7.25863400  | -0.05093100 | -1.59241400 |
| C  | 5.75730300  | 0.29531000  | -1.42830900 |
| H  | 3.86614300  | 2.08040700  | -0.17522600 |
| H  | 4.21662600  | 3.09278200  | 2.08412700  |
| H  | 6.27527800  | 2.60139000  | 3.36351900  |
| H  | 8.01523700  | 1.09615700  | 2.42861700  |
| H  | 7.68860700  | -1.22861700 | 0.21249000  |
| H  | 7.73462900  | 0.81399400  | -2.05963300 |
| H  | 8.86058400  | 0.05388000  | -0.09110400 |
| H  | 5.32669600  | 0.87172800  | -2.24805500 |
| N  | 5.01647900  | -0.98739500 | -1.39581300 |
| O  | 7.50580300  | -1.12667600 | -2.47712200 |
| C  | 3.71214100  | -1.15649300 | -1.11879200 |
| C  | 5.53344000  | -2.21465200 | -1.70294400 |
| N  | 3.48959700  | -2.46453900 | -1.27746600 |
| N  | 4.62280300  | -3.14304200 | -1.63184600 |
| C  | 6.97664000  | -2.36817300 | -2.07156900 |
| H  | 7.53334000  | -2.79703700 | -1.22817800 |
| H  | 7.06447300  | -3.05099400 | -2.91825900 |
| C  | 2.23938100  | -3.15607200 | -1.16361800 |
| C  | 2.21322800  | -4.38105100 | -0.50875200 |
| C  | 1.08480200  | -2.58546800 | -1.69385800 |
| C  | 0.99821500  | -5.04317200 | -0.36172700 |
| C  | -0.13544800 | -3.23035000 | -1.52315300 |
| C  | -0.16069700 | -4.45179500 | -0.85539800 |
| H  | 0.94742600  | -5.99675400 | 0.15078500  |
| H  | -1.04972800 | -2.74260200 | -1.85435700 |
| H  | 1.12549300  | -1.62719800 | -2.20165900 |
| H  | 3.13083000  | -4.80377600 | -0.11538500 |
| Cl | -1.69103900 | -5.24572400 | -0.59722800 |
| C  | -0.49037800 | -0.17503100 | 0.57659400  |
| C  | -1.75027200 | 0.54050100  | 0.20565300  |

|   |             |             |             |
|---|-------------|-------------|-------------|
| C | -2.45733500 | 0.12642200  | -0.88256900 |
| O | -2.29931400 | -0.84897100 | -1.69608900 |
| H | -0.36453500 | -0.94255500 | -0.19227500 |
| C | -0.56307700 | -0.89870700 | 1.90772000  |
| C | -0.07093600 | -2.20281600 | 2.02469900  |
| C | -1.12535700 | -0.30166500 | 3.04173900  |
| C | -0.14167800 | -2.89602600 | 3.23247100  |
| H | 0.36795300  | -2.67994700 | 1.15161000  |
| C | -1.20340100 | -0.99004700 | 4.24789900  |
| H | -1.50678000 | 0.71378300  | 2.97406800  |
| C | -0.71390600 | -2.29220600 | 4.34882200  |
| H | 0.24206500  | -3.91049100 | 3.29467000  |
| H | -1.64821600 | -0.50942500 | 5.11412900  |
| H | -0.77817000 | -2.82923800 | 5.29026300  |
| H | -2.08587800 | 1.40893000  | 0.76566400  |
| C | -6.11357500 | -1.71852800 | 0.94992400  |
| C | -4.94812700 | -1.68946300 | 0.17835500  |
| C | -3.73696100 | -2.16012100 | 0.68059400  |
| C | -3.70648900 | -2.63711800 | 1.98962500  |
| C | -4.86574600 | -2.65628100 | 2.76662500  |
| C | -6.08066700 | -2.20635400 | 2.25100500  |
| C | -7.29184500 | -1.18169500 | 0.17714400  |
| C | -6.78907500 | -1.26037500 | -1.28067600 |
| C | -5.24630300 | -1.12984600 | -1.19544900 |
| H | -2.84679200 | -2.15258900 | 0.05814400  |
| H | -2.76784500 | -2.99268200 | 2.40434400  |
| H | -4.82093100 | -3.03339700 | 3.78383500  |
| H | -6.98418200 | -2.23805500 | 2.85285100  |
| H | -7.50636200 | -0.14859400 | 0.47712800  |
| H | -7.00069000 | -2.25711800 | -1.67379600 |
| H | -8.21041700 | -1.75582600 | 0.31930100  |
| H | -4.70139000 | -1.62282400 | -2.00072300 |
| N | -4.92442200 | 0.31381000  | -1.30352700 |
| O | -7.38864700 | -0.36837300 | -2.20094800 |
| C | -3.72154800 | 0.88932100  | -1.12806600 |
| C | -5.81572500 | 1.31051700  | -1.58981800 |
| N | -3.92931200 | 2.19526800  | -1.31328600 |
| N | -5.23798700 | 2.47760300  | -1.59437200 |
| C | -7.25192200 | 0.99606400  | -1.87843200 |
| H | -7.87833300 | 1.28463700  | -1.02515500 |
| H | -7.57858000 | 1.56887100  | -2.74797400 |
| C | -2.95232600 | 3.24038400  | -1.28760700 |
| C | -3.24194900 | 4.40648200  | -0.59264900 |
| C | -1.74268400 | 3.06514500  | -1.95608300 |



|    |             |            |             |
|----|-------------|------------|-------------|
| C  | -2.29465100 | 5.42493500 | -0.55309700 |
| C  | -0.79360200 | 4.07731800 | -1.90786000 |
| C  | -1.07947700 | 5.24613400 | -1.20458000 |
| H  | -2.49418300 | 6.34445800 | -0.01550600 |
| H  | 0.16459900  | 3.95520400 | -2.39941700 |
| H  | -1.53963100 | 2.14321100 | -2.49036300 |
| H  | -4.19649500 | 4.51292700 | -0.08968300 |
| Cl | 0.11931600  | 6.50687300 | -1.12972600 |

Variable frequencies

|          |          |          |
|----------|----------|----------|
| 5.2257   | 11.7820  | 21.9965  |
| 24.5699  | 27.1790  | 28.6092  |
| 31.9562  | 36.0737  | 41.1681  |
| 45.7210  | 48.0534  | 51.0279  |
| 55.1179  | 61.8708  | 63.4584  |
| 69.2891  | 75.4086  | 79.0882  |
| 82.6126  | 85.9094  | 90.9635  |
| 97.0193  | 108.8378 | 126.1930 |
| 136.2501 | 143.9881 | 146.3343 |
| 154.1619 | 157.9787 | 176.2038 |
| 182.3354 | 185.8502 | 190.4790 |
| 206.4544 | 213.6215 | 218.1056 |
| 223.3540 | 233.9394 | 237.0564 |
| 250.3127 | 251.4298 | 253.4386 |
| 266.4844 | 269.7014 | 284.1942 |
| 287.3113 | 306.3280 | 315.1745 |
| 319.4476 | 344.7365 | 346.1464 |
| 364.8720 | 370.7536 | 373.4770 |
| 377.1584 | 383.2323 | 405.3491 |
| 412.6578 | 417.2799 | 420.4803 |
| 424.8255 | 428.3031 | 437.0007 |
| 446.1371 | 452.5086 | 459.9314 |
| 461.8675 | 465.0750 | 467.4974 |
| 472.8515 | 494.5094 | 496.3099 |
| 499.8654 | 524.8749 | 531.1945 |
| 535.5008 | 539.2658 | 548.0444 |
| 550.7947 | 576.1702 | 579.5848 |
| 581.8460 | 588.5159 | 594.9711 |
| 608.6330 | 610.2046 | 624.2241 |
| 628.4690 | 630.7302 | 633.1259 |
| 642.3767 | 645.4450 | 651.2774 |
| 652.6349 | 669.4474 | 686.2726 |
| 689.9625 | 706.2508 | 710.5936 |
| 716.2261 | 721.4724 | 727.9256 |

|           |           |           |
|-----------|-----------|-----------|
| 728.5438  | 732.0561  | 734.6599  |
| 739.3888  | 744.9026  | 759.3733  |
| 761.1294  | 763.4852  | 776.1599  |
| 779.7747  | 788.9267  | 791.3068  |
| 795.9309  | 799.2698  | 812.3811  |
| 814.9843  | 817.0915  | 833.4754  |
| 849.3232  | 851.0211  | 852.2584  |
| 853.5174  | 857.3769  | 868.6968  |
| 873.6599  | 875.2139  | 876.8391  |
| 887.9866  | 890.8500  | 894.3701  |
| 905.6119  | 909.1956  | 923.8210  |
| 924.8270  | 929.6807  | 937.6612  |
| 961.0769  | 978.7808  | 980.4057  |
| 990.6554  | 991.5721  | 992.3880  |
| 994.4615  | 995.6370  | 1004.0679 |
| 1008.8388 | 1010.2226 | 1011.7301 |
| 1012.4404 | 1013.0321 | 1018.5047 |
| 1020.4518 | 1026.7139 | 1027.4444 |
| 1031.1242 | 1035.5873 | 1047.0265 |
| 1053.3304 | 1053.6770 | 1062.7111 |
| 1067.2029 | 1069.6262 | 1072.7099 |
| 1074.5830 | 1077.6361 | 1081.3858 |
| 1095.6612 | 1098.4452 | 1105.8296 |
| 1110.4486 | 1126.0231 | 1130.7275 |
| 1131.4727 | 1132.7333 | 1135.0111 |
| 1137.3267 | 1139.8894 | 1141.1083 |
| 1154.5670 | 1155.4025 | 1165.6753 |
| 1166.6781 | 1174.2201 | 1176.7735 |
| 1178.8805 | 1182.6050 | 1185.7563 |
| 1188.9363 | 1197.8201 | 1199.6309 |
| 1201.4310 | 1202.7594 | 1203.2046 |
| 1206.1522 | 1209.3006 | 1212.1041 |
| 1217.3224 | 1229.7966 | 1239.2334 |
| 1240.5839 | 1252.3087 | 1255.1955 |
| 1260.6043 | 1261.3417 | 1263.4087 |
| 1275.1204 | 1277.1723 | 1278.1289 |
| 1301.2634 | 1301.4766 | 1315.5757 |
| 1323.4732 | 1324.3967 | 1327.5694 |
| 1327.7942 | 1334.7099 | 1340.7225 |
| 1341.5126 | 1343.3328 | 1347.9085 |
| 1353.7173 | 1354.2126 | 1358.4107 |
| 1362.2518 | 1363.6149 | 1364.7045 |
| 1367.8999 | 1376.4835 | 1376.6060 |
| 1383.8430 | 1384.4795 | 1391.2515 |

|           |           |           |
|-----------|-----------|-----------|
| 1417.8271 | 1418.5589 | 1459.1267 |
| 1461.9052 | 1467.2966 | 1468.4807 |
| 1478.0119 | 1484.8817 | 1492.1378 |
| 1494.4177 | 1506.9776 | 1508.3735 |
| 1509.0260 | 1509.2847 | 1515.8041 |
| 1518.8638 | 1520.4553 | 1525.7575 |
| 1537.6439 | 1538.0468 | 1541.8191 |
| 1544.2529 | 1548.2692 | 1553.5414 |
| 1574.2087 | 1579.0012 | 1670.3930 |
| 1672.5219 | 1673.3149 | 1673.9335 |
| 1677.4648 | 1681.9205 | 1683.8384 |
| 1685.7461 | 1686.9578 | 1691.2648 |
| 1695.4504 | 1699.5410 | 1700.1150 |
| 1701.4653 | 1714.6338 | 1741.0081 |
| 3068.1843 | 3069.3691 | 3071.1811 |
| 3081.6347 | 3083.4042 | 3131.1059 |
| 3135.7546 | 3135.8372 | 3146.7204 |
| 3151.5286 | 3164.0806 | 3168.0881 |
| 3169.5713 | 3182.0764 | 3184.3489 |
| 3188.6747 | 3189.0222 | 3195.9579 |
| 3197.4173 | 3202.5339 | 3202.8846 |
| 3204.9340 | 3205.1822 | 3206.8957 |
| 3209.9468 | 3213.5952 | 3213.8326 |
| 3217.2937 | 3218.4825 | 3220.3705 |
| 3221.4641 | 3226.5910 | 3228.5241 |
| 3230.6444 | 3232.0685 | 3232.0741 |
| 3234.0507 | 3235.1794 | 3237.0727 |
| 3246.1505 | 3250.6263 | 3252.4333 |

### **<sup>os</sup>TS12RR**

Zero-point correction=0.775226

Thermal correction to Energy=0.823169

Thermal correction to Enthalpy=0.824113

Thermal correction to Gibbs Free Energy=0.688998

Sum of electronic and zero-point Energies=-3208.074928

Sum of electronic and thermal Energies=-3208.026985

Sum of electronic and thermal Enthalpies=-3208.026041

Sum of electronic and thermal Free Energies=-3208.161155

### Cartesian coordinate

|   |            |             |             |
|---|------------|-------------|-------------|
| N | 2.79980000 | -0.99736800 | -1.58411800 |
| N | 4.09709700 | -1.46157000 | -1.58171500 |
| C | 4.58083400 | -2.00716400 | -2.85150100 |

|   |             |             |             |
|---|-------------|-------------|-------------|
| C | 1.74669800  | -1.89472800 | -1.75617300 |
| C | 0.46029500  | -1.48492400 | -1.71587200 |
| C | 0.14040000  | -0.11752800 | -1.41423300 |
| C | 1.23859400  | 0.76207500  | -1.23525500 |
| C | 2.54017300  | 0.34155800  | -1.25916700 |
| C | -0.84082700 | -0.26830400 | 0.74311300  |
| C | -2.12492400 | 0.23524800  | 0.51978800  |
| C | -2.98244500 | -0.43124900 | -0.37352900 |
| O | -2.69973100 | -1.49723300 | -1.02209500 |
| S | 4.56093400  | -2.36817100 | -0.20032100 |
| O | 3.64197400  | -1.97225400 | 0.85246900  |
| C | 6.16639600  | -1.70209100 | 0.13408300  |
| O | 4.71162100  | -3.76840100 | -0.58176500 |
| C | 7.29549100  | -2.45790100 | -0.15668500 |
| C | 8.54892300  | -1.91388900 | 0.11062700  |
| C | 8.67503300  | -0.63562700 | 0.65839100  |
| C | 7.51510300  | 0.09845200  | 0.93970000  |
| C | 6.25611600  | -0.42359800 | 0.68466000  |
| C | 10.02944300 | -0.04944200 | 0.95729400  |
| H | 4.39283500  | -1.26241800 | -3.62612200 |
| H | 5.65820000  | -2.16808300 | -2.76583400 |
| H | 4.09943900  | -2.95282300 | -3.11995600 |
| H | -0.34522700 | -2.19607100 | -1.85777600 |
| H | -0.83736200 | 0.25820000  | -1.68161400 |
| H | 1.06296900  | 1.81385600  | -1.03246200 |
| H | -0.69219700 | -1.31909300 | 0.51231100  |
| H | 7.18498800  | -3.45389200 | -0.57276000 |
| H | 9.44118600  | -2.49269800 | -0.10838100 |
| H | 7.59986600  | 1.09728200  | 1.35910200  |
| H | 5.35774500  | 0.14690200  | 0.90746900  |
| H | 10.16470600 | 0.07797600  | 2.03563900  |
| H | 10.83142400 | -0.69176800 | 0.58890100  |
| H | 10.13843100 | 0.93623200  | 0.49639800  |
| C | 0.15268000  | 0.35101900  | 1.60607300  |
| C | 1.31644700  | -0.36679700 | 1.93303600  |
| C | 0.04520000  | 1.67200300  | 2.08279800  |
| C | 2.30060100  | 0.18185200  | 2.74715000  |
| H | 1.44651400  | -1.36930600 | 1.53608100  |
| C | 1.02248000  | 2.21534600  | 2.90900500  |
| H | -0.81437900 | 2.27722200  | 1.80645000  |
| C | 2.15188000  | 1.47106600  | 3.25746400  |
| H | 3.18655400  | -0.40402200 | 2.97273400  |
| H | 0.90573300  | 3.22939900  | 3.28067300  |
| H | 2.91218900  | 1.89921300  | 3.90345100  |

|    |             |             |             |
|----|-------------|-------------|-------------|
| H  | -2.45126400 | 1.15793300  | 0.98830400  |
| C  | -6.45759800 | -3.15660200 | 1.10228400  |
| C  | -5.24628200 | -2.78080700 | 0.51616600  |
| C  | -4.03559300 | -3.01475300 | 1.16577400  |
| C  | -4.06394800 | -3.61236100 | 2.42442900  |
| C  | -5.27325900 | -3.97855800 | 3.01618300  |
| C  | -6.47965200 | -3.75950500 | 2.35488700  |
| C  | -7.62616500 | -2.83121500 | 0.21137100  |
| C  | -6.95277400 | -2.58499800 | -1.15591900 |
| C  | -5.48150600 | -2.17316700 | -0.85529300 |
| H  | -3.10327000 | -2.74544300 | 0.67958700  |
| H  | -3.13117700 | -3.80128100 | 2.94595700  |
| H  | -5.27371500 | -4.44848900 | 3.99493100  |
| H  | -7.42066100 | -4.06066700 | 2.80619800  |
| H  | -8.14853700 | -1.93951800 | 0.57602000  |
| H  | -6.91012000 | -3.52893600 | -1.70349700 |
| H  | -8.36598600 | -3.63335100 | 0.15361800  |
| H  | -4.76219000 | -2.51497100 | -1.59790500 |
| N  | -5.41042300 | -0.69589900 | -0.85239600 |
| O  | -7.63249400 | -1.69295500 | -2.01781700 |
| C  | -4.33732100 | 0.08439100  | -0.52514700 |
| C  | -6.48489400 | 0.13231700  | -1.01801200 |
| N  | -4.84270900 | 1.34711600  | -0.49806600 |
| N  | -6.18316000 | 1.37445600  | -0.80123600 |
| C  | -7.80475100 | -0.40001700 | -1.48715500 |
| H  | -8.54029700 | -0.37756600 | -0.67382700 |
| H  | -8.17664100 | 0.23345400  | -2.29446400 |
| C  | -4.16738100 | 2.58966100  | -0.33902300 |
| C  | -4.72558400 | 3.54399400  | 0.50439200  |
| C  | -2.99568500 | 2.85297000  | -1.04692800 |
| C  | -4.09840900 | 4.77606600  | 0.65820700  |
| C  | -2.36192500 | 4.07674000  | -0.88586400 |
| C  | -2.91868200 | 5.02670400  | -0.03173000 |
| H  | -4.51663500 | 5.53041200  | 1.31431700  |
| H  | -1.44889300 | 4.29982100  | -1.42552900 |
| H  | -2.57972200 | 2.09901200  | -1.70600100 |
| H  | -5.64533900 | 3.31916900  | 1.03222000  |
| Cl | -2.12150500 | 6.56405900  | 0.16774500  |
| H  | 2.05075300  | -2.91967100 | -1.93673400 |
| C  | 3.65939800  | 1.26234100  | -0.97866200 |
| C  | 4.80983000  | 1.33663500  | -1.77718200 |
| C  | 3.54760200  | 2.11622000  | 0.12597100  |
| C  | 5.82769600  | 2.22814500  | -1.46480700 |
| H  | 4.90489600  | 0.70171200  | -2.65074200 |

|   |            |            |             |
|---|------------|------------|-------------|
| C | 4.57208900 | 3.00648500 | 0.43782400  |
| H | 2.66438200 | 2.05293500 | 0.75402800  |
| C | 5.71840400 | 3.06086100 | -0.35121800 |
| H | 6.71304200 | 2.27078800 | -2.09134800 |
| H | 4.47304300 | 3.64914100 | 1.30745700  |
| H | 6.52095000 | 3.74919000 | -0.10491600 |

Variable frequencies

|           |          |          |
|-----------|----------|----------|
| -541.1759 | 10.2799  | 12.3826  |
| 14.5682   | 20.1904  | 23.4113  |
| 29.4818   | 32.7078  | 34.2525  |
| 46.3092   | 47.6514  | 50.2282  |
| 57.4021   | 63.8554  | 70.8186  |
| 74.2616   | 82.1466  | 88.3022  |
| 93.8656   | 95.0721  | 104.4117 |
| 108.6364  | 120.0030 | 126.1043 |
| 135.5912  | 145.8988 | 151.3771 |
| 164.6089  | 174.6042 | 180.1420 |
| 191.7461  | 196.4937 | 204.3925 |
| 207.1100  | 211.1774 | 224.6936 |
| 239.5310  | 253.7338 | 263.2317 |
| 263.9229  | 266.4465 | 272.6165 |
| 283.6377  | 293.9522 | 308.6254 |
| 312.3127  | 324.8071 | 338.0030 |
| 346.9244  | 351.5742 | 358.1106 |
| 363.1788  | 378.7221 | 381.1587 |
| 399.5000  | 411.9421 | 420.4505 |
| 422.7637  | 423.7601 | 426.5555 |
| 431.5956  | 442.9515 | 453.0139 |
| 470.6546  | 480.9739 | 487.4128 |
| 495.2890  | 497.1938 | 502.5852 |
| 519.5216  | 528.4060 | 536.3473 |
| 550.8461  | 556.0953 | 561.1522 |
| 575.5720  | 579.4602 | 582.2121 |
| 594.8516  | 607.9368 | 617.7573 |
| 628.2831  | 630.2026 | 632.0120 |
| 640.6511  | 643.2141 | 651.2926 |
| 657.3711  | 658.8191 | 660.3331 |
| 686.2967  | 698.4823 | 712.2024 |
| 716.3095  | 719.6641 | 721.7347 |
| 726.7381  | 728.2773 | 750.9797 |
| 760.3360  | 766.1580 | 772.9862 |
| 774.7545  | 780.2019 | 783.7930 |
| 790.9293  | 820.2534 | 830.1117 |

|           |           |           |
|-----------|-----------|-----------|
| 839.0070  | 842.1458  | 847.1602  |
| 848.7199  | 852.4060  | 852.7964  |
| 858.4113  | 871.5448  | 874.5595  |
| 879.1216  | 885.6161  | 892.2818  |
| 902.5299  | 916.8384  | 921.5597  |
| 928.6717  | 949.6501  | 961.6336  |
| 971.8839  | 985.2438  | 986.0006  |
| 987.4218  | 992.7372  | 999.6850  |
| 1000.4773 | 1006.6445 | 1010.4570 |
| 1011.6328 | 1012.6875 | 1013.3507 |
| 1015.6527 | 1025.5211 | 1026.2016 |
| 1027.0913 | 1032.6360 | 1036.4759 |
| 1043.1599 | 1046.8459 | 1052.4028 |
| 1063.4497 | 1067.8615 | 1070.5960 |
| 1072.3014 | 1074.0977 | 1091.9360 |
| 1096.8106 | 1115.3769 | 1117.9500 |
| 1122.5507 | 1123.3878 | 1124.7402 |
| 1134.6368 | 1137.5285 | 1139.8209 |
| 1144.6577 | 1146.9160 | 1152.5257 |
| 1157.6487 | 1167.1569 | 1175.9823 |
| 1177.4045 | 1181.3345 | 1184.2566 |
| 1196.6137 | 1199.7170 | 1205.4270 |
| 1206.9231 | 1210.0838 | 1212.7812 |
| 1220.9363 | 1223.8732 | 1234.1143 |
| 1238.8948 | 1244.9454 | 1253.3490 |
| 1257.3768 | 1270.3635 | 1275.5338 |
| 1299.2421 | 1316.1765 | 1320.4884 |
| 1323.3722 | 1326.2948 | 1331.1980 |
| 1331.7280 | 1337.3654 | 1340.6027 |
| 1341.6901 | 1349.3712 | 1354.5938 |
| 1356.2036 | 1361.0744 | 1369.5666 |
| 1371.4543 | 1378.2988 | 1381.8365 |
| 1383.5113 | 1384.2879 | 1413.9489 |
| 1421.4612 | 1424.1953 | 1436.8314 |
| 1456.1191 | 1461.7700 | 1465.8077 |
| 1468.5099 | 1470.6023 | 1489.6928 |
| 1493.7608 | 1496.0918 | 1496.6056 |
| 1498.3571 | 1498.5796 | 1508.3318 |
| 1510.7664 | 1515.8746 | 1517.3426 |
| 1534.4475 | 1535.6742 | 1545.8000 |
| 1550.2228 | 1552.7712 | 1562.3509 |
| 1576.6732 | 1595.9186 | 1658.3632 |
| 1664.0760 | 1669.4093 | 1677.6860 |
| 1680.2165 | 1683.3727 | 1684.9878 |

|           |           |           |
|-----------|-----------|-----------|
| 1691.7550 | 1693.2557 | 1694.5189 |
| 1703.0894 | 1705.7836 | 3072.0568 |
| 3075.3498 | 3076.8429 | 3090.9402 |
| 3131.6426 | 3143.8607 | 3147.5462 |
| 3156.2382 | 3158.7549 | 3165.8618 |
| 3184.1887 | 3187.3048 | 3192.2261 |
| 3192.4105 | 3196.2283 | 3199.7207 |
| 3205.3112 | 3206.1888 | 3209.7477 |
| 3210.7544 | 3212.3654 | 3215.0084 |
| 3216.4831 | 3217.6536 | 3219.3652 |
| 3220.4343 | 3222.1859 | 3222.8939 |
| 3225.5157 | 3230.4794 | 3231.1666 |
| 3232.1907 | 3234.1162 | 3234.9541 |
| 3238.6838 | 3242.7228 | 3244.7841 |
| 3245.2853 | 3246.0843 | 3251.1625 |

## M12RR

Zero-point correction=0.779819

Thermal correction to Energy=0.827487

Thermal correction to Enthalpy=0.828431

Thermal correction to Gibbs Free Energy=0.694584

Sum of electronic and zero-point Energies=-3208.114217

Sum of electronic and thermal Energies=-3208.066548

Sum of electronic and thermal Enthalpies=-3208.065604

Sum of electronic and thermal Free Energies=-3208.199451

### Cartesian coordinate

|   |             |             |             |
|---|-------------|-------------|-------------|
| N | -2.93739100 | 1.75183500  | -0.55332600 |
| N | -3.93719400 | 1.56065700  | 0.40090700  |
| C | -4.57155700 | 2.78734000  | 0.87723300  |
| C | -1.73401500 | 2.35605900  | -0.13010500 |
| C | -0.54547300 | 2.05091200  | -0.64725200 |
| C | -0.34873900 | 0.91206400  | -1.60853000 |
| C | -1.68358100 | 0.45663500  | -2.13396000 |
| C | -2.86020400 | 0.78117100  | -1.58245000 |
| C | 0.43990900  | -0.24301300 | -0.89547800 |
| C | 1.83233700  | 0.20109500  | -0.54750300 |
| C | 2.37135000  | -0.03636100 | 0.68481900  |
| O | 1.91474200  | -0.60744000 | 1.72220600  |
| S | -3.53133900 | 0.45586400  | 1.64637200  |
| O | -2.72265600 | -0.56626700 | 0.99919700  |
| C | -5.14637900 | -0.18058200 | 2.02013000  |
| O | -3.03486900 | 1.15666700  | 2.82735200  |



|   |             |             |             |
|---|-------------|-------------|-------------|
| C | -5.64875500 | -0.05020400 | 3.30799800  |
| C | -6.91467300 | -0.56062900 | 3.58587800  |
| C | -7.67073900 | -1.18655500 | 2.59369300  |
| C | -7.13456700 | -1.29798200 | 1.30309400  |
| C | -5.87445800 | -0.80277700 | 1.00569800  |
| C | -9.03819300 | -1.74139200 | 2.89357100  |
| H | -4.91500500 | 3.34112600  | 0.00289000  |
| H | -5.43469200 | 2.51384700  | 1.48835500  |
| H | -3.90265000 | 3.41437000  | 1.47684200  |
| H | 0.32877600  | 2.60133700  | -0.31756900 |
| H | 0.28101900  | 1.23614300  | -2.45221600 |
| H | -1.69648500 | -0.20533300 | -2.99375800 |
| H | -0.09229200 | -0.46037900 | 0.03840500  |
| H | -5.05459300 | 0.44474700  | 4.06891600  |
| H | -7.32142900 | -0.46672900 | 4.58840100  |
| H | -7.71493400 | -1.77862000 | 0.52000100  |
| H | -5.46073000 | -0.88837500 | 0.00496200  |
| H | -9.04122100 | -2.83163600 | 2.80088500  |
| H | -9.35764000 | -1.48636300 | 3.90578400  |
| H | -9.77969600 | -1.35189900 | 2.19051800  |
| C | 0.39810700  | -1.49253600 | -1.75941900 |
| C | -0.55781300 | -2.48467300 | -1.51616100 |
| C | 1.24856400  | -1.64298300 | -2.85761300 |
| C | -0.66838200 | -3.59129900 | -2.35838100 |
| H | -1.22541000 | -2.37093300 | -0.66439400 |
| C | 1.14249800  | -2.74561200 | -3.70058500 |
| H | 2.01045300  | -0.89096000 | -3.04508200 |
| C | 0.17952000  | -3.72338100 | -3.45682700 |
| H | -1.41690900 | -4.35175900 | -2.15450500 |
| H | 1.81489400  | -2.84445400 | -4.54766200 |
| H | 0.09530600  | -4.58391600 | -4.11332900 |
| H | 2.42927800  | 0.71697100  | -1.29703600 |
| C | 5.24173800  | -3.51588100 | 0.24137800  |
| C | 4.13033400  | -2.81995300 | 0.72583900  |
| C | 2.85380800  | -3.05890600 | 0.22493800  |
| C | 2.71311300  | -3.99196700 | -0.80083700 |
| C | 3.82185000  | -4.67682700 | -1.29874500 |
| C | 5.09468800  | -4.45175300 | -0.77555100 |
| C | 6.49751600  | -3.11235900 | 0.97040900  |
| C | 5.93260900  | -2.44230200 | 2.24121500  |
| C | 4.54296800  | -1.88241000 | 1.83864400  |
| H | 2.00104600  | -2.52782700 | 0.63705900  |
| H | 1.72746600  | -4.17906500 | -1.21570800 |
| H | 3.68933200  | -5.40210700 | -2.09592800 |

|    |             |             |             |
|----|-------------|-------------|-------------|
| H  | 5.95351300  | -5.00164700 | -1.14963700 |
| H  | 7.08327500  | -2.40980800 | 0.36548100  |
| H  | 5.75382900  | -3.21224600 | 2.99475300  |
| H  | 7.15244600  | -3.95197100 | 1.21475900  |
| H  | 3.81972500  | -1.82292200 | 2.65158100  |
| N  | 4.74522700  | -0.48666900 | 1.37135100  |
| O  | 6.77214700  | -1.49665600 | 2.87514400  |
| C  | 3.82842800  | 0.33742800  | 0.82443700  |
| C  | 5.92514900  | 0.20069800  | 1.44190100  |
| N  | 4.49096300  | 1.47439100  | 0.58439000  |
| N  | 5.80492800  | 1.40259400  | 0.95943300  |
| C  | 7.14448600  | -0.40970600 | 2.06187700  |
| H  | 7.86055600  | -0.70041800 | 1.28291900  |
| H  | 7.62541200  | 0.32883800  | 2.70554600  |
| C  | 3.97853600  | 2.71528900  | 0.09401000  |
| C  | 4.70382000  | 3.39902300  | -0.87307000 |
| C  | 2.80154500  | 3.23160800  | 0.62738100  |
| C  | 4.23784800  | 4.62713200  | -1.33029200 |
| C  | 2.33427700  | 4.45573400  | 0.16646800  |
| C  | 3.05556800  | 5.13998300  | -0.80876800 |
| H  | 4.78439300  | 5.17851600  | -2.08618000 |
| H  | 1.42081000  | 4.88112900  | 0.56599800  |
| H  | 2.25812800  | 2.68178100  | 1.38886200  |
| H  | 5.62486900  | 2.97577800  | -1.25734400 |
| Cl | 2.46823000  | 6.67620900  | -1.37954000 |
| H  | -1.86549100 | 3.12955500  | 0.61930800  |
| C  | -4.14374900 | 0.19241700  | -2.02977500 |
| C  | -5.30718700 | 0.96294800  | -2.13726200 |
| C  | -4.20772200 | -1.17479300 | -2.31454000 |
| C  | -6.50911900 | 0.37751500  | -2.51500000 |
| H  | -5.25997900 | 2.02544900  | -1.91896300 |
| C  | -5.41190900 | -1.76064000 | -2.69961400 |
| H  | -3.31073800 | -1.77763900 | -2.20133600 |
| C  | -6.56695300 | -0.98862800 | -2.79294800 |
| H  | -7.40510000 | 0.98570700  | -2.59024600 |
| H  | -5.44900000 | -2.82481200 | -2.91012200 |
| H  | -7.50806000 | -1.44661100 | -3.08115300 |

#### Variable frequencies

|         |         |         |
|---------|---------|---------|
| 11.7994 | 13.2484 | 18.7498 |
| 20.9933 | 27.3968 | 31.9032 |
| 37.2041 | 38.1722 | 42.8585 |
| 52.7698 | 54.2821 | 58.7660 |
| 69.4659 | 72.5377 | 75.7292 |

|           |           |           |
|-----------|-----------|-----------|
| 79.3428   | 82.2751   | 84.9387   |
| 92.1941   | 96.2767   | 100.0773  |
| 107.3233  | 123.4902  | 139.7837  |
| 143.0346  | 158.5359  | 167.4129  |
| 174.2840  | 182.9403  | 189.2037  |
| 200.4337  | 210.2423  | 215.2721  |
| 221.8088  | 230.4864  | 236.9817  |
| 251.5695  | 253.8649  | 263.7978  |
| 266.8986  | 282.8855  | 290.3491  |
| 303.4945  | 312.3556  | 312.9691  |
| 322.9970  | 330.4716  | 348.6345  |
| 356.3335  | 363.7251  | 371.6495  |
| 373.4025  | 387.6798  | 410.0796  |
| 417.4318  | 418.2673  | 420.7116  |
| 424.0426  | 426.9973  | 435.9267  |
| 452.4616  | 457.8461  | 469.1774  |
| 476.1318  | 490.7157  | 496.1713  |
| 500.5019  | 521.9867  | 526.3412  |
| 538.0497  | 538.4215  | 553.1691  |
| 554.0282  | 572.9464  | 585.3062  |
| 589.1907  | 593.5350  | 609.1924  |
| 620.3946  | 626.4202  | 629.4193  |
| 632.4463  | 635.0926  | 644.1166  |
| 648.0353  | 652.4255  | 659.8586  |
| 676.0831  | 686.1258  | 703.9646  |
| 707.0866  | 712.8676  | 717.8406  |
| 724.1485  | 724.4800  | 725.9716  |
| 731.3138  | 756.4553  | 760.9058  |
| 767.5701  | 776.4572  | 787.4625  |
| 787.8413  | 792.2498  | 805.3654  |
| 814.1310  | 818.1072  | 838.8024  |
| 842.2885  | 848.6341  | 849.5640  |
| 854.7009  | 861.1885  | 873.6891  |
| 875.3904  | 879.1389  | 880.3691  |
| 880.5424  | 892.4834  | 906.2988  |
| 924.2449  | 933.7607  | 951.3646  |
| 962.1138  | 971.3857  | 979.6403  |
| 990.8875  | 991.4242  | 994.7588  |
| 996.1660  | 1002.2966 | 1004.3506 |
| 1008.2261 | 1010.5265 | 1012.9786 |
| 1013.5096 | 1016.9949 | 1019.1352 |
| 1025.1998 | 1031.8338 | 1033.4401 |
| 1037.2695 | 1042.1068 | 1048.2561 |
| 1056.6747 | 1066.1228 | 1066.5892 |

|           |           |           |
|-----------|-----------|-----------|
| 1069.1773 | 1072.7753 | 1073.7376 |
| 1083.7086 | 1097.2140 | 1103.2931 |
| 1111.0212 | 1116.0701 | 1123.5668 |
| 1125.5109 | 1131.4736 | 1132.5505 |
| 1141.1443 | 1144.8012 | 1148.2054 |
| 1155.6418 | 1164.5300 | 1166.7745 |
| 1178.1713 | 1179.2256 | 1181.9870 |
| 1182.7291 | 1184.1521 | 1198.8101 |
| 1198.9658 | 1202.5712 | 1207.9115 |
| 1209.3883 | 1213.1982 | 1222.0918 |
| 1236.1915 | 1238.0188 | 1239.4507 |
| 1250.8275 | 1254.9627 | 1260.7049 |
| 1277.1464 | 1282.4922 | 1293.2909 |
| 1297.8997 | 1300.2380 | 1311.5522 |
| 1325.2636 | 1329.3548 | 1333.5478 |
| 1335.9275 | 1339.5744 | 1341.8775 |
| 1349.2506 | 1354.7966 | 1355.7225 |
| 1358.1998 | 1360.8769 | 1362.4729 |
| 1364.6037 | 1372.7957 | 1378.0199 |
| 1384.4184 | 1385.8235 | 1419.7575 |
| 1424.2609 | 1428.5119 | 1444.8213 |
| 1453.8751 | 1456.5222 | 1463.3976 |
| 1466.8201 | 1483.2636 | 1494.1864 |
| 1494.6749 | 1495.7397 | 1497.5618 |
| 1503.1997 | 1508.0513 | 1508.9334 |
| 1513.2031 | 1519.0792 | 1521.0219 |
| 1535.8879 | 1541.1451 | 1548.1013 |
| 1550.7177 | 1554.9379 | 1576.3999 |
| 1668.7052 | 1670.7237 | 1673.9066 |
| 1674.5625 | 1680.4322 | 1687.4658 |
| 1692.4689 | 1693.8561 | 1695.7626 |
| 1698.1366 | 1700.2402 | 1726.5464 |
| 1743.2889 | 1787.0716 | 3013.3609 |
| 3071.3330 | 3072.4912 | 3075.1860 |
| 3085.1433 | 3094.0856 | 3136.5207 |
| 3146.2167 | 3151.6648 | 3153.8566 |
| 3165.6861 | 3167.8374 | 3172.5822 |
| 3179.7481 | 3183.3070 | 3189.0851 |
| 3192.5104 | 3196.1468 | 3196.4543 |
| 3202.8046 | 3203.8012 | 3205.3985 |
| 3208.6998 | 3212.9405 | 3214.6970 |
| 3215.3444 | 3217.8097 | 3220.1719 |
| 3220.3716 | 3222.8033 | 3225.0247 |
| 3229.8867 | 3232.7862 | 3234.1304 |

|           |           |           |
|-----------|-----------|-----------|
| 3236.6239 | 3238.7797 | 3240.1499 |
| 3246.9967 | 3248.8000 | 3253.7168 |

## **<sup>2</sup>TS13RR**

Zero-point correction=0.599837

Thermal correction to Energy=0.635084

Thermal correction to Enthalpy=0.636028

Thermal correction to Gibbs Free Energy=0.528167

Sum of electronic and zero-point Energies=-2294.315487

Sum of electronic and thermal Energies=-2294.280241

Sum of electronic and thermal Enthalpies=-2294.279296

Sum of electronic and thermal Free Energies=-2294.387157

### Cartesian coordinate

|   |             |             |             |
|---|-------------|-------------|-------------|
| N | 3.96574000  | 1.41902700  | -1.97847300 |
| C | 2.76211000  | 2.02247400  | -1.97185300 |
| C | 1.89461200  | 2.03016500  | -0.90643800 |
| C | 2.21980400  | 1.27631600  | 0.27987500  |
| C | 3.58749100  | 0.82378500  | 0.32199400  |
| C | 4.36546800  | 0.83954500  | -0.82233000 |
| C | 1.10288000  | -0.26877400 | 0.17765000  |
| C | -0.28339700 | 0.14436200  | 0.25066600  |
| C | -1.07114000 | 0.06121900  | -0.87905100 |
| O | -0.79734000 | -0.32119100 | -2.05037500 |
| H | 0.92923700  | 2.51711300  | -0.98445300 |
| H | 1.79609800  | 1.62196500  | 1.22394000  |
| H | 3.98274400  | 0.41355100  | 1.24469100  |
| H | 1.36360600  | -0.58917900 | -0.83259000 |
| C | 1.62583000  | -1.20656000 | 1.20672200  |
| C | 1.14845000  | -1.23692200 | 2.52193100  |
| C | 2.64345500  | -2.10269800 | 0.84930500  |
| C | 1.66002000  | -2.14513000 | 3.44470700  |
| H | 0.35715600  | -0.55802100 | 2.82519900  |
| C | 3.15540400  | -3.01244300 | 1.76983900  |
| H | 3.02950600  | -2.08192900 | -0.16738200 |
| C | 2.66182800  | -3.03946100 | 3.07334300  |
| H | 1.27051900  | -2.15791800 | 4.45808500  |
| H | 3.93749000  | -3.70227000 | 1.46629600  |
| H | 3.05554900  | -3.74975800 | 3.79320900  |
| H | -0.73585000 | 0.45275900  | 1.18865100  |
| C | -3.34460000 | -3.62339900 | 0.22488300  |
| C | -2.45933500 | -2.86430000 | -0.54612700 |
| C | -1.08150000 | -2.96212400 | -0.36993400 |

|    |             |             |             |
|----|-------------|-------------|-------------|
| C  | -0.60214800 | -3.81031000 | 0.62789600  |
| C  | -1.48479400 | -4.55412800 | 1.41201200  |
| C  | -2.86207500 | -4.47650100 | 1.21006600  |
| C  | -4.77404500 | -3.37184500 | -0.18190700 |
| C  | -4.60560200 | -2.72820100 | -1.57507800 |
| C  | -3.22908200 | -2.01611200 | -1.53463200 |
| H  | -0.40916400 | -2.38671500 | -0.99949100 |
| H  | 0.46771300  | -3.88522900 | 0.79902800  |
| H  | -1.09146000 | -5.21024400 | 2.18223600  |
| H  | -3.54355300 | -5.07418700 | 1.80816400  |
| H  | -5.25626300 | -2.68637100 | 0.52555700  |
| H  | -4.53055200 | -3.51855600 | -2.32493800 |
| H  | -5.38491300 | -4.27629500 | -0.22376400 |
| H  | -2.74504600 | -1.90355800 | -2.50498900 |
| N  | -3.47101300 | -0.64006000 | -1.02768200 |
| O  | -5.66133800 | -1.89814200 | -2.01641900 |
| C  | -2.54833200 | 0.27431000  | -0.67262800 |
| C  | -4.70103300 | -0.08016400 | -0.81726600 |
| N  | -3.24858200 | 1.33232800  | -0.25817400 |
| N  | -4.59732600 | 1.12528800  | -0.33675600 |
| C  | -5.95834300 | -0.81975600 | -1.16151400 |
| H  | -6.46631200 | -1.14484300 | -0.24484100 |
| H  | -6.63029100 | -0.15188200 | -1.70330800 |
| C  | -2.74823700 | 2.60057100  | 0.16917700  |
| C  | -3.32642600 | 3.20496000  | 1.27792000  |
| C  | -1.72204700 | 3.20804300  | -0.54711900 |
| C  | -2.85592900 | 4.44505900  | 1.69366900  |
| C  | -1.24280000 | 4.44061100  | -0.12225800 |
| C  | -1.81356400 | 5.04539200  | 0.99502500  |
| H  | -3.28908100 | 4.93924000  | 2.55519600  |
| H  | -0.44051000 | 4.93429400  | -0.65839500 |
| H  | -1.31218900 | 2.72512500  | -1.42867000 |
| H  | -4.13618200 | 2.71083400  | 1.80254100  |
| Cl | -1.21635900 | 6.59225700  | 1.52167000  |
| H  | 2.49039500  | 2.53424900  | -2.89327500 |
| C  | 5.73220000  | 0.24588700  | -0.83145900 |
| C  | 6.68159700  | 0.71144000  | -1.74808700 |
| C  | 6.09420400  | -0.78089900 | 0.04767200  |
| C  | 7.96420700  | 0.17655600  | -1.77354700 |
| H  | 6.38899000  | 1.49673800  | -2.43625800 |
| C  | 7.37829800  | -1.31728100 | 0.02051500  |
| H  | 5.36089000  | -1.18195600 | 0.74200900  |
| C  | 8.31919900  | -0.83915100 | -0.88804000 |
| H  | 8.69067000  | 0.55375000  | -2.48687300 |

|   |            |             |             |
|---|------------|-------------|-------------|
| H | 7.64086600 | -2.11856100 | 0.70455900  |
| H | 9.31996700 | -1.25915900 | -0.91016300 |

Variable frequencies

|           |           |           |
|-----------|-----------|-----------|
| -538.9426 | 11.7463   | 13.6020   |
| 22.1609   | 26.5904   | 32.8829   |
| 37.7608   | 45.3822   | 51.2713   |
| 54.2422   | 61.8464   | 78.1942   |
| 79.6335   | 82.7576   | 98.1649   |
| 108.8212  | 119.9390  | 127.9569  |
| 135.3148  | 144.9896  | 172.1227  |
| 187.2053  | 205.4857  | 215.6025  |
| 227.9962  | 239.6624  | 254.3093  |
| 264.9340  | 270.2614  | 274.4061  |
| 288.0722  | 313.3047  | 327.8812  |
| 344.7271  | 357.8650  | 373.0940  |
| 378.8669  | 402.0770  | 413.5659  |
| 414.9612  | 423.5401  | 424.6440  |
| 426.5268  | 445.1962  | 460.6443  |
| 466.7573  | 479.0202  | 486.4700  |
| 496.5936  | 525.8446  | 536.3343  |
| 538.9834  | 555.2688  | 574.7604  |
| 590.8445  | 595.4306  | 606.7285  |
| 619.4768  | 626.5581  | 630.8199  |
| 631.9226  | 642.7108  | 645.9262  |
| 652.4436  | 687.0606  | 708.3153  |
| 710.6044  | 718.0775  | 723.6414  |
| 726.9582  | 731.7196  | 739.8472  |
| 757.7389  | 765.7493  | 773.4075  |
| 777.1021  | 789.2294  | 789.8821  |
| 798.6427  | 804.4301  | 815.6538  |
| 848.0337  | 852.9817  | 853.9044  |
| 863.2548  | 865.5446  | 873.5979  |
| 885.8000  | 887.5252  | 902.6752  |
| 913.3364  | 932.2239  | 933.9176  |
| 959.6047  | 979.7512  | 982.0539  |
| 986.9740  | 989.4727  | 991.5920  |
| 1003.0906 | 1008.9514 | 1009.2744 |
| 1010.7296 | 1015.6509 | 1017.4269 |
| 1018.8525 | 1024.7210 | 1028.0934 |
| 1032.3951 | 1046.3989 | 1054.4931 |
| 1063.4172 | 1067.0032 | 1069.2244 |
| 1077.7673 | 1079.1642 | 1083.1414 |
| 1099.5892 | 1110.1896 | 1114.7375 |

|           |           |           |
|-----------|-----------|-----------|
| 1118.3389 | 1127.6567 | 1131.6146 |
| 1133.7554 | 1140.4495 | 1148.2114 |
| 1155.6014 | 1163.8768 | 1169.3938 |
| 1178.9344 | 1182.3016 | 1183.4383 |
| 1188.5702 | 1199.5641 | 1201.2628 |
| 1206.3563 | 1207.7444 | 1214.4462 |
| 1240.3598 | 1241.9832 | 1250.0302 |
| 1258.6160 | 1261.3950 | 1276.0171 |
| 1301.2672 | 1305.9163 | 1315.9443 |
| 1318.5139 | 1326.1535 | 1328.3786 |
| 1341.3064 | 1343.5634 | 1344.6098 |
| 1353.6884 | 1359.7826 | 1365.4932 |
| 1365.8080 | 1370.1319 | 1376.6356 |
| 1383.6616 | 1419.8899 | 1432.9793 |
| 1465.0408 | 1467.1932 | 1488.2253 |
| 1493.9541 | 1500.7460 | 1503.6741 |
| 1504.7642 | 1514.0094 | 1519.9820 |
| 1520.6067 | 1535.0583 | 1536.2831 |
| 1542.6562 | 1553.1664 | 1564.3054 |
| 1579.0071 | 1638.0738 | 1667.4278 |
| 1671.9618 | 1676.3763 | 1678.2880 |
| 1680.0123 | 1688.2632 | 1689.4215 |
| 1691.7685 | 1701.4370 | 1702.6234 |
| 3072.7933 | 3087.3861 | 3131.8305 |
| 3142.6713 | 3153.7576 | 3153.8737 |
| 3167.3798 | 3173.0615 | 3179.8290 |
| 3187.0130 | 3192.3296 | 3193.2695 |
| 3200.6684 | 3203.0399 | 3204.4766 |
| 3206.7838 | 3212.8492 | 3214.3895 |
| 3218.1624 | 3219.6562 | 3222.4389 |
| 3222.8073 | 3230.2897 | 3233.5453 |
| 3236.1176 | 3237.2486 | 3238.0595 |
| 3238.2865 | 3257.1099 | 3261.2132 |

## **<sup>2</sup>M13RR**

Zero-point correction=0.601075

Thermal correction to Energy=0.636346

Thermal correction to Enthalpy=0.637290

Thermal correction to Gibbs Free Energy=0.530547

Sum of electronic and zero-point Energies=-2294.322271

Sum of electronic and thermal Energies=-2294.287000

Sum of electronic and thermal Enthalpies=-2294.286056

Sum of electronic and thermal Free Energies=-2294.392799



Cartesian coordinate

|   |             |             |             |
|---|-------------|-------------|-------------|
| N | 4.37464900  | 1.69594000  | -0.99043500 |
| C | 3.19151600  | 2.32648700  | -0.78728300 |
| C | 2.16271500  | 1.84358100  | -0.03300300 |
| C | 2.25822500  | 0.52347600  | 0.63909000  |
| C | 3.62172700  | -0.04833900 | 0.48721500  |
| C | 4.56062000  | 0.51042000  | -0.34401900 |
| C | 1.14385800  | -0.47294100 | 0.08950100  |
| C | -0.23127300 | 0.10715900  | 0.23294500  |
| C | -1.09690100 | 0.08395400  | -0.82387200 |
| O | -0.98202200 | -0.36734500 | -2.00494400 |
| H | 1.23697000  | 2.40044700  | 0.05784200  |
| H | 2.01389800  | 0.62722200  | 1.71198600  |
| H | 3.85669800  | -0.95157200 | 1.03948600  |
| H | 1.33284700  | -0.60048200 | -0.98232700 |
| C | 1.32917800  | -1.81911700 | 0.76945000  |
| C | 0.88879300  | -2.03290100 | 2.07807200  |
| C | 2.02049700  | -2.84882500 | 0.12392800  |
| C | 1.14196300  | -3.23618700 | 2.73046500  |
| H | 0.33340900  | -1.24981900 | 2.58779600  |
| C | 2.27837600  | -4.05609100 | 0.77296600  |
| H | 2.36971200  | -2.69394100 | -0.89453100 |
| C | 1.84274900  | -4.25185200 | 2.08177100  |
| H | 0.79023600  | -3.38262000 | 3.74718900  |
| H | 2.81760300  | -4.84297300 | 0.25425700  |
| H | 2.04312600  | -5.18945400 | 2.59045700  |
| H | -0.54701700 | 0.53651200  | 1.18092700  |
| C | -4.06573800 | -3.16574600 | 0.21332500  |
| C | -3.07439700 | -2.53216000 | -0.54211400 |
| C | -1.74239600 | -2.92689900 | -0.46610400 |
| C | -1.41246300 | -3.96044000 | 0.40838000  |
| C | -2.39529200 | -4.58458700 | 1.17718100  |
| C | -3.73169900 | -4.19857300 | 1.08072200  |
| C | -5.42548400 | -2.58631700 | -0.08260000 |
| C | -5.18439000 | -1.87971500 | -1.43380400 |
| C | -3.68814200 | -1.47140800 | -1.42528900 |
| H | -0.99277800 | -2.43549900 | -1.08017900 |
| H | -0.37805200 | -4.27821700 | 0.49010600  |
| H | -2.11595700 | -5.38942800 | 1.85043700  |
| H | -4.49760600 | -4.70102400 | 1.66424500  |
| H | -5.71772600 | -1.87587900 | 0.70036300  |
| H | -5.30571300 | -2.60887200 | -2.23771700 |
| H | -6.21771100 | -3.33503000 | -0.15367400 |

|    |             |             |             |
|----|-------------|-------------|-------------|
| H  | -3.22827000 | -1.39902500 | -2.41115600 |
| N  | -3.60501900 | -0.10913600 | -0.83912700 |
| O  | -6.06767700 | -0.82411000 | -1.75713800 |
| C  | -2.49217800 | 0.58964000  | -0.54127400 |
| C  | -4.67783700 | 0.69479800  | -0.56859200 |
| N  | -2.93427700 | 1.77405300  | -0.11031100 |
| N  | -4.29965000 | 1.85323500  | -0.11297900 |
| C  | -6.07879200 | 0.23380800  | -0.82841100 |
| H  | -6.56235500 | -0.04944800 | 0.11510300  |
| H  | -6.64920100 | 1.05175900  | -1.27134100 |
| C  | -2.17157100 | 2.94080100  | 0.20651200  |
| C  | -2.52764500 | 3.68739400  | 1.32237400  |
| C  | -1.13846400 | 3.33243400  | -0.63918100 |
| C  | -1.82289400 | 4.84992700  | 1.61280600  |
| C  | -0.43098300 | 4.49132200  | -0.34406700 |
| C  | -0.77798900 | 5.23652400  | 0.78019100  |
| H  | -2.07969800 | 5.44927500  | 2.47817400  |
| H  | 0.37973400  | 4.81814000  | -0.98542200 |
| H  | -0.88839800 | 2.73661900  | -1.51142500 |
| H  | -3.35118700 | 3.36405700  | 1.94876100  |
| Cl | 0.11078000  | 6.68685300  | 1.14613500  |
| H  | 3.08986700  | 3.28821900  | -1.28691500 |
| C  | 5.87753300  | -0.15003000 | -0.56651700 |
| C  | 6.98705900  | 0.61416000  | -0.94240400 |
| C  | 6.03081900  | -1.53301600 | -0.41916600 |
| C  | 8.22506000  | 0.01246100  | -1.14161000 |
| H  | 6.85727100  | 1.68245200  | -1.07711900 |
| C  | 7.26939600  | -2.13424500 | -0.61883800 |
| H  | 5.17083100  | -2.14874200 | -0.17012600 |
| C  | 8.37245900  | -1.36299600 | -0.97657400 |
| H  | 9.07888700  | 0.61933400  | -1.42669100 |
| H  | 7.37030400  | -3.20919700 | -0.50537000 |
| H  | 9.33861200  | -1.83207400 | -1.13383000 |

#### Variable frequencies

|          |          |          |
|----------|----------|----------|
| 16.3337  | 21.4709  | 21.8756  |
| 29.6139  | 34.4085  | 40.8772  |
| 41.7646  | 53.1996  | 57.1721  |
| 75.2824  | 81.6231  | 84.0036  |
| 89.3384  | 98.8752  | 110.3731 |
| 118.8822 | 126.2204 | 138.6133 |
| 149.5299 | 169.0044 | 185.0377 |
| 208.2103 | 218.5228 | 220.7261 |
| 237.6452 | 253.7765 | 264.1423 |

|           |           |           |
|-----------|-----------|-----------|
| 268.1781  | 281.4336  | 287.6542  |
| 311.4631  | 323.3098  | 346.1942  |
| 356.0777  | 370.6582  | 375.3705  |
| 400.6810  | 410.3134  | 414.8383  |
| 418.9897  | 422.1221  | 425.7303  |
| 440.4001  | 457.5989  | 466.8586  |
| 478.2289  | 482.0402  | 497.8426  |
| 521.4583  | 538.2167  | 540.1947  |
| 551.5131  | 571.9511  | 591.3151  |
| 599.6544  | 609.3682  | 625.5060  |
| 627.2467  | 629.0017  | 632.0888  |
| 634.5009  | 645.6346  | 652.3228  |
| 669.1959  | 689.1000  | 708.4705  |
| 710.7506  | 720.6340  | 722.8861  |
| 726.8624  | 731.9742  | 749.5214  |
| 761.0920  | 770.8301  | 781.8357  |
| 790.2267  | 792.3525  | 793.3200  |
| 804.6231  | 815.7748  | 847.6255  |
| 851.2378  | 853.5592  | 856.1368  |
| 862.2405  | 873.9281  | 877.3667  |
| 885.9991  | 892.5442  | 906.3134  |
| 926.9435  | 930.6464  | 948.5078  |
| 956.6308  | 964.7525  | 980.9768  |
| 988.6276  | 996.4664  | 997.0506  |
| 999.0473  | 1006.2351 | 1008.1892 |
| 1009.4458 | 1016.2240 | 1016.8794 |
| 1018.0180 | 1028.5528 | 1028.9944 |
| 1033.0047 | 1048.0758 | 1053.6425 |
| 1055.3897 | 1067.2693 | 1072.7537 |
| 1073.7948 | 1077.2963 | 1088.4210 |
| 1098.0409 | 1107.5207 | 1109.1910 |
| 1120.9598 | 1124.7109 | 1131.1059 |
| 1137.0794 | 1141.8946 | 1154.8573 |
| 1160.3546 | 1166.4265 | 1171.3858 |
| 1180.6214 | 1181.7836 | 1182.2778 |
| 1194.0698 | 1201.0121 | 1202.9943 |
| 1206.1489 | 1206.5159 | 1208.2640 |
| 1236.0142 | 1240.1612 | 1251.8494 |
| 1262.4737 | 1267.0471 | 1275.7734 |
| 1293.4309 | 1300.2990 | 1301.7079 |
| 1309.6115 | 1324.3026 | 1329.1840 |
| 1339.5401 | 1340.8424 | 1345.7159 |
| 1353.5204 | 1360.8835 | 1361.8486 |
| 1362.2980 | 1368.3723 | 1375.2946 |

|           |           |           |
|-----------|-----------|-----------|
| 1381.8601 | 1385.5263 | 1419.7324 |
| 1457.6845 | 1463.0240 | 1469.7065 |
| 1482.9848 | 1494.9989 | 1502.6102 |
| 1503.6292 | 1509.5292 | 1510.1318 |
| 1520.9053 | 1531.5233 | 1537.7040 |
| 1544.5569 | 1549.5568 | 1563.5567 |
| 1580.5054 | 1638.9269 | 1674.3836 |
| 1675.2738 | 1675.7273 | 1680.3912 |
| 1688.0531 | 1695.2081 | 1695.4333 |
| 1697.9753 | 1704.2739 | 1720.9977 |
| 2976.5059 | 3071.7720 | 3085.6428 |
| 3101.9099 | 3137.0321 | 3148.3937 |
| 3173.1164 | 3180.9639 | 3182.3371 |
| 3183.7118 | 3187.8825 | 3196.9364 |
| 3197.5086 | 3203.7409 | 3209.5175 |
| 3212.8187 | 3215.0083 | 3217.9721 |
| 3220.0425 | 3220.7233 | 3230.2280 |
| 3230.6712 | 3231.4826 | 3232.7847 |
| 3234.9695 | 3237.8867 | 3239.0483 |
| 3240.5226 | 3244.1022 | 3261.8144 |

## **<sup>2</sup>TS5<sup>C2</sup>**

Zero-point correction=0.778552

Thermal correction to Energy=0.826223

Thermal correction to Enthalpy=0.827167

Thermal correction to Gibbs Free Energy=0.692565

Sum of electronic and zero-point Energies=-3207.925863

Sum of electronic and thermal Energies=-3207.878192

Sum of electronic and thermal Enthalpies=-3207.877248

Sum of electronic and thermal Free Energies=-3208.011850

### Cartesian coordinate

|   |             |             |             |
|---|-------------|-------------|-------------|
| N | -2.07884000 | 0.66028500  | 0.97154200  |
| N | -2.92555300 | -0.29124500 | 0.37999800  |
| C | -3.25759300 | -1.38219700 | 1.31010600  |
| C | -0.75490700 | 0.28629400  | 1.27418300  |
| C | -0.28037700 | 0.68224300  | 2.57475900  |
| C | -0.91929600 | 1.66969900  | 3.25268500  |
| C | -2.09818400 | 2.26568800  | 2.70799900  |
| C | -2.69923900 | 1.73277200  | 1.60264500  |
| C | 0.47180000  | 1.20189300  | -0.02433400 |
| C | 1.70417000  | 0.53889800  | 0.18457600  |

|   |             |             |             |
|---|-------------|-------------|-------------|
| C | 2.13941200  | -0.41290000 | -0.75353500 |
| O | 1.66220000  | -0.69816200 | -1.86342000 |
| S | -2.39014100 | -0.80193600 | -1.16519200 |
| O | -2.07057100 | 0.42556200  | -1.87987000 |
| C | -3.86300500 | -1.54421900 | -1.79092200 |
| O | -1.37056600 | -1.83935800 | -1.01207700 |
| C | -3.81219900 | -2.86680900 | -2.21958500 |
| C | -4.96504700 | -3.43510700 | -2.74909200 |
| C | -6.15023600 | -2.70073600 | -2.85017400 |
| C | -6.16516600 | -1.37303700 | -2.40302500 |
| C | -5.02633100 | -0.78091200 | -1.87711700 |
| C | -7.38394500 | -3.31683000 | -3.45183200 |
| H | -3.78028600 | -0.93477000 | 2.15734000  |
| H | -3.93204600 | -2.07745000 | 0.80822400  |
| H | -2.36625900 | -1.91554900 | 1.65966900  |
| H | 0.62290100  | 0.21112200  | 2.94919000  |
| H | -0.54648000 | 2.01190100  | 4.21206500  |
| H | -2.53712000 | 3.14279100  | 3.16619100  |
| H | -0.02189000 | 0.88267000  | -0.94311100 |
| H | -2.88863500 | -3.42950200 | -2.13718400 |
| H | -4.94504100 | -4.46634600 | -3.08801800 |
| H | -7.08416900 | -0.79838400 | -2.46777200 |
| H | -5.04028200 | 0.24493300  | -1.52111100 |
| H | -7.39685600 | -4.39888200 | -3.30763000 |
| H | -8.29093500 | -2.89490200 | -3.01417900 |
| H | -7.41462900 | -3.12394100 | -4.52898000 |
| C | 0.25583700  | 2.63123100  | 0.28524700  |
| C | 0.97937700  | 3.32110700  | 1.26581800  |
| C | -0.73865000 | 3.31388400  | -0.42729300 |
| C | 0.68998800  | 4.65205600  | 1.54642500  |
| H | 1.77124900  | 2.81774200  | 1.81321900  |
| C | -1.03115000 | 4.64325000  | -0.14355600 |
| H | -1.27830000 | 2.78215600  | -1.20675700 |
| C | -0.32251100 | 5.31315700  | 0.85183800  |
| H | 1.25512000  | 5.17681300  | 2.31024800  |
| H | -1.81294000 | 5.15399900  | -0.69658600 |
| H | -0.54873400 | 6.35010900  | 1.07798800  |
| H | 2.34627500  | 0.75822600  | 1.03383400  |
| C | 5.82379700  | 1.91970900  | -0.90595600 |
| C | 4.72671300  | 1.35987000  | -1.56834200 |
| C | 3.56722600  | 2.09139900  | -1.80566000 |
| C | 3.50059800  | 3.39687200  | -1.32191000 |
| C | 4.58330100  | 3.95257500  | -0.63810400 |
| C | 5.75681700  | 3.22603100  | -0.43558900 |

|    |             |             |             |
|----|-------------|-------------|-------------|
| C  | 6.96964600  | 0.93792400  | -0.83496200 |
| C  | 6.58955800  | -0.06939900 | -1.94294000 |
| C  | 5.04300900  | -0.06121100 | -1.95988200 |
| H  | 2.73184600  | 1.65342500  | -2.34445700 |
| H  | 2.59992500  | 3.98216700  | -1.47755100 |
| H  | 4.51511900  | 4.97169300  | -0.27126300 |
| H  | 6.60376000  | 3.67699400  | 0.07201400  |
| H  | 7.00483400  | 0.45857500  | 0.15165200  |
| H  | 6.92041400  | 0.32270100  | -2.90682700 |
| H  | 7.94718100  | 1.39047600  | -1.01206900 |
| H  | 4.60718000  | -0.39593000 | -2.90301800 |
| N  | 4.61015800  | -1.03383300 | -0.91664400 |
| O  | 7.13978400  | -1.36605600 | -1.86145400 |
| C  | 3.38980400  | -1.17966600 | -0.38487000 |
| C  | 5.41441300  | -1.97723700 | -0.33062600 |
| N  | 3.48281400  | -2.19251000 | 0.47043600  |
| N  | 4.74541200  | -2.69924600 | 0.52543200  |
| C  | 6.87248800  | -2.06509300 | -0.66921500 |
| H  | 7.46376700  | -1.68531600 | 0.17374400  |
| H  | 7.14616400  | -3.10830700 | -0.83525200 |
| C  | 2.40525300  | -2.76940500 | 1.21707600  |
| C  | 2.62384600  | -3.15413500 | 2.53455600  |
| C  | 1.16906800  | -2.92735700 | 0.59489100  |
| C  | 1.56691700  | -3.68885000 | 3.26193800  |
| C  | 0.11376000  | -3.45481700 | 1.32898200  |
| C  | 0.31959300  | -3.82243700 | 2.65527300  |
| H  | 1.70620600  | -3.99516200 | 4.29210100  |
| H  | -0.85335500 | -3.58652100 | 0.85651600  |
| H  | 1.01492400  | -2.64900600 | -0.44363400 |
| H  | 3.60471900  | -3.03576200 | 2.98111900  |
| Cl | -1.01018100 | -4.47044100 | 3.57006200  |
| H  | -0.53224100 | -0.72174100 | 0.93536400  |
| C  | -3.97805700 | 2.24756600  | 1.07141400  |
| C  | -4.98523600 | 2.62735400  | 1.96333800  |
| C  | -4.17468900 | 2.42187200  | -0.30404200 |
| C  | -6.17162700 | 3.17965600  | 1.48994200  |
| H  | -4.84349000 | 2.47177700  | 3.02851600  |
| C  | -5.35948900 | 2.97909800  | -0.77153400 |
| H  | -3.39764800 | 2.12189900  | -1.00033900 |
| C  | -6.36036200 | 3.35814000  | 0.12264700  |
| H  | -6.94943100 | 3.46509300  | 2.19023400  |
| H  | -5.50022300 | 3.12150800  | -1.83845800 |
| H  | -7.28454200 | 3.78981500  | -0.24721500 |

Variable frequencies

|           |          |          |
|-----------|----------|----------|
| -195.3512 | 10.7690  | 17.8980  |
| 21.9220   | 22.5672  | 27.0161  |
| 30.1713   | 30.4676  | 35.8856  |
| 43.2059   | 44.7226  | 47.0164  |
| 57.2016   | 60.2302  | 64.9586  |
| 73.9846   | 81.8470  | 86.4718  |
| 91.6953   | 93.8933  | 99.3814  |
| 104.7468  | 106.4288 | 127.3885 |
| 134.3714  | 139.6424 | 150.0976 |
| 162.2996  | 173.4224 | 187.7793 |
| 191.1392  | 199.9653 | 212.3103 |
| 216.6691  | 219.5937 | 232.8586 |
| 237.3281  | 249.8159 | 253.5065 |
| 258.4235  | 269.0834 | 271.3979 |
| 276.3497  | 281.9426 | 306.6368 |
| 313.7878  | 322.1669 | 339.4476 |
| 341.5981  | 344.9442 | 364.0376 |
| 377.7117  | 380.6845 | 395.9493 |
| 407.4874  | 414.6324 | 416.3727 |
| 418.5894  | 427.4170 | 431.7981 |
| 449.4931  | 457.5504 | 461.8734 |
| 462.8980  | 484.9947 | 493.5264 |
| 497.0943  | 513.1565 | 523.6433 |
| 524.6449  | 534.7026 | 540.4610 |
| 542.8696  | 552.9809 | 571.4032 |
| 583.3255  | 587.7636 | 593.4427 |
| 602.0558  | 607.0543 | 618.1897 |
| 625.9803  | 630.4761 | 636.3424 |
| 639.3511  | 643.3340 | 653.0111 |
| 663.1351  | 689.4300 | 692.4197 |
| 709.1295  | 716.7206 | 718.1443 |
| 722.9266  | 729.6297 | 734.1215 |
| 741.4776  | 756.7025 | 762.5281 |
| 766.5951  | 770.5099 | 780.1996 |
| 783.5672  | 792.3247 | 803.8462 |
| 808.1979  | 814.2839 | 829.9313 |
| 842.7194  | 845.4282 | 855.3386 |
| 857.6172  | 859.9250 | 873.2824 |
| 874.7300  | 878.7674 | 885.0394 |
| 887.8845  | 889.3780 | 900.3343 |
| 910.1434  | 921.0319 | 950.4801 |
| 966.9118  | 988.1956 | 989.4815 |
| 990.7185  | 994.4211 | 999.7172 |

|           |           |           |
|-----------|-----------|-----------|
| 1003.3466 | 1009.3879 | 1009.9257 |
| 1010.7445 | 1015.0076 | 1017.7208 |
| 1018.1313 | 1020.2500 | 1026.7792 |
| 1028.0437 | 1028.5854 | 1032.5883 |
| 1033.2861 | 1035.5648 | 1046.3463 |
| 1052.4270 | 1053.7407 | 1065.3798 |
| 1067.6600 | 1069.7901 | 1074.3451 |
| 1075.8272 | 1086.8676 | 1092.0789 |
| 1097.6141 | 1113.5070 | 1120.9840 |
| 1124.7000 | 1133.4082 | 1135.7203 |
| 1137.5436 | 1141.4008 | 1147.3815 |
| 1150.9370 | 1152.4023 | 1165.3907 |
| 1172.1493 | 1177.2634 | 1183.8117 |
| 1185.0367 | 1186.6014 | 1189.1310 |
| 1204.5939 | 1205.8131 | 1209.3464 |
| 1212.2998 | 1212.5473 | 1213.2472 |
| 1215.0677 | 1218.8838 | 1241.2922 |
| 1251.7955 | 1253.4972 | 1256.0495 |
| 1267.4321 | 1273.3105 | 1276.5513 |
| 1281.5148 | 1304.6247 | 1323.2215 |
| 1325.3665 | 1326.0983 | 1328.6782 |
| 1330.6104 | 1340.6861 | 1341.3742 |
| 1343.0404 | 1345.4749 | 1355.6323 |
| 1356.6531 | 1361.6268 | 1362.0346 |
| 1364.8635 | 1366.9529 | 1377.2094 |
| 1378.1086 | 1386.5064 | 1422.4986 |
| 1423.4972 | 1451.4960 | 1452.4185 |
| 1454.0153 | 1455.5848 | 1468.0881 |
| 1490.4880 | 1495.4301 | 1498.1346 |
| 1500.0068 | 1502.0691 | 1503.0968 |
| 1504.6194 | 1504.7487 | 1509.6933 |
| 1520.2100 | 1528.4144 | 1537.6362 |
| 1542.7928 | 1548.5767 | 1549.2348 |
| 1550.5062 | 1573.6835 | 1594.8704 |
| 1612.3499 | 1662.2292 | 1667.0302 |
| 1670.0283 | 1671.7585 | 1678.4493 |
| 1679.4689 | 1684.5364 | 1689.7137 |
| 1690.4720 | 1690.7359 | 1691.8288 |
| 1698.9469 | 1703.9169 | 3071.1535 |
| 3072.1184 | 3074.5878 | 3085.1786 |
| 3145.6829 | 3151.1836 | 3160.3365 |
| 3163.8048 | 3167.0749 | 3171.0769 |
| 3172.7113 | 3181.5685 | 3191.2074 |
| 3201.7317 | 3204.0795 | 3206.5879 |



|           |           |           |
|-----------|-----------|-----------|
| 3208.7419 | 3212.1353 | 3212.7623 |
| 3212.9576 | 3214.1476 | 3215.8515 |
| 3218.9863 | 3219.3459 | 3219.9547 |
| 3221.4209 | 3222.4514 | 3225.9070 |
| 3226.1570 | 3227.2293 | 3229.1870 |
| 3230.9801 | 3233.4236 | 3236.4285 |
| 3237.8629 | 3239.2100 | 3241.1523 |
| 3249.5153 | 3254.4946 | 3260.2539 |

## <sup>2</sup>M5C<sub>2</sub>

Zero-point correction=0.780199

Thermal correction to Energy=0.827878

Thermal correction to Enthalpy=0.828823

Thermal correction to Gibbs Free Energy=0.694327

Sum of electronic and zero-point Energies=-3207.933059

Sum of electronic and thermal Energies=-3207.885380

Sum of electronic and thermal Enthalpies=-3207.884435

Sum of electronic and thermal Free Energies=-3208.018931

### Cartesian coordinate

|   |             |             |             |
|---|-------------|-------------|-------------|
| N | -2.12158100 | 0.76350100  | 0.86709600  |
| N | -3.04024800 | -0.20851000 | 0.45624600  |
| C | -3.40963400 | -1.17979700 | 1.49435700  |
| C | -0.78826600 | 0.29406500  | 1.26664800  |
| C | -0.53464100 | 0.48322800  | 2.73263000  |
| C | -1.18326900 | 1.45960400  | 3.38633600  |
| C | -2.18561400 | 2.26322700  | 2.71396000  |
| C | -2.69948100 | 1.86178700  | 1.52703100  |
| C | 0.26734400  | 0.97046700  | 0.31023000  |
| C | 1.54050200  | 0.22464400  | 0.38937600  |
| C | 2.09763600  | -0.36573600 | -0.77771000 |
| O | 1.69428400  | -0.22560900 | -1.93272900 |
| S | -2.61088300 | -0.90266800 | -1.04021400 |
| O | -2.14091200 | 0.18923900  | -1.88116200 |
| C | -4.17646000 | -1.50437800 | -1.59007200 |
| O | -1.72114500 | -2.05126100 | -0.82340200 |
| C | -4.30885900 | -2.85032700 | -1.91051400 |
| C | -5.53803000 | -3.30266000 | -2.37979100 |
| C | -6.61780900 | -2.42877500 | -2.52805300 |
| C | -6.44912300 | -1.07917200 | -2.18988300 |
| C | -5.23280700 | -0.60362800 | -1.72341800 |
| C | -7.93794400 | -2.91693500 | -3.06085100 |
| H | -3.81390300 | -0.60929700 | 2.33276200  |

|   |             |             |             |
|---|-------------|-------------|-------------|
| H | -4.18723200 | -1.84014600 | 1.10567300  |
| H | -2.55494900 | -1.77915200 | 1.83165100  |
| H | 0.14667900  | -0.19612500 | 3.23822700  |
| H | -1.00105600 | 1.63415100  | 4.44255100  |
| H | -2.55001500 | 3.17589000  | 3.16932200  |
| H | -0.13164800 | 0.84072200  | -0.70093500 |
| H | -3.46582100 | -3.52174400 | -1.78842700 |
| H | -5.66058200 | -4.35150000 | -2.63214500 |
| H | -7.28600100 | -0.39468900 | -2.29207200 |
| H | -5.10282500 | 0.44008700  | -1.45001700 |
| H | -8.03985000 | -3.99726400 | -2.94263700 |
| H | -8.77205300 | -2.43010500 | -2.55051300 |
| H | -8.02491400 | -2.68676800 | -4.12749500 |
| C | 0.45411300  | 2.45798000  | 0.55469200  |
| C | 1.19743500  | 2.95297600  | 1.62934900  |
| C | -0.14732400 | 3.35597800  | -0.32988700 |
| C | 1.31404300  | 4.32541500  | 1.83001600  |
| H | 1.67800500  | 2.26870300  | 2.32205700  |
| C | -0.03282300 | 4.72894300  | -0.12835300 |
| H | -0.71475900 | 2.97000000  | -1.17302900 |
| C | 0.69642300  | 5.21622800  | 0.95448900  |
| H | 1.88978800  | 4.69927100  | 2.67082200  |
| H | -0.51438600 | 5.41656400  | -0.81588500 |
| H | 0.78623100  | 6.28594500  | 1.11328300  |
| H | 2.05301100  | 0.08654500  | 1.33891000  |
| C | 5.86812500  | 1.78058300  | -0.72112400 |
| C | 4.70452200  | 1.40786700  | -1.40330500 |
| C | 3.58278300  | 2.23397400  | -1.42679200 |
| C | 3.62262500  | 3.42732200  | -0.70804800 |
| C | 4.77099900  | 3.78736500  | -0.00138000 |
| C | 5.90621600  | 2.97657100  | -0.01416500 |
| C | 6.96097600  | 0.75584400  | -0.90958700 |
| C | 6.46472100  | -0.01115700 | -2.15516300 |
| C | 4.92109800  | 0.07299100  | -2.07505300 |
| H | 2.69686600  | 1.96572000  | -1.99367700 |
| H | 2.75105300  | 4.07551600  | -0.69840700 |
| H | 4.78492000  | 4.72036400  | 0.55288400  |
| H | 6.80559200  | 3.27869100  | 0.51328700  |
| H | 7.03179700  | 0.10186100  | -0.03118300 |
| H | 6.76571300  | 0.53229900  | -3.05313700 |
| H | 7.94810300  | 1.19401400  | -1.06848200 |
| H | 4.41764400  | -0.06313400 | -3.03319600 |
| N | 4.49494800  | -1.05840600 | -1.19517700 |
| O | 6.93772300  | -1.32766500 | -2.33937300 |

|    |             |             |             |
|----|-------------|-------------|-------------|
| C  | 3.31204300  | -1.23486900 | -0.59546500 |
| C  | 5.29106400  | -2.09978700 | -0.79920100 |
| N  | 3.41430700  | -2.35106300 | 0.11776400  |
| N  | 4.64951500  | -2.90296700 | 0.00718500  |
| C  | 6.71264800  | -2.20598300 | -1.26402400 |
| H  | 7.38629500  | -2.01215400 | -0.42004100 |
| H  | 6.90136800  | -3.21827900 | -1.62572900 |
| C  | 2.38743200  | -2.95475600 | 0.91750300  |
| C  | 2.73051400  | -3.45859200 | 2.16732900  |
| C  | 1.07984300  | -2.98981800 | 0.43832800  |
| C  | 1.73103800  | -3.99017300 | 2.97183300  |
| C  | 0.08095100  | -3.51095000 | 1.25297200  |
| C  | 0.41458100  | -3.99775400 | 2.51348600  |
| H  | 1.96682200  | -4.38754800 | 3.95198000  |
| H  | -0.94052800 | -3.53738400 | 0.88987400  |
| H  | 0.81711800  | -2.63486400 | -0.55396900 |
| H  | 3.76105100  | -3.43030900 | 2.50281300  |
| Cl | -0.83570700 | -4.63323500 | 3.53662000  |
| H  | -0.75475300 | -0.77428100 | 1.02643900  |
| C  | -3.83139800 | 2.53580000  | 0.85702200  |
| C  | -4.86198700 | 3.09720400  | 1.61677000  |
| C  | -3.86947700 | 2.64928700  | -0.53829200 |
| C  | -5.90565500 | 3.77654100  | 0.99599500  |
| H  | -4.85311300 | 2.98156100  | 2.69634300  |
| C  | -4.91585700 | 3.32724400  | -1.15547300 |
| H  | -3.07795000 | 2.19826500  | -1.12958900 |
| C  | -5.93528300 | 3.89369900  | -0.39119100 |
| H  | -6.70176700 | 4.20495300  | 1.59612700  |
| H  | -4.93360500 | 3.41623100  | -2.23728500 |
| H  | -6.75096800 | 4.42003900  | -0.87611700 |

#### Variable frequencies

|          |          |          |
|----------|----------|----------|
| 11.8231  | 14.2277  | 20.4210  |
| 21.9191  | 28.7811  | 32.2979  |
| 33.1293  | 39.4545  | 43.4668  |
| 46.7277  | 48.7961  | 56.4391  |
| 61.7677  | 63.8090  | 69.5846  |
| 77.2726  | 85.4809  | 92.7691  |
| 96.9065  | 102.5348 | 106.7864 |
| 112.4030 | 127.9573 | 131.5260 |
| 135.5292 | 149.7271 | 160.7337 |
| 173.0911 | 188.5060 | 190.6741 |
| 203.1291 | 214.5769 | 215.5634 |
| 227.0297 | 236.8848 | 240.9623 |

|           |           |           |
|-----------|-----------|-----------|
| 243.8442  | 257.7133  | 259.0251  |
| 268.5924  | 275.5592  | 276.8434  |
| 281.5874  | 299.3067  | 313.0239  |
| 322.4240  | 339.0329  | 343.6117  |
| 347.2927  | 360.2088  | 384.9914  |
| 387.9379  | 397.9066  | 405.4882  |
| 414.4871  | 418.5070  | 423.1462  |
| 424.3202  | 430.6090  | 442.4866  |
| 461.5880  | 464.2280  | 465.1940  |
| 483.3001  | 491.4765  | 495.9213  |
| 509.6303  | 514.7631  | 527.3366  |
| 538.6696  | 543.6907  | 546.6661  |
| 552.7619  | 570.9063  | 583.3746  |
| 588.1643  | 594.3418  | 604.2175  |
| 606.2373  | 608.3227  | 627.0626  |
| 628.9631  | 635.9757  | 642.2502  |
| 649.9445  | 653.1725  | 669.1877  |
| 682.3170  | 691.2653  | 704.2955  |
| 716.5520  | 718.2175  | 721.7307  |
| 725.8417  | 728.6107  | 731.1961  |
| 757.5201  | 758.1385  | 762.9193  |
| 767.9520  | 773.4738  | 792.5584  |
| 796.1052  | 801.3833  | 810.5643  |
| 824.4574  | 829.4575  | 837.3178  |
| 839.8962  | 851.7904  | 856.9598  |
| 861.1416  | 866.9377  | 870.2179  |
| 872.4488  | 877.9320  | 880.7793  |
| 887.4199  | 891.4490  | 906.0305  |
| 929.7547  | 943.1089  | 944.0559  |
| 967.7220  | 988.0732  | 990.0234  |
| 992.2899  | 993.9273  | 995.0513  |
| 1003.5335 | 1008.8622 | 1011.3760 |
| 1012.0413 | 1013.0322 | 1014.5449 |
| 1017.9638 | 1021.7161 | 1022.5882 |
| 1024.4649 | 1031.9891 | 1032.3443 |
| 1034.7787 | 1037.4343 | 1040.3724 |
| 1054.4365 | 1057.9434 | 1064.5839 |
| 1066.4015 | 1066.5693 | 1070.2387 |
| 1075.1022 | 1077.9146 | 1095.6752 |
| 1112.5860 | 1117.7406 | 1119.4503 |
| 1134.8183 | 1135.2238 | 1136.7841 |
| 1143.0338 | 1147.4471 | 1148.7018 |
| 1162.1980 | 1173.9354 | 1176.1099 |
| 1177.6664 | 1180.5931 | 1181.7165 |

|           |           |           |
|-----------|-----------|-----------|
| 1189.2517 | 1196.2591 | 1201.6945 |
| 1202.2807 | 1204.4871 | 1206.0281 |
| 1209.2258 | 1214.4945 | 1216.6356 |
| 1219.3446 | 1231.0245 | 1244.6674 |
| 1249.3708 | 1253.0830 | 1254.1003 |
| 1264.2719 | 1270.2327 | 1277.2494 |
| 1302.3578 | 1305.2887 | 1312.9843 |
| 1318.0790 | 1326.8623 | 1332.9695 |
| 1336.5520 | 1340.4702 | 1343.1683 |
| 1346.1615 | 1348.7274 | 1355.7783 |
| 1359.5141 | 1360.0764 | 1361.4850 |
| 1364.5666 | 1372.5301 | 1373.5346 |
| 1382.4672 | 1402.5333 | 1420.2445 |
| 1424.4551 | 1442.1676 | 1452.4446 |
| 1454.4697 | 1455.0271 | 1462.7483 |
| 1468.2824 | 1495.6681 | 1497.2107 |
| 1498.5106 | 1499.0482 | 1501.1019 |
| 1503.4165 | 1506.0654 | 1506.1462 |
| 1516.8831 | 1519.6426 | 1536.9811 |
| 1542.0742 | 1546.8133 | 1548.7823 |
| 1552.7145 | 1556.5962 | 1610.2917 |
| 1630.3133 | 1656.5967 | 1660.9086 |
| 1670.3187 | 1675.4075 | 1676.6640 |
| 1677.1570 | 1681.5055 | 1686.0247 |
| 1689.3108 | 1692.6064 | 1693.1079 |
| 1702.1503 | 1733.2923 | 3061.8855 |
| 3075.8768 | 3075.9892 | 3089.9479 |
| 3114.4294 | 3124.4844 | 3149.6103 |
| 3151.5436 | 3153.0601 | 3162.8731 |
| 3165.9633 | 3170.6807 | 3177.1741 |
| 3181.9085 | 3189.7541 | 3195.6942 |
| 3200.2841 | 3202.5124 | 3205.6312 |
| 3207.4959 | 3210.3878 | 3210.7568 |
| 3211.0516 | 3212.8219 | 3214.1763 |
| 3216.9626 | 3218.7549 | 3220.4694 |
| 3221.4806 | 3222.6132 | 3225.8998 |
| 3229.8571 | 3230.5750 | 3233.9308 |
| 3236.4482 | 3239.5249 | 3243.2543 |
| 3243.2941 | 3244.3429 | 3250.4856 |

**<sup>2</sup>M5<sup>C3</sup>**

Zero-point correction=0.778552

Thermal correction to Energy=0.826370

Thermal correction to Enthalpy=0.827314  
 Thermal correction to Gibbs Free Energy=0.692287  
 Sum of electronic and zero-point Energies=-3207.904828  
 Sum of electronic and thermal Energies=-3207.857011  
 Sum of electronic and thermal Enthalpies=-3207.856067  
 Sum of electronic and thermal Free Energies=-3207.991094

Cartesian coordinate

|   |             |             |             |
|---|-------------|-------------|-------------|
| N | -2.38145800 | 0.90217800  | 1.21737000  |
| N | -3.21211800 | -0.12427800 | 0.73464900  |
| C | -3.46333400 | -1.20388400 | 1.69152000  |
| C | -1.13637800 | 0.60968100  | 1.57356600  |
| C | -0.15459800 | 1.64435200  | 1.93002900  |
| C | -0.81023700 | 2.96683100  | 2.11990600  |
| C | -2.07654400 | 3.20874300  | 1.69357900  |
| C | -2.90528300 | 2.17866500  | 1.18792700  |
| C | 0.98645700  | 1.67170500  | 0.76614400  |
| C | 1.78379400  | 0.41694000  | 0.77776900  |
| C | 2.00696400  | -0.25293400 | -0.40104900 |
| O | 1.61191900  | -0.03108100 | -1.57614800 |
| S | -2.73694100 | -0.59518100 | -0.86842400 |
| O | -2.20794100 | 0.62656400  | -1.44082500 |
| C | -4.30364400 | -1.00006000 | -1.55931100 |
| O | -1.92940600 | -1.80218800 | -0.75603800 |
| C | -4.63607200 | -2.33690100 | -1.75119600 |
| C | -5.87844700 | -2.63571000 | -2.30037800 |
| C | -6.77200600 | -1.62132800 | -2.65387800 |
| C | -6.40042700 | -0.28519100 | -2.44601700 |
| C | -5.16794200 | 0.04011700  | -1.90274500 |
| C | -8.10606800 | -1.94519800 | -3.26896300 |
| H | -3.94821600 | -0.77620900 | 2.57084300  |
| H | -4.15511900 | -1.90156900 | 1.21502200  |
| H | -2.55692700 | -1.73922200 | 1.99011800  |
| H | 0.40590100  | 1.34287600  | 2.82545000  |
| H | -0.22371000 | 3.76240800  | 2.56527300  |
| H | -2.51559400 | 4.19623200  | 1.77791700  |
| H | 0.45542700  | 1.72883800  | -0.19197000 |
| H | -3.93078600 | -3.11842700 | -1.48820900 |
| H | -6.15446400 | -3.67275500 | -2.46281900 |
| H | -7.08746000 | 0.51093400  | -2.71853300 |
| H | -4.87548600 | 1.07604400  | -1.75350000 |
| H | -8.12072500 | -1.64795000 | -4.32193400 |
| H | -8.32132100 | -3.01345300 | -3.21559900 |
| H | -8.91043800 | -1.40340400 | -2.76486300 |

|   |             |             |             |
|---|-------------|-------------|-------------|
| C | 1.76747000  | 2.95797000  | 0.96434700  |
| C | 2.74906500  | 3.06960800  | 1.95237100  |
| C | 1.45126900  | 4.08242200  | 0.19704600  |
| C | 3.39602900  | 4.28193600  | 2.17308100  |
| H | 3.02066900  | 2.19833100  | 2.54228900  |
| C | 2.09825400  | 5.29779800  | 0.41494200  |
| H | 0.69107000  | 4.00134300  | -0.57613100 |
| C | 3.06944000  | 5.40137100  | 1.40794900  |
| H | 4.16037600  | 4.35403800  | 2.94033000  |
| H | 1.84483000  | 6.16097600  | -0.19226600 |
| H | 3.57392300  | 6.34633600  | 1.58093800  |
| H | 2.27650900  | 0.08729800  | 1.68834400  |
| C | 6.32932500  | 0.77860200  | -1.27110900 |
| C | 4.95784200  | 0.72934600  | -1.53981400 |
| C | 4.14029300  | 1.83727400  | -1.34135100 |
| C | 4.72223200  | 3.00097500  | -0.84219200 |
| C | 6.08678500  | 3.05000500  | -0.55590100 |
| C | 6.90410400  | 1.94182700  | -0.77400200 |
| C | 6.99553200  | -0.52899800 | -1.61497900 |
| C | 5.96321800  | -1.16885500 | -2.56709000 |
| C | 4.58800000  | -0.62155000 | -2.10361800 |
| H | 3.08119900  | 1.78667500  | -1.57827900 |
| H | 4.10561900  | 3.87815500  | -0.67523800 |
| H | 6.51809000  | 3.96825300  | -0.16922700 |
| H | 7.96958300  | 1.99009400  | -0.57066100 |
| H | 7.14198700  | -1.13191500 | -0.71045400 |
| H | 6.12918500  | -0.78391200 | -3.57546300 |
| H | 7.97128700  | -0.41483100 | -2.09169300 |
| H | 3.82921400  | -0.58593200 | -2.88655600 |
| N | 4.06987500  | -1.55814600 | -1.07126400 |
| O | 6.00497800  | -2.57428500 | -2.69506200 |
| C | 2.97195500  | -1.41720400 | -0.30922100 |
| C | 4.61217300  | -2.78192600 | -0.77922900 |
| N | 2.89414300  | -2.53981000 | 0.40416700  |
| N | 3.91488800  | -3.40408900 | 0.12718500  |
| C | 5.83328700  | -3.28073600 | -1.48975700 |
| H | 6.70889700  | -3.20167900 | -0.83334100 |
| H | 5.69299900  | -4.33249500 | -1.74440200 |
| C | 1.80247900  | -2.97361900 | 1.21926000  |
| C | 2.05699800  | -3.49148800 | 2.48190500  |
| C | 0.52059600  | -2.92853400 | 0.68164000  |
| C | 0.99308100  | -3.96270800 | 3.24481900  |
| C | -0.53751000 | -3.41501200 | 1.43821100  |
| C | -0.29230600 | -3.91567500 | 2.71465000  |

|    |             |             |             |
|----|-------------|-------------|-------------|
| H  | 1.15870800  | -4.36826800 | 4.23596900  |
| H  | -1.53537500 | -3.42811600 | 1.01637300  |
| H  | 0.34459400  | -2.53226800 | -0.31419700 |
| H  | 3.07315500  | -3.52977200 | 2.85858100  |
| Cl | -1.63306700 | -4.49974400 | 3.66121000  |
| H  | -0.83639000 | -0.43142000 | 1.47754300  |
| C  | -4.23985100 | 2.44055000  | 0.63039600  |
| C  | -5.39161800 | 1.75705900  | 1.04478100  |
| C  | -4.34886700 | 3.45064600  | -0.33452700 |
| C  | -6.62507500 | 2.07268300  | 0.49183500  |
| H  | -5.32325400 | 0.99084600  | 1.80911800  |
| C  | -5.58614700 | 3.75312200  | -0.89565100 |
| H  | -3.45577300 | 3.97238800  | -0.66511100 |
| C  | -6.72458200 | 3.06481000  | -0.48401600 |
| H  | -7.51225100 | 1.54312700  | 0.82215500  |
| H  | -5.65850200 | 4.52472200  | -1.65441000 |
| H  | -7.69018400 | 3.30400900  | -0.91743100 |

Variable frequencies

|          |          |          |
|----------|----------|----------|
| 6.2305   | 9.9375   | 20.6253  |
| 23.7974  | 27.6166  | 31.2420  |
| 35.1068  | 45.0352  | 47.4379  |
| 53.8575  | 58.0262  | 61.8108  |
| 70.3145  | 72.8597  | 73.8444  |
| 76.6301  | 81.6945  | 85.3652  |
| 92.2040  | 96.8929  | 110.5168 |
| 115.8040 | 123.5007 | 125.8114 |
| 142.1097 | 148.5553 | 166.5018 |
| 169.8144 | 174.1803 | 182.5758 |
| 201.8880 | 213.0924 | 217.8526 |
| 225.9681 | 240.7125 | 245.7468 |
| 251.0246 | 256.2883 | 262.0165 |
| 268.0550 | 279.6565 | 285.4555 |
| 294.7342 | 306.6487 | 314.0955 |
| 325.1908 | 335.8081 | 344.3459 |
| 364.8316 | 366.7121 | 373.3753 |
| 375.4524 | 378.3773 | 406.5375 |
| 411.1912 | 413.2295 | 415.5903 |
| 417.9689 | 430.5209 | 438.4780 |
| 453.0079 | 460.5595 | 463.2951 |
| 468.2642 | 480.2127 | 488.7129 |
| 498.3828 | 502.8280 | 525.4880 |
| 535.4704 | 538.7996 | 543.3768 |
| 550.5647 | 572.1018 | 578.4615 |



|           |           |           |
|-----------|-----------|-----------|
| 580.0174  | 592.6339  | 593.9085  |
| 608.7564  | 620.5739  | 623.2680  |
| 627.1134  | 634.6482  | 641.2841  |
| 642.4891  | 651.8053  | 653.0392  |
| 662.2850  | 690.9549  | 695.8707  |
| 698.5078  | 712.9251  | 713.4176  |
| 717.3028  | 724.5073  | 728.8011  |
| 734.8041  | 738.3781  | 744.8194  |
| 761.5554  | 777.6321  | 781.9675  |
| 789.4116  | 797.4993  | 813.2747  |
| 814.6347  | 826.6322  | 831.6048  |
| 837.2097  | 846.0757  | 850.8889  |
| 854.1460  | 860.6855  | 864.1488  |
| 865.6995  | 874.2520  | 875.5418  |
| 880.9449  | 890.7789  | 901.6502  |
| 912.9492  | 923.3861  | 951.5577  |
| 956.8177  | 962.4777  | 986.3439  |
| 988.4205  | 991.1175  | 1000.9891 |
| 1003.7260 | 1004.9618 | 1006.9065 |
| 1009.0512 | 1009.5880 | 1014.0959 |
| 1014.4661 | 1017.4858 | 1026.9400 |
| 1029.3720 | 1029.9375 | 1032.9530 |
| 1033.9874 | 1036.0101 | 1046.2404 |
| 1052.3651 | 1065.7202 | 1068.9777 |
| 1071.7628 | 1072.8223 | 1076.5425 |
| 1083.6008 | 1093.8327 | 1100.0234 |
| 1105.8702 | 1118.0908 | 1124.1958 |
| 1126.3929 | 1128.7603 | 1133.4471 |
| 1137.6577 | 1143.7028 | 1149.0150 |
| 1156.2165 | 1165.3043 | 1172.4276 |
| 1176.4533 | 1178.5951 | 1182.7925 |
| 1183.5520 | 1183.8068 | 1194.9887 |
| 1197.5112 | 1202.8428 | 1203.5618 |
| 1212.0495 | 1212.6759 | 1215.1168 |
| 1224.9939 | 1232.4585 | 1238.6241 |
| 1241.8733 | 1251.7274 | 1254.5718 |
| 1263.6808 | 1269.2233 | 1272.0435 |
| 1275.7694 | 1294.7309 | 1302.5450 |
| 1317.8834 | 1324.2980 | 1324.6588 |
| 1328.3515 | 1334.9741 | 1343.7097 |
| 1345.4898 | 1352.2395 | 1352.5721 |
| 1358.7997 | 1359.1495 | 1362.5515 |
| 1363.4576 | 1370.5109 | 1374.9206 |
| 1384.1008 | 1390.5338 | 1418.3494 |

|           |           |           |
|-----------|-----------|-----------|
| 1418.8061 | 1427.0043 | 1456.7544 |
| 1456.8528 | 1460.5852 | 1464.8809 |
| 1480.0807 | 1492.4114 | 1494.0246 |
| 1495.4424 | 1498.9648 | 1499.7859 |
| 1504.5471 | 1504.7791 | 1510.0496 |
| 1516.3152 | 1518.1753 | 1521.6863 |
| 1536.3345 | 1540.2135 | 1543.8891 |
| 1547.2519 | 1548.4400 | 1554.6097 |
| 1587.0226 | 1638.8206 | 1664.6551 |
| 1668.6529 | 1671.4563 | 1673.4010 |
| 1681.5703 | 1685.4816 | 1688.7731 |
| 1689.1115 | 1690.2045 | 1691.4335 |
| 1701.1885 | 1709.1719 | 3054.7465 |
| 3069.7678 | 3078.3767 | 3081.4879 |
| 3085.8960 | 3100.3367 | 3143.8592 |
| 3154.9416 | 3155.1059 | 3164.3606 |
| 3166.8886 | 3174.3409 | 3174.5139 |
| 3185.8813 | 3190.3874 | 3200.9350 |
| 3202.7829 | 3204.1655 | 3210.6182 |
| 3211.1189 | 3213.2284 | 3215.9702 |
| 3216.7937 | 3220.0855 | 3220.1832 |
| 3220.3367 | 3222.3938 | 3225.6311 |
| 3229.7953 | 3230.0585 | 3230.8086 |
| 3232.6071 | 3233.6902 | 3237.3277 |
| 3237.6457 | 3238.5653 | 3241.5965 |
| 3241.6527 | 3251.8551 | 3253.5505 |

## <sup>2</sup>M5C5

Zero-point correction=0.779468

Thermal correction to Energy=0.827113

Thermal correction to Enthalpy=0.828058

Thermal correction to Gibbs Free Energy=0.694615

Sum of electronic and zero-point Energies=-3207.904630

Sum of electronic and thermal Energies=-3207.856984

Sum of electronic and thermal Enthalpies=-3207.856040

Sum of electronic and thermal Free Energies=-3207.989483

### Cartesian coordinate

|   |             |            |             |
|---|-------------|------------|-------------|
| N | 1.86108100  | 1.06132500 | -1.80705200 |
| N | 3.08074300  | 0.43774100 | -2.09526700 |
| C | 3.59231300  | 0.62052300 | -3.45886600 |
| C | 0.80607300  | 0.84701100 | -2.64664300 |
| C | -0.33664400 | 1.65498300 | -2.54017900 |

|   |             |             |             |
|---|-------------|-------------|-------------|
| C | -0.51859200 | 2.35993600  | -1.39414700 |
| C | 0.38747900  | 2.09784700  | -0.23391900 |
| C | 1.77400400  | 1.85362100  | -0.70330500 |
| C | -0.17690500 | 0.74750000  | 0.54066300  |
| C | -1.64173600 | 0.54563800  | 0.37809500  |
| C | -2.08850600 | -0.27191100 | -0.63118400 |
| O | -1.47175200 | -0.80956600 | -1.59732300 |
| S | 3.18427900  | -1.18782300 | -1.50688100 |
| O | 2.22511500  | -1.24805300 | -0.41582200 |
| C | 4.82952500  | -1.19230300 | -0.87598100 |
| O | 3.09139400  | -2.08758500 | -2.64284700 |
| C | 5.81069400  | -1.91136900 | -1.54855600 |
| C | 7.10426200  | -1.90204900 | -1.03560000 |
| C | 7.41331400  | -1.18863500 | 0.12499900  |
| C | 6.39678200  | -0.47324200 | 0.77498000  |
| C | 5.09979100  | -0.46972600 | 0.28706700  |
| C | 8.80735500  | -1.20070900 | 0.69080900  |
| H | 3.52950600  | 1.68118800  | -3.70706300 |
| H | 4.64281200  | 0.32061900  | -3.44915500 |
| H | 3.06015000  | 0.02529200  | -4.20523800 |
| H | -1.05073100 | 1.65433300  | -3.35394800 |
| H | -1.36538600 | 3.02147000  | -1.24868500 |
| H | 0.37285400  | 2.92713800  | 0.47352000  |
| H | 0.32027200  | -0.07693100 | 0.02028400  |
| H | 5.55831900  | -2.46942200 | -2.44411300 |
| H | 7.88432400  | -2.45995300 | -1.54395400 |
| H | 6.62935900  | 0.08820100  | 1.67512500  |
| H | 4.31101000  | 0.07946100  | 0.79570600  |
| H | 8.85511500  | -1.85554500 | 1.56647600  |
| H | 9.53093400  | -1.56409600 | -0.04066200 |
| H | 9.10870900  | -0.20100600 | 1.01273300  |
| C | 0.27262000  | 0.79661500  | 1.97859400  |
| C | -0.28592700 | 1.71977800  | 2.87046800  |
| C | 1.30873200  | -0.02717900 | 2.42413300  |
| C | 0.19554500  | 1.83102800  | 4.17109100  |
| H | -1.09230500 | 2.37063300  | 2.53867900  |
| C | 1.78705000  | 0.07744900  | 3.72913200  |
| H | 1.75463900  | -0.73383100 | 1.73185800  |
| C | 1.23887100  | 1.01166900  | 4.60292100  |
| H | -0.24113400 | 2.55702900  | 4.84947500  |
| H | 2.59552800  | -0.56743400 | 4.05935900  |
| H | 1.61646200  | 1.10041500  | 5.61632100  |
| H | -2.33452600 | 0.92010500  | 1.12421800  |
| C | -2.54342200 | -4.25915100 | 1.32846300  |

|    |             |             |             |
|----|-------------|-------------|-------------|
| C  | -2.04005400 | -3.39743500 | 0.34863600  |
| C  | -0.73082100 | -2.92628400 | 0.40842100  |
| C  | 0.05917800  | -3.31198800 | 1.48963800  |
| C  | -0.44987700 | -4.14584300 | 2.48599700  |
| C  | -1.75353000 | -4.63254900 | 2.40922600  |
| C  | -3.94161700 | -4.70734200 | 0.98963200  |
| C  | -3.99200200 | -4.43508500 | -0.52874200 |
| C  | -3.06679100 | -3.20978000 | -0.74778900 |
| H  | -0.33979400 | -2.28891900 | -0.37858300 |
| H  | 1.08852900  | -2.97302100 | 1.54044100  |
| H  | 0.18218000  | -4.43704400 | 3.31891100  |
| H  | -2.13760000 | -5.30773900 | 3.16780100  |
| H  | -4.67977900 | -4.10778600 | 1.53614300  |
| H  | -3.52889300 | -5.27484000 | -1.05138800 |
| H  | -4.13601000 | -5.75640700 | 1.22169500  |
| H  | -2.63905900 | -3.14044100 | -1.74773200 |
| N  | -3.91458500 | -1.99650500 | -0.57289200 |
| O  | -5.27093000 | -4.29485100 | -1.10947400 |
| C  | -3.52275800 | -0.71076600 | -0.50802200 |
| C  | -5.28081600 | -2.00675700 | -0.46335100 |
| N  | -4.64579600 | -0.00670400 | -0.36164800 |
| N  | -5.75446500 | -0.80241400 | -0.32534100 |
| C  | -6.06316700 | -3.28256100 | -0.53799700 |
| H  | -6.43043400 | -3.55619600 | 0.45899600  |
| H  | -6.92629100 | -3.13550200 | -1.18943800 |
| C  | -4.79479800 | 1.41479900  | -0.32306400 |
| C  | -5.59698600 | 1.97591600  | 0.66132400  |
| C  | -4.16607500 | 2.19240400  | -1.29020300 |
| C  | -5.76649100 | 3.35582900  | 0.69009300  |
| C  | -4.33124700 | 3.57082600  | -1.25773500 |
| C  | -5.12716200 | 4.13923800  | -0.26492300 |
| H  | -6.38794500 | 3.81994800  | 1.44675400  |
| H  | -3.86501900 | 4.20234100  | -2.00563800 |
| H  | -3.56820600 | 1.71908900  | -2.06306500 |
| H  | -6.08532200 | 1.33836800  | 1.38973400  |
| Cl | -5.33530800 | 5.86493200  | -0.22976100 |
| H  | 0.94811100  | 0.09194600  | -3.40703500 |
| C  | 2.96106800  | 2.37132600  | -0.02667900 |
| C  | 4.16228900  | 2.64822000  | -0.71215400 |
| C  | 2.90026300  | 2.65750200  | 1.35021600  |
| C  | 5.26818500  | 3.13320600  | -0.03396700 |
| H  | 4.22668200  | 2.50796900  | -1.78249600 |
| C  | 4.02186100  | 3.12118400  | 2.02754600  |
| H  | 1.98773700  | 2.49217600  | 1.90841400  |

|   |            |            |             |
|---|------------|------------|-------------|
| C | 5.21162000 | 3.34992400 | 1.34351400  |
| H | 6.17925400 | 3.34560700 | -0.58252000 |
| H | 3.95547300 | 3.30680400 | 3.09403400  |
| H | 6.08507200 | 3.71578700 | 1.87328300  |

Variable frequencies

|          |          |          |
|----------|----------|----------|
| 11.0638  | 15.6610  | 18.6818  |
| 25.2310  | 28.9041  | 29.7483  |
| 30.7217  | 45.6622  | 47.7807  |
| 50.5617  | 56.6260  | 59.8608  |
| 65.9693  | 72.7678  | 78.5940  |
| 83.7096  | 86.7565  | 91.8208  |
| 100.6773 | 110.0673 | 112.2429 |
| 124.0674 | 138.5830 | 144.7631 |
| 148.6740 | 153.3658 | 173.8856 |
| 178.6697 | 183.7001 | 193.2923 |
| 202.9468 | 210.5129 | 215.7266 |
| 227.4417 | 236.4054 | 239.9620 |
| 252.6215 | 254.9877 | 260.0189 |
| 265.1281 | 279.8944 | 284.3892 |
| 292.2577 | 304.1265 | 309.5509 |
| 320.5189 | 323.1080 | 342.1539 |
| 350.8514 | 359.0076 | 371.8830 |
| 378.6280 | 384.7983 | 403.3482 |
| 418.0300 | 421.1934 | 424.8918 |
| 426.8525 | 432.5433 | 436.0021 |
| 447.2498 | 460.1108 | 465.9120 |
| 470.0911 | 485.0295 | 491.8661 |
| 497.6527 | 509.3541 | 524.0771 |
| 529.3274 | 535.5807 | 540.8365 |
| 554.8406 | 563.8785 | 571.8795 |
| 578.5179 | 591.6636 | 598.1245 |
| 607.2238 | 610.0331 | 626.6238 |
| 628.2055 | 633.5067 | 637.3788 |
| 642.9730 | 646.9752 | 653.8098 |
| 671.7276 | 686.2252 | 691.6378 |
| 704.1523 | 710.6419 | 712.8273 |
| 715.9140 | 724.4187 | 727.7753 |
| 730.0958 | 732.8185 | 747.7333 |
| 759.0196 | 767.9531 | 775.4700 |
| 787.5903 | 792.9357 | 800.9189 |
| 804.5670 | 815.4329 | 830.0353 |
| 835.5160 | 848.5362 | 849.3569 |
| 850.9650 | 857.3739 | 863.5074 |

|           |           |           |
|-----------|-----------|-----------|
| 872.6682  | 875.2979  | 881.9669  |
| 887.1469  | 890.4497  | 903.8200  |
| 916.2120  | 924.1960  | 946.3983  |
| 959.5828  | 966.5596  | 979.7307  |
| 992.9882  | 993.9295  | 995.8170  |
| 1003.2003 | 1008.3454 | 1010.6478 |
| 1012.6243 | 1015.4531 | 1016.6264 |
| 1019.0115 | 1021.4030 | 1028.3661 |
| 1028.7949 | 1031.3591 | 1034.1699 |
| 1035.3565 | 1041.5517 | 1044.3727 |
| 1051.9824 | 1067.3404 | 1070.1311 |
| 1070.6060 | 1074.8993 | 1078.6338 |
| 1083.4548 | 1097.1494 | 1106.4756 |
| 1112.0397 | 1120.3397 | 1128.4743 |
| 1129.9548 | 1132.8240 | 1135.9318 |
| 1137.8520 | 1144.1515 | 1150.9532 |
| 1155.0635 | 1167.0850 | 1172.9772 |
| 1183.2224 | 1183.6433 | 1185.5603 |
| 1188.2073 | 1190.4210 | 1192.6360 |
| 1198.4071 | 1204.1235 | 1205.7037 |
| 1211.4813 | 1212.4746 | 1218.7295 |
| 1225.4882 | 1227.3838 | 1236.3644 |
| 1241.7443 | 1247.1909 | 1257.2158 |
| 1262.9986 | 1265.5029 | 1274.3830 |
| 1295.2169 | 1300.5581 | 1302.8706 |
| 1308.4828 | 1320.5454 | 1325.9938 |
| 1336.9196 | 1340.5602 | 1344.3800 |
| 1345.6262 | 1348.2370 | 1354.7332 |
| 1359.9576 | 1361.3802 | 1365.2844 |
| 1371.3744 | 1373.0286 | 1375.3751 |
| 1383.1672 | 1388.2589 | 1418.4868 |
| 1418.9974 | 1424.8785 | 1448.2699 |
| 1454.9169 | 1458.6156 | 1459.6268 |
| 1463.9753 | 1491.1125 | 1491.4236 |
| 1496.8301 | 1497.3609 | 1498.6575 |
| 1503.5661 | 1504.1022 | 1510.9722 |
| 1516.2191 | 1518.3057 | 1523.2083 |
| 1535.6229 | 1539.8223 | 1544.9845 |
| 1548.0292 | 1551.3420 | 1553.0367 |
| 1589.1923 | 1600.2092 | 1659.1014 |
| 1669.1620 | 1669.3802 | 1675.6129 |
| 1680.7543 | 1683.9601 | 1685.0073 |
| 1688.5024 | 1691.0798 | 1692.9777 |
| 1696.4410 | 1703.0529 | 3072.1834 |

|           |           |           |
|-----------|-----------|-----------|
| 3077.8198 | 3083.5202 | 3085.2488 |
| 3139.6710 | 3145.4298 | 3148.2972 |
| 3149.1470 | 3155.8656 | 3168.8436 |
| 3172.1217 | 3177.8211 | 3181.5529 |
| 3182.1806 | 3189.6556 | 3204.1297 |
| 3209.6799 | 3214.1546 | 3214.8176 |
| 3217.2425 | 3218.9293 | 3218.9840 |
| 3223.0593 | 3225.9058 | 3226.1755 |
| 3226.5739 | 3227.5971 | 3228.0954 |
| 3231.2204 | 3232.7694 | 3232.9701 |
| 3233.7641 | 3233.8236 | 3242.9415 |
| 3244.4910 | 3245.0348 | 3247.5516 |
| 3257.8204 | 3271.1938 | 3300.6531 |

### M3-wb97xd

Zero-point correction=0.930837

Thermal correction to Energy=0.988384

Thermal correction to Enthalpy=0.989328

Thermal correction to Gibbs Free Energy=0.834357

Sum of electronic and zero-point Energies=-3555.172975

Sum of electronic and thermal Energies=-3555.115428

Sum of electronic and thermal Enthalpies=-3555.114484

Sum of electronic and thermal Free Energies=-3555.269456

### Cartesian coordinate

|   |            |             |             |
|---|------------|-------------|-------------|
| C | 4.78096000 | -0.56028200 | -0.34788800 |
| C | 3.63260600 | -0.07004200 | -0.84179300 |
| C | 2.83862900 | 0.93574500  | -0.15755700 |
| O | 3.30834900 | 1.50139600  | 0.99229400  |
| H | 5.11901800 | -0.22480800 | 0.62865900  |
| C | 5.60652600 | -1.59796800 | -0.97501900 |
| C | 6.49228700 | -2.31839900 | -0.15911400 |
| C | 5.54098700 | -1.92156100 | -2.33763400 |

|   |             |             |             |
|---|-------------|-------------|-------------|
| C | 7.26785600  | -3.34519800 | -0.68587400 |
| H | 6.53903100  | -2.06794000 | 0.89831900  |
| C | 6.32017400  | -2.94560000 | -2.86221300 |
| H | 4.88717700  | -1.35616500 | -2.99546300 |
| C | 7.18428900  | -3.66532100 | -2.03895700 |
| H | 7.93951900  | -3.89865400 | -0.03638800 |
| H | 6.25737600  | -3.17904600 | -3.92101300 |
| H | 7.79242500  | -4.46448800 | -2.45153600 |
| H | 3.25567400  | -0.41872400 | -1.79979000 |
| C | 1.92822300  | 5.96164300  | -0.09247500 |
| C | 2.36884500  | 4.64841300  | -0.23155300 |
| C | 3.51648100  | 4.34528700  | -0.95687400 |
| C | 4.20943700  | 5.38805300  | -1.56601200 |
| C | 3.76538000  | 6.70549300  | -1.43925700 |
| C | 2.62474700  | 7.00265500  | -0.69733500 |
| C | 0.69336200  | 6.03364600  | 0.76976600  |
| C | 0.23006100  | 4.56928100  | 0.93040300  |
| C | 1.45578200  | 3.68728700  | 0.49866100  |
| H | 3.86405200  | 3.32101500  | -1.04104000 |
| H | 5.10664900  | 5.17465500  | -2.13773100 |
| H | 4.31677300  | 7.50717500  | -1.92045100 |
| H | 2.28560700  | 8.02931000  | -0.59453400 |
| H | -0.11026400 | 6.63800900  | 0.33786900  |
| H | -0.06161900 | 4.35133500  | 1.95905400  |
| H | 0.92663200  | 6.46549700  | 1.74882600  |
| H | 1.97019600  | 3.26040600  | 1.36010500  |
| N | 0.98839700  | 2.57581900  | -0.31773700 |
| O | -0.94954900 | 4.29009000  | 0.17334100  |
| C | 1.67182300  | 1.39837600  | -0.67626100 |
| C | 0.08269300  | 2.81550900  | -1.31321700 |



|    |             |             |             |
|----|-------------|-------------|-------------|
| N  | 0.93064000  | 0.91256500  | -1.78219200 |
| N  | -0.02741900 | 1.87666400  | -2.18343100 |
| C  | -0.70316600 | 4.07987100  | -1.20680900 |
| H  | -0.15696200 | 4.92155900  | -1.65281200 |
| H  | -1.66437300 | 3.98477900  | -1.71241700 |
| C  | 0.54471300  | -0.42510800 | -1.99042400 |
| C  | -0.21911900 | -0.73785300 | -3.12461000 |
| C  | 0.90972300  | -1.45520000 | -1.11599900 |
| C  | -0.58778300 | -2.05063900 | -3.38628100 |
| C  | 0.53520100  | -2.76733500 | -1.37621500 |
| C  | -0.20649000 | -3.06250100 | -2.51183100 |
| H  | -1.16526300 | -2.28510900 | -4.27360900 |
| H  | 0.82992400  | -3.55355700 | -0.68978200 |
| H  | 1.50327000  | -1.24091100 | -0.23693000 |
| H  | -0.50971400 | 0.05389700  | -3.80358600 |
| Cl | -0.67680400 | -4.71686600 | -2.84071200 |
| S  | -4.44478200 | 0.91166700  | 1.53964400  |
| O  | -4.49544200 | 2.35268500  | 1.73079800  |
| O  | -4.17003900 | 0.02293200  | 2.65369500  |
| N  | -3.21439600 | 0.53459600  | 0.37946300  |
| N  | -1.99994300 | 0.22507100  | 1.00453300  |
| C  | -6.75194100 | 1.33894400  | 0.14556900  |
| H  | -6.57754200 | 2.39263000  | 0.33170700  |
| C  | -7.85830400 | 0.90885600  | -0.57821300 |
| H  | -8.56006900 | 1.64272300  | -0.96167100 |
| C  | -5.86393700 | 0.38674800  | 0.63294100  |
| C  | -6.05737700 | -0.97732600 | 0.41709500  |
| H  | -5.35566600 | -1.70561000 | 0.80808400  |
| C  | -8.07930700 | -0.44952000 | -0.81712800 |
| C  | -7.16372100 | -1.38185100 | -0.31102900 |

|   |             |             |             |
|---|-------------|-------------|-------------|
| H | -7.32038700 | -2.44106100 | -0.49071100 |
| C | -1.20192700 | 1.22507900  | 1.45901900  |
| H | -1.52508700 | 2.23747800  | 1.24263300  |
| C | -1.71275000 | -1.09459800 | 1.19527700  |
| C | -0.54890300 | -1.40714000 | 1.87756700  |
| H | -0.30088600 | -2.45406400 | 2.00336600  |
| C | -0.03354000 | 0.92243500  | 2.10948800  |
| H | 0.62503600  | 1.71810900  | 2.42971300  |
| C | 0.31303000  | -0.41114800 | 2.31831100  |
| H | 1.29862300  | -0.64388600 | 2.73722700  |
| C | -3.11752100 | 1.43964700  | -0.76692600 |
| H | -2.31326800 | 1.09094700  | -1.41781500 |
| H | -4.06455800 | 1.37883500  | -1.30546700 |
| H | -2.93519400 | 2.47856300  | -0.47383100 |
| C | -2.60867800 | -2.13553500 | 0.65327700  |
| C | -2.87977400 | -2.20194300 | -0.71526200 |
| C | -3.13567300 | -3.09257700 | 1.52151400  |
| C | -3.68167800 | -3.22066700 | -1.21004200 |
| H | -2.44187800 | -1.47499100 | -1.39099000 |
| C | -3.95110500 | -4.10378300 | 1.02091100  |
| H | -2.93083800 | -3.02724700 | 2.58490900  |
| C | -4.22265200 | -4.16851800 | -0.34271600 |
| H | -3.87244600 | -3.28290300 | -2.27567900 |
| H | -4.36863600 | -4.84085700 | 1.69803200  |
| H | -4.84948400 | -4.96365000 | -0.73259900 |
| C | 4.13541900  | -1.33065300 | 2.76181800  |
| O | 5.33885100  | -1.04334800 | 2.74285400  |
| O | 3.17256600  | -0.49777900 | 2.60234400  |
| H | 3.37675700  | 0.76683300  | 1.69018000  |
| C | 3.69960900  | -2.81081200 | 2.94534000  |

|   |              |             |             |
|---|--------------|-------------|-------------|
| C | 2.94797000   | -3.24039300 | 1.67413700  |
| H | 2.63730600   | -4.28980900 | 1.74519600  |
| H | 2.05741200   | -2.62248900 | 1.52770500  |
| H | 3.58033300   | -3.12878900 | 0.78686300  |
| C | 4.91855500   | -3.71311400 | 3.14629700  |
| H | 5.51299800   | -3.38027700 | 4.00072500  |
| H | 4.60195200   | -4.74847900 | 3.32082600  |
| H | 5.56655200   | -3.69699600 | 2.26646800  |
| C | 2.76941300   | -2.92985600 | 4.16169800  |
| H | 2.44513200   | -3.96878800 | 4.29512500  |
| H | 3.27998900   | -2.61723200 | 5.07851100  |
| H | 1.87745500   | -2.30747300 | 4.04846500  |
| C | -9.28610100  | -0.91464800 | -1.58681900 |
| H | -9.01316500  | -1.67590400 | -2.32240600 |
| H | -10.02041700 | -1.36193800 | -0.90901900 |
| H | -9.77181600  | -0.08793100 | -2.10906900 |

Variable frequencies

|          |          |          |
|----------|----------|----------|
| 9.4849   | 15.6815  | 19.7964  |
| 22.0471  | 26.5994  | 27.5012  |
| 32.2716  | 33.3601  | 34.9283  |
| 38.7309  | 42.8778  | 49.8386  |
| 56.4409  | 63.4276  | 67.2325  |
| 68.9970  | 70.5128  | 73.0218  |
| 76.1968  | 84.9913  | 86.4184  |
| 89.3090  | 91.2922  | 93.7535  |
| 98.2563  | 103.5730 | 113.5381 |
| 117.2910 | 126.1385 | 127.5920 |
| 138.2668 | 148.3758 | 149.5458 |
| 155.4193 | 169.2637 | 179.6436 |

|          |          |          |
|----------|----------|----------|
| 188.5484 | 191.0200 | 198.0009 |
| 203.1764 | 213.7148 | 225.5312 |
| 234.9240 | 242.5909 | 243.8707 |
| 255.6912 | 261.0229 | 273.3729 |
| 273.9643 | 278.0163 | 280.0303 |
| 290.3364 | 291.8855 | 295.4550 |
| 298.5878 | 306.9193 | 312.8744 |
| 317.9757 | 328.9914 | 334.9830 |
| 345.4089 | 354.4643 | 363.0522 |
| 366.7259 | 373.2254 | 386.5383 |
| 391.1953 | 392.9767 | 401.2841 |
| 416.1681 | 418.8616 | 426.1217 |
| 428.1359 | 429.3962 | 433.9944 |
| 436.0305 | 449.9770 | 458.8456 |
| 468.7637 | 488.1704 | 493.2256 |
| 500.4015 | 506.5063 | 509.5988 |
| 523.3394 | 526.8661 | 532.3015 |
| 546.4885 | 548.7054 | 563.3721 |
| 565.0749 | 571.5428 | 585.9922 |
| 589.9075 | 590.4085 | 598.1992 |
| 604.7285 | 610.5500 | 634.9992 |
| 635.2628 | 637.2317 | 646.1929 |
| 650.1481 | 651.6712 | 668.4223 |
| 670.6823 | 685.3283 | 704.5248 |
| 722.8398 | 724.0937 | 725.6694 |
| 727.2846 | 728.5388 | 729.7280 |
| 754.7153 | 755.8865 | 763.1735 |
| 774.6005 | 776.0389 | 782.7140 |
| 792.4159 | 802.6740 | 803.8445 |
| 816.1232 | 826.8730 | 834.7222 |

|           |           |           |
|-----------|-----------|-----------|
| 840.2362  | 849.2773  | 856.3038  |
| 857.4633  | 860.2216  | 865.0361  |
| 878.6451  | 881.0541  | 883.7728  |
| 891.3357  | 893.0717  | 896.5107  |
| 898.3356  | 905.5266  | 915.4224  |
| 938.1858  | 952.3736  | 955.5851  |
| 957.5591  | 958.2559  | 968.5333  |
| 970.9574  | 974.7131  | 983.8705  |
| 987.2136  | 994.8180  | 1003.5739 |
| 1007.1076 | 1011.7165 | 1016.9177 |
| 1017.4507 | 1021.1081 | 1022.8715 |
| 1024.9882 | 1026.3744 | 1028.0453 |
| 1031.2212 | 1033.6580 | 1038.0998 |
| 1045.9790 | 1048.3703 | 1050.5449 |
| 1051.5328 | 1054.7009 | 1057.6150 |
| 1057.7542 | 1064.9377 | 1071.2178 |
| 1072.0775 | 1076.0720 | 1077.5938 |
| 1081.2398 | 1093.0142 | 1105.9705 |
| 1122.6490 | 1123.1747 | 1124.0047 |
| 1125.1673 | 1128.6847 | 1133.7020 |
| 1141.9530 | 1152.7987 | 1160.8982 |
| 1170.2695 | 1172.0108 | 1181.3745 |
| 1184.0730 | 1191.8568 | 1192.3755 |
| 1193.1172 | 1198.1134 | 1209.0850 |
| 1218.9095 | 1222.2189 | 1226.1549 |
| 1226.8026 | 1228.7011 | 1239.1450 |
| 1246.7728 | 1249.1435 | 1251.2405 |
| 1255.7011 | 1259.1803 | 1261.1200 |
| 1269.3770 | 1273.5099 | 1288.2733 |
| 1292.8941 | 1302.3623 | 1317.1187 |

|           |           |           |
|-----------|-----------|-----------|
| 1328.7273 | 1330.4630 | 1330.7232 |
| 1334.2711 | 1338.6456 | 1342.9648 |
| 1346.3258 | 1351.1208 | 1356.2476 |
| 1360.5058 | 1360.9683 | 1362.0700 |
| 1368.2758 | 1374.8511 | 1376.1933 |
| 1376.6231 | 1383.9727 | 1388.9506 |
| 1391.8283 | 1397.2092 | 1400.6154 |
| 1408.4633 | 1414.6175 | 1417.9119 |
| 1433.4013 | 1433.7332 | 1449.3209 |
| 1464.4496 | 1468.9454 | 1474.9690 |
| 1484.1800 | 1487.7100 | 1488.3165 |
| 1490.0642 | 1494.5940 | 1501.9075 |
| 1503.5965 | 1504.7946 | 1506.2906 |
| 1507.5579 | 1510.2296 | 1512.2151 |
| 1515.7656 | 1518.0682 | 1520.3794 |
| 1525.1645 | 1534.0718 | 1536.1772 |
| 1544.7695 | 1547.9108 | 1553.9732 |
| 1556.7839 | 1561.4564 | 1585.1427 |
| 1651.3455 | 1651.9669 | 1660.6598 |
| 1662.3518 | 1669.4011 | 1677.6799 |
| 1681.7836 | 1689.5735 | 1690.2433 |
| 1690.5202 | 1695.0897 | 1700.3702 |
| 1728.2901 | 1732.0967 | 1737.9335 |
| 1760.8471 | 2847.9103 | 3051.7187 |
| 3054.3205 | 3059.7642 | 3061.4229 |
| 3071.0371 | 3072.3105 | 3079.7788 |
| 3085.0172 | 3129.5332 | 3130.9115 |
| 3131.8785 | 3139.4122 | 3140.1152 |
| 3146.7939 | 3153.0448 | 3159.6950 |
| 3160.5752 | 3164.9299 | 3166.9187 |

|           |           |           |
|-----------|-----------|-----------|
| 3169.6289 | 3171.6386 | 3194.5395 |
| 3201.6955 | 3204.1688 | 3207.8922 |
| 3210.1396 | 3217.9003 | 3218.8433 |
| 3223.1621 | 3223.8640 | 3224.2596 |
| 3224.6028 | 3225.2419 | 3230.7760 |
| 3233.6214 | 3233.6864 | 3237.9710 |
| 3238.0559 | 3244.0777 | 3245.0531 |
| 3252.5248 | 3252.7584 | 3254.2522 |
| 3254.5616 | 3255.1338 | 3264.4431 |
| 3265.1114 | 3269.6864 | 3289.3373 |

**osTS3-wb97xd**

Zero-point correction=0.925974

Thermal correction to Energy=0.983477

Thermal correction to Enthalpy=0.984421

Thermal correction to Gibbs Free Energy=0.829112

Sum of electronic and zero-point Energies=-3555.168252

Sum of electronic and thermal Energies=-3555.110749

Sum of electronic and thermal Enthalpies=-3555.109805

Sum of electronic and thermal Free Energies=-3555.265113

Cartesian coordinate

|   |            |             |             |
|---|------------|-------------|-------------|
| C | 4.68001300 | -0.46276100 | -0.31529100 |
| C | 3.42112700 | -0.22965300 | -0.72643900 |
| C | 2.59579500 | 0.81253900  | -0.11859400 |
| O | 3.08490500 | 1.56384100  | 0.83427800  |
| H | 5.06587200 | 0.13315100  | 0.50626400  |
| C | 5.58245700 | -1.49492200 | -0.83252100 |
| C | 6.68753300 | -1.86323600 | -0.04917600 |

|   |             |             |             |
|---|-------------|-------------|-------------|
| C | 5.38533000  | -2.15226600 | -2.05612000 |
| C | 7.55566200  | -2.86554200 | -0.46779300 |
| H | 6.84130700  | -1.36089800 | 0.90263300  |
| C | 6.25615000  | -3.15015300 | -2.47443200 |
| H | 4.55110600  | -1.87191400 | -2.69262200 |
| C | 7.34425700  | -3.51350000 | -1.68214000 |
| H | 8.40076400  | -3.14042700 | 0.15618500  |
| H | 6.08969700  | -3.64391400 | -3.42708300 |
| H | 8.02473600  | -4.29196000 | -2.01269100 |
| H | 3.00950800  | -0.79237900 | -1.55707300 |
| C | 1.78428900  | 5.66474800  | -0.98056500 |
| C | 2.16695900  | 4.33151800  | -0.86164100 |
| C | 3.28876400  | 3.84319000  | -1.52422800 |
| C | 4.00475300  | 4.71090400  | -2.34418500 |
| C | 3.61333200  | 6.04366600  | -2.48250000 |
| C | 2.50535800  | 6.53236200  | -1.79464100 |
| C | 0.58986700  | 5.96734700  | -0.11219800 |
| C | 0.07459400  | 4.58855000  | 0.35845300  |
| C | 1.24246900  | 3.57875300  | 0.07136800  |
| H | 3.60735600  | 2.81624400  | -1.38690000 |
| H | 4.88155900  | 4.34930700  | -2.87146100 |
| H | 4.18473000  | 6.70722400  | -3.12402000 |
| H | 2.21218300  | 7.57361500  | -1.89261000 |
| H | -0.20749800 | 6.50925400  | -0.63021900 |
| H | -0.17207500 | 4.59291100  | 1.42144000  |
| H | 0.88366500  | 6.57624500  | 0.74974600  |
| H | 1.77633500  | 3.29762400  | 0.97867600  |
| N | 0.70201300  | 2.34677900  | -0.49463300 |
| O | -1.15297100 | 4.23443900  | -0.27866300 |
| C | 1.34416700  | 1.10622400  | -0.65161700 |



|    |             |             |             |
|----|-------------|-------------|-------------|
| C  | -0.25856200 | 2.42299900  | -1.45693000 |
| N  | 0.53130100  | 0.45474400  | -1.60738400 |
| N  | -0.43381300 | 1.33199300  | -2.11875600 |
| C  | -0.98395200 | 3.71996100  | -1.58501100 |
| H  | -0.41573800 | 4.41164800  | -2.22228500 |
| H  | -1.96975100 | 3.58078500  | -2.02857600 |
| C  | 0.37570100  | -0.90038200 | -1.92024200 |
| C  | -0.34155400 | -1.24817400 | -3.07396400 |
| C  | 0.88067200  | -1.92406600 | -1.10772100 |
| C  | -0.58933600 | -2.57925100 | -3.37684300 |
| C  | 0.62088800  | -3.25315000 | -1.40456700 |
| C  | -0.12218600 | -3.57788100 | -2.53304300 |
| H  | -1.15233800 | -2.83600800 | -4.26708100 |
| H  | 0.99831800  | -4.03332300 | -0.75333500 |
| H  | 1.46140500  | -1.68036800 | -0.22916600 |
| H  | -0.72196100 | -0.46644900 | -3.71810000 |
| Cl | -0.46731300 | -5.25721300 | -2.89488500 |
| S  | -4.57916400 | 0.87826800  | 1.87687100  |
| O  | -4.89228100 | 2.25822500  | 2.22060600  |
| O  | -4.02228600 | -0.02839000 | 2.86457600  |
| N  | -3.44692500 | 0.85432800  | 0.57986700  |
| N  | -2.13900000 | 0.62457400  | 0.99528200  |
| C  | -7.07690500 | 0.93797100  | 0.76380900  |
| H  | -7.08329300 | 1.99002400  | 1.02623700  |
| C  | -8.15931000 | 0.34986000  | 0.11774000  |
| H  | -9.02490800 | 0.95656400  | -0.12929300 |
| C  | -5.97601500 | 0.14866700  | 1.07512700  |
| C  | -5.93627800 | -1.20902400 | 0.75913900  |
| H  | -5.07028700 | -1.81089800 | 1.01131600  |
| C  | -8.14866300 | -1.00580800 | -0.21683900 |

|   |             |             |             |
|---|-------------|-------------|-------------|
| C | -7.02341900 | -1.77282400 | 0.11290800  |
| H | -6.99681700 | -2.82790700 | -0.14220400 |
| C | -1.44090700 | 1.62169300  | 1.62009200  |
| H | -1.92717400 | 2.58767300  | 1.64352300  |
| C | -1.66383600 | -0.67227400 | 0.94295000  |
| C | -0.44017600 | -0.92649000 | 1.51816200  |
| H | -0.06640400 | -1.94049200 | 1.47280000  |
| C | -0.20665400 | 1.37989700  | 2.15026300  |
| H | 0.33820500  | 2.19011700  | 2.61627900  |
| C | 0.34574000  | 0.09282400  | 2.05633800  |
| H | 1.33118100  | -0.11706400 | 2.45758500  |
| C | -3.61894400 | 1.86897800  | -0.45595100 |
| H | -2.97167000 | 1.59414500  | -1.29016900 |
| H | -4.65806200 | 1.83254500  | -0.78747000 |
| H | -3.38001000 | 2.88088600  | -0.11277900 |
| C | -2.44065400 | -1.72711800 | 0.26938000  |
| C | -2.93616200 | -1.55412300 | -1.02584000 |
| C | -2.62719600 | -2.95121300 | 0.91926300  |
| C | -3.61561300 | -2.58757400 | -1.65552300 |
| H | -2.75335400 | -0.62621800 | -1.55490300 |
| C | -3.31072900 | -3.98328400 | 0.28541000  |
| H | -2.25481800 | -3.08359800 | 1.93002400  |
| C | -3.80832700 | -3.80215100 | -1.00230100 |
| H | -3.98417300 | -2.44796900 | -2.66613300 |
| H | -3.45392300 | -4.92836300 | 0.79799400  |
| H | -4.33379600 | -4.61036400 | -1.50010000 |
| C | 4.52845400  | -0.55774400 | 2.99493300  |
| O | 5.61302000  | -0.05884000 | 2.74621000  |
| O | 3.37278700  | 0.01122900  | 2.71490000  |
| H | 3.40494500  | 0.75621800  | 1.96507200  |

|   |              |             |             |
|---|--------------|-------------|-------------|
| C | 4.36326900   | -1.95006800 | 3.61401800  |
| C | 3.80006000   | -2.86454300 | 2.50847400  |
| H | 3.66339400   | -3.87908300 | 2.89763300  |
| H | 2.83490900   | -2.49282700 | 2.15184500  |
| H | 4.48258000   | -2.91271400 | 1.65369300  |
| C | 5.72202900   | -2.47453800 | 4.08090600  |
| H | 6.15946800   | -1.81483500 | 4.83521200  |
| H | 5.60738000   | -3.47209300 | 4.51773200  |
| H | 6.42419900   | -2.53852600 | 3.24622200  |
| C | 3.37996100   | -1.89179600 | 4.79232700  |
| H | 3.25587700   | -2.89040600 | 5.22458800  |
| H | 3.74719700   | -1.22624500 | 5.58009600  |
| H | 2.40005900   | -1.53008700 | 4.47134600  |
| C | -9.32435500  | -1.64662500 | -0.90450600 |
| H | -8.99993500  | -2.24074800 | -1.76346800 |
| H | -9.84792400  | -2.32143000 | -0.21977900 |
| H | -10.04099900 | -0.90039000 | -1.25360700 |

Variable frequencies

|            |          |          |
|------------|----------|----------|
| -1702.2961 | 12.5609  | 16.2134  |
| 21.2913    | 22.9310  | 23.5599  |
| 27.2246    | 29.5529  | 30.0602  |
| 33.5246    | 42.8550  | 43.5557  |
| 46.6314    | 48.2050  | 48.5387  |
| 50.6148    | 61.0066  | 66.1397  |
| 70.2077    | 71.7264  | 78.0958  |
| 83.4369    | 85.3651  | 92.1613  |
| 96.0900    | 105.4305 | 111.3308 |
| 116.1653   | 123.7076 | 127.4356 |
| 129.4984   | 142.4376 | 149.4405 |

|          |          |          |
|----------|----------|----------|
| 156.0591 | 160.6388 | 172.1504 |
| 181.7853 | 187.8554 | 195.5103 |
| 211.9929 | 216.7801 | 224.7746 |
| 225.5505 | 233.1749 | 242.1505 |
| 256.3845 | 260.7377 | 261.6530 |
| 271.6221 | 272.1046 | 279.3011 |
| 281.3835 | 283.1846 | 297.8141 |
| 299.9113 | 302.7155 | 306.0505 |
| 313.6816 | 320.7956 | 327.5779 |
| 339.4884 | 347.2105 | 353.9190 |
| 360.6665 | 366.2624 | 374.7330 |
| 386.0776 | 387.0778 | 388.8972 |
| 400.9305 | 420.1798 | 421.0683 |
| 424.7775 | 425.9758 | 438.5198 |
| 444.9354 | 446.9745 | 450.3526 |
| 464.6695 | 469.4522 | 487.6925 |
| 496.3485 | 502.8473 | 505.6337 |
| 510.1329 | 519.3304 | 523.9883 |
| 532.4481 | 540.7401 | 552.9682 |
| 562.8878 | 567.3454 | 571.1791 |
| 580.0231 | 588.6147 | 590.8266 |
| 601.4094 | 606.7235 | 612.6116 |
| 633.8749 | 636.8328 | 638.1497 |
| 647.8978 | 648.2899 | 650.2664 |
| 665.0231 | 674.0403 | 693.6880 |
| 707.1007 | 720.8483 | 721.1965 |
| 723.4847 | 726.2520 | 729.0960 |
| 729.6895 | 732.0411 | 756.5139 |
| 770.9567 | 777.6272 | 780.6822 |
| 786.8370 | 788.9023 | 790.1003 |

|           |           |           |
|-----------|-----------|-----------|
| 793.7534  | 803.3127  | 815.9689  |
| 831.2737  | 841.4675  | 843.8585  |
| 844.7226  | 857.0227  | 862.0360  |
| 871.3649  | 875.5885  | 877.4960  |
| 880.3778  | 880.8373  | 891.6040  |
| 895.3101  | 898.9011  | 905.6077  |
| 914.8375  | 918.1081  | 954.5922  |
| 955.2450  | 956.0898  | 958.9559  |
| 965.6165  | 973.4179  | 975.7347  |
| 979.4037  | 985.6293  | 995.3847  |
| 1000.4995 | 1009.5825 | 1010.1391 |
| 1012.0078 | 1020.5166 | 1020.7987 |
| 1022.2074 | 1022.8971 | 1025.4554 |
| 1025.5736 | 1025.7698 | 1027.8818 |
| 1028.2338 | 1035.3441 | 1042.6381 |
| 1052.1754 | 1053.7144 | 1055.8279 |
| 1058.0224 | 1058.8276 | 1064.3134 |
| 1071.7033 | 1072.0261 | 1073.8838 |
| 1081.8464 | 1086.5500 | 1095.2839 |
| 1110.3999 | 1122.9806 | 1124.6117 |
| 1125.1764 | 1128.6965 | 1135.1340 |
| 1146.0247 | 1157.3970 | 1159.7908 |
| 1159.9398 | 1173.8777 | 1184.9343 |
| 1185.0643 | 1194.1662 | 1194.3979 |
| 1194.9804 | 1199.2134 | 1203.7451 |
| 1207.8104 | 1218.5903 | 1225.0568 |
| 1225.7621 | 1226.8134 | 1228.2690 |
| 1230.6419 | 1236.4544 | 1241.4818 |
| 1252.9665 | 1253.9783 | 1255.5346 |
| 1256.8428 | 1262.6297 | 1276.0294 |

|           |           |           |
|-----------|-----------|-----------|
| 1290.7881 | 1295.1676 | 1305.0452 |
| 1317.3936 | 1323.7221 | 1328.3147 |
| 1332.5995 | 1336.1061 | 1338.8193 |
| 1342.5810 | 1347.0809 | 1348.1081 |
| 1358.4217 | 1361.6276 | 1362.9919 |
| 1367.8833 | 1372.3088 | 1374.3056 |
| 1379.6044 | 1382.9104 | 1384.4822 |
| 1393.5911 | 1394.3764 | 1395.4939 |
| 1406.2920 | 1410.9332 | 1423.9148 |
| 1424.6766 | 1434.1520 | 1445.5225 |
| 1457.1147 | 1459.9645 | 1463.9195 |
| 1476.3707 | 1484.1484 | 1490.6768 |
| 1491.4151 | 1495.2175 | 1499.2112 |
| 1500.8056 | 1501.4650 | 1504.0052 |
| 1507.0469 | 1509.0213 | 1511.1603 |
| 1516.3957 | 1517.6451 | 1517.8378 |
| 1520.4051 | 1520.9574 | 1537.5787 |
| 1542.6309 | 1545.7306 | 1550.0380 |
| 1555.1240 | 1558.9606 | 1566.6298 |
| 1583.1839 | 1587.3418 | 1651.0661 |
| 1660.8910 | 1661.3897 | 1666.1630 |
| 1676.2465 | 1681.5655 | 1687.2450 |
| 1688.5617 | 1694.1146 | 1694.9812 |
| 1698.7811 | 1712.6535 | 1732.4588 |
| 1790.5310 | 2146.7645 | 3053.5778 |
| 3057.6442 | 3059.9796 | 3066.7955 |
| 3071.1916 | 3072.4226 | 3076.2582 |
| 3124.3551 | 3135.8879 | 3137.4590 |
| 3142.1425 | 3145.1730 | 3146.9994 |
| 3150.6720 | 3160.5923 | 3165.9540 |

|           |           |           |
|-----------|-----------|-----------|
| 3167.3938 | 3168.1805 | 3169.9005 |
| 3170.5589 | 3190.7045 | 3201.6974 |
| 3206.6664 | 3212.6137 | 3215.6409 |
| 3215.9069 | 3216.5962 | 3217.7882 |
| 3221.8467 | 3226.2218 | 3227.4995 |
| 3228.5514 | 3234.4256 | 3235.0609 |
| 3236.2656 | 3238.3136 | 3239.7164 |
| 3244.8252 | 3245.2091 | 3245.6704 |
| 3245.9298 | 3247.0792 | 3258.7974 |
| 3267.2957 | 3269.6729 | 3275.0423 |
| 3275.9682 | 3280.8557 | 3293.6972 |

## Part 15: References

1. C. Y. Legault, CYLview, 1.0b, Université de Sherbrooke, 2009, <http://www.cylview.org>.
2. Chemcraft—graphical software for visualization of quantum chemistry computations, <https://www.chemcraftprog.com>.
3. A. V. Marenich, C. J. Cramer, D. G. Truhlar, Universal solvation model based on solute electron density and on a continuum model of the solvent defined by the bulk dielectric constant and atomic surface tensions. *J. Phy. Chem. B*, 2009, **113**, 6378 – 6396.
4. J.-D. Chai, M. Head-Gordon, Long-range corrected hybrid density functionals with damped atom–atom dispersion corrections. *Phys. Chem. Chem. Phys.*, 2008, **10**, 6615–6620.
5. Liptak, M. D.; Shields, G. C. Accurate PKa Calculations for Carboxylic Acids Using Complete Basis Set and Gaussian-n Models Combined with CPCM Continuum Solvation Methods. *J. Am. Chem. Soc.*, 2001, **123**, 7314–7319.
6. L. R. Domingo, M. Ríos-Gutiérrez, P. Pérez, Applications of the Conceptual Density Functional Theory Indices to Organic Chemistry Reactivity. *Molecules.*, 2016, **21**, 748.
7. L. R. Domingo, E. Chamorro, P. Pérez, Understanding the Reactivity of Captodative Ethylenes in Polar Cycloaddition Reactions. A Theoretical Study. *J. Org. Chem.*, 2008, **73**, 4615 – 4624.
8. T. Lu and Q. Chen, Interaction Region Indicator: A Simple Real Space Function Clearly Revealing Both Chemical Bonds and Weak Interactions\*\*, *Chem. Meth.*, 2021, **1**, 231–239.

9. E. R. Johnson, S. Keinan, P. Mori-Sánchez, J. Contreras-García, A. J. Cohen and W. Yang, Revealing Noncovalent Interactions, *J. Am. Chem. Soc.*, 2010, **132**, 6498-6506.
10. J. Contreras-García, E. R. Johnson, S. Keinan, R. Chaudret, J.-P. Piquemal, D. N. Beratan and W. Yang, NCIPLOT: A Program for Plotting Noncovalent Interaction Regions, *J. Chem. Theory Comput.*, 2011, **7**, 625-632.
11. Q. Shi, W. Zhang, Y. Wang, L. Qu and D. Wei, Insights into the isothioureacatalyzed asymmetric [4 + 2] annulation of phenylacetic acid with alkylidene pyrazolone, *Org. Biomol. Chem.*, 2018, **16**, 2301-2311.
12. Y. Wang, Y. Wang, X. Wang, X. Li, L.-B. Qu and D. Wei, Competing mechanisms and origins of chemo- and stereo-selectivities of NHC-catalyzed reactions of enals with 2-aminoacrylates, *Catal. Sci. Technol.*, 2018, **8**, 4229-4240.
